# Supplementary material
Source: PubMed Central journal article supplement (PMC6021687)
Supplement: AAC.02569-17_zac007187286s1.pdf [file AAC.02569-17_zac007187286s1.pdf]

**Supplementary Material – Karlowsky *et al*, “*In Vitro* activity of ceftazidime-avibactam against clinical isolates of *Enterobacteriaceae* and *Pseudomonas aeruginosa* collected in Asia-Pacific countries: Results from the INFORM Global Surveillance Program, 2012–2015”**

**Figure S1A.** Distribution of genes encoding  $\beta$ -lactamase enzyme types among 2,388 molecularly characterized *Enterobacteriaceae* isolates collected in Asia-Pacific countries from 2012–2015

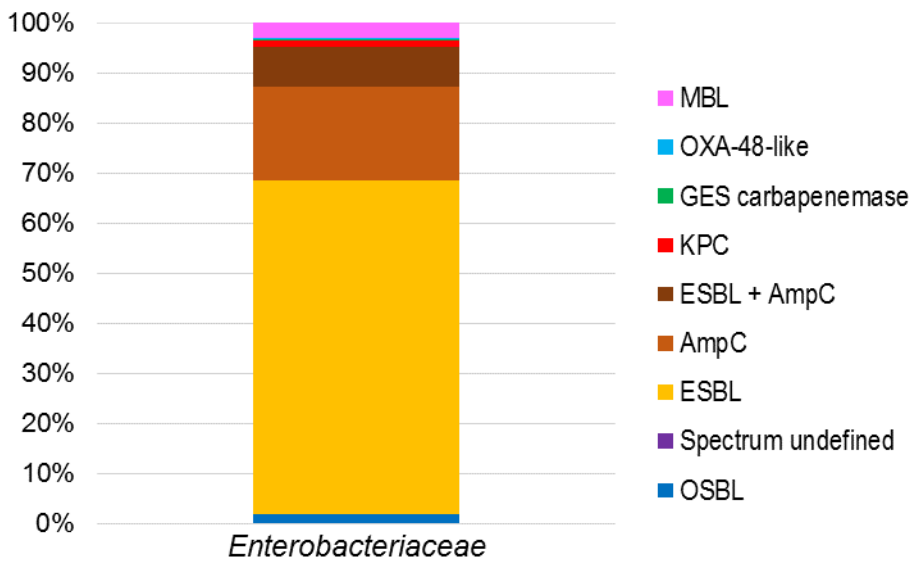

The  $\beta$ -lactamase content of each subset is described in the footnote to Table 2; includes intrinsic and acquired  $\beta$ -lactamases. OSBL, original-spectrum  $\beta$ -lactamase (e.g. TEM-1, SHV-1, SHV-11); Spectrum undefined, SHV-type and/or TEM-type  $\beta$ -lactamase with undefined spectrum of activity; ESBL, extended-spectrum  $\beta$ -lactamase; MBL, metallo- $\beta$ -lactamase.

**Figure S1B.** Distribution of genes encoding acquired ESBLs in molecularly characterized isolates of *Enterobacteriaceae* collected in Asia-Pacific countries

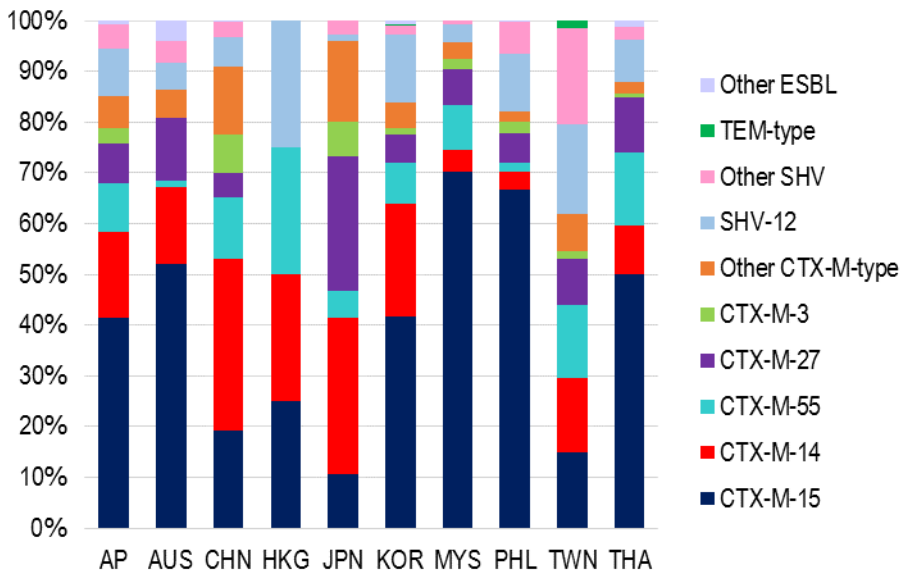

Region/Country (no. of ESBL genes detected | no. of ESBL-producing isolates): AP, Asia-Pacific (2010 | 1839); AUS, Australia (73 | 69); CHN, China (452 | 402); HKG, Hong Kong (8 | 8); JPN, Japan (75 | 73); KOR, South Korea 285 | 261); MYS, Malaysia (145 | 140); PHL, Philippines (358 | 329); TWN, Taiwan (200 | 183); THA, Thailand (414 | 374). Some isolates carried more than one ESBL.

ESBL subtypes identified (total no. of genes): CTX-M-15 (832), CTX-M-14 (339), CTX-M-55 (193), CTX-M-27 (160), CTX-M-3 (62), CTX-M-65 (44), CTX-M-24 (19), CTX-M-79 (13), CTX-M-9 (7), CTX-M-2 (4), CTX-M-22 (4), CTX-M-90 (4), CTX-M-28 (3), CTX-M-130 (3), CTX-M-1 (2), CTX-M-8 (2), CTX-M-13 (2), CTX-M-19 (2), CTX-M-40 (2), CTX-M-104 (2), CTX-M-12 (1), CTX-M-64 (1), CTX-M-74 (1), CTX-M-75 (1), CTX-M-101 (1), CTX-M-116 (1), CTX-M-125 (1), CTX-M-134 (1), CTX-M-145 (1), CTX-M-149 (1), CTX-M-161 (1), CTX-M-179 (1), CTX-M-type (1), SHV-12 (186), SHV-5 (39), SHV-28 (19), SHV-2A (15), SHV-31 (10), SHV-2 (7), SHV-38 (2), SHV-45 (1), SHV-55 (1), SHV-90 (1), SHV-115 (1), TEM-12 (1), TEM-20 (1), TEM-25 (1), TEM-29 (1), VEB-1 (4), VEB-6 (2), VEB-1A (1), VEB-14 (1), VEB-17 (1), PER-1 (2), PER-3 (1).

**Figure S1C.** Distribution of genes encoding acquired AmpC  $\beta$ -lactamases in molecularly characterized isolates of *Enterobacteriaceae* collected in Asia-Pacific countries

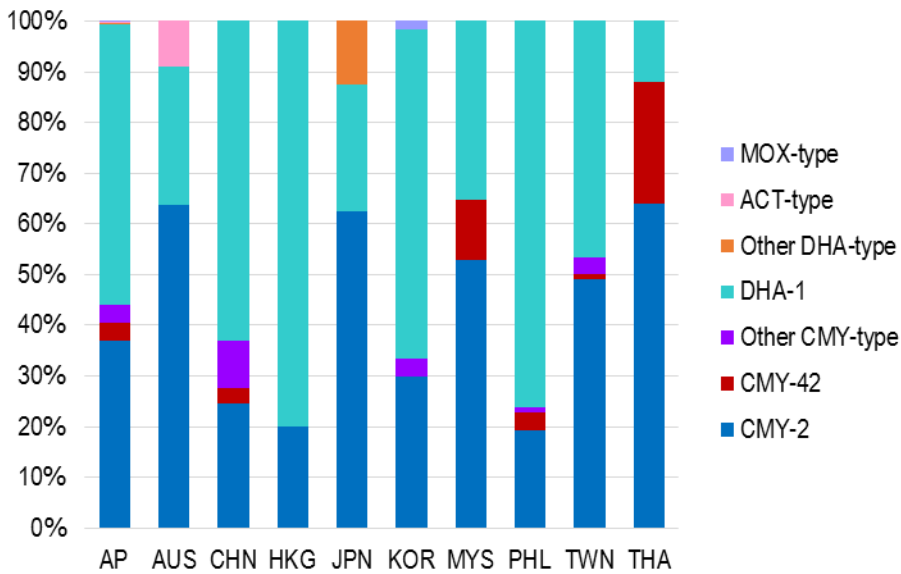

Region/Country (no. of AmpC genes detected | no. of AmpC-producing isolates): AP, Asia-Pacific (394 | 387); AUS, Australia (11 | 11); CHN, China (65 | 65); HKG, Hong Kong (5 | 5); JPN, Japan (8 | 8); KOR, South Korea (57 | 57); MYS, Malaysia (17 | 16); PHL, Philippines (88 | 86); TWN, Taiwan (118 | 114); THA, Thailand (25 | 25). Some isolates carried more than one AmpC.

AmpC subtypes identified (total no. of genes): CMY-2 (146); CMY-42 (14), CMY-32 (2), CMY-34 (2), CMY-4 (1), CMY-6 (1), CMY-10 (1), CMY-11 (1), CMY-59 (1), CMY-62 (1), CMY-81 (1), CMY-88 (1), CMY-type (1), DHA-1 (218), DHA-type (1), ACT-type (1), MOX-type (1).

**Figure S1D.** Distribution of genes encoding acquired carbapenemases in molecularly characterized isolates of *Enterobacteriaceae* collected in Asia–Pacific countries

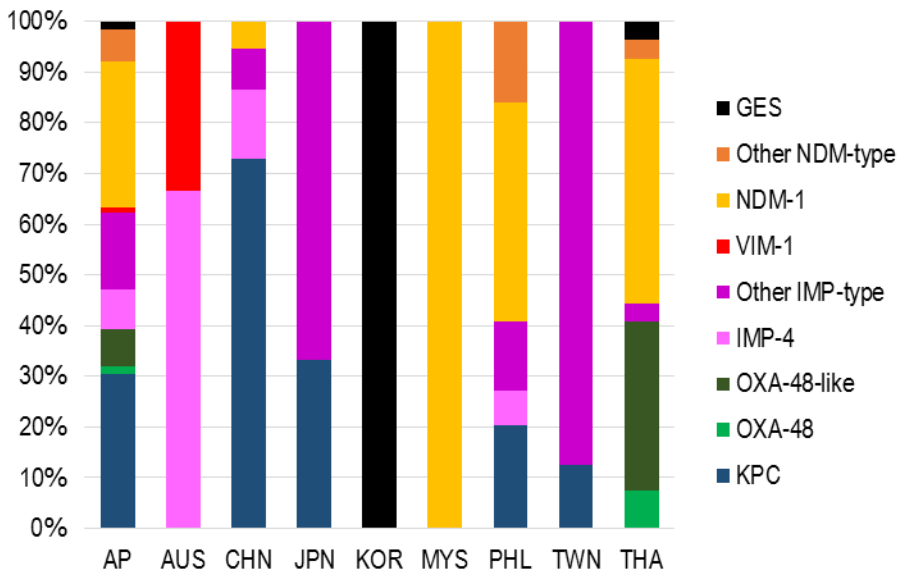

Region/Country (no. of carbapenemase genes detected | no. of carbapenemase–producing isolates): AP, Asia–Pacific (125 | 118); AUS, Australia (3 | 3); CHN, China (37 | 35); HKG, Hong Kong (0 | 0); JPN, Japan (3 | 3); KOR, South Korea (1 | 1); MYS, Malaysia (2 | 2); PHL, Philippines (44 | 44); TWN, Taiwan (8 | 8); THA, Thailand (27 | 22). Some isolates carried more than one carbapenemase.

Carbapenemase subtypes identified (total no. of genes): KPC–2 (37), KPC–12 (1), OXA–232 (6), OXA–181 (3), OXA–48 (2), IMP–4 (10), IMP–8 (7), IMP–26 (6), IMP–1 (4), IMP–14 (1), IMP–47 (1), VIM–1 (1), NDM–1 (36), NDM–7 (7), NDM–5 (1), GES–5 (1), GES–13 (1).

**Figure S2.** Percentage of isolates of *Enterobacteriaceae* collected in 2012–2015 with resistant phenotypes, by Asia–Pacific country.<sup>a</sup>

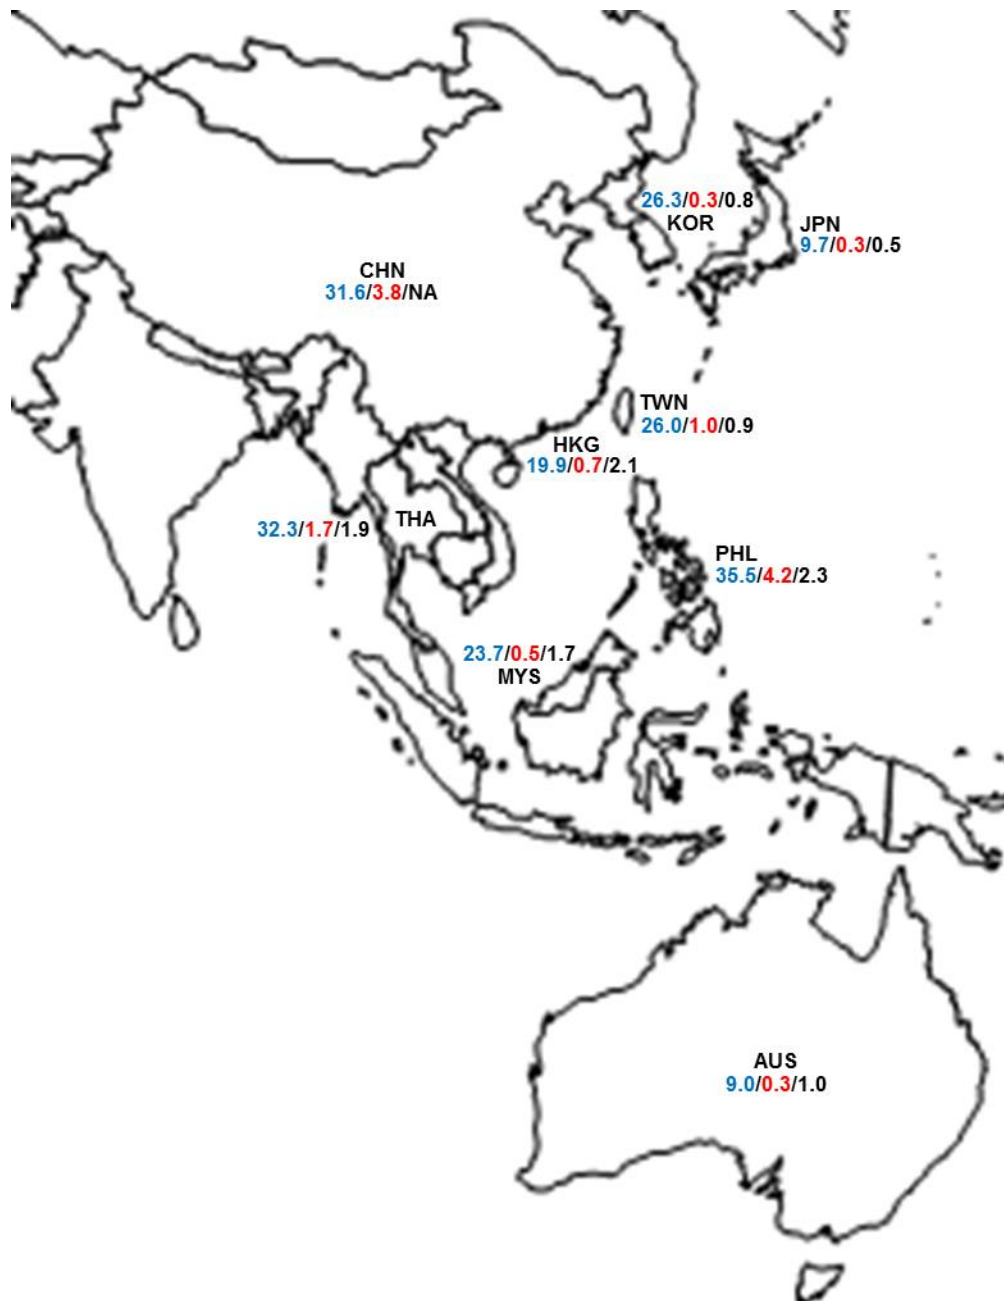

<sup>a</sup>Percentages of collected isolates that were ceftazidime-nonsusceptible (MIC  $\geq 8$   $\mu\text{g/ml}$ ; blue font), meropenem-nonsusceptible (MIC  $\geq 2$   $\mu\text{g/ml}$ , red font), and colistin-resistant (MIC  $\geq 4$   $\mu\text{g/ml}$ , black font) are indicated for each country. Colistin was tested against isolates collected in 2014-2015 only. Country abbreviations were: AUS, Australia; CHN, China; HKG, Hong Kong; JPN, Japan; KOR, South Korea; MYS, Malaysia; PHL, Philippines; TWN, Taiwan; THA,

Thailand. No isolates were obtained from patients in mainland China in 2014–2015 or patients in Hong Kong in 2015 due to export restrictions.

**Figure S3A.** Distribution of genes encoding acquired ESBLs in molecularly characterized isolates of *P. aeruginosa* collected in Asia-Pacific countries

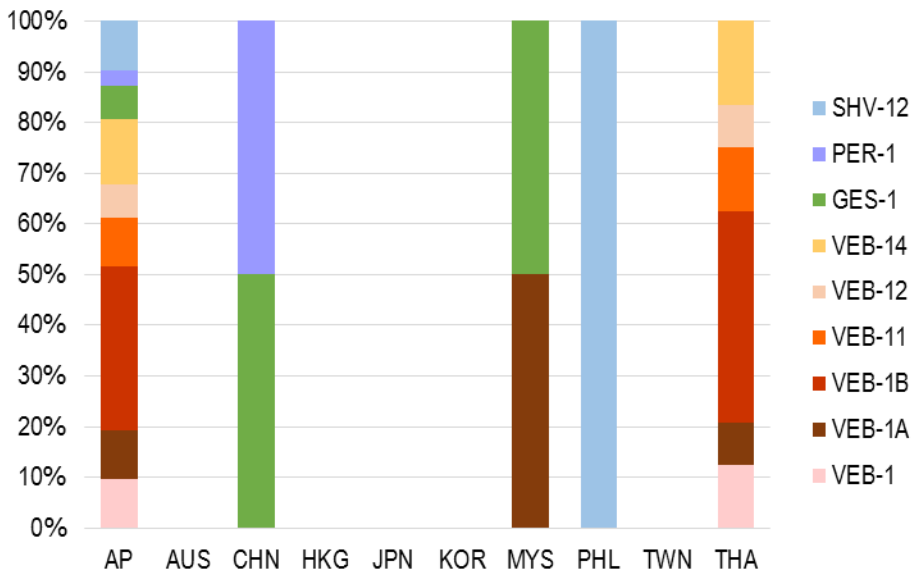

Region/Country (no. of ESBL genes detected | no. of ESBL-producing isolates): AP, Asia-Pacific (31 | 31); AUS, Australia (0 | 0); CHN, China (2 | 2); HKG, Hong Kong (0 | 0); JPN, Japan (0 | 0); KOR, South Korea (0 | 0); MYS, Malaysia (2 | 2); PHL, Philippines (3 | 3); TWN, Taiwan (0 | 0); THA, Thailand (24 | 24). No isolate carried more than one ESBL.

ESBL subtypes identified (total no. of genes): VEB-1B (10), VEB-14 (4), VEB-1 (3), VEB-1A (3), VEB-11 (3), VEB-12 (2), GES-1 (2), PER-1 (1), SHV-12 (3).

**Figure S3B.** Distribution of genes encoding acquired carbapenemases in molecularly characterized isolates of *P. aeruginosa* collected in Asia–Pacific countries.

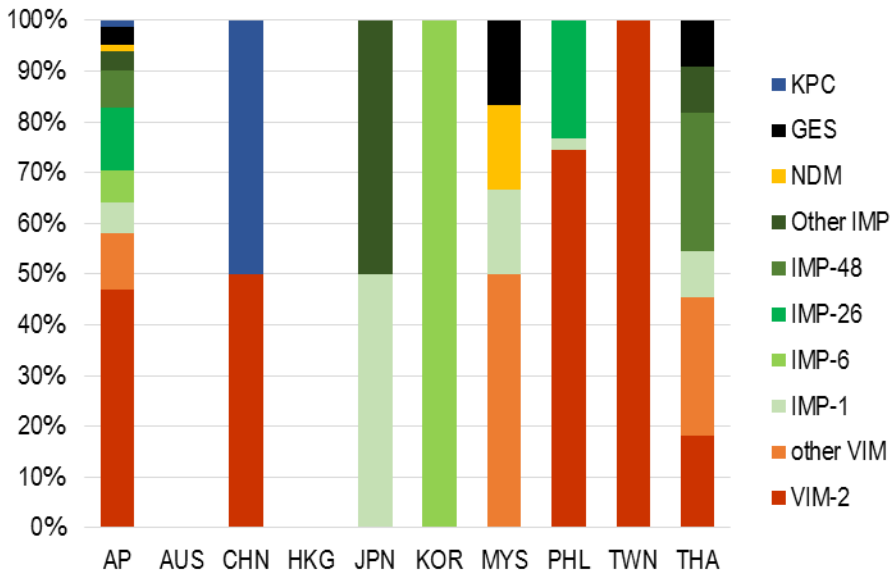

Region/Country (no. of carbapenemase genes detected | no. of carbapenemase–producing isolates): AP, Asia–Pacific (81 | 78); AUS, Australia (0 | 0); CHN, China (2 | 2); HKG, Hong Kong (0 | 0); JPN, Japan (2 | 2); KOR, South Korea (5 | 5); MYS, Malaysia (6 | 6); PHL, Philippines (43 | 40); TWN, Taiwan (1 | 1); THA, Thailand (22 | 22). Some isolates carried more than one carbapenemase.

Carbapenemase subtypes identified (total no. of genes): VIM–2 (38), VIM–6 (3), VIM–5 (2), VIM–45 (2), VIM–49 (2), IMP–26 (10), IMP–48 (6), IMP–1 (5), IMP–6 (5), IMP–7 (2), IMP–14 (1), NDM–1 (1), KPC–2 (1), GES–5 (2), GES–13 (1).



**Figure S3C.** Distribution of genes encoding  $\beta$ -lactamase enzyme types among 632 molecularly characterized carbapenem-nonsusceptible isolates of *P. aeruginosa* collected in Asia-Pacific countries from 2012–2015

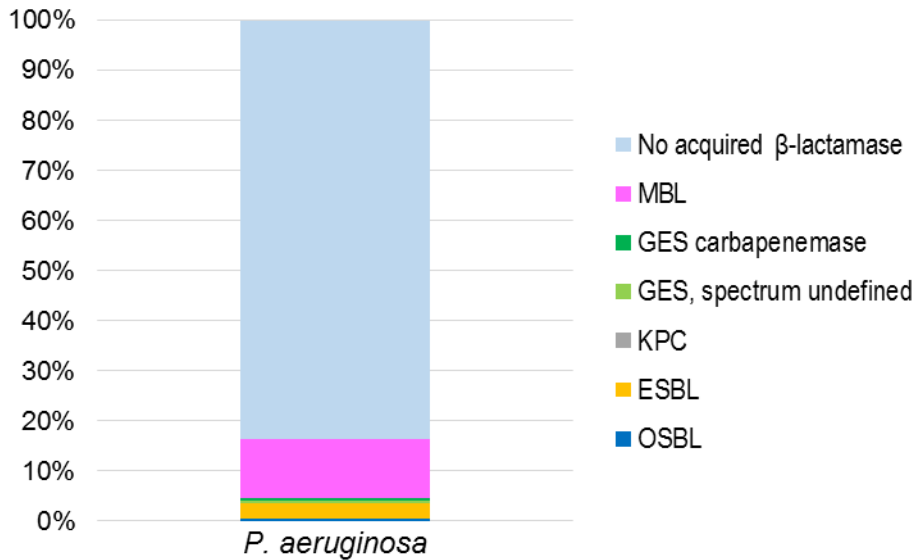

The acquired  $\beta$ -lactamase content of each subset is described in the footnote to Table 2. OSBL, original-spectrum  $\beta$ -lactamase (e.g. TEM-1, SHV-1, SHV-11); ESBL, extended-spectrum  $\beta$ -lactamase; GES, spectrum undefined, enzymes with undefined spectrum of activity (ESBL and/or carbapenemase); MBL, metallo- $\beta$ -lactamase.

**Figure S4.** Percentage of *P. aeruginosa* isolates collected in 2012–2015 with resistant phenotypes, by Asia–Pacific country.<sup>a</sup>

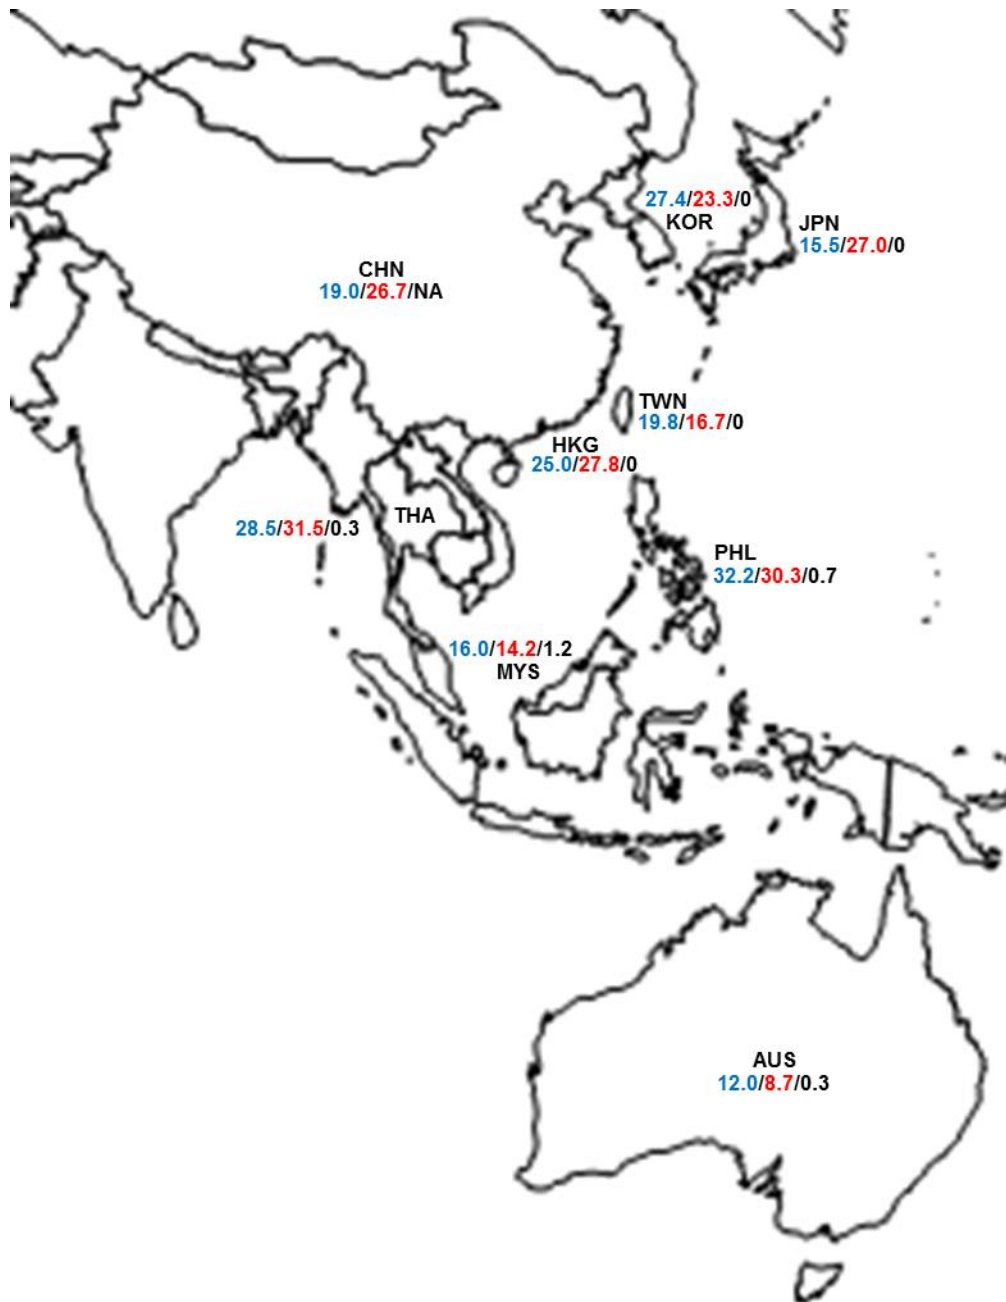

<sup>a</sup>Percentages of collected isolates that were ceftazidime-nonsusceptible (MIC  $\geq 16$   $\mu\text{g/ml}$ ; blue font), meropenem-nonsusceptible (MIC  $\geq 4$   $\mu\text{g/ml}$ , red font), and colistin-resistant (MIC  $\geq 8$   $\mu\text{g/ml}$  [M100–S26, 2016 CLSI MIC resistant breakpoint]; black font) are indicated for each country. Colistin was tested against isolates collected in 2014–2015 only. Country abbreviations were: AUS, Australia; CHN, China; HKG, Hong Kong; JPN, Japan; KOR, South Korea; MYS,

Malaysia; PHL, Philippines; TWN, Taiwan; THA, Thailand. No isolates were obtained from patients in mainland China in 2014–2015 or patients in Hong Kong in 2015 due to export restrictions.

**Supplemental Table S1.** Demographic information associated with the 11,187 Gram-negative bacilli tested by the INFORM global surveillance program from 2012 to 2015

|                                                   | <i>Enterobacteriaceae</i><br>(no. of isolates) | <i>P. aeruginosa</i><br>(no. of isolates) |
|---------------------------------------------------|------------------------------------------------|-------------------------------------------|
| Total no. of isolates                             | 9,149                                          | 2,038                                     |
| Specimen source                                   |                                                |                                           |
| Intra-abdominal                                   | 2,104                                          | 268                                       |
| Urinary tract                                     | 2,661                                          | 296                                       |
| Skin and soft tissue                              | 1,835                                          | 482                                       |
| Lower respiratory tract                           | 2,190                                          | 932                                       |
| Bloodstream                                       | 321                                            | 57                                        |
| Other                                             | 38                                             | 3                                         |
| Country (number of participating medical centers) |                                                |                                           |
| Australia (9)                                     | 1,331                                          | 300                                       |
| China (12) <sup>a</sup>                           | 1,242                                          | 195                                       |
| Hong Kong (1) <sup>b</sup>                        | 146                                            | 36                                        |
| Japan (4)                                         | 783                                            | 174                                       |
| Malaysia (3)                                      | 651                                            | 169                                       |
| Philippines (3)                                   | 1,299                                          | 304                                       |
| South Korea (3)                                   | 1,184                                          | 270                                       |
| Taiwan (3)                                        | 1,247                                          | 288                                       |
| Thailand (4)                                      | 1,266                                          | 302                                       |
| Year of isolation                                 |                                                |                                           |
| 2012                                              | 2,160                                          | 317                                       |
| 2013                                              | 2,849                                          | 443                                       |
| 2014                                              | 2,078                                          | 632                                       |
| 2015                                              | 2,062                                          | 646                                       |

<sup>a</sup> No isolates were obtained from patients in mainland China in 2014-2015 due to export restrictions.

<sup>b</sup> No isolates were obtained from patients in Hong Kong in 2015 due to export restrictions.

**Supplemental Table S2A.** Australia – *In vitro* activities of ceftazidime–avibactam and comparator antimicrobial agents tested against 1,331 isolates of *Enterobacteriaceae* and 300 isolates of *P. aeruginosa* collected as part of the INFORM global surveillance program in 2012–2015.

| Organism, phenotype (no. of isolates) <sup>a</sup> | Antimicrobial agent                    | MIC (µg/ml) <sup>b</sup> |                   |               | % Susceptible <sup>c</sup> |
|----------------------------------------------------|----------------------------------------|--------------------------|-------------------|---------------|----------------------------|
|                                                    |                                        | MIC <sub>50</sub>        | MIC <sub>90</sub> | Range         |                            |
| <i>Enterobacteriaceae</i>                          |                                        |                          |                   |               |                            |
| All (1,331)                                        | Ceftazidime–avibactam                  | 0.12                     | 0.25              | ≤0.015 – 128  | 99.7                       |
|                                                    | Ceftazidime                            | 0.12                     | 2                 | ≤0.015 – >128 | 91.0                       |
|                                                    | Cefepime                               | ≤0.12                    | 0.5               | ≤0.12 – >16   | 93.8                       |
|                                                    | Aztreonam                              | 0.06                     | 4                 | ≤0.015 – >128 | 90.9                       |
|                                                    | Piperacillin–tazobactam                | 2                        | 8                 | ≤0.25 – >128  | 94.5                       |
|                                                    | Doripenem                              | 0.06                     | 0.25              | 0.015 – >4    | 99.2                       |
|                                                    | Imipenem                               | 0.25                     | 2                 | 0.06 – >8     | 84.5                       |
|                                                    | Meropenem                              | 0.03                     | 0.12              | 0.008 – 8     | 99.7                       |
|                                                    | Amikacin                               | 2                        | 4                 | ≤0.25 – >32   | 99.2                       |
|                                                    | Colistin ( <i>n</i> =622) <sup>d</sup> | 1                        | >4                | ≤0.12 – >4    | 82.8                       |
|                                                    | Tigecycline                            | 0.5                      | 2                 | 0.06 – 8      | 94.4                       |
|                                                    | Levofloxacin                           | 0.06                     | 0.5               | ≤0.03 – >4    | 94.5                       |
| All, MBL-negative (1,328)                          | Ceftazidime–avibactam                  | 0.12                     | 0.25              | ≤0.015 – 16   | 99.9                       |
|                                                    | Ceftazidime                            | 0.12                     | 2                 | ≤0.015 – >128 | 91.2                       |
|                                                    | Cefepime                               | ≤0.12                    | 0.5               | ≤0.12 – >16   | 94.0                       |
|                                                    | Aztreonam                              | 0.06                     | 4                 | ≤0.015 – >128 | 91.0                       |
|                                                    | Piperacillin–tazobactam                | 2                        | 8                 | ≤0.25 – >128  | 94.7                       |
|                                                    | Doripenem                              | 0.06                     | 0.25              | 0.015 – >4    | 99.4                       |
|                                                    | Imipenem                               | 0.25                     | 2                 | 0.06 – >8     | 84.6                       |
|                                                    | Meropenem                              | 0.03                     | 0.12              | 0.008 – 2     | 99.9                       |
|                                                    | Amikacin                               | 2                        | 4                 | ≤0.25 – >32   | 99.3                       |
|                                                    | Colistin ( <i>n</i> =621) <sup>d</sup> | 1                        | >4                | ≤0.12 – >4    | 82.8                       |
|                                                    | Tigecycline                            | 0.5                      | 2                 | 0.06 – 8      | 94.4                       |
|                                                    | Levofloxacin                           | 0.06                     | 0.5               | ≤0.03 – >4    | 94.6                       |
| Ceftazidime-nonsusceptible (120)                   | Ceftazidime–avibactam                  | 0.25                     | 1                 | 0.03 – 128    | 96.7                       |
|                                                    | Ceftazidime                            | 32                       | >128              | 8 – >128      | 0                          |
|                                                    | Cefepime                               | 4                        | >16               | ≤0.12 – >16   | 46.7                       |
|                                                    | Aztreonam                              | 32                       | 128               | 0.03 – >128   | 10.8                       |
|                                                    | Piperacillin–tazobactam                | 16                       | >128              | ≤0.25 – >128  | 59.2                       |
|                                                    | Doripenem                              | 0.06                     | 0.25              | 0.015 – >4    | 95.8                       |
|                                                    | Imipenem                               | 0.25                     | 2                 | 0.06 – >8     | 87.5                       |
|                                                    | Meropenem                              | 0.06                     | 0.12              | 0.015 – 8     | 96.7                       |
|                                                    | Amikacin                               | 2                        | 8                 | 0.5 – >32     | 94.2                       |
|                                                    | Colistin ( <i>n</i> =53) <sup>d</sup>  | 1                        | 1                 | ≤0.12 – >4    | 92.5                       |
|                                                    | Tigecycline                            | 0.5                      | 1                 | 0.06 – 4      | 95.8                       |
|                                                    | Levofloxacin                           | 0.5                      | >4                | ≤0.03 – >4    | 62.5                       |
| Ceftazidime-nonsusceptible, MBL-negative (117)     | Ceftazidime–avibactam                  | 0.25                     | 1                 | 0.03 – 16     | 99.2                       |
|                                                    | Ceftazidime                            | 32                       | >128              | 8 – >128      | 0                          |
|                                                    | Cefepime                               | 4                        | >16               | ≤0.12 – >16   | 47.0                       |
|                                                    | Aztreonam                              | 32                       | 128               | 0.03 – >128   | 10.3                       |
|                                                    | Piperacillin–tazobactam                | 16                       | >128              | ≤0.25 – >128  | 59.8                       |
|                                                    | Doripenem                              | 0.06                     | 0.25              | 0.015 – 2     | 98.3                       |
|                                                    | Imipenem                               | 0.25                     | 2                 | 0.06 – 8      | 89.7                       |
|                                                    | Meropenem                              | 0.06                     | 0.12              | 0.015 – 2     | 99.2                       |
|                                                    | Amikacin                               | 2                        | 8                 | 1 – >32       | 94.9                       |
|                                                    | Colistin ( <i>n</i> =52) <sup>d</sup>  | 1                        | 1                 | ≤0.12 – >4    | 92.3                       |
|                                                    | Tigecycline                            | 0.5                      | 1                 | 0.06 – 4      | 96.6                       |
|                                                    | Levofloxacin                           | 0.5                      | >4                | ≤0.03 – >4    | 62.4                       |
| Meropenem-nonsusceptible (4)                       | Ceftazidime–avibactam                  | — <sup>b</sup>           | —                 | 4 – 128       | 25.0                       |

| Organism, phenotype (no. of isolates) <sup>a</sup> | Antimicrobial agent                        | MIC ( $\mu\text{g/ml}$ ) <sup>b</sup> |                   |                 | % Susceptible <sup>c</sup> |      |
|----------------------------------------------------|--------------------------------------------|---------------------------------------|-------------------|-----------------|----------------------------|------|
|                                                    |                                            | MIC <sub>50</sub>                     | MIC <sub>90</sub> | Range           |                            |      |
|                                                    | Ceftazidime                                | —                                     | —                 | 64 – >128       | 0                          |      |
|                                                    | Cefepime                                   | —                                     | —                 | 2 – >16         | 25.0                       |      |
|                                                    | Aztreonam                                  | —                                     | —                 | 0.25 – >128     | 25.0                       |      |
|                                                    | Piperacillin–tazobactam                    | —                                     | —                 | 4 – >128        | 25.0                       |      |
|                                                    | Doripenem                                  | —                                     | —                 | 2 – >4          | 0                          |      |
|                                                    | Imipenem                                   | —                                     | —                 | 0.25 – >8       | 25.0                       |      |
|                                                    | Meropenem                                  | —                                     | —                 | 2 – 8           | 0                          |      |
|                                                    | Amikacin                                   | —                                     | —                 | 0.5 – >32       | 50.0                       |      |
|                                                    | Colistin (n=1) <sup>d</sup>                | —                                     | —                 | 1               | 100                        |      |
|                                                    | Tigecycline                                | —                                     | —                 | 0.5 – 4         | 75.0                       |      |
|                                                    | Levofloxacin                               | —                                     | —                 | 0.5 – >4        | 50.0                       |      |
|                                                    | Meropenem-nonsusceptible, MBL-negative (1) | Ceftazidime–avibactam                 | — <sup>b</sup>    | —               | 4                          | 100  |
|                                                    |                                            | Ceftazidime                           | —                 | —               | >128                       | 0    |
| Cefepime                                           |                                            | —                                     | —                 | >16             | 0                          |      |
| Aztreonam                                          |                                            | —                                     | —                 | >128            | 0                          |      |
| Piperacillin–tazobactam                            |                                            | —                                     | —                 | >128            | 0                          |      |
| Doripenem                                          |                                            | —                                     | —                 | 2               | 0                          |      |
| Imipenem                                           |                                            | —                                     | —                 | 0.25            | 100                        |      |
| Meropenem                                          |                                            | —                                     | —                 | 2               | 0                          |      |
| Amikacin                                           |                                            | —                                     | —                 | >32             | 0                          |      |
| Colistin (n=0) <sup>d</sup>                        |                                            | —                                     | —                 | ND <sup>e</sup> | ND                         |      |
| Tigecycline                                        |                                            | —                                     | —                 | 1               | 100                        |      |
| Levofloxacin                                       |                                            | —                                     | —                 | >4              | 0                          |      |
| Colistin-resistant (13) <sup>f,g</sup>             |                                            | Ceftazidime–avibactam                 | 0.12              | 0.5             | 0.06 – 1                   | 100  |
|                                                    | Ceftazidime                                | 0.25                                  | 32                | 0.12 – 64       | 84.6                       |      |
|                                                    | Cefepime                                   | ≤0.12                                 | 2                 | ≤0.12 – >16     | 92.3                       |      |
|                                                    | Aztreonam                                  | 0.12                                  | 16                | 0.03 – 16       | 84.6                       |      |
|                                                    | Piperacillin–tazobactam                    | 4                                     | 16                | 2 – 16          | 100                        |      |
|                                                    | Doripenem                                  | 0.12                                  | 0.25              | 0.03 – >4       | 92.3                       |      |
|                                                    | Imipenem                                   | 1                                     | 4                 | 0.06 – 4        | 61.5                       |      |
|                                                    | Meropenem                                  | 0.06                                  | 0.12              | 0.03 – 0.25     | 100                        |      |
|                                                    | Amikacin                                   | 1                                     | 4                 | 1 – >32         | 92.3                       |      |
|                                                    | Colistin (n=13) <sup>d</sup>               | >4                                    | >4                | 4 – >4          | 0                          |      |
|                                                    | Tigecycline                                | 0.5                                   | 1                 | 0.12 – 1        | 100                        |      |
|                                                    | Levofloxacin                               | 0.06                                  | 0.12              | ≤0.03 – 0.5     | 100                        |      |
|                                                    | Multidrug-resistant (36)                   | Ceftazidime–avibactam                 | 0.25              | 1               | 0.06 – 32                  | 97.2 |
| Ceftazidime                                        |                                            | 32                                    | >128              | 0.25 – >128     | 2.8                        |      |
| Cefepime                                           |                                            | >16                                   | >16               | 16 – >16        | 0                          |      |
| Aztreonam                                          |                                            | 64                                    | 128               | 0.12 – >128     | 2.8                        |      |
| Piperacillin–tazobactam                            |                                            | 8                                     | >128              | ≤0.25 – >128    | 72.2                       |      |
| Doripenem                                          |                                            | 0.06                                  | 0.25              | 0.015 – >4      | 91.7                       |      |
| Imipenem                                           |                                            | 0.25                                  | 2                 | 0.06 – >8       | 88.9                       |      |
| Meropenem                                          |                                            | 0.06                                  | 0.12              | 0.015 – 2       | 94.4                       |      |
| Amikacin                                           |                                            | 8                                     | 32                | 1 – >32         | 83.3                       |      |
| Colistin (n=19) <sup>d</sup>                       |                                            | 1                                     | 1                 | 0.5 – >4        | 94.7                       |      |
| Tigecycline                                        |                                            | 0.5                                   | 4                 | 0.06 – 4        | 88.9                       |      |
| Levofloxacin                                       |                                            | >4                                    | >4                | 0.06 – >4       | 8.3                        |      |
| Multidrug-resistant, MBL-negative (35)             |                                            | Ceftazidime–avibactam                 | 0.25              | 1               | 0.06 – 4                   | 100  |
|                                                    | Ceftazidime                                | 32                                    | >128              | 0.25 – >128     | 2.9                        |      |
|                                                    | Cefepime                                   | >16                                   | >16               | 16 – >16        | 0                          |      |
|                                                    | Aztreonam                                  | 64                                    | 128               | 0.12 – >128     | 2.9                        |      |
|                                                    | Piperacillin–tazobactam                    | 8                                     | >128              | ≤0.25 – >128    | 74.3                       |      |
|                                                    | Doripenem                                  | 0.06                                  | 0.25              | 0.015 – >4      | 94.3                       |      |
|                                                    | Imipenem                                   | 0.25                                  | 1                 | 0.06 – 4        | 91.4                       |      |
|                                                    | Meropenem                                  | 0.06                                  | 0.12              | 0.015 – 2       | 97.1                       |      |
|                                                    | Amikacin                                   | 8                                     | 32                | 1 – >32         | 85.7                       |      |
|                                                    | Colistin (n=19) <sup>d</sup>               | 1                                     | 1                 | 0.5 – >4        | 94.7                       |      |
|                                                    | Tigecycline                                | 0.5                                   | 2                 | 0.06 – 4        | 91.4                       |      |
|                                                    | Levofloxacin                               | >4                                    | >4                | 0.06 – >4       | 8.6                        |      |

| Organism, phenotype (no. of isolates) <sup>a</sup> | Antimicrobial agent               | MIC ( $\mu\text{g/ml}$ ) <sup>b</sup> |                   |                     | % Susceptible <sup>c</sup> |      |
|----------------------------------------------------|-----------------------------------|---------------------------------------|-------------------|---------------------|----------------------------|------|
|                                                    |                                   | MIC <sub>50</sub>                     | MIC <sub>90</sub> | Range               |                            |      |
| <i>Escherichia coli</i> <sup>b</sup>               |                                   |                                       |                   |                     |                            |      |
| All (433)                                          | Ceftazidime–avibactam             | 0.12                                  | 0.25              | $\leq 0.015 - 1$    | 100                        |      |
|                                                    | Ceftazidime                       | 0.12                                  | 8                 | $0.03 - >128$       | 89.4                       |      |
|                                                    | Cefepime                          | $\leq 0.12$                           | 4                 | $\leq 0.12 - >16$   | 89.2                       |      |
|                                                    | Aztreonam                         | 0.12                                  | 8                 | $\leq 0.015 - 128$  | 88.7                       |      |
|                                                    | Piperacillin–tazobactam           | 2                                     | 8                 | $\leq 0.25 - >128$  | 96.5                       |      |
|                                                    | Doripenem                         | 0.03                                  | 0.06              | $0.015 - 0.25$      | 100                        |      |
|                                                    | Imipenem                          | 0.12                                  | 0.25              | $0.06 - 2$          | 99.8                       |      |
|                                                    | Meropenem                         | 0.03                                  | 0.03              | $0.008 - 0.12$      | 100                        |      |
|                                                    | Amikacin                          | 2                                     | 4                 | $0.5 - >32$         | 99.3                       |      |
|                                                    | Colistin ( $n=205$ ) <sup>d</sup> | 0.5                                   | 1                 | $\leq 0.12 - >4$    | 99.5                       |      |
|                                                    | Tigecycline                       | 0.25                                  | 0.5               | $0.06 - 1$          | 100                        |      |
|                                                    | Levofloxacin                      | 0.03                                  | $>4$              | $\leq 0.03 - >4$    | 88.7                       |      |
|                                                    | Ceftazidime-nonsusceptible (46)   | Ceftazidime–avibactam                 | 0.25              | 0.25                | $0.03 - 0.5$               | 100  |
|                                                    |                                   | Ceftazidime                           | 32                | 64                  | $8 - >128$                 | 0    |
| Cefepime                                           |                                   | $>16$                                 | $>16$             | $\leq 0.12 - >16$   | 21.7                       |      |
| Aztreonam                                          |                                   | 32                                    | 64                | $2 - 128$           | 6.5                        |      |
| Piperacillin–tazobactam                            |                                   | 4                                     | 16                | $1 - >128$          | 91.3                       |      |
| Doripenem                                          |                                   | 0.06                                  | 0.06              | $0.015 - 0.25$      | 100                        |      |
| Imipenem                                           |                                   | 0.25                                  | 0.5               | $0.06 - 2$          | 97.8                       |      |
| Meropenem                                          |                                   | 0.03                                  | 0.06              | $0.015 - 0.12$      | 100                        |      |
| Amikacin                                           |                                   | 4                                     | 16                | $1 - >32$           | 93.5                       |      |
| Colistin ( $n=22$ ) <sup>d</sup>                   |                                   | 0.5                                   | 1                 | $\leq 0.12 - 1$     | 100                        |      |
| Tigecycline                                        |                                   | 0.25                                  | 0.5               | $0.06 - 1$          | 100                        |      |
| Levofloxacin                                       |                                   | $>4$                                  | $>4$              | $\leq 0.03 - >4$    | 32.6                       |      |
| Colistin-resistant (1)                             |                                   | Ceftazidime–avibactam                 | — <sup>b</sup>    | —                   | 0.12                       | 100  |
|                                                    |                                   | Ceftazidime                           | —                 | —                   | 0.12                       | 100  |
|                                                    | Cefepime                          | —                                     | —                 | $\leq 0.12$         | 100                        |      |
|                                                    | Aztreonam                         | —                                     | —                 | 0.12                | 100                        |      |
|                                                    | Piperacillin–tazobactam           | —                                     | —                 | 8                   | 100                        |      |
|                                                    | Doripenem                         | —                                     | —                 | 0.12                | 100                        |      |
|                                                    | Imipenem                          | —                                     | —                 | 0.25                | 100                        |      |
|                                                    | Meropenem                         | —                                     | —                 | 0.03                | 100                        |      |
|                                                    | Amikacin                          | —                                     | —                 | 4                   | 100                        |      |
|                                                    | Colistin ( $n=1$ ) <sup>d</sup>   | —                                     | —                 | $>4$                | 0                          |      |
|                                                    | Tigecycline                       | —                                     | —                 | 0.25                | 100                        |      |
|                                                    | Levofloxacin                      | —                                     | —                 | $\leq 0.03$         | 100                        |      |
|                                                    | Multidrug-resistant (23)          | Ceftazidime–avibactam                 | 0.25              | 0.5                 | $0.06 - 0.5$               | 100  |
|                                                    |                                   | Ceftazidime                           | 32                | 64                  | $8 - >128$                 | 0    |
| Cefepime                                           |                                   | $>16$                                 | $>16$             | $16 - >16$          | 0                          |      |
| Aztreonam                                          |                                   | 64                                    | 64                | $16 - 128$          | 0                          |      |
| Piperacillin–tazobactam                            |                                   | 4                                     | 16                | $1 - 128$           | 95.7                       |      |
| Doripenem                                          |                                   | 0.06                                  | 0.06              | $0.015 - 0.12$      | 100                        |      |
| Imipenem                                           |                                   | 0.12                                  | 0.25              | $0.06 - 0.25$       | 100                        |      |
| Meropenem                                          |                                   | 0.03                                  | 0.06              | $0.015 - 0.12$      | 100                        |      |
| Amikacin                                           |                                   | 4                                     | 16                | $2 - 32$            | 95.7                       |      |
| Colistin ( $n=12$ ) <sup>d</sup>                   |                                   | 0.5                                   | 1                 | $0.5 - 1$           | 100                        |      |
| Tigecycline                                        |                                   | 0.25                                  | 0.5               | $0.06 - 0.5$        | 100                        |      |
| Levofloxacin                                       |                                   | $>4$                                  | $>4$              | $>4 - >4$           | 0                          |      |
| <i>Klebsiella pneumoniae</i>                       |                                   |                                       |                   |                     |                            |      |
| All (347)                                          |                                   | Ceftazidime–avibactam                 | 0.12              | 0.25                | $0.03 - 128$               | 99.7 |
|                                                    | Ceftazidime                       | 0.12                                  | 0.5               | $0.06 - >128$       | 95.4                       |      |
|                                                    | Cefepime                          | $\leq 0.12$                           | 0.25              | $\leq 0.12 - >16$   | 95.4                       |      |
|                                                    | Aztreonam                         | 0.06                                  | 0.25              | $\leq 0.015 - >128$ | 95.7                       |      |
|                                                    | Piperacillin–tazobactam           | 4                                     | 8                 | $\leq 0.25 - >128$  | 95.1                       |      |
|                                                    | Doripenem                         | 0.06                                  | 0.12              | $0.03 - >4$         | 99.1                       |      |
|                                                    | Imipenem                          | 0.25                                  | 0.5               | $0.06 - 8$          | 98.6                       |      |
|                                                    | Meropenem                         | 0.03                                  | 0.06              | $0.015 - 8$         | 99.4                       |      |
|                                                    | Amikacin                          | 1                                     | 2                 | $\leq 0.25 - >32$   | 99.1                       |      |
|                                                    | Colistin ( $n=173$ ) <sup>d</sup> | 1                                     | 1                 | $0.25 - >4$         | 97.7                       |      |

| Organism, phenotype (no. of isolates) <sup>a</sup> | Antimicrobial agent               | MIC ( $\mu\text{g/ml}$ ) <sup>b</sup> |                   |                       | % Susceptible <sup>c</sup> |
|----------------------------------------------------|-----------------------------------|---------------------------------------|-------------------|-----------------------|----------------------------|
|                                                    |                                   | MIC <sub>50</sub>                     | MIC <sub>90</sub> | Range                 |                            |
| All, MBL-negative (346)                            | Tigecycline                       | 0.5                                   | 1                 | 0.06 – 4              | 99.1                       |
|                                                    | Levofloxacin                      | 0.06                                  | 0.5               | $\leq 0.03$ – $>4$    | 96.3                       |
|                                                    | Ceftazidime–avibactam             | 0.12                                  | 0.25              | 0.03 – 4              | 100                        |
|                                                    | Ceftazidime                       | 0.12                                  | 0.5               | 0.06 – $>128$         | 95.7                       |
|                                                    | Cefepime                          | $\leq 0.12$                           | 0.25              | $\leq 0.12$ – $>16$   | 95.7                       |
|                                                    | Aztreonam                         | 0.06                                  | 0.25              | $\leq 0.015$ – $>128$ | 95.7                       |
|                                                    | Piperacillin–tazobactam           | 4                                     | 8                 | $\leq 0.25$ – $>128$  | 95.4                       |
|                                                    | Doripenem                         | 0.06                                  | 0.12              | 0.03 – $>4$           | 99.4                       |
|                                                    | Imipenem                          | 0.25                                  | 0.5               | 0.06 – 4              | 98.8                       |
|                                                    | Meropenem                         | 0.03                                  | 0.06              | 0.015 – 2             | 99.7                       |
| Ceftazidime-nonsusceptible (16)                    | Amikacin                          | 1                                     | 2                 | $\leq 0.25$ – $>32$   | 99.1                       |
|                                                    | Colistin ( $n=173$ ) <sup>d</sup> | 1                                     | 1                 | 0.25 – $>4$           | 99.7                       |
|                                                    | Tigecycline                       | 0.5                                   | 1                 | 0.06 – 4              | 99.1                       |
|                                                    | Levofloxacin                      | 0.06                                  | 0.25              | $\leq 0.03$ – $>4$    | 96.2                       |
|                                                    | Ceftazidime–avibactam             | 0.5                                   | 4                 | 0.12 – 128            | 93.8                       |
|                                                    | Ceftazidime                       | 64                                    | $>128$            | 16 – $>128$           | 0                          |
|                                                    | Cefepime                          | 16                                    | $>16$             | $\leq 0.12$ – $>16$   | 18.8                       |
|                                                    | Aztreonam                         | 64                                    | $>128$            | 0.25 – $>128$         | 12.5                       |
|                                                    | Piperacillin–tazobactam           | 32                                    | $>128$            | 2 – $>128$            | 37.5                       |
|                                                    | Doripenem                         | 0.06                                  | 2                 | 0.03 – $>4$           | 87.5                       |
| Ceftazidime-nonsusceptible, MBL-negative (15)      | Imipenem                          | 0.25                                  | 1                 | 0.12 – 8              | 93.8                       |
|                                                    | Meropenem                         | 0.06                                  | 2                 | 0.03 – 8              | 87.5                       |
|                                                    | Amikacin                          | 2                                     | 8                 | 1 – $>32$             | 93.8                       |
|                                                    | Colistin ( $n=6$ ) <sup>d</sup>   | — <sup>b</sup>                        | —                 | 1 – 1                 | 100                        |
|                                                    | Tigecycline                       | 1                                     | 2                 | 0.25 – 4              | 93.8                       |
|                                                    | Levofloxacin                      | 2                                     | $>4$              | 0.06 – $>4$           | 50.0                       |
|                                                    | Ceftazidime–avibactam             | 0.5                                   | 1                 | 0.12 – 4              | 100                        |
|                                                    | Ceftazidime                       | 64                                    | $>128$            | 16 – $>128$           | 0                          |
|                                                    | Cefepime                          | 16                                    | $>16$             | $\leq 0.12$ – $>16$   | 20.0                       |
|                                                    | Aztreonam                         | 64                                    | $>128$            | 2 – $>128$            | 6.7                        |
| Meropenem-nonsusceptible (2)                       | Piperacillin–tazobactam           | 32                                    | $>128$            | 2 – $>128$            | 40.0                       |
|                                                    | Doripenem                         | 0.06                                  | 0.25              | 0.03 – 2              | 93.3                       |
|                                                    | Imipenem                          | 0.25                                  | 1                 | 0.12 – 1              | 100                        |
|                                                    | Meropenem                         | 0.06                                  | 0.12              | 0.03 – 2              | 93.3                       |
|                                                    | Amikacin                          | 4                                     | 8                 | 1 – $>32$             | 93.3                       |
|                                                    | Colistin ( $n=6$ ) <sup>d</sup>   | 1                                     | 1                 | 1 – 1                 | 100                        |
|                                                    | Tigecycline                       | 1                                     | 2                 | 0.25 – 4              | 93.3                       |
|                                                    | Levofloxacin                      | $>4$                                  | $>4$              | 0.06 – $>4$           | 46.7                       |
|                                                    | Ceftazidime–avibactam             | — <sup>b</sup>                        | —                 | 4 – 128               | 50.0                       |
|                                                    | Ceftazidime                       | —                                     | —                 | $>128$ – $>128$       | 0                          |
| Cefepime                                           | —                                 | —                                     | $>16$ – $>16$     | 0                     |                            |
| Aztreonam                                          | —                                 | —                                     | 0.25 – $>128$     | 50.0                  |                            |
| Meropenem-nonsusceptible, MBL-negative (1)         | Piperacillin–tazobactam           | —                                     | —                 | 32 – $>128$           | 0                          |
|                                                    | Doripenem                         | —                                     | —                 | 2 – $>4$              | 0                          |
|                                                    | Imipenem                          | —                                     | —                 | 0.25 – 8              | 50.0                       |
|                                                    | Meropenem                         | —                                     | —                 | 2 – 8                 | 0                          |
|                                                    | Amikacin                          | —                                     | —                 | 2 – $>32$             | 50.0                       |
|                                                    | Colistin ( $n=0$ ) <sup>d</sup>   | —                                     | —                 | ND <sup>e</sup>       | ND                         |
|                                                    | Tigecycline                       | —                                     | —                 | 1 – 1                 | 100                        |
|                                                    | Levofloxacin                      | —                                     | —                 | 0.5 – $>4$            | 50.0                       |
|                                                    | Ceftazidime–avibactam             | — <sup>b</sup>                        | —                 | 4                     | 100                        |
|                                                    | Ceftazidime                       | —                                     | —                 | $>128$                | 0                          |
| Cefepime                                           | —                                 | —                                     | $>16$             | 0                     |                            |
| Aztreonam                                          | —                                 | —                                     | $>128$            | 0                     |                            |
| Meropenem-nonsusceptible, MBL-negative (1)         | Piperacillin–tazobactam           | —                                     | —                 | $>128$                | 0                          |
|                                                    | Doripenem                         | —                                     | —                 | 2                     | 0                          |
|                                                    | Imipenem                          | —                                     | —                 | 0.25                  | 100                        |
|                                                    | Meropenem                         | —                                     | —                 | 2                     | 0                          |
|                                                    | Amikacin                          | —                                     | —                 | $>32$                 | 0                          |



| Organism, phenotype (no. of isolates) <sup>a</sup> | Antimicrobial agent          | MIC ( $\mu\text{g/ml}$ ) <sup>b</sup> |                   |                 | % Susceptible <sup>c</sup> |
|----------------------------------------------------|------------------------------|---------------------------------------|-------------------|-----------------|----------------------------|
|                                                    |                              | MIC <sub>50</sub>                     | MIC <sub>90</sub> | Range           |                            |
|                                                    | Colistin (n=0) <sup>d</sup>  | —                                     | —                 | ND <sup>e</sup> | ND                         |
|                                                    | Tigecycline                  | —                                     | —                 | 1               | 100                        |
|                                                    | Levofloxacin                 | —                                     | —                 | >4              | 0                          |
| Colistin-resistant (4) <sup>g</sup>                | Ceftazidime–avibactam        | — <sup>b</sup>                        | —                 | 0.12 – 0.25     | 100                        |
|                                                    | Ceftazidime                  | —                                     | —                 | 0.12 – 0.25     | 100                        |
|                                                    | Cefepime                     | —                                     | —                 | ≤0.12 – >16     | 75.0                       |
|                                                    | Aztreonam                    | —                                     | —                 | 0.06 – 0.12     | 100                        |
|                                                    | Piperacillin–tazobactam      | —                                     | —                 | 2 – 4           | 100                        |
|                                                    | Doripenem                    | —                                     | —                 | 0.03 – >4       | 75.0                       |
|                                                    | Imipenem                     | —                                     | —                 | 0.06 – 4        | 75.0                       |
|                                                    | Meropenem                    | —                                     | —                 | 0.03 – 0.06     | 100                        |
|                                                    | Amikacin                     | —                                     | —                 | 1 – >32         | 75.0                       |
|                                                    | Colistin (n=4) <sup>d</sup>  | —                                     | —                 | 4 – >4          | 0                          |
|                                                    | Tigecycline                  | —                                     | —                 | 0.12 – 0.5      | 100                        |
|                                                    | Levofloxacin                 | —                                     | —                 | 0.06 – 0.12     | 100                        |
| Multidrug-resistant (9) <sup>g</sup>               | Ceftazidime–avibactam        | — <sup>b</sup>                        | —                 | 0.25 – 4        | 100                        |
|                                                    | Ceftazidime                  | —                                     | —                 | 0.25 – >128     | 11.1                       |
|                                                    | Cefepime                     | —                                     | —                 | 16 – >16        | 0                          |
|                                                    | Aztreonam                    | —                                     | —                 | 0.12 – >128     | 11.1                       |
|                                                    | Piperacillin–tazobactam      | —                                     | —                 | 4 – >128        | 22.2                       |
|                                                    | Doripenem                    | —                                     | —                 | 0.03 – >4       | 77.8                       |
|                                                    | Imipenem                     | —                                     | —                 | 0.12 – 4        | 88.9                       |
|                                                    | Meropenem                    | —                                     | —                 | 0.03 – 2        | 88.9                       |
|                                                    | Amikacin                     | —                                     | —                 | 1 – >32         | 77.8                       |
|                                                    | Colistin (n=7) <sup>d</sup>  | —                                     | —                 | 1 – >4          | 85.7                       |
|                                                    | Tigecycline                  | —                                     | —                 | 0.5 – 4         | 88.9                       |
|                                                    | Levofloxacin                 | —                                     | —                 | 0.06 – >4       | 22.2                       |
| <i>Klebsiella oxytoca</i>                          |                              |                                       |                   |                 |                            |
| All (82)                                           | Ceftazidime–avibactam        | 0.12                                  | 0.25              | ≤0.015 – 64     | 98.8                       |
|                                                    | Ceftazidime                  | 0.12                                  | 0.5               | ≤0.015 – 64     | 98.8                       |
|                                                    | Cefepime                     | ≤0.12                                 | 0.25              | ≤0.12 – 4       | 98.8                       |
|                                                    | Aztreonam                    | 0.12                                  | 1                 | ≤0.015 – 64     | 92.7                       |
|                                                    | Piperacillin–tazobactam      | 2                                     | 4                 | ≤0.25 – >128    | 93.9                       |
|                                                    | Doripenem                    | 0.06                                  | 0.12              | 0.03 – 2        | 98.8                       |
|                                                    | Imipenem                     | 0.25                                  | 0.5               | 0.06 – 2        | 98.8                       |
|                                                    | Meropenem                    | 0.03                                  | 0.06              | 0.015 – 4       | 98.8                       |
|                                                    | Amikacin                     | 1                                     | 2                 | 0.5 – 8         | 100                        |
|                                                    | Colistin (n=35) <sup>d</sup> | 1                                     | 1                 | 0.5 – 2         | 100                        |
|                                                    | Tigecycline                  | 0.25                                  | 0.5               | 0.06 – 2        | 100                        |
|                                                    | Levofloxacin                 | 0.06                                  | 0.06              | ≤0.03 – 2       | 100                        |
| All, MBL-negative (81)                             | Ceftazidime–avibactam        | 0.12                                  | 0.25              | ≤0.015 – 0.5    | 100                        |
|                                                    | Ceftazidime                  | 0.12                                  | 0.5               | ≤0.015 – 2      | 100                        |
|                                                    | Cefepime                     | ≤0.12                                 | 0.25              | ≤0.12 – 4       | 98.8                       |
|                                                    | Aztreonam                    | 0.12                                  | 0.5               | ≤0.015 – 64     | 93.8                       |
|                                                    | Piperacillin–tazobactam      | 2                                     | 4                 | ≤0.25 – >128    | 93.8                       |
|                                                    | Doripenem                    | 0.06                                  | 0.12              | 0.03 – 0.12     | 100                        |
|                                                    | Imipenem                     | 0.25                                  | 0.5               | 0.06 – 1        | 100                        |
|                                                    | Meropenem                    | 0.03                                  | 0.06              | 0.015 – 0.12    | 100                        |
|                                                    | Amikacin                     | 1                                     | 2                 | 0.5 – 8         | 100                        |
|                                                    | Colistin (n=34) <sup>d</sup> | 1                                     | 1                 | 0.5 – 2         | 100                        |
|                                                    | Tigecycline                  | 0.25                                  | 0.5               | 0.06 – 2        | 100                        |
|                                                    | Levofloxacin                 | 0.06                                  | 0.06              | ≤0.03 – 2       | 100                        |
| Ceftazidime-nonsusceptible (1) <sup>h</sup>        | Ceftazidime–avibactam        | — <sup>b</sup>                        | —                 | 64              | 0                          |
|                                                    | Ceftazidime                  | —                                     | —                 | 64              | 0                          |
|                                                    | Cefepime                     | —                                     | —                 | 2               | 100                        |
|                                                    | Aztreonam                    | —                                     | —                 | 32              | 0                          |
|                                                    | Piperacillin–tazobactam      | —                                     | —                 | 4               | 100                        |
|                                                    | Doripenem                    | —                                     | —                 | 2               | 0                          |
|                                                    | Imipenem                     | —                                     | —                 | 2               | 0                          |

| Organism, phenotype (no. of isolates) <sup>a</sup> | Antimicrobial agent              | MIC ( $\mu\text{g/ml}$ ) <sup>b</sup> |                   |               | % Susceptible <sup>c</sup> |
|----------------------------------------------------|----------------------------------|---------------------------------------|-------------------|---------------|----------------------------|
|                                                    |                                  | MIC <sub>50</sub>                     | MIC <sub>90</sub> | Range         |                            |
|                                                    | Meropenem                        | —                                     | —                 | 4             | 0                          |
|                                                    | Amikacin                         | —                                     | —                 | 0.5           | 100                        |
|                                                    | Colistin ( $n=1$ ) <sup>d</sup>  | —                                     | —                 | 1             | 100                        |
|                                                    | Tigecycline                      | —                                     | —                 | 0.5           | 100                        |
|                                                    | Levofloxacin                     | —                                     | —                 | 1             | 100                        |
| Meropenem-nonsusceptible (1) <sup>h</sup>          | Ceftazidime–avibactam            | — <sup>b</sup>                        | —                 | 64            | 0                          |
|                                                    | Ceftazidime                      | —                                     | —                 | 64            | 0                          |
|                                                    | Cefepime                         | —                                     | —                 | 2             | 100                        |
|                                                    | Aztreonam                        | —                                     | —                 | 32            | 0                          |
|                                                    | Piperacillin–tazobactam          | —                                     | —                 | 4             | 100                        |
|                                                    | Doripenem                        | —                                     | —                 | 2             | 0                          |
|                                                    | Imipenem                         | —                                     | —                 | 2             | 0                          |
|                                                    | Meropenem                        | —                                     | —                 | 4             | 0                          |
|                                                    | Amikacin                         | —                                     | —                 | 0.5           | 100                        |
|                                                    | Colistin ( $n=1$ ) <sup>d</sup>  | —                                     | —                 | 1             | 100                        |
|                                                    | Tigecycline                      | —                                     | —                 | 0.5           | 100                        |
|                                                    | Levofloxacin                     | —                                     | —                 | 1             | 100                        |
| <i>Enterobacter</i> spp. <sup>g</sup>              |                                  |                                       |                   |               |                            |
| All (163) <sup>i</sup>                             | Ceftazidime–avibactam            | 0.25                                  | 0.5               | 0.03 – 1      | 100                        |
|                                                    | Ceftazidime                      | 0.25                                  | 64                | 0.03 – >128   | 76.1                       |
|                                                    | Cefepime                         | ≤0.12                                 | 2                 | ≤0.12 – >16   | 92.6                       |
|                                                    | Aztreonam                        | 0.12                                  | 32                | ≤0.015 – >128 | 78.5                       |
|                                                    | Piperacillin–tazobactam          | 4                                     | 64                | ≤0.25 – >128  | 84.1                       |
|                                                    | Doripenem                        | 0.06                                  | 0.25              | 0.015 – 1     | 100                        |
|                                                    | Imipenem                         | 1                                     | 2                 | 0.06 – >8     | 77.9                       |
|                                                    | Meropenem                        | 0.06                                  | 0.12              | 0.015 – 1     | 100                        |
|                                                    | Amikacin                         | 1                                     | 2                 | ≤0.25 – 8     | 100                        |
|                                                    | Colistin ( $n=70$ ) <sup>d</sup> | 1                                     | 4                 | 0.25 – >4     | 88.6                       |
|                                                    | Tigecycline                      | 0.5                                   | 1                 | 0.06 – 4      | 98.8                       |
|                                                    | Levofloxacin                     | 0.06                                  | 0.12              | ≤0.03 – 4     | 99.4                       |
| Ceftazidime-nonsusceptible (39)                    | Ceftazidime–avibactam            | 0.5                                   | 1                 | 0.12 – 1      | 100                        |
|                                                    | Ceftazidime                      | 64                                    | >128              | 8 – >128      | 0                          |
|                                                    | Cefepime                         | 1                                     | 8                 | ≤0.12 – >16   | 69.2                       |
|                                                    | Aztreonam                        | 32                                    | 128               | 1 – >128      | 10.3                       |
|                                                    | Piperacillin–tazobactam          | 64                                    | >128              | 4 – >128      | 35.9                       |
|                                                    | Doripenem                        | 0.12                                  | 0.25              | 0.06 – 0.5    | 100                        |
|                                                    | Imipenem                         | 0.5                                   | 2                 | 0.25 – 4      | 89.7                       |
|                                                    | Meropenem                        | 0.12                                  | 0.25              | 0.06 – 0.5    | 100                        |
|                                                    | Amikacin                         | 1                                     | 4                 | 1 – 8         | 100                        |
|                                                    | Colistin ( $n=14$ ) <sup>d</sup> | 1                                     | 4                 | 0.25 – >4     | 85.7                       |
|                                                    | Tigecycline                      | 0.5                                   | 1                 | 0.25 – 4      | 97.4                       |
|                                                    | Levofloxacin                     | 0.06                                  | 1                 | ≤0.03 – 4     | 97.4                       |
| Colistin-resistant (8)                             | Ceftazidime–avibactam            | — <sup>b</sup>                        | —                 | 0.06 – 1      | 100                        |
|                                                    | Ceftazidime                      | —                                     | —                 | 0.12 – 64     | 75.0                       |
|                                                    | Cefepime                         | —                                     | —                 | ≤0.12 – 2     | 100                        |
|                                                    | Aztreonam                        | —                                     | —                 | 0.03 – 16     | 75.0                       |
|                                                    | Piperacillin–tazobactam          | —                                     | —                 | 2 – 16        | 100                        |
|                                                    | Doripenem                        | —                                     | —                 | 0.06 – 0.25   | 100                        |
|                                                    | Imipenem                         | —                                     | —                 | 0.25 – 4      | 50.0                       |
|                                                    | Meropenem                        | —                                     | —                 | 0.03 – 0.25   | 100                        |
|                                                    | Amikacin                         | —                                     | —                 | 1 – 2         | 100                        |
|                                                    | Colistin ( $n=8$ ) <sup>d</sup>  | —                                     | —                 | 4 – >4        | 0                          |
|                                                    | Tigecycline                      | —                                     | —                 | 0.5 – 1       | 100                        |
|                                                    | Levofloxacin                     | —                                     | —                 | ≤0.03 – 0.5   | 100                        |
| Multidrug-resistant (1)                            | Ceftazidime–avibactam            | — <sup>b</sup>                        | —                 | 1             | 100                        |
|                                                    | Ceftazidime                      | —                                     | —                 | >128          | 0                          |
|                                                    | Cefepime                         | —                                     | —                 | 16            | 0                          |
|                                                    | Aztreonam                        | —                                     | —                 | >128          | 0                          |
|                                                    | Piperacillin–tazobactam          | —                                     | —                 | >128          | 0                          |

| Organism, phenotype (no. of isolates) <sup>a</sup> | Antimicrobial agent          | MIC ( $\mu\text{g/ml}$ ) <sup>b</sup> |                   |                 | % Susceptible <sup>c</sup> |
|----------------------------------------------------|------------------------------|---------------------------------------|-------------------|-----------------|----------------------------|
|                                                    |                              | MIC <sub>50</sub>                     | MIC <sub>90</sub> | Range           |                            |
|                                                    | Doripenem                    | —                                     | —                 | 0.12            | 100                        |
|                                                    | Imipenem                     | —                                     | —                 | 0.5             | 100                        |
|                                                    | Meropenem                    | —                                     | —                 | 0.25            | 100                        |
|                                                    | Amikacin                     | —                                     | —                 | 1               | 100                        |
|                                                    | Colistin (n=0) <sup>d</sup>  | —                                     | —                 | ND <sup>e</sup> | ND                         |
|                                                    | Tigecycline                  | —                                     | —                 | 2               | 100                        |
|                                                    | Levofloxacin                 | —                                     | —                 | 2               | 100                        |
| <i>Citrobacter</i> spp. <sup>g</sup>               |                              |                                       |                   |                 |                            |
| All (93) <sup>j</sup>                              | Ceftazidime–avibactam        | 0.12                                  | 0.5               | 0.03 – 0.5      | 100                        |
|                                                    | Ceftazidime                  | 0.25                                  | 64                | 0.06 – >128     | 87.1                       |
|                                                    | Cefepime                     | ≤0.12                                 | 1                 | ≤0.12 – 4       | 97.9                       |
|                                                    | Aztreonam                    | 0.12                                  | 16                | ≤0.015 – 128    | 88.2                       |
|                                                    | Piperacillin–tazobactam      | 2                                     | 16                | 1 – >128        | 90.3                       |
|                                                    | Doripenem                    | 0.06                                  | 0.06              | 0.03 – 0.12     | 100                        |
|                                                    | Imipenem                     | 0.25                                  | 2                 | 0.06 – 4        | 89.3                       |
|                                                    | Meropenem                    | 0.03                                  | 0.06              | 0.015 – 0.25    | 100                        |
|                                                    | Amikacin                     | 2                                     | 4                 | ≤0.25 – 16      | 100                        |
|                                                    | Colistin (n=43) <sup>d</sup> | 1                                     | 1                 | 0.25 – 2        | 100                        |
|                                                    | Tigecycline                  | 0.25                                  | 0.5               | 0.06 – 1        | 100                        |
|                                                    | Levofloxacin                 | 0.06                                  | 0.5               | ≤0.03 – >4      | 97.9                       |
| Ceftazidime-nonsusceptible (12)                    | Ceftazidime–avibactam        | 0.5                                   | 0.5               | 0.12 – 0.5      | 100                        |
|                                                    | Ceftazidime                  | 128                                   | 128               | 16 – >128       | 0                          |
|                                                    | Cefepime                     | 1                                     | 2                 | ≤0.12 – 2       | 100                        |
|                                                    | Aztreonam                    | 32                                    | 64                | 4 – 128         | 8.3                        |
|                                                    | Piperacillin–tazobactam      | 64                                    | >128              | 16 – >128       | 25.0                       |
|                                                    | Doripenem                    | 0.06                                  | 0.12              | 0.06 – 0.12     | 100                        |
|                                                    | Imipenem                     | 1                                     | 2                 | 0.25 – 4        | 83.3                       |
|                                                    | Meropenem                    | 0.06                                  | 0.12              | 0.03 – 0.25     | 100                        |
|                                                    | Amikacin                     | 2                                     | 2                 | 1 – 4           | 100                        |
|                                                    | Colistin (n=8) <sup>d</sup>  | — <sup>b</sup>                        | —                 | 0.5 – 1         | 100                        |
|                                                    | Tigecycline                  | 0.5                                   | 0.5               | 0.25 – 0.5      | 100                        |
|                                                    | Levofloxacin                 | 0.12                                  | 0.5               | 0.06 – 2        | 100                        |
| Proteaceae                                         |                              |                                       |                   |                 |                            |
| All (183) <sup>k</sup>                             | Ceftazidime–avibactam        | 0.06                                  | 0.12              | ≤0.015 – 32     | 98.9                       |
|                                                    | Ceftazidime                  | 0.06                                  | 0.25              | ≤0.015 – >128   | 96.7                       |
|                                                    | Cefepime                     | ≤0.12                                 | 0.25              | ≤0.12 – >16     | 97.8                       |
|                                                    | Aztreonam                    | ≤0.015                                | 0.12              | ≤0.015 – 64     | 97.3                       |
|                                                    | Piperacillin–tazobactam      | ≤0.25                                 | 1                 | ≤0.25 – 128     | 99.5                       |
|                                                    | Doripenem                    | 0.25                                  | 0.5               | 0.03 – 4        | 96.2                       |
|                                                    | Imipenem                     | 2                                     | 4                 | 0.12 – >8       | 18.6                       |
|                                                    | Meropenem                    | 0.12                                  | 0.25              | 0.015 – 2       | 99.5                       |
|                                                    | Amikacin                     | 4                                     | 8                 | ≤0.25 – >32     | 97.3                       |
|                                                    | Colistin (n=80) <sup>d</sup> | >4                                    | >4                | 2 – >4          | 1.3                        |
|                                                    | Tigecycline                  | 2                                     | 4                 | 0.5 – 8         | 61.8                       |
|                                                    | Levofloxacin                 | 0.06                                  | 0.5               | ≤0.03 – >4      | 95.6                       |
| All, MBL-negative (182)                            | Ceftazidime–avibactam        | 0.06                                  | 0.12              | ≤0.015 – 16     | 99.5                       |
|                                                    | Ceftazidime                  | 0.06                                  | 0.25              | ≤0.015 – >128   | 97.3                       |
|                                                    | Cefepime                     | ≤0.12                                 | ≤0.12             | ≤0.12 – >16     | 98.4                       |
|                                                    | Aztreonam                    | ≤0.015                                | 0.12              | ≤0.015 – 64     | 97.8                       |
|                                                    | Piperacillin–tazobactam      | ≤0.25                                 | 1                 | ≤0.25 – 8       | 100                        |
|                                                    | Doripenem                    | 0.25                                  | 0.5               | 0.03 – 4        | 96.7                       |
|                                                    | Imipenem                     | 2                                     | 4                 | 0.12 – >8       | 18.7                       |
|                                                    | Meropenem                    | 0.12                                  | 0.12              | 0.015 – 1       | 100                        |
|                                                    | Amikacin                     | 4                                     | 8                 | ≤0.25 – >32     | 97.8                       |
|                                                    | Colistin (n=80) <sup>d</sup> | >4                                    | >4                | 2 – >4          | 1.3                        |
|                                                    | Tigecycline                  | 2                                     | 4                 | 0.5 – 8         | 62.1                       |
|                                                    | Levofloxacin                 | 0.06                                  | 0.5               | ≤0.03 – >4      | 96.2                       |
| Ceftazidime-nonsusceptible (6)                     | Ceftazidime–avibactam        | — <sup>b</sup>                        | —                 | 0.06 – 32       | 66.7                       |
|                                                    | Ceftazidime                  | —                                     | —                 | 16 – >128       | 0                          |

| Organism, phenotype (no. of isolates) <sup>a</sup> | Antimicrobial agent                          | MIC (µg/ml) <sup>b</sup> |                   |                 | % Susceptible <sup>c</sup> |      |
|----------------------------------------------------|----------------------------------------------|--------------------------|-------------------|-----------------|----------------------------|------|
|                                                    |                                              | MIC <sub>50</sub>        | MIC <sub>90</sub> | Range           |                            |      |
|                                                    | Cefepime                                     | —                        | —                 | ≤0.12 – >16     | 50.0                       |      |
|                                                    | Aztreonam                                    | —                        | —                 | 0.03 – 64       | 50.0                       |      |
|                                                    | Piperacillin–tazobactam                      | —                        | —                 | ≤0.25 – 128     | 83.3                       |      |
|                                                    | Doripenem                                    | —                        | —                 | 0.12 – 2        | 66.7                       |      |
|                                                    | Imipenem                                     | —                        | —                 | 2 – >8          | 0                          |      |
|                                                    | Meropenem                                    | —                        | —                 | 0.06 – 2        | 83.3                       |      |
|                                                    | Amikacin                                     | —                        | —                 | 2 – >32         | 50.0                       |      |
|                                                    | Colistin (n=2) <sup>d</sup>                  | —                        | —                 | >4 – >4         | 0                          |      |
|                                                    | Tigecycline                                  | —                        | —                 | 2 – 4           | 50.0                       |      |
|                                                    | Levofloxacin                                 | —                        | —                 | 0.5 – >4        | 16.7                       |      |
|                                                    | Ceftazidime-nonsusceptible, MBL-negative (5) | Ceftazidime–avibactam    | — <sup>b</sup>    | —               | 0.06 – 16                  | 80.0 |
|                                                    |                                              | Ceftazidime              | —                 | —               | 16 – >128                  | 0    |
|                                                    |                                              | Cefepime                 | —                 | —               | ≤0.12 – >16                | 60.0 |
| Aztreonam                                          |                                              | —                        | —                 | 0.03 – 64       | 60.0                       |      |
| Piperacillin–tazobactam                            |                                              | —                        | —                 | ≤0.25 – 1       | 100                        |      |
| Doripenem                                          |                                              | —                        | —                 | 0.12 – 2        | 80.0                       |      |
| Imipenem                                           |                                              | —                        | —                 | 2 – 8           | 0                          |      |
| Meropenem                                          |                                              | —                        | —                 | 0.06 – 1        | 100                        |      |
| Amikacin                                           |                                              | —                        | —                 | 2 – 32          | 60.0                       |      |
| Colistin (n=2) <sup>d</sup>                        |                                              | —                        | —                 | >4 – >4         | 0                          |      |
| Tigecycline                                        |                                              | —                        | —                 | 2 – 4           | 60.0                       |      |
| Levofloxacin                                       |                                              | —                        | —                 | 0.5 – >4        | 20.0                       |      |
| Meropenem-nonsusceptible (1) <sup>h</sup>          |                                              | Ceftazidime–avibactam    | — <sup>b</sup>    | —               | 32                         | 0    |
|                                                    | Ceftazidime                                  | —                        | —                 | >128            | 0                          |      |
|                                                    | Cefepime                                     | —                        | —                 | 16              | 0                          |      |
|                                                    | Aztreonam                                    | —                        | —                 | 16              | 0                          |      |
|                                                    | Piperacillin–tazobactam                      | —                        | —                 | 128             | 0                          |      |
|                                                    | Doripenem                                    | —                        | —                 | 2               | 0                          |      |
|                                                    | Imipenem                                     | —                        | —                 | >8              | 0                          |      |
|                                                    | Meropenem                                    | —                        | —                 | 2               | 0                          |      |
|                                                    | Amikacin                                     | —                        | —                 | >32             | 0                          |      |
|                                                    | Colistin (n=0) <sup>d</sup>                  | —                        | —                 | ND <sup>e</sup> | ND                         |      |
|                                                    | Tigecycline                                  | —                        | —                 | 4               | 0                          |      |
|                                                    | Levofloxacin                                 | —                        | —                 | >4              | 0                          |      |
|                                                    | Multidrug-resistant (3)                      | Ceftazidime–avibactam    | — <sup>b</sup>    | —               | 1 – 32                     | 66.7 |
| Ceftazidime                                        |                                              | —                        | —                 | >128 – >128     | 0                          |      |
| Cefepime                                           |                                              | —                        | —                 | 16 – >16        | 0                          |      |
| Aztreonam                                          |                                              | —                        | —                 | 16 – 64         | 0                          |      |
| Piperacillin–tazobactam                            |                                              | —                        | —                 | ≤0.25 – 128     | 66.7                       |      |
| Doripenem                                          |                                              | —                        | —                 | 0.12 – 2        | 66.7                       |      |
| Imipenem                                           |                                              | —                        | —                 | 2 – >8          | 0                          |      |
| Meropenem                                          |                                              | —                        | —                 | 0.06 – 2        | 66.7                       |      |
| Amikacin                                           |                                              | —                        | —                 | 32 – >32        | 0                          |      |
| Colistin (n=0) <sup>d</sup>                        |                                              | —                        | —                 | ND <sup>e</sup> | ND                         |      |
| Tigecycline                                        |                                              | —                        | —                 | 4 – 4           | 0                          |      |
| Levofloxacin                                       |                                              | —                        | —                 | >4 – >4         | 0                          |      |
| Multidrug-resistant, MBL-negative (2)              |                                              | Ceftazidime–avibactam    | — <sup>b</sup>    | —               | 1 – 4                      | 100  |
|                                                    | Ceftazidime                                  | —                        | —                 | >128 – >128     | 0                          |      |
|                                                    | Cefepime                                     | —                        | —                 | >16 – >16       | 0                          |      |
|                                                    | Aztreonam                                    | —                        | —                 | 32 – 64         | 0                          |      |
|                                                    | Piperacillin–tazobactam                      | —                        | —                 | ≤0.25 – ≤0.25   | 100                        |      |
|                                                    | Doripenem                                    | —                        | —                 | 0.12 – 0.25     | 100                        |      |
|                                                    | Imipenem                                     | —                        | —                 | 2 – 4           | 0                          |      |
|                                                    | Meropenem                                    | —                        | —                 | 0.06 – 0.06     | 100                        |      |
|                                                    | Amikacin                                     | —                        | —                 | 32 – 32         | 0                          |      |
|                                                    | Colistin (n=0) <sup>d</sup>                  | —                        | —                 | ND <sup>e</sup> | ND                         |      |
|                                                    | Tigecycline                                  | —                        | —                 | 4 – 4           | 0                          |      |
|                                                    | Levofloxacin                                 | —                        | —                 | >4 – >4         | 0                          |      |

Other *Enterobacteriaceae*<sup>g</sup>

| Organism, phenotype (no. of isolates) <sup>a</sup> | Antimicrobial agent                        | MIC ( $\mu\text{g/ml}$ ) <sup>b</sup> |                   |              | % Susceptible <sup>c</sup> |      |
|----------------------------------------------------|--------------------------------------------|---------------------------------------|-------------------|--------------|----------------------------|------|
|                                                    |                                            | MIC <sub>50</sub>                     | MIC <sub>90</sub> | Range        |                            |      |
| All (30) <sup>1</sup>                              | Ceftazidime–avibactam                      | 0.25                                  | 0.5               | 0.03 – 0.5   | 100                        |      |
|                                                    | Ceftazidime                                | 0.12                                  | 0.5               | 0.06 – 0.5   | 100                        |      |
|                                                    | Cefepime                                   | ≤0.12                                 | ≤0.12             | ≤0.12 – 0.25 | 100                        |      |
|                                                    | Aztreonam                                  | 0.12                                  | 0.25              | ≤0.015 – 0.5 | 100                        |      |
|                                                    | Piperacillin–tazobactam                    | 2                                     | 2                 | ≤0.25 – 4    | 100                        |      |
|                                                    | Doripenem                                  | 0.12                                  | 0.25              | 0.06 – 1     | 100                        |      |
|                                                    | Imipenem                                   | 0.5                                   | 2                 | 0.25 – 4     | 83.3                       |      |
|                                                    | Meropenem                                  | 0.06                                  | 0.12              | 0.03 – 0.12  | 100                        |      |
|                                                    | Amikacin                                   | 2                                     | 4                 | ≤0.25 – 8    | 100                        |      |
|                                                    | Colistin (n=16) <sup>d</sup>               | >4                                    | >4                | 1 – >4       | 6.3                        |      |
|                                                    | Tigecycline                                | 1                                     | 2                 | 0.25 – 2     | 100                        |      |
|                                                    | Levofloxacin                               | 0.12                                  | 0.25              | ≤0.03 – 1    | 100                        |      |
|                                                    | <i>Pseudomonas aeruginosa</i> <sup>§</sup> |                                       |                   |              |                            |      |
| All (300)                                          | Ceftazidime–avibactam                      | 2                                     | 4                 | 0.12 – 128   | 99.0                       |      |
|                                                    | Ceftazidime                                | 2                                     | 16                | 0.5 – >128   | 88.0                       |      |
|                                                    | Cefepime                                   | 2                                     | 16                | ≤0.12 – >16  | 89.7                       |      |
|                                                    | Aztreonam                                  | 8                                     | 32                | 0.25 – >128  | 73.7                       |      |
|                                                    | Piperacillin–tazobactam                    | 8                                     | 64                | ≤0.25 – >128 | 84.0                       |      |
|                                                    | Doripenem                                  | 0.5                                   | 2                 | 0.03 – >4    | 92.7                       |      |
|                                                    | Imipenem                                   | 2                                     | 8                 | 0.06 – >8    | 72.3                       |      |
|                                                    | Meropenem                                  | 0.5                                   | 2                 | 0.015 – >8   | 91.3                       |      |
|                                                    | Amikacin                                   | 4                                     | 8                 | ≤0.25 – >32  | 97.3                       |      |
|                                                    | Colistin (n=175) <sup>d</sup>              | 2                                     | 2                 | 0.5 – 8      | 93.1                       |      |
|                                                    | Levofloxacin                               | 0.5                                   | 4                 | ≤0.03 – >4   | 87.3                       |      |
|                                                    | Ceftazidime-nonsusceptible (36)            | Ceftazidime–avibactam                 | 4                 | 8            | 0.25 – 128                 | 91.7 |
|                                                    |                                            | Ceftazidime                           | 64                | 128          | 16 – >128                  | 0    |
| Cefepime                                           |                                            | 16                                    | >16               | 1 – >16      | 36.1                       |      |
| Aztreonam                                          |                                            | 32                                    | 128               | 4 – >128     | 19.4                       |      |
| Piperacillin–tazobactam                            |                                            | 128                                   | >128              | 16 – >128    | 5.6                        |      |
| Doripenem                                          |                                            | 1                                     | >4                | 0.12 – >4    | 69.4                       |      |
| Imipenem                                           |                                            | 2                                     | >8                | 0.5 – >8     | 58.3                       |      |
| Meropenem                                          |                                            | 1                                     | >8                | 0.25 – >8    | 72.2                       |      |
| Amikacin                                           |                                            | 4                                     | 32                | ≤0.25 – >32  | 88.9                       |      |
| Colistin (n=23) <sup>d</sup>                       |                                            | 2                                     | 2                 | 0.5 – 4      | 95.7                       |      |
| Levofloxacin                                       |                                            | 0.5                                   | >4                | 0.12 – >4    | 66.7                       |      |
| Meropenem-nonsusceptible (26)                      |                                            | Ceftazidime–avibactam                 | 4                 | 16           | 0.5 – 128                  | 88.5 |
|                                                    |                                            | Ceftazidime                           | 8                 | 128          | 2 – >128                   | 61.5 |
|                                                    | Cefepime                                   | 8                                     | >16               | 2 – >16      | 65.4                       |      |
|                                                    | Aztreonam                                  | 16                                    | 64                | 1 – 128      | 38.5                       |      |
|                                                    | Piperacillin–tazobactam                    | 16                                    | >128              | 4 – >128     | 57.7                       |      |
|                                                    | Doripenem                                  | 4                                     | >4                | 0.5 – >4     | 26.9                       |      |
|                                                    | Imipenem                                   | >8                                    | >8                | 2 – >8       | 7.7                        |      |
|                                                    | Meropenem                                  | 8                                     | >8                | 4 – >8       | 0                          |      |
|                                                    | Amikacin                                   | 4                                     | 32                | 2 – >32      | 84.6                       |      |
|                                                    | Colistin (n=18) <sup>d</sup>               | 2                                     | 2                 | 0.5 – 2      | 100                        |      |
|                                                    | Levofloxacin                               | 2                                     | >4                | 0.25 – >4    | 53.9                       |      |
|                                                    | Colistin-resistant (1)                     | Ceftazidime–avibactam                 | — <sup>b</sup>    | —            | 2                          | 100  |
|                                                    |                                            | Ceftazidime                           | —                 | —            | 8                          | 100  |
| Cefepime                                           |                                            | —                                     | —                 | 2            | 100                        |      |
| Aztreonam                                          |                                            | —                                     | —                 | 32           | 0                          |      |
| Piperacillin–tazobactam                            |                                            | —                                     | —                 | 4            | 100                        |      |
| Doripenem                                          |                                            | —                                     | —                 | 0.5          | 100                        |      |
| Imipenem                                           |                                            | —                                     | —                 | 2            | 100                        |      |
| Meropenem                                          |                                            | —                                     | —                 | 0.25         | 100                        |      |
| Amikacin                                           |                                            | —                                     | —                 | 2            | 100                        |      |
| Colistin (n=1) <sup>d</sup>                        |                                            | —                                     | —                 | 8            | 0                          |      |
| Levofloxacin                                       |                                            | —                                     | —                 | 0.5          | 100                        |      |
| Multidrug-resistant (17)                           | Ceftazidime–avibactam                      | 8                                     | 32                | 1 – 128      | 82.4                       |      |
|                                                    | Ceftazidime                                | 128                                   | 128               | 4 – >128     | 5.9                        |      |

| Organism, phenotype (no. of isolates) <sup>a</sup> | Antimicrobial agent          | MIC ( $\mu\text{g/ml}$ ) <sup>b</sup> |                   |           | % Susceptible <sup>c</sup> |
|----------------------------------------------------|------------------------------|---------------------------------------|-------------------|-----------|----------------------------|
|                                                    |                              | MIC <sub>50</sub>                     | MIC <sub>90</sub> | Range     |                            |
|                                                    | Cefepime                     | >16                                   | >16               | 8 – >16   | 5.9                        |
|                                                    | Aztreonam                    | 64                                    | >128              | 16 – >128 | 0                          |
|                                                    | Piperacillin–tazobactam      | >128                                  | >128              | 16 – >128 | 11.8                       |
|                                                    | Doripenem                    | 2                                     | >4                | 0.5 – >4  | 58.8                       |
|                                                    | Imipenem                     | 8                                     | >8                | 2 – >8    | 41.2                       |
|                                                    | Meropenem                    | 2                                     | >8                | 0.25 – >8 | 58.8                       |
|                                                    | Amikacin                     | 8                                     | 32                | 2 – >32   | 88.2                       |
|                                                    | Colistin (n=11) <sup>d</sup> | 2                                     | 2                 | 0.5 – 2   | 100                        |
|                                                    | Levofloxacin                 | 4                                     | >4                | 0.12 – >4 | 47.1                       |

<sup>a</sup> MBL-negative, no gene encoding a metallo- $\beta$ -lactamase was detected by PCR.

<sup>b</sup> —, MIC<sub>50</sub> and MIC<sub>90</sub> were not calculated for  $n < 10$  isolates.

<sup>c</sup> % Susceptibility was determined according to CLSI 2016 breakpoints with the exception of ceftazidime–avibactam and tigecycline, where US FDA breakpoints were applied. Because CLSI colistin breakpoints are not available for the *Enterobacteriaceae*, susceptibility for this organism group was determined using the EUCAST 2016 breakpoints for colistin.

<sup>d</sup> Values are for colistin tested without 0.002% polysorbate–80; isolates collected in 2014–2015 only.

<sup>e</sup> ND, not determined; MIC range and % susceptible were not calculated for  $n=0$  isolates.

<sup>f</sup> Excludes isolates of Proteaceae and *Serratia* spp. that are intrinsically resistant to colistin.

<sup>g</sup> All isolates were MBL–negative.

<sup>h</sup> All isolates were MBL–positive.

<sup>i</sup> *Enterobacter* spp. includes *Enterobacter aerogenes* ( $n=67$ ), *Enterobacter asburiae* ( $n=9$ ), *Enterobacter cloacae* ( $n=79$ ), *Enterobacter kobei* ( $n=5$ ), and *Enterobacter ludwigii* ( $n=3$ ).

<sup>j</sup> *Citrobacter* spp. includes *Citrobacter amalonaticus* ( $n=3$ ), *Citrobacter braakii* ( $n=1$ ), *Citrobacter freundii* ( $n=41$ ), *Citrobacter koseri* ( $n=47$ ), and *Citrobacter* of unknown species ( $n=1$ ).

<sup>k</sup> Proteaceae includes *Morganella morganii* ( $n=37$ ), *Proteus mirabilis* ( $n=86$ ), *Proteus penneri* ( $n=4$ ), *Proteus vulgaris* ( $n=41$ ), *Providencia rettgeri* ( $n=11$ ), and *Providencia stuartii* ( $n=4$ ).

<sup>l</sup> Other *Enterobacteriaceae* includes *Raoultella ornithinolytica* ( $n=2$ ), *Serratia liquefaciens* ( $n=1$ ), and *Serratia marcescens* ( $n=27$ ).

**Supplemental Table S2B.** Australia – *In vitro* activities of ceftazidime–avibactam and comparator antimicrobial agents tested against 204 isolates of  $\beta$ –lactamase–positive *Enterobacteriaceae* (n=134) and *P. aeruginosa* (n=70) collected as part of the INFORM global surveillance program in 2012–2015.

| Organism/Genotype (no. of isolates) <sup>a</sup>     | Antimicrobial agent          | MIC ( $\mu\text{g/ml}$ ) <sup>b</sup> |                   |                    | % Susceptible <sup>c</sup> |
|------------------------------------------------------|------------------------------|---------------------------------------|-------------------|--------------------|----------------------------|
|                                                      |                              | MIC <sub>50</sub>                     | MIC <sub>90</sub> | Range              |                            |
| <i>Enterobacteriaceae</i> (134)<br>OSBL–positive (4) | Ceftazidime–avibactam        | — <sup>b</sup>                        | —                 | 0.12 – 0.5         | 100                        |
|                                                      | Ceftazidime                  | —                                     | —                 | 0.12 – 64          | 75.0                       |
|                                                      | Cefepime                     | —                                     | —                 | $\leq 0.12$ – 1    | 100                        |
|                                                      | Aztreonam                    | —                                     | —                 | 0.03 – 32          | 75.0                       |
|                                                      | Piperacillin–tazobactam      | —                                     | —                 | 0.5 – >128         | 25.0                       |
|                                                      | Doripenem                    | —                                     | —                 | 0.06 – 0.25        | 100                        |
|                                                      | Imipenem                     | —                                     | —                 | 0.12 – 2           | 75.0                       |
|                                                      | Meropenem                    | —                                     | —                 | 0.03 – 0.06        | 100                        |
|                                                      | Amikacin                     | —                                     | —                 | 0.5 – >32          | 75.0                       |
|                                                      | Colistin (n=2) <sup>d</sup>  | —                                     | —                 | 0.5 – 1            | 100                        |
|                                                      | Tigecycline                  | —                                     | —                 | 0.25 – 1           | 100                        |
|                                                      | Levofloxacin                 | —                                     | —                 | 0.06 – 0.12        | 100                        |
| ESBL–positive (66) <sup>e</sup>                      | Ceftazidime–avibactam        | 0.25                                  | 0.5               | 0.03 – 4           | 100                        |
|                                                      | Ceftazidime                  | 16                                    | 128               | 0.05 – >128        | 24.2                       |
|                                                      | Cefepime                     | >16                                   | >16               | 2 – >16            | 7.6                        |
|                                                      | Aztreonam                    | 32                                    | 128               | 2 – >128           | 12.1                       |
|                                                      | Piperacillin–tazobactam      | 4                                     | >128              | $\leq 0.25$ – >128 | 78.8                       |
|                                                      | Doripenem                    | 0.06                                  | 0.12              | 0.015 – 2          | 98.5                       |
|                                                      | Imipenem                     | 0.25                                  | 0.5               | 0.06 – 4           | 95.5                       |
|                                                      | Meropenem                    | 0.03                                  | 0.06              | 0.015 – 2          | 98.5                       |
|                                                      | Amikacin                     | 4                                     | 16                | 1 – >32            | 93.9                       |
|                                                      | Colistin (n=33) <sup>d</sup> | 1                                     | 1                 | $\leq 0.12$ – 1    | 100                        |
|                                                      | Tigecycline                  | 0.25                                  | 1                 | 0.06 – 4           | 95.5                       |
|                                                      | Levofloxacin                 | >4                                    | >4                | $\leq 0.03$ – >4   | 36.4                       |
| AmpC–positive (57) <sup>f</sup>                      | Ceftazidime–avibactam        | 0.25                                  | 0.5               | 0.03 – 1           | 100                        |
|                                                      | Ceftazidime                  | 0.5                                   | 128               | 0.06 – >128        | 66.7                       |
|                                                      | Cefepime                     | $\leq 0.12$                           | 4                 | $\leq 0.12$ – 8    | 87.7                       |
|                                                      | Aztreonam                    | 0.12                                  | 32                | 0.03 – 128         | 75.4                       |
|                                                      | Piperacillin–tazobactam      | 4                                     | 64                | $\leq 0.25$ – >128 | 84.2                       |
|                                                      | Doripenem                    | 0.12                                  | 0.5               | 0.03 – 2           | 96.5                       |
|                                                      | Imipenem                     | 2                                     | 4                 | 0.25 – 8           | 28.1                       |
|                                                      | Meropenem                    | 0.06                                  | 0.25              | 0.03 – 0.5         | 100                        |
|                                                      | Amikacin                     | 2                                     | 4                 | 1 – >32            | 94.7                       |
|                                                      | Colistin (n=17) <sup>d</sup> | 1                                     | >4                | 0.5 – >4           | 82.4                       |
|                                                      | Tigecycline                  | 0.5                                   | 2                 | 0.06 – 8           | 96.5                       |
|                                                      | Levofloxacin                 | 0.06                                  | 2                 | $\leq 0.03$ – >4   | 94.7                       |
| ESBL–positive + AmpC–positive (4) <sup>g</sup>       | Ceftazidime–avibactam        | — <sup>b</sup>                        | —                 | 0.25 – 1           | 100                        |
|                                                      | Ceftazidime                  | —                                     | —                 | 32 – 128           | 0                          |
|                                                      | Cefepime                     | —                                     | —                 | 0.25 – >16         | 75.0                       |
|                                                      | Aztreonam                    | —                                     | —                 | 32 – 128           | 0                          |
|                                                      | Piperacillin–tazobactam      | —                                     | —                 | 16 – >128          | 25.0                       |
|                                                      | Doripenem                    | —                                     | —                 | 0.06 – 0.5         | 100                        |
|                                                      | Imipenem                     | —                                     | —                 | 0.5 – 2            | 75.0                       |
|                                                      | Meropenem                    | —                                     | —                 | 0.06 – 0.25        | 100                        |
|                                                      | Amikacin                     | —                                     | —                 | 1 – 8              | 100                        |
|                                                      | Colistin (n=2) <sup>d</sup>  | —                                     | —                 | 0.5 – 1            | 100                        |
|                                                      | Tigecycline                  | —                                     | —                 | 0.5 – 1            | 100                        |
|                                                      | Levofloxacin                 | —                                     | —                 | $\leq 0.03$ – >4   | 50.0                       |
| MBL–positive (3) <sup>h</sup>                        | Ceftazidime–avibactam        | — <sup>b</sup>                        | —                 | 32 – 128           | 0                          |
|                                                      | Ceftazidime                  | —                                     | —                 | 64 – >128          | 0                          |

| Organism/Genotype (no. of isolates) <sup>a</sup>          | Antimicrobial agent          | MIC ( $\mu\text{g/ml}$ ) <sup>b</sup> |                   |                   | % Susceptible <sup>c</sup> |
|-----------------------------------------------------------|------------------------------|---------------------------------------|-------------------|-------------------|----------------------------|
|                                                           |                              | MIC <sub>50</sub>                     | MIC <sub>90</sub> | Range             |                            |
|                                                           | Cefepime                     | —                                     | —                 | 2 – >16           | 33.3                       |
|                                                           | Aztreonam                    | —                                     | —                 | 0.25 – 32         | 33.3                       |
|                                                           | Piperacillin–tazobactam      | —                                     | —                 | 4 – 128           | 33.3                       |
|                                                           | Doripenem                    | —                                     | —                 | 2 – >4            | 0                          |
|                                                           | Imipenem                     | —                                     | —                 | 2 – >8            | 0                          |
|                                                           | Meropenem                    | —                                     | —                 | 2 – 8             | 0                          |
|                                                           | Amikacin                     | —                                     | —                 | 0.5 – >32         | 66.7                       |
|                                                           | Colistin (n=1) <sup>d</sup>  | —                                     | —                 | 1                 | 100                        |
|                                                           | Tigecycline                  | —                                     | —                 | 0.5 – 4           | 66.7                       |
|                                                           | Levofloxacin                 | —                                     | —                 | 0.5 – >4          | 66.7                       |
| <i>P. aeruginosa</i> (70)                                 | Ceftazidime–avibactam        | — <sup>b</sup>                        | —                 | 128               | 0                          |
| GES, Spectrum undefined (1) <sup>ij</sup>                 | Ceftazidime                  | —                                     | —                 | >128              | 0                          |
|                                                           | Cefepime                     | —                                     | —                 | >16               | 0                          |
|                                                           | Aztreonam                    | —                                     | —                 | 16                | 0                          |
|                                                           | Piperacillin–tazobactam      | —                                     | —                 | 16                | 0                          |
|                                                           | Doripenem                    | —                                     | —                 | >4                | 0                          |
|                                                           | Imipenem                     | —                                     | —                 | >8                | 0                          |
|                                                           | Meropenem                    | —                                     | —                 | 8                 | 0                          |
|                                                           | Amikacin                     | —                                     | —                 | >32               | 0                          |
|                                                           | Colistin (n=1) <sup>d</sup>  | —                                     | —                 | 2                 | 100                        |
|                                                           | Levofloxacin                 | —                                     | —                 | >4                | 0                          |
| No acquired $\beta$ -lactamase detected (69) <sup>i</sup> | Ceftazidime–avibactam        | 2                                     | 4                 | 0.12 – 32         | 97.1                       |
|                                                           | Ceftazidime                  | 4                                     | 64                | 0.5 – 128         | 81.2                       |
|                                                           | Cefepime                     | 4                                     | 16                | $\leq 0.12$ – >16 | 81.2                       |
|                                                           | Aztreonam                    | 8                                     | 32                | 0.5 – >128        | 65.2                       |
|                                                           | Piperacillin–tazobactam      | 8                                     | 128               | 0.5 – >128        | 78.3                       |
|                                                           | Doripenem                    | 1                                     | >4                | 0.12 – >4         | 69.6                       |
|                                                           | Imipenem                     | 4                                     | >8                | 2 – >8            | 5.8                        |
|                                                           | Meropenem                    | 2                                     | >8                | 0.12 – >8         | 63.8                       |
|                                                           | Amikacin                     | 4                                     | 16                | $\leq 0.25$ – >32 | 92.8                       |
|                                                           | Colistin (n=34) <sup>d</sup> | 2                                     | 2                 | 0.5 – 4           | 94.1                       |
|                                                           | Levofloxacin                 | 0.5                                   | >4                | 0.12 – >4         | 73.9                       |

<sup>a</sup> OSBL, original–spectrum  $\beta$ -lactamase (e.g. TEM–1, SHV–1, SHV–11); ESBL, extended–spectrum  $\beta$ -lactamase; MBL, metallo– $\beta$ -lactamase.

<sup>b</sup> —, MIC<sub>50</sub> and MIC<sub>90</sub> were not calculated for n < 10 isolates.

<sup>c</sup> % Susceptibility was determined according to CLSI 2016 breakpoints with the exception of ceftazidime–avibactam and tigecycline, where US FDA breakpoints were applied. Because CLSI colistin breakpoints are not available for the *Enterobacteriaceae*, susceptibility for this organism group was determined using the EUCAST 2016 breakpoints for colistin.

<sup>d</sup> Values are for colistin tested without 0.002% polysorbate–80; isolates collected in 2014–2015 only.

<sup>e</sup> Includes isolates carrying CTX–M–1; CTX–M–14; CTX–M–15; CTX–M–27; CTX–M–55; CTX–M–65; CTX–M–14 and CTX–M–79; CTX–M–14 and CTX–M–145; CTX–M–15 and SHV–12; SHV–2; SHV–38; VEB–6; and the chromosomal ESBL common to *K. oxytoca* with or without SHV–OSBLs and/or TEM–OSBLs.

<sup>f</sup> Includes isolates carrying ACT–type; CMY–2; DHA–1; and the chromosomal AmpC common to *Citrobacter* spp., *Enterobacter* spp., *M. morgani*, *Providencia* spp., and *Serratia* spp. with or without SHV–OSBLs and/or TEM–OSBLs.

<sup>g</sup> Includes isolates carrying CTX–M–15 and DHA–1, SHV–12 and the chromosomal AmpC common to *Citrobacter* spp., and SHV–12 or CTX–M–15 and the chromosomal AmpC common to *Enterobacter* spp.



<sup>h</sup> Includes isolates carrying IMP-4; IMP-4 and SHV-12; and VIM-1, VEB-1, SHV-5 and the chromosomal AmpC common to *Providencia* spp. with or without SHV-OSBLs and/or TEM-OSBLs.

<sup>i</sup> Assumed to carry the chromosomal AmpC common to *P. aeruginosa*.

<sup>j</sup> Isolate carrying GES-29.

**Supplemental Table S3A.** China – *In vitro* activities of ceftazidime–avibactam and comparator antimicrobial agents tested against 1,242 isolates of *Enterobacteriaceae* and 195 isolates of *P. aeruginosa* collected as part of the INFORM global surveillance program in 2012–2013<sup>a</sup>.

| Phenotype/Organism (no. of isolates) <sup>b</sup> | Antimicrobial agent                            | MIC (µg/ml) <sup>c</sup> |                   |                 | % Susceptible <sup>d</sup> |      |
|---------------------------------------------------|------------------------------------------------|--------------------------|-------------------|-----------------|----------------------------|------|
|                                                   |                                                | MIC <sub>50</sub>        | MIC <sub>90</sub> | Range           |                            |      |
| <i>Enterobacteriaceae</i>                         |                                                |                          |                   |                 |                            |      |
| All (1,242)                                       | Ceftazidime–avibactam                          | 0.12                     | 0.5               | ≤0.015 – >128   | 98.8                       |      |
|                                                   | Ceftazidime                                    | 0.5                      | 128               | ≤0.015 – >128   | 68.4                       |      |
|                                                   | Cefepime                                       | 0.25                     | >16               | ≤0.12 – >16     | 64.6                       |      |
|                                                   | Aztreonam                                      | 0.25                     | 64                | ≤0.015 – >128   | 62.2                       |      |
|                                                   | Piperacillin–tazobactam                        | 2                        | 64                | ≤0.25 – >128    | 84.0                       |      |
|                                                   | Doripenem                                      | 0.06                     | 0.25              | ≤0.008 – >4     | 96.5                       |      |
|                                                   | Imipenem                                       | 0.25                     | 2                 | ≤0.03 – >8      | 82.3                       |      |
|                                                   | Meropenem                                      | 0.03                     | 0.12              | 0.008 – >8      | 96.2                       |      |
|                                                   | Amikacin                                       | 2                        | 8                 | ≤0.25 – >32     | 94.3                       |      |
|                                                   | Colistin (n=0) <sup>e</sup>                    | — <sup>b</sup>           | —                 | ND <sup>f</sup> | ND                         |      |
|                                                   | Tigecycline                                    | 0.5                      | 2                 | ≤0.015 – 8      | 92.3                       |      |
|                                                   | Levofloxacin                                   | 0.5                      | >4                | ≤0.03 – >4      | 62.7                       |      |
|                                                   | All, MBL–negative (1,232)                      | Ceftazidime–avibactam    | 0.12              | 0.5             | ≤0.015 – >128              | 99.5 |
|                                                   |                                                | Ceftazidime              | 0.5               | 64              | ≤0.015 – >128              | 68.9 |
| Cefepime                                          |                                                | 0.25                     | >16               | ≤0.12 – >16     | 65.1                       |      |
| Aztreonam                                         |                                                | 0.25                     | 64                | ≤0.015 – >128   | 62.7                       |      |
| Piperacillin–tazobactam                           |                                                | 2                        | 64                | ≤0.25 – >128    | 84.6                       |      |
| Doripenem                                         |                                                | 0.06                     | 0.25              | ≤0.008 – >4     | 97.2                       |      |
| Imipenem                                          |                                                | 0.25                     | 2                 | ≤0.03 – >8      | 82.9                       |      |
| Meropenem                                         |                                                | 0.03                     | 0.12              | 0.008 – >8      | 96.9                       |      |
| Amikacin                                          |                                                | 2                        | 8                 | ≤0.25 – >32     | 94.5                       |      |
| Colistin (n=0) <sup>e</sup>                       |                                                | — <sup>b</sup>           | —                 | ND <sup>f</sup> | ND                         |      |
| Tigecycline                                       |                                                | 0.5                      | 2                 | ≤0.015 – 8      | 92.2                       |      |
| Levofloxacin                                      |                                                | 0.5                      | >4                | ≤0.03 – >4      | 62.9                       |      |
| Ceftazidime-nonsusceptible (393)                  |                                                | Ceftazidime–avibactam    | 0.25              | 2               | ≤0.015 – >128              | 96.2 |
|                                                   |                                                | Ceftazidime              | 64                | >128            | 8 – >128                   | 0    |
|                                                   | Cefepime                                       | >16                      | >16               | ≤0.12 – >16     | 26.0                       |      |
|                                                   | Aztreonam                                      | 64                       | >128              | 1 – >128        | 5.9                        |      |
|                                                   | Piperacillin–tazobactam                        | 16                       | >128              | ≤0.25 – >128    | 54.7                       |      |
|                                                   | Doripenem                                      | 0.06                     | 2                 | 0.015 – >4      | 89.6                       |      |
|                                                   | Imipenem                                       | 0.5                      | 4                 | ≤0.03 – >8      | 79.1                       |      |
|                                                   | Meropenem                                      | 0.06                     | 4                 | 0.015 – >8      | 88.8                       |      |
|                                                   | Amikacin                                       | 2                        | >32               | ≤0.25 – >32     | 85.8                       |      |
|                                                   | Colistin (n=0) <sup>e</sup>                    | — <sup>b</sup>           | —                 | ND <sup>f</sup> | ND                         |      |
|                                                   | Tigecycline                                    | 0.5                      | 2                 | 0.06 – 8        | 94.7                       |      |
|                                                   | Levofloxacin                                   | >4                       | >4                | ≤0.03 – >4      | 36.9                       |      |
|                                                   | Ceftazidime-nonsusceptible, MBL–negative (383) | Ceftazidime–avibactam    | 0.25              | 1               | ≤0.015 – >128              | 98.4 |
|                                                   |                                                | Ceftazidime              | 64                | >128            | 8 – >128                   | 0    |
| Cefepime                                          |                                                | >16                      | >16               | ≤0.12 – >16     | 26.6                       |      |
| Aztreonam                                         |                                                | 64                       | >128              | 1 – >128        | 5.7                        |      |
| Piperacillin–tazobactam                           |                                                | 16                       | >128              | ≤0.25 – >128    | 55.9                       |      |
| Doripenem                                         |                                                | 0.06                     | 0.5               | 0.015 – >4      | 91.6                       |      |
| Imipenem                                          |                                                | 0.5                      | 4                 | ≤0.03 – >8      | 80.9                       |      |
| Meropenem                                         |                                                | 0.06                     | 0.5               | 0.015 – >8      | 90.9                       |      |
| Amikacin                                          |                                                | 2                        | >32               | ≤0.25 – >32     | 86.2                       |      |
| Colistin (n=0) <sup>e</sup>                       |                                                | — <sup>b</sup>           | —                 | ND <sup>f</sup> | ND                         |      |
| Tigecycline                                       |                                                | 0.5                      | 2                 | 0.06 – 8        | 94.5                       |      |
| Levofloxacin                                      |                                                | >4                       | >4                | ≤0.03 – >4      | 36.8                       |      |
| Meropenem-nonsusceptible (47)                     |                                                | Ceftazidime–avibactam    | 2                 | >128            | 0.06 – >128                | 70.2 |
|                                                   |                                                | Ceftazidime              | 128               | >128            | 0.5 – >128                 | 6.4  |
|                                                   | Cefepime                                       | >16                      | >16               | 2 – >16         | 2.1                        |      |

| Phenotype/Organism (no. of isolates) <sup>b</sup> | Antimicrobial agent                         | MIC (µg/ml) <sup>c</sup> |                   |                 | % Susceptible <sup>d</sup> |
|---------------------------------------------------|---------------------------------------------|--------------------------|-------------------|-----------------|----------------------------|
|                                                   |                                             | MIC <sub>50</sub>        | MIC <sub>90</sub> | Range           |                            |
|                                                   | Aztreonam                                   | >128                     | >128              | 1 – >128        | 6.4                        |
|                                                   | Piperacillin–tazobactam                     | >128                     | >128              | 1 – >128        | 8.5                        |
|                                                   | Doripenem                                   | >4                       | >4                | 0.03 – >4       | 8.5                        |
|                                                   | Imipenem                                    | >8                       | >8                | 0.12 – >8       | 6.4                        |
|                                                   | Meropenem                                   | >8                       | >8                | 2 – >8          | 0                          |
|                                                   | Amikacin                                    | 8                        | >32               | ≤0.25 – >32     | 70.2                       |
|                                                   | Colistin (n=0) <sup>e</sup>                 | — <sup>b</sup>           | —                 | ND <sup>f</sup> | ND                         |
|                                                   | Tigecycline                                 | 1                        | 4                 | 0.06 – 4        | 89.4                       |
|                                                   | Levofloxacin                                | >4                       | >4                | 0.25 – >4       | 25.5                       |
|                                                   | Meropenem-nonsusceptible, MBL–negative (38) | Ceftazidime–avibactam    | 1                 | 16              | 0.06 – >128                |
| Ceftazidime                                       |                                             | 128                      | >128              | 0.5 – >128      | 7.9                        |
| Cefepime                                          |                                             | >16                      | >16               | 2 – >16         | 2.6                        |
| Aztreonam                                         |                                             | >128                     | >128              | 1 – >128        | 5.3                        |
| Piperacillin–tazobactam                           |                                             | >128                     | >128              | 1 – >128        | 7.9                        |
| Doripenem                                         |                                             | >4                       | >4                | 0.03 – >4       | 10.5                       |
| Imipenem                                          |                                             | >8                       | >8                | 0.12 – >8       | 5.3                        |
| Meropenem                                         |                                             | >8                       | >8                | 2 – >8          | 0                          |
| Amikacin                                          |                                             | 4                        | >32               | ≤0.25 – >32     | 71.1                       |
| Colistin (n=0) <sup>e</sup>                       |                                             | — <sup>b</sup>           | —                 | ND <sup>f</sup> | ND                         |
| Tigecycline                                       |                                             | 1                        | 4                 | 0.06 – 4        | 86.8                       |
| Levofloxacin                                      |                                             | >4                       | >4                | 0.25 – >4       | 23.7                       |
| Multidrug–resistant (239)                         |                                             | Ceftazidime–avibactam    | 0.25              | 4               | ≤0.015 – >128              |
|                                                   | Ceftazidime                                 | 64                       | >128              | 0.5 – >128      | 9.2                        |
|                                                   | Cefepime                                    | >16                      | >16               | ≤0.12 – >16     | 4.6                        |
|                                                   | Aztreonam                                   | 64                       | >128              | 4 – >128        | 0.4                        |
|                                                   | Piperacillin–tazobactam                     | 16                       | >128              | 0.5 – >128      | 55.2                       |
|                                                   | Doripenem                                   | 0.06                     | >4                | 0.015 – >4      | 82.9                       |
|                                                   | Imipenem                                    | 0.25                     | >8                | 0.06 – >8       | 75.7                       |
|                                                   | Meropenem                                   | 0.06                     | >8                | 0.015 – >8      | 82.0                       |
|                                                   | Amikacin                                    | 4                        | >32               | ≤0.25 – >32     | 76.6                       |
|                                                   | Colistin (n=0) <sup>e</sup>                 | — <sup>b</sup>           | —                 | ND <sup>f</sup> | ND                         |
|                                                   | Tigecycline                                 | 0.5                      | 2                 | 0.06 – 8        | 94.1                       |
|                                                   | Levofloxacin                                | >4                       | >4                | 0.12 – >4       | 7.1                        |
|                                                   | Multidrug–resistant, MBL–negative (231)     | Ceftazidime–avibactam    | 0.25              | 4               | ≤0.015 – >128              |
| Ceftazidime                                       |                                             | 64                       | >128              | 0.5 – >128      | 9.5                        |
| Cefepime                                          |                                             | >16                      | >16               | ≤0.12 – >16     | 4.8                        |
| Aztreonam                                         |                                             | 64                       | >128              | 4 – >128        | 0.4                        |
| Piperacillin–tazobactam                           |                                             | 16                       | >128              | 0.5 – >128      | 56.7                       |
| Doripenem                                         |                                             | 0.06                     | 4                 | 0.015 – >4      | 85.7                       |
| Imipenem                                          |                                             | 0.25                     | 8                 | 0.06 – >8       | 77.9                       |
| Meropenem                                         |                                             | 0.06                     | 8                 | 0.015 – >8      | 84.9                       |
| Amikacin                                          |                                             | 4                        | >32               | ≤0.25 – >32     | 77.1                       |
| Colistin (n=0) <sup>e</sup>                       |                                             | — <sup>b</sup>           | —                 | ND <sup>f</sup> | ND                         |
| Tigecycline                                       |                                             | 0.5                      | 2                 | 0.06 – 8        | 93.9                       |
| Levofloxacin                                      |                                             | >4                       | >4                | 0.12 – >4       | 6.5                        |
| <i>Escherichia coli</i>                           |                                             |                          |                   |                 |                            |
| All (471)                                         | Ceftazidime–avibactam                       | 0.12                     | 0.5               | ≤0.015 – >128   | 99.8                       |
|                                                   | Ceftazidime                                 | 1                        | 64                | 0.03 – >128     | 62.6                       |
|                                                   | Cefepime                                    | 4                        | >16               | ≤0.12 – >16     | 46.3                       |
|                                                   | Aztreonam                                   | 4                        | 64                | ≤0.015 – >128   | 50.7                       |
|                                                   | Piperacillin–tazobactam                     | 2                        | 16                | ≤0.25 – >128    | 90.5                       |
|                                                   | Doripenem                                   | 0.03                     | 0.06              | ≤0.008 – >4     | 98.7                       |
|                                                   | Imipenem                                    | 0.25                     | 0.5               | 0.06 – >8       | 97.5                       |
|                                                   | Meropenem                                   | 0.03                     | 0.06              | 0.008 – >8      | 98.1                       |
|                                                   | Amikacin                                    | 4                        | 16                | 0.5 – >32       | 94.5                       |
|                                                   | Colistin (n=0) <sup>e</sup>                 | — <sup>b</sup>           | —                 | ND <sup>f</sup> | ND                         |
|                                                   | Tigecycline                                 | 0.25                     | 0.5               | 0.06 – 2        | 100                        |
|                                                   | Levofloxacin                                | >4                       | >4                | ≤0.03 – >4      | 37.8                       |
|                                                   | All, MBL–negative (470)                     | Ceftazidime–avibactam    | 0.12              | 0.5             | ≤0.015 – 8                 |

| Phenotype/Organism (no. of isolates) <sup>b</sup> | Antimicrobial agent         | MIC (µg/ml) <sup>c</sup> |                   |                 | % Susceptible <sup>d</sup> |
|---------------------------------------------------|-----------------------------|--------------------------|-------------------|-----------------|----------------------------|
|                                                   |                             | MIC <sub>50</sub>        | MIC <sub>90</sub> | Range           |                            |
|                                                   | Ceftazidime                 | 1                        | 64                | 0.03 – >128     | 62.8                       |
|                                                   | Cefepime                    | 4                        | >16               | ≤0.12 – >16     | 46.4                       |
|                                                   | Aztreonam                   | 4                        | 64                | ≤0.015 – >128   | 50.9                       |
|                                                   | Piperacillin–tazobactam     | 2                        | 16                | ≤0.25 – >128    | 90.6                       |
|                                                   | Doripenem                   | 0.03                     | 0.06              | ≤0.008 – >4     | 98.9                       |
|                                                   | Imipenem                    | 0.25                     | 0.5               | 0.06 – >8       | 97.7                       |
|                                                   | Meropenem                   | 0.03                     | 0.06              | 0.008 – 8       | 98.3                       |
|                                                   | Amikacin                    | 4                        | 16                | 0.5 – >32       | 94.5                       |
|                                                   | Colistin (n=0) <sup>e</sup> | — <sup>b</sup>           | —                 | ND <sup>f</sup> | ND                         |
|                                                   | Tigecycline                 | 0.25                     | 0.5               | 0.06 – 2        | 100                        |
|                                                   | Levofloxacin                | >4                       | >4                | ≤0.03 – >4      | 37.9                       |
| Ceftazidime-nonsusceptible (176)                  | Ceftazidime–avibactam       | 0.25                     | 1                 | ≤0.015 – >128   | 99.4                       |
|                                                   | Ceftazidime                 | 32                       | >128              | 8 – >128        | 0                          |
|                                                   | Cefepime                    | >16                      | >16               | ≤0.12 – >16     | 8.5                        |
|                                                   | Aztreonam                   | 64                       | >128              | 1 – >128        | 2.3                        |
|                                                   | Piperacillin–tazobactam     | 8                        | 128               | 0.5 – >128      | 77.8                       |
|                                                   | Doripenem                   | 0.03                     | 0.12              | 0.015 – >4      | 97.2                       |
|                                                   | Imipenem                    | 0.25                     | 0.5               | 0.06 – >8       | 93.8                       |
|                                                   | Meropenem                   | 0.03                     | 0.12              | 0.015 – >8      | 96.0                       |
|                                                   | Amikacin                    | 4                        | 32                | 0.5 – >32       | 89.2                       |
|                                                   | Colistin (n=0) <sup>e</sup> | — <sup>b</sup>           | —                 | ND <sup>f</sup> | ND                         |
|                                                   | Tigecycline                 | 0.25                     | 1                 | 0.06 – 2        | 100                        |
|                                                   | Levofloxacin                | >4                       | >4                | ≤0.03 – >4      | 17.1                       |
| Ceftazidime-nonsusceptible, MBL–negative (175)    | Ceftazidime–avibactam       | 0.25                     | 1                 | ≤0.015 – 8      | 100                        |
|                                                   | Ceftazidime                 | 32                       | >128              | 8 – >128        | 0                          |
|                                                   | Cefepime                    | >16                      | >16               | ≤0.12 – >16     | 8.6                        |
|                                                   | Aztreonam                   | 64                       | >128              | 1 – >128        | 2.3                        |
|                                                   | Piperacillin–tazobactam     | 8                        | 128               | 0.5 – >128      | 78.3                       |
|                                                   | Doripenem                   | 0.03                     | 0.12              | 0.015 – >4      | 97.7                       |
|                                                   | Imipenem                    | 0.25                     | 0.5               | 0.06 – >8       | 94.3                       |
|                                                   | Meropenem                   | 0.03                     | 0.12              | 0.015 – 8       | 96.6                       |
|                                                   | Amikacin                    | 4                        | 32                | 0.5 – >32       | 89.1                       |
|                                                   | Colistin (n=0) <sup>e</sup> | — <sup>b</sup>           | —                 | ND <sup>f</sup> | ND                         |
|                                                   | Tigecycline                 | 0.25                     | 1                 | 0.06 – 2        | 100                        |
|                                                   | Levofloxacin                | >4                       | >4                | ≤0.03 – >4      | 17.1                       |
| Meropenem-nonsusceptible (9)                      | Ceftazidime–avibactam       | — <sup>b</sup>           | —                 | 0.06 – >128     | 88.9                       |
|                                                   | Ceftazidime                 | —                        | —                 | 0.5 – >128      | 22.2                       |
|                                                   | Cefepime                    | —                        | —                 | 2 – >16         | 11.1                       |
|                                                   | Aztreonam                   | —                        | —                 | 1 – >128        | 22.2                       |
|                                                   | Piperacillin–tazobactam     | —                        | —                 | 1 – >128        | 33.3                       |
|                                                   | Doripenem                   | —                        | —                 | 0.03 – >4       | 33.3                       |
|                                                   | Imipenem                    | —                        | —                 | 0.12 – >8       | 11.1                       |
|                                                   | Meropenem                   | —                        | —                 | 2 – >8          | 0                          |
|                                                   | Amikacin                    | —                        | —                 | 2 – >32         | 88.9                       |
|                                                   | Colistin (n=0) <sup>e</sup> | —                        | —                 | ND <sup>f</sup> | ND                         |
|                                                   | Tigecycline                 | —                        | —                 | 0.12 – 0.5      | 100                        |
|                                                   | Levofloxacin                | —                        | —                 | 1 – >4          | 11.1                       |
| Meropenem-nonsusceptible, MBL–negative (8)        | Ceftazidime–avibactam       | — <sup>b</sup>           | —                 | 0.06 – 4        | 100                        |
|                                                   | Ceftazidime                 | —                        | —                 | 0.5 – 128       | 25.0                       |
|                                                   | Cefepime                    | —                        | —                 | 2 – >16         | 12.5                       |
|                                                   | Aztreonam                   | —                        | —                 | 1 – >128        | 25.0                       |
|                                                   | Piperacillin–tazobactam     | —                        | —                 | 1 – >128        | 37.5                       |
|                                                   | Doripenem                   | —                        | —                 | 0.03 – >4       | 37.5                       |
|                                                   | Imipenem                    | —                        | —                 | 0.12 – >8       | 12.5                       |
|                                                   | Meropenem                   | —                        | —                 | 2 – 8           | 0                          |
|                                                   | Amikacin                    | —                        | —                 | 2 – >32         | 87.5                       |
|                                                   | Colistin (n=0) <sup>e</sup> | —                        | —                 | ND <sup>f</sup> | ND                         |
|                                                   | Tigecycline                 | —                        | —                 | 0.12 – 0.5      | 100                        |
|                                                   | Levofloxacin                | —                        | —                 | 1 – >4          | 12.5                       |

| Phenotype/Organism (no. of isolates) <sup>b</sup> | Antimicrobial agent                     | MIC (µg/ml) <sup>c</sup> |                   |                 | % Susceptible <sup>d</sup> |      |
|---------------------------------------------------|-----------------------------------------|--------------------------|-------------------|-----------------|----------------------------|------|
|                                                   |                                         | MIC <sub>50</sub>        | MIC <sub>90</sub> | Range           |                            |      |
| Multidrug-resistant (145)                         | Ceftazidime-avibactam                   | 0.25                     | 1                 | ≤0.015 – >128   | 99.3                       |      |
|                                                   | Ceftazidime                             | 32                       | >128              | 1 – >128        | 11.7                       |      |
|                                                   | Cefepime                                | >16                      | >16               | 0.25 – >16      | 3.5                        |      |
|                                                   | Aztreonam                               | 64                       | >128              | 16 – >128       | 0                          |      |
|                                                   | Piperacillin-tazobactam                 | 8                        | >128              | 0.5 – >128      | 75.2                       |      |
|                                                   | Doripenem                               | 0.03                     | 0.12              | 0.015 – >4      | 96.6                       |      |
|                                                   | Imipenem                                | 0.25                     | 0.5               | 0.06 – >8       | 94.5                       |      |
|                                                   | Meropenem                               | 0.03                     | 0.12              | 0.015 – >8      | 95.9                       |      |
|                                                   | Amikacin                                | 4                        | >32               | 1 – >32         | 85.5                       |      |
|                                                   | Colistin (n=0) <sup>e</sup>             | — <sup>b</sup>           | —                 | ND <sup>f</sup> | ND                         |      |
|                                                   | Tigecycline                             | 0.25                     | 1                 | 0.06 – 2        | 100                        |      |
|                                                   | Levofloxacin                            | >4                       | >4                | >4 – >4         | 0                          |      |
|                                                   | Multidrug-resistant, MBL-negative (144) | Ceftazidime-avibactam    | 0.25              | 1               | ≤0.015 – 8                 | 100  |
|                                                   |                                         | Ceftazidime              | 32                | >128            | 1 – >128                   | 11.8 |
| Cefepime                                          |                                         | >16                      | >16               | 0.25 – >16      | 3.5                        |      |
| Aztreonam                                         |                                         | 64                       | >128              | 16 – >128       | 0                          |      |
| Piperacillin-tazobactam                           |                                         | 8                        | >128              | 0.5 – >128      | 75.7                       |      |
| Doripenem                                         |                                         | 0.03                     | 0.12              | 0.015 – >4      | 97.2                       |      |
| Imipenem                                          |                                         | 0.25                     | 0.5               | 0.06 – >8       | 95.1                       |      |
| Meropenem                                         |                                         | 0.03                     | 0.12              | 0.015 – 8       | 96.5                       |      |
| Amikacin                                          |                                         | 4                        | >32               | 1 – >32         | 85.4                       |      |
| Colistin (n=0) <sup>e</sup>                       |                                         | — <sup>b</sup>           | —                 | ND <sup>f</sup> | ND                         |      |
| Tigecycline                                       |                                         | 0.25                     | 1                 | 0.06 – 2        | 100                        |      |
| Levofloxacin                                      |                                         | >4                       | >4                | >4 – >4         | 0                          |      |
| <i>Klebsiella pneumoniae</i><br>All (279)         |                                         | Ceftazidime-avibactam    | 0.12              | 1               | ≤0.015 – >128              | 98.6 |
|                                                   |                                         | Ceftazidime              | 0.5               | 128             | ≤0.015 – >128              | 68.8 |
|                                                   | Cefepime                                | ≤0.12                    | >16               | ≤0.12 – >16     | 65.6                       |      |
|                                                   | Aztreonam                               | 0.25                     | 128               | ≤0.015 – >128   | 65.6                       |      |
|                                                   | Piperacillin-tazobactam                 | 4                        | >128              | 0.5 – >128      | 79.9                       |      |
|                                                   | Doripenem                               | 0.06                     | 0.25              | 0.015 – >4      | 92.8                       |      |
|                                                   | Imipenem                                | 0.25                     | 1                 | ≤0.03 – >8      | 90.3                       |      |
|                                                   | Meropenem                               | 0.03                     | 0.12              | 0.015 – >8      | 92.8                       |      |
|                                                   | Amikacin                                | 1                        | 4                 | ≤0.25 – >32     | 91.8                       |      |
|                                                   | Colistin (n=0) <sup>e</sup>             | — <sup>b</sup>           | —                 | ND <sup>f</sup> | ND                         |      |
|                                                   | Tigecycline                             | 1                        | 2                 | ≤0.015 – 8      | 93.9                       |      |
|                                                   | Levofloxacin                            | 0.5                      | >4                | ≤0.03 – >4      | 74.2                       |      |
|                                                   | All, MBL-negative (277)                 | Ceftazidime-avibactam    | 0.12              | 1               | ≤0.015 – >128              | 99.3 |
|                                                   |                                         | Ceftazidime              | 0.5               | 128             | ≤0.015 – >128              | 69.3 |
| Cefepime                                          |                                         | ≤0.12                    | >16               | ≤0.12 – >16     | 66.1                       |      |
| Aztreonam                                         |                                         | 0.25                     | 128               | ≤0.015 – >128   | 66.1                       |      |
| Piperacillin-tazobactam                           |                                         | 4                        | >128              | 0.5 – >128      | 80.5                       |      |
| Doripenem                                         |                                         | 0.06                     | 0.25              | 0.015 – >4      | 93.5                       |      |
| Imipenem                                          |                                         | 0.25                     | 1                 | ≤0.03 – >8      | 90.6                       |      |
| Meropenem                                         |                                         | 0.03                     | 0.12              | 0.015 – >8      | 93.5                       |      |
| Amikacin                                          |                                         | 1                        | 4                 | ≤0.25 – >32     | 91.7                       |      |
| Colistin (n=0) <sup>e</sup>                       |                                         | — <sup>b</sup>           | —                 | ND <sup>f</sup> | ND                         |      |
| Tigecycline                                       |                                         | 1                        | 2                 | ≤0.015 – 8      | 93.9                       |      |
| Levofloxacin                                      |                                         | 0.5                      | >4                | ≤0.03 – >4      | 74.4                       |      |
| Ceftazidime-nonsusceptible (87)                   |                                         | Ceftazidime-avibactam    | 0.5               | 2               | ≤0.015 – >128              | 95.4 |
|                                                   |                                         | Ceftazidime              | 64                | >128            | 8 – >128                   | 0    |
|                                                   | Cefepime                                | >16                      | >16               | ≤0.12 – >16     | 14.9                       |      |
|                                                   | Aztreonam                               | 64                       | >128              | 1 – >128        | 6.9                        |      |
|                                                   | Piperacillin-tazobactam                 | 64                       | >128              | 1 – >128        | 41.4                       |      |
|                                                   | Doripenem                               | 0.12                     | >4                | 0.015 – >4      | 77.0                       |      |
|                                                   | Imipenem                                | 0.5                      | >8                | ≤0.03 – >8      | 70.1                       |      |
|                                                   | Meropenem                               | 0.06                     | >8                | 0.03 – >8       | 77.0                       |      |
|                                                   | Amikacin                                | 2                        | >32               | ≤0.25 – >32     | 73.6                       |      |
|                                                   | Colistin (n=0) <sup>e</sup>             | — <sup>b</sup>           | —                 | ND <sup>f</sup> | ND                         |      |
|                                                   | Tigecycline                             | 1                        | 2                 | 0.06 – 4        | 92.0                       |      |

| Phenotype/Organism (no. of isolates) <sup>b</sup> | Antimicrobial agent         | MIC (µg/ml) <sup>c</sup> |                   |                 | % Susceptible <sup>d</sup> |
|---------------------------------------------------|-----------------------------|--------------------------|-------------------|-----------------|----------------------------|
|                                                   |                             | MIC <sub>50</sub>        | MIC <sub>90</sub> | Range           |                            |
|                                                   | Levofloxacin                | >4                       | >4                | ≤0.03 – >4      | 37.9                       |
| Ceftazidime-nonsusceptible, MBL–negative (85)     | Ceftazidime–avibactam       | 0.5                      | 2                 | ≤0.015 – >128   | 97.7                       |
|                                                   | Ceftazidime                 | 64                       | >128              | 8 – >128        | 0                          |
|                                                   | Cefepime                    | >16                      | >16               | ≤0.12 – >16     | 15.3                       |
|                                                   | Aztreonam                   | 64                       | >128              | 1 – >128        | 7.1                        |
|                                                   | Piperacillin–tazobactam     | 32                       | >128              | 1 – >128        | 42.4                       |
|                                                   | Doripenem                   | 0.12                     | >4                | 0.015 – >4      | 78.8                       |
|                                                   | Imipenem                    | 0.5                      | >8                | ≤0.03 – >8      | 70.6                       |
|                                                   | Meropenem                   | 0.06                     | >8                | 0.03 – >8       | 78.8                       |
|                                                   | Amikacin                    | 2                        | >32               | ≤0.25 – >32     | 72.9                       |
|                                                   | Colistin (n=0) <sup>e</sup> | — <sup>b</sup>           | —                 | ND <sup>f</sup> | ND                         |
|                                                   | Tigecycline                 | 1                        | 2                 | 0.06 – 4        | 91.8                       |
|                                                   | Levofloxacin                | >4                       | >4                | ≤0.03 – >4      | 37.7                       |
| Meropenem-nonsusceptible (20)                     | Ceftazidime–avibactam       | 2                        | >128              | 0.5 – >128      | 85.0                       |
|                                                   | Ceftazidime                 | >128                     | >128              | 16 – >128       | 0                          |
|                                                   | Cefepime                    | >16                      | >16               | 16 – >16        | 0                          |
|                                                   | Aztreonam                   | >128                     | >128              | 32 – >128       | 0                          |
|                                                   | Piperacillin–tazobactam     | >128                     | >128              | >128 – >128     | 0                          |
|                                                   | Doripenem                   | >4                       | >4                | 2 – >4          | 0                          |
|                                                   | Imipenem                    | >8                       | >8                | 1 – >8          | 5.0                        |
|                                                   | Meropenem                   | >8                       | >8                | 4 – >8          | 0                          |
|                                                   | Amikacin                    | 2                        | >32               | ≤0.25 – >32     | 65.0                       |
|                                                   | Colistin (n=0) <sup>e</sup> | — <sup>b</sup>           | —                 | ND <sup>f</sup> | ND                         |
|                                                   | Tigecycline                 | 1                        | 2                 | 0.06 – 4        | 95.0                       |
|                                                   | Levofloxacin                | >4                       | >4                | 0.5 – >4        | 15.0                       |
| Meropenem-nonsusceptible, MBL–negative (18)       | Ceftazidime–avibactam       | 2                        | 4                 | 0.5 – >128      | 94.4                       |
|                                                   | Ceftazidime                 | 128                      | >128              | 16 – >128       | 0                          |
|                                                   | Cefepime                    | >16                      | >16               | 16 – >16        | 0                          |
|                                                   | Aztreonam                   | >128                     | >128              | 32 – >128       | 0                          |
|                                                   | Piperacillin–tazobactam     | >128                     | >128              | >128 – >128     | 0                          |
|                                                   | Doripenem                   | >4                       | >4                | 4 – >4          | 0                          |
|                                                   | Imipenem                    | >8                       | >8                | 4 – >8          | 0                          |
|                                                   | Meropenem                   | >8                       | >8                | 8 – >8          | 0                          |
|                                                   | Amikacin                    | 2                        | >32               | ≤0.25 – >32     | 61.1                       |
|                                                   | Colistin (n=0) <sup>e</sup> | — <sup>b</sup>           | —                 | ND <sup>f</sup> | ND                         |
|                                                   | Tigecycline                 | 1                        | 2                 | 0.06 – 4        | 94.4                       |
|                                                   | Levofloxacin                | >4                       | >4                | 0.5 – >4        | 11.1                       |
| Multidrug–resistant (52)                          | Ceftazidime–avibactam       | 1                        | 4                 | 0.06 – >128     | 92.3                       |
|                                                   | Ceftazidime                 | 128                      | >128              | 4 – >128        | 3.9                        |
|                                                   | Cefepime                    | >16                      | >16               | 0.25 – >16      | 3.9                        |
|                                                   | Aztreonam                   | 128                      | >128              | 16 – >128       | 0                          |
|                                                   | Piperacillin–tazobactam     | >128                     | >128              | 4 – >128        | 26.9                       |
|                                                   | Doripenem                   | 0.25                     | >4                | 0.015 – >4      | 61.5                       |
|                                                   | Imipenem                    | 1                        | >8                | 0.12 – >8       | 53.9                       |
|                                                   | Meropenem                   | 0.12                     | >8                | 0.015 – >8      | 61.5                       |
|                                                   | Amikacin                    | 4                        | >32               | ≤0.25 – >32     | 57.7                       |
|                                                   | Colistin (n=0) <sup>e</sup> | — <sup>b</sup>           | —                 | ND <sup>f</sup> | ND                         |
|                                                   | Tigecycline                 | 1                        | 2                 | 0.06 – 4        | 90.4                       |
|                                                   | Levofloxacin                | >4                       | >4                | 0.5 – >4        | 5.8                        |
| Multidrug–resistant, MBL–negative (50)            | Ceftazidime–avibactam       | 0.5                      | 4                 | 0.06 – >128     | 96.0                       |
|                                                   | Ceftazidime                 | 128                      | >128              | 4 – >128        | 4.0                        |
|                                                   | Cefepime                    | >16                      | >16               | 0.25 – >16      | 4.0                        |
|                                                   | Aztreonam                   | 128                      | >128              | 16 – >128       | 0                          |
|                                                   | Piperacillin–tazobactam     | >128                     | >128              | 4 – >128        | 28.0                       |
|                                                   | Doripenem                   | 0.12                     | >4                | 0.015 – >4      | 64.0                       |
|                                                   | Imipenem                    | 1                        | >8                | 0.12 – >8       | 54.0                       |
|                                                   | Meropenem                   | 0.06                     | >8                | 0.015 – >8      | 64.0                       |
|                                                   | Amikacin                    | 4                        | >32               | ≤0.25 – >32     | 56.0                       |
|                                                   | Colistin (n=0) <sup>e</sup> | — <sup>b</sup>           | —                 | ND <sup>f</sup> | ND                         |

| Phenotype/Organism (no. of isolates) <sup>b</sup> | Antimicrobial agent         | MIC (µg/ml) <sup>c</sup> |                   |                 | % Susceptible <sup>d</sup> |
|---------------------------------------------------|-----------------------------|--------------------------|-------------------|-----------------|----------------------------|
|                                                   |                             | MIC <sub>50</sub>        | MIC <sub>90</sub> | Range           |                            |
|                                                   | Tigecycline                 | 1                        | 2                 | 0.06 – 4        | 90.0                       |
|                                                   | Levofloxacin                | >4                       | >4                | 0.5 – >4        | 4.0                        |
| <i>Klebsiella oxytoca</i>                         |                             |                          |                   |                 |                            |
| All (70)                                          | Ceftazidime–avibactam       | 0.12                     | 0.5               | ≤0.015 – 128    | 94.3                       |
|                                                   | Ceftazidime                 | 0.12                     | 32                | ≤0.015 – >128   | 81.4                       |
|                                                   | Cefepime                    | ≤0.12                    | 8                 | ≤0.12 – >16     | 85.7                       |
|                                                   | Aztreonam                   | 0.25                     | 32                | ≤0.015 – >128   | 74.3                       |
|                                                   | Piperacillin–tazobactam     | 2                        | >128              | ≤0.25 – >128    | 84.3                       |
|                                                   | Doripenem                   | 0.06                     | 0.12              | 0.015 – >4      | 94.3                       |
|                                                   | Imipenem                    | 0.25                     | 1                 | 0.06 – >8       | 91.4                       |
|                                                   | Meropenem                   | 0.03                     | 0.06              | 0.015 – >8      | 94.3                       |
|                                                   | Amikacin                    | 1                        | 4                 | 0.5 – >32       | 92.9                       |
|                                                   | Colistin (n=0) <sup>e</sup> | — <sup>b</sup>           | —                 | ND <sup>f</sup> | ND                         |
|                                                   | Tigecycline                 | 0.5                      | 1                 | 0.06 – 4        | 98.6                       |
|                                                   | Levofloxacin                | 0.12                     | 2                 | ≤0.03 – >4      | 90.0                       |
| All, MBL–negative (67)                            | Ceftazidime–avibactam       | 0.12                     | 0.25              | ≤0.015 – 16     | 98.5                       |
|                                                   | Ceftazidime                 | 0.12                     | 32                | ≤0.015 – >128   | 85.1                       |
|                                                   | Cefepime                    | ≤0.12                    | 4                 | ≤0.12 – >16     | 89.6                       |
|                                                   | Aztreonam                   | 0.25                     | 32                | ≤0.015 – 128    | 76.1                       |
|                                                   | Piperacillin–tazobactam     | 2                        | 128               | ≤0.25 – >128    | 88.1                       |
|                                                   | Doripenem                   | 0.06                     | 0.06              | 0.015 – 2       | 98.5                       |
|                                                   | Imipenem                    | 0.25                     | 0.5               | 0.06 – 8        | 95.5                       |
|                                                   | Meropenem                   | 0.03                     | 0.06              | 0.015 – 8       | 98.5                       |
|                                                   | Amikacin                    | 1                        | 4                 | 0.5 – >32       | 95.5                       |
|                                                   | Colistin (n=0) <sup>e</sup> | — <sup>b</sup>           | —                 | ND <sup>f</sup> | ND                         |
|                                                   | Tigecycline                 | 0.25                     | 1                 | 0.06 – 4        | 98.5                       |
|                                                   | Levofloxacin                | 0.12                     | 2                 | ≤0.03 – >4      | 92.5                       |
| Ceftazidime-nonsusceptible (13)                   | Ceftazidime–avibactam       | 0.25                     | 128               | ≤0.015 – 128    | 69.2                       |
|                                                   | Ceftazidime                 | 32                       | >128              | 16 – >128       | 0                          |
|                                                   | Cefepime                    | 4                        | >16               | 0.5 – >16       | 46.2                       |
|                                                   | Aztreonam                   | 32                       | >128              | 1 – >128        | 7.7                        |
|                                                   | Piperacillin–tazobactam     | 16                       | >128              | 1 – >128        | 53.9                       |
|                                                   | Doripenem                   | 0.12                     | >4                | 0.06 – >4       | 69.2                       |
|                                                   | Imipenem                    | 1                        | >8                | 0.25 – >8       | 61.5                       |
|                                                   | Meropenem                   | 0.06                     | >8                | 0.03 – >8       | 69.2                       |
|                                                   | Amikacin                    | 2                        | >32               | 1 – >32         | 69.2                       |
|                                                   | Colistin (n=0) <sup>e</sup> | — <sup>b</sup>           | —                 | ND <sup>f</sup> | ND                         |
|                                                   | Tigecycline                 | 0.5                      | 1                 | 0.25 – 1        | 100                        |
|                                                   | Levofloxacin                | 1                        | >4                | 0.5 – >4        | 69.2                       |
| Ceftazidime-nonsusceptible, MBL–negative (10)     | Ceftazidime–avibactam       | 0.25                     | 4                 | ≤0.015 – 16     | 90.0                       |
|                                                   | Ceftazidime                 | 32                       | 128               | 16 – >128       | 0                          |
|                                                   | Cefepime                    | 2                        | 16                | 0.5 – >16       | 60.0                       |
|                                                   | Aztreonam                   | 32                       | 64                | 16 – 128        | 0                          |
|                                                   | Piperacillin–tazobactam     | 2                        | >128              | 1 – >128        | 70.0                       |
|                                                   | Doripenem                   | 0.06                     | 0.25              | 0.06 – 2        | 90.0                       |
|                                                   | Imipenem                    | 0.5                      | 4                 | 0.25 – 8        | 80.0                       |
|                                                   | Meropenem                   | 0.06                     | 0.12              | 0.03 – 8        | 90.0                       |
|                                                   | Amikacin                    | 2                        | 32                | 1 – >32         | 80.0                       |
|                                                   | Colistin (n=0) <sup>e</sup> | — <sup>b</sup>           | —                 | ND <sup>f</sup> | ND                         |
|                                                   | Tigecycline                 | 0.25                     | 1                 | 0.25 – 1        | 100                        |
|                                                   | Levofloxacin                | 0.5                      | >4                | 0.5 – >4        | 80.0                       |
| Meropenem-nonsusceptible (4)                      | Ceftazidime–avibactam       | — <sup>b</sup>           | —                 | 16 – 128        | 0                          |
|                                                   | Ceftazidime                 | —                        | —                 | 128 – >128      | 0                          |
|                                                   | Cefepime                    | —                        | —                 | 4 – >16         | 0                          |
|                                                   | Aztreonam                   | —                        | —                 | 1 – >128        | 25.0                       |
|                                                   | Piperacillin–tazobactam     | —                        | —                 | 128 – >128      | 0                          |
|                                                   | Doripenem                   | —                        | —                 | 2 – >4          | 0                          |
|                                                   | Imipenem                    | —                        | —                 | 4 – >4          | 0                          |
|                                                   | Meropenem                   | —                        | —                 | 4 – >8          | 0                          |

| Phenotype/Organism (no. of isolates) <sup>b</sup> | Antimicrobial agent         | MIC (µg/ml) <sup>c</sup> |                   |                 | % Susceptible <sup>d</sup> |
|---------------------------------------------------|-----------------------------|--------------------------|-------------------|-----------------|----------------------------|
|                                                   |                             | MIC <sub>50</sub>        | MIC <sub>90</sub> | Range           |                            |
|                                                   | Amikacin                    | —                        | —                 | 2 – >32         | 50.0                       |
|                                                   | Colistin (n=0) <sup>e</sup> | —                        | —                 | ND <sup>f</sup> | ND                         |
|                                                   | Tigecycline                 | —                        | —                 | 0.5 – 1         | 100                        |
|                                                   | Levofloxacin                | —                        | —                 | 1 – 4           | 50.0                       |
| Meropenem-nonsusceptible, MBL–negative (1)        | Ceftazidime–avibactam       | — <sup>b</sup>           | —                 | 16              | 0                          |
|                                                   | Ceftazidime                 | —                        | —                 | 128             | 0                          |
|                                                   | Cefepime                    | —                        | —                 | 4               | 0                          |
|                                                   | Aztreonam                   | —                        | —                 | 64              | 0                          |
|                                                   | Piperacillin–tazobactam     | —                        | —                 | 128             | 0                          |
|                                                   | Doripenem                   | —                        | —                 | 2               | 0                          |
|                                                   | Imipenem                    | —                        | —                 | 8               | 0                          |
|                                                   | Meropenem                   | —                        | —                 | 8               | 0                          |
|                                                   | Amikacin                    | —                        | —                 | 8               | 100                        |
|                                                   | Colistin (n=0) <sup>e</sup> | —                        | —                 | ND <sup>f</sup> | ND                         |
|                                                   | Tigecycline                 | —                        | —                 | 1               | 100                        |
|                                                   | Levofloxacin                | —                        | —                 | 2               | 100                        |
| Multidrug–resistant (6)                           | Ceftazidime–avibactam       | — <sup>b</sup>           | —                 | 0.25 – 128      | 50.0                       |
|                                                   | Ceftazidime                 | —                        | —                 | 16 – >128       | 0                          |
|                                                   | Cefepime                    | —                        | —                 | 0.5 – >16       | 16.7                       |
|                                                   | Aztreonam                   | —                        | —                 | 32 – >128       | 0                          |
|                                                   | Piperacillin–tazobactam     | —                        | —                 | 16 – >128       | 16.7                       |
|                                                   | Doripenem                   | —                        | —                 | 0.06 – >4       | 50.0                       |
|                                                   | Imipenem                    | —                        | —                 | 0.25 – >8       | 50.0                       |
|                                                   | Meropenem                   | —                        | —                 | 0.03 – >8       | 50.0                       |
|                                                   | Amikacin                    | —                        | —                 | 2 – >32         | 50.0                       |
|                                                   | Colistin (n=0) <sup>e</sup> | —                        | —                 | ND <sup>f</sup> | ND                         |
|                                                   | Tigecycline                 | —                        | —                 | 0.25 – 1        | 100                        |
|                                                   | Levofloxacin                | —                        | —                 | 1 – >4          | 50.0                       |
| Multidrug–resistant, MBL–negative (4)             | Ceftazidime–avibactam       | — <sup>b</sup>           | —                 | 0.25 – 16       | 75.0                       |
|                                                   | Ceftazidime                 | —                        | —                 | 16 – >128       | 0                          |
|                                                   | Cefepime                    | —                        | —                 | 0.5 – >16       | 25.0                       |
|                                                   | Aztreonam                   | —                        | —                 | 32 – 128        | 0                          |
|                                                   | Piperacillin–tazobactam     | —                        | —                 | 16 – >128       | 25.0                       |
|                                                   | Doripenem                   | —                        | —                 | 0.06 – 2        | 75.0                       |
|                                                   | Imipenem                    | —                        | —                 | 0.25 – 8        | 75.0                       |
|                                                   | Meropenem                   | —                        | —                 | 0.03 – 8        | 75.0                       |
|                                                   | Amikacin                    | —                        | —                 | 2 – >32         | 75.0                       |
|                                                   | Colistin (n=0) <sup>e</sup> | —                        | —                 | ND <sup>f</sup> | ND                         |
|                                                   | Tigecycline                 | —                        | —                 | 0.25 – 1        | 100                        |
|                                                   | Levofloxacin                | —                        | —                 | 1 – >4          | 75.0                       |
| <i>Enterobacter</i> spp.                          |                             |                          |                   |                 |                            |
| All (151) <sup>g</sup>                            | Ceftazidime–avibactam       | 0.25                     | 2                 | 0.03 – >128     | 98.0                       |
|                                                   | Ceftazidime                 | 1                        | >128              | 0.03 – >128     | 57.6                       |
|                                                   | Cefepime                    | 0.25                     | >16               | ≤0.12 – >16     | 76.8                       |
|                                                   | Aztreonam                   | 1                        | 64                | 0.03 – >128     | 57.6                       |
|                                                   | Piperacillin–tazobactam     | 4                        | >128              | 1 – >128        | 65.6                       |
|                                                   | Doripenem                   | 0.12                     | 0.5               | 0.03 – >4       | 94.7                       |
|                                                   | Imipenem                    | 1                        | 2                 | 0.12 – >8       | 76.2                       |
|                                                   | Meropenem                   | 0.06                     | 0.25              | 0.03 – >8       | 94.0                       |
|                                                   | Amikacin                    | 1                        | 4                 | 0.5 – >32       | 96.0                       |
|                                                   | Colistin (n=0) <sup>e</sup> | — <sup>b</sup>           | —                 | ND <sup>f</sup> | ND                         |
|                                                   | Tigecycline                 | 0.5                      | 2                 | 0.06 – 8        | 95.4                       |
|                                                   | Levofloxacin                | 0.06                     | >4                | ≤0.03 – >4      | 84.8                       |
| All, MBL–negative (148)                           | Ceftazidime–avibactam       | 0.25                     | 1                 | 0.03 – 16       | 99.3                       |
|                                                   | Ceftazidime                 | 1                        | 128               | 0.03 – >128     | 58.8                       |
|                                                   | Cefepime                    | 0.25                     | 16                | ≤0.12 – >16     | 78.4                       |
|                                                   | Aztreonam                   | 1                        | 64                | 0.03 – >128     | 58.8                       |
|                                                   | Piperacillin–tazobactam     | 4                        | >128              | 1 – >128        | 66.2                       |
|                                                   | Doripenem                   | 0.06                     | 0.25              | 0.03 – >4       | 96.0                       |



| Phenotype/Organism (no. of isolates) <sup>b</sup> | Antimicrobial agent         | MIC (μg/ml) <sup>c</sup> |                   |                 | % Susceptible <sup>d</sup> |
|---------------------------------------------------|-----------------------------|--------------------------|-------------------|-----------------|----------------------------|
|                                                   |                             | MIC <sub>50</sub>        | MIC <sub>90</sub> | Range           |                            |
|                                                   | Imipenem                    | 1                        | 2                 | 0.12 – >8       | 77.7                       |
|                                                   | Meropenem                   | 0.06                     | 0.25              | 0.03 – >8       | 95.3                       |
|                                                   | Amikacin                    | 1                        | 4                 | 0.5 – >32       | 96.0                       |
|                                                   | Colistin (n=0) <sup>e</sup> | — <sup>b</sup>           | —                 | ND <sup>f</sup> | ND                         |
|                                                   | Tigecycline                 | 0.5                      | 2                 | 0.06 – 8        | 95.3                       |
|                                                   | Levofloxacin                | 0.06                     | >4                | ≤0.03 – >4      | 85.1                       |
| Ceftazidime-nonsusceptible (64)                   | Ceftazidime–avibactam       | 1                        | 4                 | 0.06 – >128     | 95.3                       |
|                                                   | Ceftazidime                 | 64                       | >128              | 8 – >128        | 0                          |
|                                                   | Cefepime                    | 1                        | >16               | ≤0.12 – >16     | 57.8                       |
|                                                   | Aztreonam                   | 32                       | 128               | 2 – >128        | 7.8                        |
|                                                   | Piperacillin–tazobactam     | 64                       | >128              | 2 – >128        | 20.3                       |
|                                                   | Doripenem                   | 0.12                     | 4                 | 0.06 – >4       | 89.1                       |
|                                                   | Imipenem                    | 1                        | 4                 | 0.12 – >8       | 68.8                       |
|                                                   | Meropenem                   | 0.12                     | 2                 | 0.03 – >8       | 87.5                       |
|                                                   | Amikacin                    | 1                        | 16                | 0.5 – >32       | 92.2                       |
|                                                   | Colistin (n=0) <sup>e</sup> | — <sup>b</sup>           | —                 | ND <sup>f</sup> | ND                         |
|                                                   | Tigecycline                 | 1                        | 2                 | 0.06 – 8        | 90.6                       |
|                                                   | Levofloxacin                | 0.25                     | >4                | ≤0.03 – >4      | 71.9                       |
| Ceftazidime-nonsusceptible, MBL–negative (61)     | Ceftazidime–avibactam       | 1                        | 4                 | 0.06 – 16       | 98.4                       |
|                                                   | Ceftazidime                 | 64                       | >128              | 8 – >128        | 0                          |
|                                                   | Cefepime                    | 0.5                      | >16               | ≤0.12 – >16     | 60.7                       |
|                                                   | Aztreonam                   | 64                       | 128               | 2 – >128        | 8.2                        |
|                                                   | Piperacillin–tazobactam     | 64                       | >128              | 2 – >128        | 19.7                       |
|                                                   | Doripenem                   | 0.12                     | 1                 | 0.06 – >4       | 91.8                       |
|                                                   | Imipenem                    | 1                        | 2                 | 0.12 – >8       | 72.1                       |
|                                                   | Meropenem                   | 0.12                     | 1                 | 0.03 – >8       | 90.2                       |
|                                                   | Amikacin                    | 1                        | 16                | 0.5 – >32       | 91.8                       |
|                                                   | Colistin (n=0) <sup>e</sup> | — <sup>b</sup>           | —                 | ND <sup>f</sup> | ND                         |
|                                                   | Tigecycline                 | 1                        | 2                 | 0.06 – 8        | 90.2                       |
|                                                   | Levofloxacin                | 0.25                     | >4                | ≤0.03 – >4      | 72.1                       |
| Meropenem-nonsusceptible (9)                      | Ceftazidime–avibactam       | — <sup>b</sup>           | —                 | 1 – >128        | 66.7                       |
|                                                   | Ceftazidime                 | —                        | —                 | 2 – >128        | 11.1                       |
|                                                   | Cefepime                    | —                        | —                 | 8 – >16         | 0                          |
|                                                   | Aztreonam                   | —                        | —                 | 32 – >128       | 0                          |
|                                                   | Piperacillin–tazobactam     | —                        | —                 | 16 – >128       | 11.1                       |
|                                                   | Doripenem                   | —                        | —                 | 1 – >4          | 11.1                       |
|                                                   | Imipenem                    | —                        | —                 | 0.5 – >8        | 11.1                       |
|                                                   | Meropenem                   | —                        | —                 | 2 – >8          | 0                          |
|                                                   | Amikacin                    | —                        | —                 | 0.5 – >32       | 77.8                       |
|                                                   | Colistin (n=0) <sup>e</sup> | —                        | —                 | ND <sup>f</sup> | ND                         |
|                                                   | Tigecycline                 | —                        | —                 | 0.5 – 4         | 55.6                       |
|                                                   | Levofloxacin                | —                        | —                 | 0.25 – >4       | 44.4                       |
| Meropenem-nonsusceptible, MBL–negative (7)        | Ceftazidime–avibactam       | — <sup>b</sup>           | —                 | 1 – 16          | 85.7                       |
|                                                   | Ceftazidime                 | —                        | —                 | 2 – >128        | 14.3                       |
|                                                   | Cefepime                    | —                        | —                 | 8 – >16         | 0                          |
|                                                   | Aztreonam                   | —                        | —                 | 64 – >128       | 0                          |
|                                                   | Piperacillin–tazobactam     | —                        | —                 | 128 – >128      | 0                          |
|                                                   | Doripenem                   | —                        | —                 | 1 – >4          | 14.3                       |
|                                                   | Imipenem                    | —                        | —                 | 0.5 – >8        | 14.3                       |
|                                                   | Meropenem                   | —                        | —                 | 2 – >8          | 0                          |
|                                                   | Amikacin                    | —                        | —                 | 0.5 – >32       | 71.4                       |
|                                                   | Colistin (n=0) <sup>e</sup> | —                        | —                 | ND <sup>f</sup> | ND                         |
|                                                   | Tigecycline                 | —                        | —                 | 0.5 – 4         | 42.9                       |
|                                                   | Levofloxacin                | —                        | —                 | 0.25 – >4       | 42.9                       |
| Multidrug–resistant (17)                          | Ceftazidime–avibactam       | 4                        | >128              | 0.5 – >128      | 82.4                       |
|                                                   | Ceftazidime                 | >128                     | >128              | 2 – >128        | 5.9                        |
|                                                   | Cefepime                    | >16                      | >16               | 0.5 – >16       | 5.9                        |
|                                                   | Aztreonam                   | 128                      | >128              | 32 – >128       | 0                          |
|                                                   | Piperacillin–tazobactam     | >128                     | >128              | 8 – >128        | 11.8                       |

| Phenotype/Organism (no. of isolates) <sup>b</sup> | Antimicrobial agent         | MIC (µg/ml) <sup>c</sup> |                   |                 | % Susceptible <sup>d</sup> |
|---------------------------------------------------|-----------------------------|--------------------------|-------------------|-----------------|----------------------------|
|                                                   |                             | MIC <sub>50</sub>        | MIC <sub>90</sub> | Range           |                            |
|                                                   | Doripenem                   | 1                        | >4                | 0.12 – >4       | 52.9                       |
|                                                   | Imipenem                    | 2                        | >8                | 0.5 – >8        | 35.3                       |
|                                                   | Meropenem                   | 2                        | >8                | 0.12 – >8       | 47.1                       |
|                                                   | Amikacin                    | 4                        | >32               | 0.5 – >32       | 76.5                       |
|                                                   | Colistin (n=0) <sup>e</sup> | — <sup>b</sup>           | —                 | ND <sup>f</sup> | ND                         |
|                                                   | Tigecycline                 | 2                        | 4                 | 0.25 – 8        | 70.6                       |
|                                                   | Levofloxacin                | >4                       | >4                | 0.25 – >4       | 35.3                       |
| Multidrug-resistant, MBL-negative (15)            | Ceftazidime-avibactam       | 2                        | 8                 | 0.5 – 16        | 93.3                       |
|                                                   | Ceftazidime                 | >128                     | >128              | 2 – >128        | 6.7                        |
|                                                   | Cefepime                    | >16                      | >16               | 0.5 – >16       | 6.7                        |
|                                                   | Aztreonam                   | 128                      | >128              | 32 – >128       | 0                          |
|                                                   | Piperacillin-tazobactam     | >128                     | >128              | 8 – >128        | 6.7                        |
|                                                   | Doripenem                   | 1                        | >4                | 0.12 – >4       | 60.0                       |
|                                                   | Imipenem                    | 2                        | >8                | 0.5 – >8        | 40.0                       |
|                                                   | Meropenem                   | 0.5                      | >8                | 0.12 – >8       | 53.3                       |
|                                                   | Amikacin                    | 4                        | >32               | 0.5 – >32       | 73.3                       |
|                                                   | Colistin (n=0) <sup>e</sup> | — <sup>b</sup>           | —                 | ND <sup>f</sup> | ND                         |
|                                                   | Tigecycline                 | 2                        | 4                 | 0.25 – 8        | 66.7                       |
|                                                   | Levofloxacin                | >4                       | >4                | 0.25 – >4       | 33.3                       |
| <i>Citrobacter</i> spp.<br>All (85) <sup>h</sup>  | Ceftazidime-avibactam       | 0.25                     | 0.5               | ≤0.015 – >128   | 97.7                       |
|                                                   | Ceftazidime                 | 4                        | 128               | 0.12 – >128     | 54.1                       |
|                                                   | Cefepime                    | 0.5                      | >16               | ≤0.12 – >16     | 72.9                       |
|                                                   | Aztreonam                   | 8                        | 64                | 0.03 – >128     | 49.4                       |
|                                                   | Piperacillin-tazobactam     | 8                        | >128              | 1 – >128        | 65.9                       |
|                                                   | Doripenem                   | 0.06                     | 0.12              | ≤0.008 – >4     | 96.5                       |
|                                                   | Imipenem                    | 0.5                      | 2                 | 0.12 – >8       | 87.1                       |
|                                                   | Meropenem                   | 0.03                     | 0.12              | 0.008 – >8      | 96.5                       |
|                                                   | Amikacin                    | 2                        | 8                 | 0.5 – >32       | 95.3                       |
|                                                   | Colistin (n=0) <sup>e</sup> | — <sup>b</sup>           | —                 | ND <sup>f</sup> | ND                         |
|                                                   | Tigecycline                 | 0.5                      | 2                 | 0.06 – 4        | 98.8                       |
|                                                   | Levofloxacin                | 0.5                      | >4                | ≤0.03 – >4      | 70.6                       |
| All, MBL-negative (84)                            | Ceftazidime-avibactam       | 0.25                     | 0.5               | ≤0.015 – 128    | 98.8                       |
|                                                   | Ceftazidime                 | 4                        | 128               | 0.12 – >128     | 54.8                       |
|                                                   | Cefepime                    | 0.25                     | 16                | ≤0.12 – >16     | 73.8                       |
|                                                   | Aztreonam                   | 4                        | 64                | 0.03 – >128     | 50.0                       |
|                                                   | Piperacillin-tazobactam     | 8                        | 128               | 1 – >128        | 66.7                       |
|                                                   | Doripenem                   | 0.06                     | 0.12              | ≤0.008 – >4     | 97.6                       |
|                                                   | Imipenem                    | 0.5                      | 2                 | 0.12 – >8       | 88.1                       |
|                                                   | Meropenem                   | 0.03                     | 0.12              | 0.008 – >8      | 97.6                       |
|                                                   | Amikacin                    | 2                        | 8                 | 0.5 – >32       | 96.4                       |
|                                                   | Colistin (n=0) <sup>e</sup> | — <sup>b</sup>           | —                 | ND <sup>f</sup> | ND                         |
|                                                   | Tigecycline                 | 0.5                      | 2                 | 0.06 – 4        | 98.8                       |
|                                                   | Levofloxacin                | 0.5                      | >4                | ≤0.03 – >4      | 71.4                       |
| Ceftazidime-nonsusceptible (39)                   | Ceftazidime-avibactam       | 0.5                      | 1                 | 0.03 – >128     | 94.9                       |
|                                                   | Ceftazidime                 | 128                      | >128              | 8 – >128        | 0                          |
|                                                   | Cefepime                    | 2                        | >16               | ≤0.12 – >16     | 61.5                       |
|                                                   | Aztreonam                   | 32                       | 128               | 1 – >128        | 7.7                        |
|                                                   | Piperacillin-tazobactam     | 32                       | >128              | 2 – >128        | 28.2                       |
|                                                   | Doripenem                   | 0.06                     | 0.12              | 0.03 – >4       | 92.3                       |
|                                                   | Imipenem                    | 1                        | 2                 | 0.25 – >8       | 76.9                       |
|                                                   | Meropenem                   | 0.06                     | 0.25              | 0.03 – >8       | 92.3                       |
|                                                   | Amikacin                    | 2                        | 16                | 0.5 – >32       | 92.3                       |
|                                                   | Colistin (n=0) <sup>e</sup> | — <sup>b</sup>           | —                 | ND <sup>f</sup> | ND                         |
|                                                   | Tigecycline                 | 1                        | 2                 | 0.12 – 2        | 100                        |
|                                                   | Levofloxacin                | 1                        | >4                | 0.12 – >4       | 59.0                       |
| Ceftazidime-nonsusceptible, MBL-negative (38)     | Ceftazidime-avibactam       | 0.5                      | 1                 | 0.03 – 128      | 97.4                       |
|                                                   | Ceftazidime                 | 64                       | 128               | 8 – >128        | 0                          |
|                                                   | Cefepime                    | 2                        | >16               | ≤0.12 – >16     | 63.2                       |

| Phenotype/Organism (no. of isolates) <sup>b</sup> | Antimicrobial agent         | MIC (µg/ml) <sup>c</sup> |                   |                 | % Susceptible <sup>d</sup> |
|---------------------------------------------------|-----------------------------|--------------------------|-------------------|-----------------|----------------------------|
|                                                   |                             | MIC <sub>50</sub>        | MIC <sub>90</sub> | Range           |                            |
|                                                   | Aztreonam                   | 32                       | 128               | 1 – >128        | 7.9                        |
|                                                   | Piperacillin–tazobactam     | 32                       | >128              | 2 – >128        | 29.0                       |
|                                                   | Doripenem                   | 0.06                     | 0.12              | 0.03 – >4       | 94.7                       |
|                                                   | Imipenem                    | 1                        | 2                 | 0.25 – >8       | 79.0                       |
|                                                   | Meropenem                   | 0.06                     | 0.12              | 0.03 – >8       | 94.7                       |
|                                                   | Amikacin                    | 2                        | 16                | 0.5 – >32       | 94.7                       |
|                                                   | Colistin (n=0) <sup>e</sup> | — <sup>b</sup>           | —                 | ND <sup>f</sup> | ND                         |
|                                                   | Tigecycline                 | 1                        | 2                 | 0.12 – 2        | 100                        |
|                                                   | Levofloxacin                | 1                        | >4                | 0.12 – >4       | 60.5                       |
| Meropenem-nonsusceptible (3)                      | Ceftazidime–avibactam       | — <sup>b</sup>           | —                 | 0.25 – >128     | 33.3                       |
|                                                   | Ceftazidime                 | —                        | —                 | 16 – >128       | 0                          |
|                                                   | Cefepime                    | —                        | —                 | >16 – >16       | 0                          |
|                                                   | Aztreonam                   | —                        | —                 | 64 – >128       | 0                          |
|                                                   | Piperacillin–tazobactam     | —                        | —                 | >128 – >128     | 0                          |
|                                                   | Doripenem                   | —                        | —                 | 4 – >4          | 0                          |
|                                                   | Imipenem                    | —                        | —                 | 2 – >8          | 0                          |
|                                                   | Meropenem                   | —                        | —                 | 8 – >8          | 0                          |
|                                                   | Amikacin                    | —                        | —                 | 4 – >32         | 66.7                       |
|                                                   | Colistin (n=0) <sup>e</sup> | —                        | —                 | ND <sup>f</sup> | ND                         |
|                                                   | Tigecycline                 | —                        | —                 | 0.5 – 1         | 100                        |
|                                                   | Levofloxacin                | —                        | —                 | 1 – >4          | 33.3                       |
| Meropenem-nonsusceptible, MBL–negative (2)        | Ceftazidime–avibactam       | — <sup>b</sup>           | —                 | 0.25 – 128      | 50.0                       |
|                                                   | Ceftazidime                 | —                        | —                 | 16 – 128        | 0                          |
|                                                   | Cefepime                    | —                        | —                 | >16 – >16       | 0                          |
|                                                   | Aztreonam                   | —                        | —                 | 64 – >128       | 0                          |
|                                                   | Piperacillin–tazobactam     | —                        | —                 | >128 – >128     | 0                          |
|                                                   | Doripenem                   | —                        | —                 | 4 – >4          | 0                          |
|                                                   | Imipenem                    | —                        | —                 | 2 – >8          | 0                          |
|                                                   | Meropenem                   | —                        | —                 | 8 – >8          | 0                          |
|                                                   | Amikacin                    | —                        | —                 | 4 – 8           | 100                        |
|                                                   | Colistin (n=0) <sup>e</sup> | —                        | —                 | ND <sup>f</sup> | ND                         |
|                                                   | Tigecycline                 | —                        | —                 | 0.5 – 1         | 100                        |
|                                                   | Levofloxacin                | —                        | —                 | 1 – >4          | 50.0                       |
| Multidrug–resistant (11)                          | Ceftazidime–avibactam       | 0.5                      | 128               | 0.12 – >128     | 81.8                       |
|                                                   | Ceftazidime                 | 64                       | 128               | 4 – >128        | 9.1                        |
|                                                   | Cefepime                    | >16                      | >16               | ≤0.12 – >16     | 18.2                       |
|                                                   | Aztreonam                   | 32                       | >128              | 4 – >128        | 9.1                        |
|                                                   | Piperacillin–tazobactam     | >128                     | >128              | 4 – >128        | 9.1                        |
|                                                   | Doripenem                   | 0.06                     | >4                | 0.03 – >4       | 72.7                       |
|                                                   | Imipenem                    | 1                        | >8                | 0.25 – >8       | 54.6                       |
|                                                   | Meropenem                   | 0.06                     | >8                | 0.03 – >8       | 72.7                       |
|                                                   | Amikacin                    | 8                        | >32               | 1 – >32         | 63.6                       |
|                                                   | Colistin (n=0) <sup>e</sup> | — <sup>b</sup>           | —                 | ND <sup>f</sup> | ND                         |
|                                                   | Tigecycline                 | 1                        | 1                 | 0.5 – 2         | 100                        |
|                                                   | Levofloxacin                | >4                       | >4                | 0.12 – >4       | 18.2                       |
| Multidrug–resistant, MBL–negative (10)            | Ceftazidime–avibactam       | 0.25                     | 1                 | 0.12 – 128      | 90.0                       |
|                                                   | Ceftazidime                 | 32                       | 128               | 4 – 128         | 10.0                       |
|                                                   | Cefepime                    | 16                       | >16               | ≤0.12 – >16     | 20.0                       |
|                                                   | Aztreonam                   | 32                       | 128               | 4 – >128        | 10.0                       |
|                                                   | Piperacillin–tazobactam     | 128                      | >128              | 4 – >128        | 10.0                       |
|                                                   | Doripenem                   | 0.06                     | 4                 | 0.03 – >4       | 80.0                       |
|                                                   | Imipenem                    | 1                        | 4                 | 0.25 – >8       | 60.0                       |
|                                                   | Meropenem                   | 0.06                     | 8                 | 0.03 – >8       | 80.0                       |
|                                                   | Amikacin                    | 4                        | >32               | 1 – >32         | 70.0                       |
|                                                   | Colistin (n=0) <sup>e</sup> | — <sup>b</sup>           | —                 | ND <sup>f</sup> | ND                         |
|                                                   | Tigecycline                 | 1                        | 1                 | 0.5 – 2         | 100                        |
|                                                   | Levofloxacin                | >4                       | >4                | 0.12 – >4       | 20.0                       |
| Proteaceae <sup>i</sup>                           |                             |                          |                   |                 |                            |
| All (158) <sup>j</sup>                            | Ceftazidime–avibactam       | 0.06                     | 0.12              | ≤0.015 – 32     | 99.4                       |

| Phenotype/Organism (no. of isolates) <sup>b</sup> | Antimicrobial agent         | MIC (µg/ml) <sup>c</sup> |                   |                 | % Susceptible <sup>d</sup> |
|---------------------------------------------------|-----------------------------|--------------------------|-------------------|-----------------|----------------------------|
|                                                   |                             | MIC <sub>50</sub>        | MIC <sub>90</sub> | Range           |                            |
|                                                   | Ceftazidime                 | 0.06                     | 0.5               | ≤0.015 – >128   | 93.0                       |
|                                                   | Cefepime                    | ≤0.12                    | 8                 | ≤0.12 – >16     | 88.0                       |
|                                                   | Aztreonam                   | 0.06                     | 2                 | ≤0.015 – 128    | 92.4                       |
|                                                   | Piperacillin–tazobactam     | 0.5                      | 2                 | ≤0.25 – 64      | 98.7                       |
|                                                   | Doripenem                   | 0.25                     | 0.5               | 0.06 – >4       | 99.4                       |
|                                                   | Imipenem                    | 2                        | 4                 | 0.12 – 8        | 22.8                       |
|                                                   | Meropenem                   | 0.06                     | 0.12              | 0.03 – 4        | 99.4                       |
|                                                   | Amikacin                    | 4                        | 8                 | ≤0.25 – >32     | 95.6                       |
|                                                   | Colistin (n=0) <sup>e</sup> | — <sup>b</sup>           | —                 | ND <sup>f</sup> | ND                         |
|                                                   | Tigecycline                 | 2                        | 4                 | 1 – 8           | 55.7                       |
|                                                   | Levofloxacin                | 0.5                      | >4                | ≤0.03 – >4      | 74.7                       |
| Ceftazidime-nonsusceptible (11)                   | Ceftazidime–avibactam       | 0.5                      | 1                 | 0.12 – 32       | 90.9                       |
|                                                   | Ceftazidime                 | 64                       | 128               | 8 – >128        | 0                          |
|                                                   | Cefepime                    | 2                        | >16               | ≤0.12 – >16     | 54.6                       |
|                                                   | Aztreonam                   | 16                       | 32                | 1 – 128         | 27.3                       |
|                                                   | Piperacillin–tazobactam     | 2                        | 8                 | ≤0.25 – 32      | 90.9                       |
|                                                   | Doripenem                   | 0.25                     | 0.5               | 0.06 – >4       | 90.9                       |
|                                                   | Imipenem                    | 2                        | 4                 | 0.5 – 8         | 27.3                       |
|                                                   | Meropenem                   | 0.12                     | 0.25              | 0.03 – 4        | 90.9                       |
|                                                   | Amikacin                    | 8                        | >32               | 1 – >32         | 81.8                       |
|                                                   | Colistin (n=0) <sup>e</sup> | — <sup>b</sup>           | —                 | ND <sup>f</sup> | ND                         |
|                                                   | Tigecycline                 | 4                        | 4                 | 2 – 8           | 27.3                       |
|                                                   | Levofloxacin                | >4                       | >4                | 0.12 – >4       | 9.1                        |
| Meropenem-nonsusceptible (1)                      | Ceftazidime–avibactam       | — <sup>b</sup>           | —                 | 32              | 0                          |
|                                                   | Ceftazidime                 | —                        | —                 | 32              | 0                          |
|                                                   | Cefepime                    | —                        | —                 | 8               | 0                          |
|                                                   | Aztreonam                   | —                        | —                 | 32              | 0                          |
|                                                   | Piperacillin–tazobactam     | —                        | —                 | 32              | 0                          |
|                                                   | Doripenem                   | —                        | —                 | >4              | 0                          |
|                                                   | Imipenem                    | —                        | —                 | 8               | 0                          |
|                                                   | Meropenem                   | —                        | —                 | 4               | 0                          |
|                                                   | Amikacin                    | —                        | —                 | >32             | 0                          |
|                                                   | Colistin (n=0) <sup>e</sup> | —                        | —                 | ND <sup>f</sup> | ND                         |
|                                                   | Tigecycline                 | —                        | —                 | 2               | 100                        |
|                                                   | Levofloxacin                | —                        | —                 | 4               | 0                          |
| Multidrug-resistant (6)                           | Ceftazidime–avibactam       | — <sup>b</sup>           | —                 | 0.06 – 32       | 83.3                       |
|                                                   | Ceftazidime                 | —                        | —                 | 0.5 – >128      | 16.7                       |
|                                                   | Cefepime                    | —                        | —                 | 8 – >16         | 0                          |
|                                                   | Aztreonam                   | —                        | —                 | 16 – 128        | 0                          |
|                                                   | Piperacillin–tazobactam     | —                        | —                 | 0.5 – 32        | 83.3                       |
|                                                   | Doripenem                   | —                        | —                 | 0.06 – >4       | 83.3                       |
|                                                   | Imipenem                    | —                        | —                 | 0.5 – 8         | 16.7                       |
|                                                   | Meropenem                   | —                        | —                 | 0.06 – 4        | 83.3                       |
|                                                   | Amikacin                    | —                        | —                 | 4 – >32         | 66.7                       |
|                                                   | Colistin (n=0) <sup>e</sup> | —                        | —                 | ND <sup>f</sup> | ND                         |
|                                                   | Tigecycline                 | —                        | —                 | 2 – 4           | 33.3                       |
|                                                   | Levofloxacin                | —                        | —                 | 0.12 – >4       | 16.7                       |
| Other <i>Enterobacteriaceae</i> <sup>i</sup>      |                             |                          |                   |                 |                            |
| All (28) <sup>k</sup>                             | Ceftazidime–avibactam       | 0.25                     | 0.5               | 0.06 – 1        | 100                        |
|                                                   | Ceftazidime                 | 0.25                     | 8                 | 0.06 – 16       | 89.3                       |
|                                                   | Cefepime                    | ≤0.12                    | >16               | ≤0.12 – >16     | 85.7                       |
|                                                   | Aztreonam                   | 0.25                     | 32                | ≤0.015 – >128   | 85.7                       |
|                                                   | Piperacillin–tazobactam     | 2                        | 64                | 1 – >128        | 85.7                       |
|                                                   | Doripenem                   | 0.12                     | 0.5               | 0.06 – >4       | 96.4                       |
|                                                   | Imipenem                    | 1                        | 2                 | 0.25 – >8       | 78.6                       |
|                                                   | Meropenem                   | 0.06                     | 0.25              | 0.03 – >8       | 96.4                       |
|                                                   | Amikacin                    | 2                        | 4                 | 0.5 – 4         | 100                        |
|                                                   | Colistin (n=0) <sup>e</sup> | — <sup>b</sup>           | —                 | ND <sup>f</sup> | ND                         |
|                                                   | Tigecycline                 | 1                        | 2                 | 0.5 – 2         | 100                        |
|                                                   | Levofloxacin                | 0.12                     | 4                 | ≤0.03 – >4      | 89.3                       |

| Phenotype/Organism (no. of isolates) <sup>b</sup> | Antimicrobial agent         | MIC (µg/ml) <sup>c</sup> |                   |                 | % Susceptible <sup>d</sup> |
|---------------------------------------------------|-----------------------------|--------------------------|-------------------|-----------------|----------------------------|
|                                                   |                             | MIC <sub>50</sub>        | MIC <sub>90</sub> | Range           |                            |
| Ceftazidime-nonsusceptible (3)                    | Ceftazidime-avibactam       | — <sup>b</sup>           | —                 | 0.25 – 1        | 100                        |
|                                                   | Ceftazidime                 | —                        | —                 | 8 – 16          | 0                          |
|                                                   | Cefepime                    | —                        | —                 | 2 – >16         | 33.3                       |
|                                                   | Aztreonam                   | —                        | —                 | 2 – >128        | 33.3                       |
|                                                   | Piperacillin-tazobactam     | —                        | —                 | 2 – >128        | 33.3                       |
|                                                   | Doripenem                   | —                        | —                 | 0.12 – >4       | 66.7                       |
|                                                   | Imipenem                    | —                        | —                 | 2 – >8          | 0                          |
|                                                   | Meropenem                   | —                        | —                 | 0.06 – >8       | 66.7                       |
|                                                   | Amikacin                    | —                        | —                 | 0.5 – 2         | 100                        |
|                                                   | Colistin (n=0) <sup>e</sup> | —                        | —                 | ND <sup>f</sup> | ND                         |
|                                                   | Tigecycline                 | —                        | —                 | 0.5 – 1         | 100                        |
| Levofloxacin                                      | —                           | —                        | 0.25 – 2          | 100             |                            |
| Meropenem-nonsusceptible (1)                      | Ceftazidime-avibactam       | — <sup>b</sup>           | —                 | 1               | 100                        |
|                                                   | Ceftazidime                 | —                        | —                 | 16              | 0                          |
|                                                   | Cefepime                    | —                        | —                 | >16             | 0                          |
|                                                   | Aztreonam                   | —                        | —                 | >128            | 0                          |
|                                                   | Piperacillin-tazobactam     | —                        | —                 | >128            | 0                          |
|                                                   | Doripenem                   | —                        | —                 | >4              | 0                          |
|                                                   | Imipenem                    | —                        | —                 | >8              | 0                          |
|                                                   | Meropenem                   | —                        | —                 | >8              | 0                          |
|                                                   | Amikacin                    | —                        | —                 | 0.5             | 100                        |
|                                                   | Colistin (n=0) <sup>e</sup> | —                        | —                 | ND <sup>f</sup> | ND                         |
|                                                   | Tigecycline                 | —                        | —                 | 1               | 100                        |
| Levofloxacin                                      | —                           | —                        | 2                 | 100             |                            |
| Multidrug-resistant (2)                           | Ceftazidime-avibactam       | — <sup>b</sup>           | —                 | 0.5 – 1         | 100                        |
|                                                   | Ceftazidime                 | —                        | —                 | 8 – 16          | 0                          |
|                                                   | Cefepime                    | —                        | —                 | >16 – >16       | 0                          |
|                                                   | Aztreonam                   | —                        | —                 | 64 – >128       | 0                          |
|                                                   | Piperacillin-tazobactam     | —                        | —                 | >128 – >128     | 0                          |
|                                                   | Doripenem                   | —                        | —                 | 0.5 – >4        | 50.0                       |
|                                                   | Imipenem                    | —                        | —                 | 2 – >8          | 0                          |
|                                                   | Meropenem                   | —                        | —                 | 0.12 – >8       | 50.0                       |
|                                                   | Amikacin                    | —                        | —                 | 0.5 – 2         | 100                        |
|                                                   | Colistin (n=0) <sup>e</sup> | —                        | —                 | ND <sup>f</sup> | ND                         |
|                                                   | Tigecycline                 | —                        | —                 | 1 – 1           | 100                        |
| Levofloxacin                                      | —                           | —                        | 1 – 2             | 100             |                            |
| <i>Pseudomonas aeruginosa</i>                     |                             |                          |                   |                 |                            |
| All (195)                                         | Ceftazidime-avibactam       | 2                        | 8                 | 0.5 – 128       | 96.9                       |
|                                                   | Ceftazidime                 | 4                        | 64                | 0.5 – >128      | 81.0                       |
|                                                   | Cefepime                    | 4                        | >16               | 0.5 – >16       | 80.0                       |
|                                                   | Aztreonam                   | 8                        | 64                | 0.5 – >128      | 58.5                       |
|                                                   | Piperacillin-tazobactam     | 8                        | >128              | 0.5 – >128      | 70.8                       |
|                                                   | Doripenem                   | 0.5                      | >4                | 0.03 – >4       | 73.9                       |
|                                                   | Imipenem                    | 2                        | >8                | 0.25 – >8       | 67.2                       |
|                                                   | Meropenem                   | 1                        | >8                | ≤0.06 – >8      | 73.3                       |
|                                                   | Amikacin                    | 4                        | 8                 | 0.5 – >32       | 96.9                       |
|                                                   | Colistin (n=0) <sup>e</sup> | — <sup>b</sup>           | —                 | ND <sup>f</sup> | ND                         |
|                                                   | Levofloxacin                | 0.5                      | >4                | 0.12 – >4       | 79.5                       |
| All, MBL-negative (194)                           | Ceftazidime-avibactam       | 2                        | 8                 | 0.5 – 128       | 97.4                       |
|                                                   | Ceftazidime                 | 4                        | 64                | 0.5 – >128      | 81.4                       |
|                                                   | Cefepime                    | 4                        | >16               | 0.5 – >16       | 79.9                       |
|                                                   | Aztreonam                   | 8                        | 64                | 0.5 – >128      | 58.3                       |
|                                                   | Piperacillin-tazobactam     | 8                        | >128              | 0.5 – >128      | 71.1                       |
|                                                   | Doripenem                   | 0.5                      | >4                | 0.03 – >4       | 74.2                       |
|                                                   | Imipenem                    | 2                        | >8                | 0.25 – >8       | 67.5                       |
|                                                   | Meropenem                   | 0.5                      | >8                | ≤0.06 – >8      | 73.7                       |
|                                                   | Amikacin                    | 4                        | 8                 | 0.5 – >32       | 96.9                       |
|                                                   | Colistin (n=0) <sup>e</sup> | — <sup>b</sup>           | —                 | ND <sup>f</sup> | ND                         |
|                                                   | Levofloxacin                | 0.5                      | >4                | 0.12 – >4       | 79.4                       |

| Phenotype/Organism (no. of isolates) <sup>b</sup> | Antimicrobial agent         | MIC ( $\mu\text{g/ml}$ ) <sup>c</sup> |                   |                 | % Susceptible <sup>d</sup> |
|---------------------------------------------------|-----------------------------|---------------------------------------|-------------------|-----------------|----------------------------|
|                                                   |                             | MIC <sub>50</sub>                     | MIC <sub>90</sub> | Range           |                            |
| Ceftazidime-nonsusceptible (37)                   | Ceftazidime-avibactam       | 8                                     | 64                | 1 – 128         | 83.8                       |
|                                                   | Ceftazidime                 | 64                                    | 128               | 16 – >128       | 0                          |
|                                                   | Cefepime                    | 16                                    | >16               | 1 – >16         | 21.6                       |
|                                                   | Aztreonam                   | 32                                    | 128               | 4 – >128        | 10.8                       |
|                                                   | Piperacillin-tazobactam     | >128                                  | >128              | 4 – >128        | 5.4                        |
|                                                   | Doripenem                   | >4                                    | >4                | 0.06 – >4       | 32.4                       |
|                                                   | Imipenem                    | >8                                    | >8                | 1 – >8          | 32.4                       |
|                                                   | Meropenem                   | 8                                     | >8                | 0.12 – >8       | 35.1                       |
|                                                   | Amikacin                    | 4                                     | >32               | 0.5 – >32       | 89.2                       |
|                                                   | Colistin (n=0) <sup>e</sup> | — <sup>b</sup>                        | —                 | ND <sup>f</sup> | ND                         |
| Levofloxacin                                      | 2                           | >4                                    | 0.12 – >4         | 59.5            |                            |
| Ceftazidime-nonsusceptible, MBL-negative (36)     | Ceftazidime-avibactam       | 8                                     | 64                | 1 – 128         | 86.1                       |
|                                                   | Ceftazidime                 | 64                                    | 128               | 16 – >128       | 0                          |
|                                                   | Cefepime                    | 16                                    | >16               | 1 – >16         | 19.4                       |
|                                                   | Aztreonam                   | 32                                    | 128               | 4 – >128        | 8.3                        |
|                                                   | Piperacillin-tazobactam     | >128                                  | >128              | 4 – >128        | 5.6                        |
|                                                   | Doripenem                   | >4                                    | >4                | 0.06 – >4       | 33.3                       |
|                                                   | Imipenem                    | >8                                    | >8                | 1 – >8          | 33.3                       |
|                                                   | Meropenem                   | 8                                     | >8                | 0.12 – >8       | 36.1                       |
|                                                   | Amikacin                    | 4                                     | >32               | 0.5 – >32       | 88.9                       |
|                                                   | Colistin (n=0) <sup>e</sup> | — <sup>b</sup>                        | —                 | ND <sup>f</sup> | ND                         |
| Levofloxacin                                      | 2                           | >4                                    | 0.12 – >4         | 58.3            |                            |
| Meropenem-nonsusceptible (52)                     | Ceftazidime-avibactam       | 4                                     | 8                 | 1 – 128         | 92.3                       |
|                                                   | Ceftazidime                 | 8                                     | 128               | 1 – >128        | 53.9                       |
|                                                   | Cefepime                    | 16                                    | >16               | 1 – >16         | 46.2                       |
|                                                   | Aztreonam                   | 16                                    | 128               | 1 – >128        | 30.8                       |
|                                                   | Piperacillin-tazobactam     | 128                                   | >128              | 4 – >128        | 36.5                       |
|                                                   | Doripenem                   | >4                                    | >4                | 2 – >4          | 3.9                        |
|                                                   | Imipenem                    | >8                                    | >8                | 0.5 – >8        | 1.9                        |
|                                                   | Meropenem                   | 8                                     | >8                | 4 – >8          | 0                          |
|                                                   | Amikacin                    | 4                                     | >32               | 1 – >32         | 88.5                       |
|                                                   | Colistin (n=0) <sup>e</sup> | — <sup>b</sup>                        | —                 | ND <sup>f</sup> | ND                         |
| Levofloxacin                                      | 2                           | >4                                    | 0.12 – >4         | 53.9            |                            |
| Meropenem-nonsusceptible, MBL-negative (51)       | Ceftazidime-avibactam       | 4                                     | 8                 | 1 – 128         | 94.1                       |
|                                                   | Ceftazidime                 | 8                                     | 128               | 1 – >128        | 54.9                       |
|                                                   | Cefepime                    | 16                                    | >16               | 1 – >16         | 45.1                       |
|                                                   | Aztreonam                   | 16                                    | 128               | 1 – >128        | 29.4                       |
|                                                   | Piperacillin-tazobactam     | 128                                   | >128              | 4 – >128        | 37.3                       |
|                                                   | Doripenem                   | >4                                    | >4                | 2 – >4          | 3.9                        |
|                                                   | Imipenem                    | >8                                    | >8                | 0.5 – >8        | 2.0                        |
|                                                   | Meropenem                   | 8                                     | >8                | 4 – >8          | 0                          |
|                                                   | Amikacin                    | 4                                     | >32               | 1 – >32         | 88.2                       |
|                                                   | Colistin (n=0) <sup>e</sup> | — <sup>b</sup>                        | —                 | ND <sup>f</sup> | ND                         |
| Levofloxacin                                      | 2                           | >4                                    | 0.12 – >4         | 52.9            |                            |
| Multidrug-resistant (30) <sup>j</sup>             | Ceftazidime-avibactam       | 8                                     | 64                | 1 – 128         | 83.3                       |
|                                                   | Ceftazidime                 | 64                                    | 128               | 1 – >128        | 16.7                       |
|                                                   | Cefepime                    | >16                                   | >16               | 8 – >16         | 3.3                        |
|                                                   | Aztreonam                   | 64                                    | 128               | 4 – >128        | 6.7                        |
|                                                   | Piperacillin-tazobactam     | >128                                  | >128              | 4 – >128        | 3.3                        |
|                                                   | Doripenem                   | >4                                    | >4                | 0.06 – >4       | 16.7                       |
|                                                   | Imipenem                    | >8                                    | >8                | 0.5 – >8        | 20.0                       |
|                                                   | Meropenem                   | >8                                    | >8                | 0.12 – >8       | 16.7                       |
|                                                   | Amikacin                    | 4                                     | >32               | 2 – >32         | 80.0                       |
|                                                   | Colistin (n=0) <sup>e</sup> | — <sup>b</sup>                        | —                 | ND <sup>f</sup> | ND                         |
| Levofloxacin                                      | >4                          | >4                                    | 0.12 – >4         | 33.3            |                            |

<sup>a</sup> No isolates were obtained from patients in mainland China in 2014–2015 due to export restrictions.

<sup>b</sup> —, MBL-negative, no gene encoding a metallo- $\beta$ -lactamase was detected by PCR.

<sup>c</sup> MIC<sub>50</sub> and MIC<sub>90</sub> were not calculated for n < 10 isolates.

<sup>d</sup> % Susceptibility was determined according to CLSI 2016 breakpoints with the exception of ceftazidime–avibactam and tigecycline, where US FDA breakpoints were applied. Because CLSI colistin breakpoints are not available for the *Enterobacteriaceae*, susceptibility for this organism group was determined using the EUCAST 2016 breakpoints for colistin.

<sup>e</sup> Values are for colistin tested without 0.002% polysorbate–80; isolates collected in 2014–2015 only.

<sup>f</sup> ND, not determined; MIC range and % susceptible were not calculated for n=0 isolates.

<sup>g</sup> *Enterobacter* spp. includes *Enterobacter aerogenes* (n=63), *Enterobacter asburiae* (n=15), *Enterobacter cloacae* (n=69), and *Enterobacter kobei* (n=4).

<sup>h</sup> *Citrobacter* spp. includes *Citrobacter braakii* (n=5), *Citrobacter freundii* (n=62), and *Citrobacter koseri* (n=18).

<sup>i</sup> All isolates were MBL–negative.

<sup>j</sup> Proteae includes *Morganella morganii* (n=33), *Proteus mirabilis* (n=78), *Proteus penneri* (n=3), *Proteus vulgaris* (n=34), *Providencia rettgeri* (n=9), and *Providencia stuartii* (n=1).

<sup>k</sup> Other *Enterobacteriaceae* includes *Raoultella ornithinolytica* (n=3), *Serratia liquefaciens* (n=1), and *Serratia marcescens* (n=24).

**Supplemental Table S3B.** China – *In vitro* activities of ceftazidime–avibactam and comparator antimicrobial agents tested against 582 isolates of  $\beta$ –lactamase–positive *Enterobacteriaceae* (n=509) and *P. aeruginosa* (n=73) collected as part of the INFORM global surveillance program in 2012–2013.

| Organism/Genotype (no. of isolates) <sup>a</sup>     | Antimicrobial agent                             | MIC ( $\mu\text{g/ml}$ ) <sup>b</sup> |                   |                 | % Susceptible <sup>c</sup> |
|------------------------------------------------------|-------------------------------------------------|---------------------------------------|-------------------|-----------------|----------------------------|
|                                                      |                                                 | MIC <sub>50</sub>                     | MIC <sub>90</sub> | Range           |                            |
| <i>Enterobacteriaceae</i> (509)<br>OSBL–positive (8) | Ceftazidime–avibactam                           | — <sup>b</sup>                        | —                 | 0.03 – >128     | 87.5                       |
|                                                      | Ceftazidime                                     | —                                     | —                 | 0.5 – >128      | 62.5                       |
|                                                      | Cefepime                                        | —                                     | —                 | 0.25 – >16      | 50.0                       |
|                                                      | Aztreonam                                       | —                                     | —                 | 1 – 64          | 37.5                       |
|                                                      | Piperacillin–tazobactam                         | —                                     | —                 | 2 – >128        | 75.0                       |
|                                                      | Doripenem                                       | —                                     | —                 | 0.015 – >4      | 87.5                       |
|                                                      | Imipenem                                        | —                                     | —                 | 0.12 – 4        | 87.5                       |
|                                                      | Meropenem                                       | —                                     | —                 | 0.015 – 8       | 87.5                       |
|                                                      | Amikacin                                        | —                                     | —                 | ≤0.25 – 4       | 100                        |
|                                                      | Colistin (n=0) <sup>d</sup>                     | —                                     | —                 | ND <sup>e</sup> | ND                         |
|                                                      | Tigecycline                                     | —                                     | —                 | 0.06 – 2        | 100                        |
|                                                      | Levofloxacin                                    | —                                     | —                 | 0.06 – >4       | 50.0                       |
|                                                      | ESBL–positive (335) <sup>f</sup>                | Ceftazidime–avibactam                 | 0.12              | 0.5             | ≤0.015 – 16                |
| Ceftazidime                                          |                                                 | 8                                     | 64                | 0.12 – >128     | 41.5                       |
| Cefepime                                             |                                                 | >16                                   | >16               | 0.25 – >16      | 8.4                        |
| Aztreonam                                            |                                                 | 32                                    | 128               | 1 – >128        | 20.0                       |
| Piperacillin–tazobactam                              |                                                 | 4                                     | 32                | ≤0.25 – >128    | 87.2                       |
| Doripenem                                            |                                                 | 0.03                                  | 0.12              | 0.015 – >4      | 98.5                       |
| Imipenem                                             |                                                 | 0.25                                  | 0.5               | 0.06 – >8       | 95.2                       |
| Meropenem                                            |                                                 | 0.03                                  | 0.06              | 0.008 – >8      | 98.2                       |
| Amikacin                                             |                                                 | 4                                     | 16                | 0.5 – >32       | 91.3                       |
| Colistin (n=0) <sup>d</sup>                          |                                                 | — <sup>b</sup>                        | —                 | ND <sup>e</sup> | ND                         |
| Tigecycline                                          |                                                 | 0.5                                   | 2                 | 0.06 – 4        | 96.7                       |
| Levofloxacin                                         |                                                 | >4                                    | >4                | ≤0.03 – >4      | 31.9                       |
| AmpC–positive (83) <sup>g</sup>                      |                                                 | Ceftazidime–avibactam                 | 0.5               | 2               | ≤0.015 – 16                |
|                                                      | Ceftazidime                                     | 64                                    | >128              | 0.03 – >128     | 31.3                       |
|                                                      | Cefepime                                        | 0.25                                  | >16               | ≤0.12 – >16     | 77.1                       |
|                                                      | Aztreonam                                       | 32                                    | 128               | ≤0.015 – >128   | 38.6                       |
|                                                      | Piperacillin–tazobactam                         | 32                                    | >128              | ≤0.25 – >128    | 47.0                       |
|                                                      | Doripenem                                       | 0.12                                  | 0.5               | 0.015 – >4      | 96.4                       |
|                                                      | Imipenem                                        | 2                                     | 4                 | 0.12 – >8       | 49.4                       |
|                                                      | Meropenem                                       | 0.06                                  | 0.25              | 0.015 – >8      | 96.4                       |
|                                                      | Amikacin                                        | 2                                     | >32               | 0.5 – >32       | 89.2                       |
|                                                      | Colistin (n=0) <sup>d</sup>                     | — <sup>b</sup>                        | —                 | ND <sup>e</sup> | ND                         |
|                                                      | Tigecycline                                     | 1                                     | 2                 | 0.06 – 4        | 94.0                       |
|                                                      | Levofloxacin                                    | 0.5                                   | >4                | ≤0.03 – >4      | 67.5                       |
|                                                      | ESBL–positive + AmpC–positive (48) <sup>h</sup> | Ceftazidime–avibactam                 | 0.5               | 4               | ≤0.015 – 128               |
| Ceftazidime                                          |                                                 | 64                                    | >128              | 0.12 – >128     | 10.4                       |
| Cefepime                                             |                                                 | 16                                    | >16               | ≤0.12 – >16     | 27.1                       |
| Aztreonam                                            |                                                 | 64                                    | >128              | 0.03 – >128     | 10.4                       |
| Piperacillin–tazobactam                              |                                                 | 16                                    | >128              | 0.5 – >128      | 52.1                       |
| Doripenem                                            |                                                 | 0.12                                  | 0.5               | 0.03 – >4       | 95.8                       |
| Imipenem                                             |                                                 | 1                                     | 2                 | 0.06 – 4        | 62.5                       |
| Meropenem                                            |                                                 | 0.06                                  | 0.5               | 0.015 – 8       | 93.8                       |
| Amikacin                                             |                                                 | 4                                     | >32               | ≤0.25 – >32     | 68.8                       |
| Colistin (n=0) <sup>d</sup>                          |                                                 | — <sup>b</sup>                        | —                 | ND <sup>e</sup> | ND                         |
| Tigecycline                                          |                                                 | 0.5                                   | 2                 | 0.06 – 8        | 91.7                       |
| Levofloxacin                                         |                                                 | >4                                    | >4                | 0.06 – >4       | 35.4                       |
| KPC–positive (25) <sup>i</sup>                       |                                                 | Ceftazidime–avibactam                 | 1                 | 4               | 0.25 – 16                  |
|                                                      | Ceftazidime                                     | 128                                   | >128              | 2 – >128        | 4.0                        |



| Organism/Genotype (no. of isolates) <sup>a</sup> | Antimicrobial agent         | MIC (µg/ml) <sup>b</sup> |                   |                 | % Susceptible <sup>c</sup> |
|--------------------------------------------------|-----------------------------|--------------------------|-------------------|-----------------|----------------------------|
|                                                  |                             | MIC <sub>50</sub>        | MIC <sub>90</sub> | Range           |                            |
|                                                  | Cefepime                    | >16                      | >16               | 4 – >16         | 0                          |
|                                                  | Aztreonam                   | >128                     | >128              | 64 – >128       | 0                          |
|                                                  | Piperacillin–tazobactam     | >128                     | >128              | 64 – >128       | 0                          |
|                                                  | Doripenem                   | >4                       | >4                | 0.5 – >4        | 8.0                        |
|                                                  | Imipenem                    | >8                       | >8                | 2 – >8          | 0                          |
|                                                  | Meropenem                   | >8                       | >8                | 2 – >8          | 0                          |
|                                                  | Amikacin                    | 4                        | >32               | ≤0.25 – >32     | 72.0                       |
|                                                  | Colistin (n=0) <sup>d</sup> | — <sup>b</sup>           | —                 | ND <sup>e</sup> | ND                         |
|                                                  | Tigecycline                 | 1                        | 2                 | 0.06 – 4        | 92.0                       |
|                                                  | Levofloxacin                | >4                       | >4                | 0.5 – >4        | 24.0                       |
| MBL–positive (10) <sup>j</sup>                   | Ceftazidime–avibactam       | >128                     | >128              | 2 – >128        | 10.0                       |
|                                                  | Ceftazidime                 | >128                     | >128              | 128 – >128      | 0                          |
|                                                  | Cefepime                    | >16                      | >16               | 8 – >16         | 0                          |
|                                                  | Aztreonam                   | 64                       | >128              | 1 – >128        | 10.0                       |
|                                                  | Piperacillin–tazobactam     | >128                     | >128              | 16 – >128       | 10.0                       |
|                                                  | Doripenem                   | >4                       | >4                | 1 – >4          | 10.0                       |
|                                                  | Imipenem                    | >8                       | >8                | 1 – >8          | 10.0                       |
|                                                  | Meropenem                   | 8                        | >8                | 1 – >8          | 10.0                       |
|                                                  | Amikacin                    | 8                        | >32               | 1 – >32         | 70.0                       |
|                                                  | Colistin (n=0) <sup>d</sup> | — <sup>b</sup>           | —                 | ND <sup>e</sup> | ND                         |
|                                                  | Tigecycline                 | 1                        | 1                 | 0.5 – 2         | 100                        |
|                                                  | Levofloxacin                | 4                        | >4                | 1 – >4          | 40.0                       |
| <i>P. aeruginosa</i> (73)                        | Ceftazidime–avibactam       | — <sup>b</sup>           | —                 | 8 – 8           | 100                        |
| OSBL–positive (2) <sup>k</sup>                   | Ceftazidime                 | —                        | —                 | 16 – 32         | 0                          |
|                                                  | Cefepime                    | —                        | —                 | 16 – >16        | 0                          |
|                                                  | Aztreonam                   | —                        | —                 | 16 – 32         | 0                          |
|                                                  | Piperacillin–tazobactam     | —                        | —                 | >128 – >128     | 0                          |
|                                                  | Doripenem                   | —                        | —                 | >4 – >4         | 0                          |
|                                                  | Imipenem                    | —                        | —                 | >8 – >8         | 0                          |
|                                                  | Meropenem                   | —                        | —                 | >8 – >8         | 0                          |
|                                                  | Amikacin                    | —                        | —                 | >32 – >32       | 0                          |
|                                                  | Colistin (n=1) <sup>d</sup> | —                        | —                 | ND <sup>e</sup> | ND                         |
|                                                  | Levofloxacin                | —                        | —                 | 4 – >4          | 0                          |
| ESBL–positive (2) <sup>k,l</sup>                 | Ceftazidime–avibactam       | — <sup>b</sup>           | —                 | 8 – 8           | 100                        |
|                                                  | Ceftazidime                 | —                        | —                 | 128 – >128      | 0                          |
|                                                  | Cefepime                    | —                        | —                 | >16 – >16       | 0                          |
|                                                  | Aztreonam                   | —                        | —                 | 128 – >128      | 0                          |
|                                                  | Piperacillin–tazobactam     | —                        | —                 | 128 – >128      | 0                          |
|                                                  | Doripenem                   | —                        | —                 | 4 – 4           | 0                          |
|                                                  | Imipenem                    | —                        | —                 | >8 – >8         | 0                          |
|                                                  | Meropenem                   | —                        | —                 | 4 – 8           | 0                          |
|                                                  | Amikacin                    | —                        | —                 | >32 – >32       | 0                          |
|                                                  | Colistin (n=0) <sup>d</sup> | —                        | —                 | ND <sup>e</sup> | ND                         |
|                                                  | Levofloxacin                | —                        | —                 | >4 – >4         | 0                          |
| KPC–positive (1) <sup>k,m</sup>                  | Ceftazidime–avibactam       | — <sup>b</sup>           | —                 | 4               | 100                        |
|                                                  | Ceftazidime                 | —                        | —                 | 64              | 0                          |
|                                                  | Cefepime                    | —                        | —                 | >16             | 0                          |
|                                                  | Aztreonam                   | —                        | —                 | >128            | 0                          |
|                                                  | Piperacillin–tazobactam     | —                        | —                 | >128            | 0                          |
|                                                  | Doripenem                   | —                        | —                 | >4              | 0                          |
|                                                  | Imipenem                    | —                        | —                 | >8              | 0                          |
|                                                  | Meropenem                   | —                        | —                 | >8              | 0                          |
|                                                  | Amikacin                    | —                        | —                 | 4               | 100                        |
|                                                  | Colistin (n=0) <sup>d</sup> | —                        | —                 | ND <sup>e</sup> | ND                         |
|                                                  | Levofloxacin                | —                        | —                 | 0.12            | 100                        |
| MBL–positive (1) <sup>k,n</sup>                  | Ceftazidime–avibactam       | — <sup>b</sup>           | —                 | 16              | 0                          |
|                                                  | Ceftazidime                 | —                        | —                 | 32              | 0                          |
|                                                  | Cefepime                    | —                        | —                 | 8               | 100                        |

| Organism/Genotype (no. of isolates) <sup>a</sup>   | Antimicrobial agent         | MIC (µg/ml) <sup>b</sup> |                   |                 | % Susceptible <sup>c</sup> |
|----------------------------------------------------|-----------------------------|--------------------------|-------------------|-----------------|----------------------------|
|                                                    |                             | MIC <sub>50</sub>        | MIC <sub>90</sub> | Range           |                            |
|                                                    | Aztreonam                   | —                        | —                 | 4               | 100                        |
|                                                    | Piperacillin–tazobactam     | —                        | —                 | 32              | 0                          |
|                                                    | Doripenem                   | —                        | —                 | 4               | 0                          |
|                                                    | Imipenem                    | —                        | —                 | >8              | 0                          |
|                                                    | Meropenem                   | —                        | —                 | 8               | 0                          |
|                                                    | Amikacin                    | —                        | —                 | 8               | 100                        |
|                                                    | Colistin (n=0) <sup>d</sup> | —                        | —                 | ND <sup>e</sup> | ND                         |
|                                                    | Levofloxacin                | —                        | —                 | 0.5             | 100                        |
| <hr/>                                              |                             |                          |                   |                 |                            |
| No acquired β-lactamase detected (67) <sup>k</sup> | Ceftazidime–avibactam       | 4                        | 8                 | 0.5 – 128       | 95.5                       |
|                                                    | Ceftazidime                 | 4                        | 64                | 0.5 – 128       | 67.2                       |
|                                                    | Cefepime                    | 8                        | >16               | 0.5 – >16       | 61.2                       |
|                                                    | Aztreonam                   | 16                       | 128               | 1 – >128        | 40.3                       |
|                                                    | Piperacillin–tazobactam     | 32                       | >128              | 2 – >128        | 49.3                       |
|                                                    | Doripenem                   | 4                        | >4                | 0.03 – >4       | 26.9                       |
|                                                    | Imipenem                    | >8                       | >8                | 0.5 – >8        | 6.0                        |
|                                                    | Meropenem                   | 8                        | >8                | ≤0.06 – >8      | 25.4                       |
|                                                    | Amikacin                    | 4                        | 16                | 0.5 – >32       | 97.0                       |
|                                                    | Colistin (n=0) <sup>d</sup> | — <sup>b</sup>           | —                 | ND <sup>e</sup> | ND                         |
|                                                    | Levofloxacin                | 2                        | >4                | 0.12 – >4       | 65.7                       |

<sup>a</sup> OSBL, original-spectrum β-lactamase (e.g. TEM-1, SHV-1, SHV-11); ESBL, extended-spectrum β-lactamase; MBL, metallo-β-lactamase.

<sup>b</sup> —, MIC<sub>50</sub> and MIC<sub>90</sub> were not calculated for n < 10 isolates.

<sup>c</sup> % Susceptibility was determined according to CLSI 2016 breakpoints with the exception of ceftazidime–avibactam and tigecycline, where US FDA breakpoints were applied. Because CLSI colistin breakpoints are not available for the *Enterobacteriaceae*, susceptibility for this organism group was determined using the EUCAST 2016 breakpoints for colistin.

<sup>d</sup> Values are for colistin tested without 0.002% polysorbate-80; isolates collected in 2014–2015 only.

<sup>e</sup> ND, not determined. MIC range and % susceptible were not calculated for n=0 isolates.

<sup>f</sup> Includes isolates carrying CTX-M-3; CTX-M-9; CTX-M-13; CTX-M-14; CTX-M-15; CTX-M-22; CTX-M-24; CTX-M-27; CTX-M-55; CTX-M-64; CTX-M-65; CTX-M-79; CTX-M-90; CTX-M-125; CTX-M-130; CTX-M-type; SHV-2; SHV-2A; SHV-12; PER-1; CTX-M-3 and CTX-M-14; CTX-M-15 and CTX-M-14; CTX-M-15 and CTX-M-104; CTX-M-55 and CTX-M-14; CTX-M-55 and CTX-M-27; CTX-M-55 and CTX-M-79; CTX-M-55 and CTX-M-65; CTX-M-55 and CTX-M-130; CTX-M-65 and CTX-M-79; SHV-12 and CTX-M-14; SHV-5 and CTX-M-14; and the chromosomal ESBL common to *K. oxytoca* with or without SHV-type or TEM-type OSBLs or enzymes of undefined spectrum.

<sup>g</sup> Includes isolates carrying CMY-2; CMY-34; CMY-42; CMY-62; DHA-1; and the chromosomal AmpC common to *Citrobacter* spp., *Enterobacter* spp., *M. morgani*, *Providencia* spp., and *Serratia* spp. with or without SHV-OSBLs and/or TEM-OSBLs.

<sup>h</sup> Includes isolates carrying CMY-2 and a CTX-M-type ESBL (CTX-M-14, CTX-M-15, or CTX-M-14 and CTX-M-55); CMY-32 and CTX-M-14; CMY-34 and CTX-M-13; CMY-42 and CTX-M-14; CMY-88 and CTX-M-55; DHA-1 and one ESBL (CTX-M-3, CTX-M-14, CTX-M-22, CTX-M-27, SHV-2, SHV-2A, SHV-12, SHV-31, or the chromosomal ESBL of *K. oxytoca*); DHA-1 and multiple ESBLs (SHV-5 and CTX-M-3; SHV-5 and CTX-M-15; SHV-12 and CTX-M-3; SHV-12 and CTX-M-14; SHV-12 and CTX-M-15; SHV-12 and CTX-M-22); the chromosomal AmpC common to *Citrobacter* spp. and CTX-M-3 or CTX-M-15; and the

chromosomal AmpC common to *Enterobacter* spp. and ESBLs (CTX-M-2, CTX-M-3, CTX-M-9, CTX-M-14, SHV-12, SHV-12 and CTX-M-3, SHV-12 and CTX-M-15).

<sup>i</sup> Includes isolates carrying KPC-2; KPC-2 and CTX-M-3; KPC-2 and CTX-M-14 and SHV-12; KPC-2 and CTX-M-27 and DHA-1; KPC-2 and CTX-M-65; KPC-2 and CTX-M-65 and SHV-12; KPC-2 and CTX-M-90; KPC-2 and SHV-12; KPC-2 and CMY-2; KPC-12 and SHV-2A; with and without SHV-OSBLs and/or TEM-OSBLs and the chromosomal  $\beta$ -lactamases common to *Citrobacter* spp., *Enterobacter* spp., *S. marcescens* and *K. oxytoca*.

<sup>j</sup> Includes isolates carrying IMP-1; IMP-4; IMP-4 and CTX-M-15; IMP-4 and KPC-2 and SHV-12; IMP-8 and CTX-M-22; NDM-1 and CTX-M-3; NDM-1 and CTX-M-3 and SHV-12 and CMY-34; and the chromosomal  $\beta$ -lactamases common to *C. freundii*, *E. cloacae*, and *K. oxytoca* with or without SHV-OSBLs and/or TEM-OSBLs.

<sup>k</sup> Assumed to carry the chromosomal AmpC common to *P. aeruginosa*.

<sup>l</sup> Includes isolates carrying GES-1; and PER-1 and a TEM-OSBL.

<sup>m</sup> Isolate carrying KPC-2.

<sup>n</sup> Isolate carrying VIM-2.

**Supplemental Table S4A.** Hong Kong – *In vitro* activities of ceftazidime–avibactam and comparator antimicrobial agents tested against 146 isolates of *Enterobacteriaceae* and 36 isolates of *P. aeruginosa* collected as part of the INFORM global surveillance program in 2013–2014.

| Phenotype/Organism (no. of isolates) <sup>a</sup> | Antimicrobial agent          | MIC (µg/ml) <sup>b</sup> |                   |                 | % Susceptible <sup>c</sup> |
|---------------------------------------------------|------------------------------|--------------------------|-------------------|-----------------|----------------------------|
|                                                   |                              | MIC <sub>50</sub>        | MIC <sub>90</sub> | Range           |                            |
| <i>Enterobacteriaceae</i> <sup>d</sup>            |                              |                          |                   |                 |                            |
| All (146)                                         | Ceftazidime–avibactam        | 0.12                     | 0.25              | 0.03 – 0.5      | 100                        |
|                                                   | Ceftazidime                  | 0.25                     | 64                | 0.03 – 128      | 80.1                       |
|                                                   | Cefepime                     | ≤0.12                    | >16               | ≤0.12 – >16     | 83.6                       |
|                                                   | Aztreonam                    | 0.12                     | 32                | ≤0.015 – 128    | 80.1                       |
|                                                   | Piperacillin–tazobactam      | 2                        | 8                 | ≤0.25 – >128    | 95.9                       |
|                                                   | Doripenem                    | 0.06                     | 0.25              | 0.03 – 2        | 98.6                       |
|                                                   | Imipenem                     | 0.25                     | 2                 | 0.12 – 4        | 82.2                       |
|                                                   | Meropenem                    | 0.03                     | 0.12              | 0.015 – 2       | 99.3                       |
|                                                   | Amikacin                     | 2                        | 4                 | 0.5 – >32       | 95.2                       |
|                                                   | Colistin (n=81) <sup>e</sup> | 1                        | >4                | 0.5 – >4        | 81.5                       |
|                                                   | Tigecycline                  | 0.25                     | 2                 | 0.06 – 4        | 94.5                       |
|                                                   | Levofloxacin                 | 0.25                     | >4                | ≤0.03 – >4      | 80.1                       |
| Ceftazidime-nonsusceptible (29)                   | Ceftazidime–avibactam        | 0.25                     | 0.5               | 0.03 – 0.5      | 100                        |
|                                                   | Ceftazidime                  | 64                       | 128               | 8 – 128         | 0                          |
|                                                   | Cefepime                     | >16                      | >16               | ≤0.12 – >16     | 44.8                       |
|                                                   | Aztreonam                    | 32                       | 128               | 1 – 128         | 13.8                       |
|                                                   | Piperacillin–tazobactam      | 4                        | >128              | ≤0.25 – >128    | 82.8                       |
|                                                   | Doripenem                    | 0.12                     | 0.25              | 0.03 – 2        | 96.6                       |
|                                                   | Imipenem                     | 0.25                     | 2                 | 0.12 – 4        | 79.3                       |
|                                                   | Meropenem                    | 0.06                     | 0.25              | 0.03 – 2        | 96.6                       |
|                                                   | Amikacin                     | 2                        | >32               | 1 – >32         | 86.2                       |
|                                                   | Colistin (n=12) <sup>e</sup> | 1                        | 1                 | 0.5 – 2         | 100                        |
|                                                   | Tigecycline                  | 0.12                     | 1                 | 0.06 – 2        | 100                        |
|                                                   | Levofloxacin                 | 1                        | >4                | ≤0.03 – >4      | 58.6                       |
| Meropenem-nonsusceptible (1)                      | Ceftazidime–avibactam        | — <sup>b</sup>           | —                 | 0.5             | 100                        |
|                                                   | Ceftazidime                  | —                        | —                 | 16              | 0                          |
|                                                   | Cefepime                     | —                        | —                 | >16             | 0                          |
|                                                   | Aztreonam                    | —                        | —                 | 128             | 0                          |
|                                                   | Piperacillin–tazobactam      | —                        | —                 | >128            | 0                          |
|                                                   | Doripenem                    | —                        | —                 | 2               | 0                          |
|                                                   | Imipenem                     | —                        | —                 | 1               | 100                        |
|                                                   | Meropenem                    | —                        | —                 | 2               | 0                          |
|                                                   | Amikacin                     | —                        | —                 | >32             | 0                          |
|                                                   | Colistin (n=0) <sup>e</sup>  | —                        | —                 | ND <sup>f</sup> | ND                         |
|                                                   | Tigecycline                  | —                        | —                 | 0.06            | 100                        |
|                                                   | Levofloxacin                 | —                        | —                 | >4              | 0                          |
| Colistin-resistant (3) <sup>g</sup>               | Ceftazidime–avibactam        | — <sup>b</sup>           | —                 | 0.06 – 0.12     | 100                        |
|                                                   | Ceftazidime                  | —                        | —                 | 0.12 – 0.5      | 100                        |
|                                                   | Cefepime                     | —                        | —                 | ≤0.12 – ≤0.12   | 100                        |
|                                                   | Aztreonam                    | —                        | —                 | 0.06 – 0.5      | 100                        |
|                                                   | Piperacillin–tazobactam      | —                        | —                 | 0.5 – 2         | 100                        |
|                                                   | Doripenem                    | —                        | —                 | 0.03 – 0.06     | 100                        |
|                                                   | Imipenem                     | —                        | —                 | 0.25 – 1        | 100                        |
|                                                   | Meropenem                    | —                        | —                 | 0.03 – 0.06     | 100                        |
|                                                   | Amikacin                     | —                        | —                 | 2 – 8           | 100                        |
|                                                   | Colistin (n=3) <sup>e</sup>  | —                        | —                 | 4 – >4          | 0                          |
|                                                   | Tigecycline                  | —                        | —                 | 0.25 – 0.5      | 100                        |
|                                                   | Levofloxacin                 | —                        | —                 | 0.06 – 0.12     | 100                        |
| Multidrug-resistant (11)                          | Ceftazidime–avibactam        | 0.12                     | 0.5               | 0.06 – 0.5      | 100                        |

| Phenotype/Organism (no. of isolates) <sup>a</sup> | Antimicrobial agent          | MIC (µg/ml) <sup>b</sup> |                   |                 | % Susceptible <sup>c</sup> |
|---------------------------------------------------|------------------------------|--------------------------|-------------------|-----------------|----------------------------|
|                                                   |                              | MIC <sub>50</sub>        | MIC <sub>90</sub> | Range           |                            |
|                                                   | Ceftazidime                  | 16                       | 64                | 2 – 64          | 9.1                        |
|                                                   | Cefepime                     | >16                      | >16               | >16 – >16       | 0                          |
|                                                   | Aztreonam                    | 64                       | 64                | 8 – 128         | 0                          |
|                                                   | Piperacillin–tazobactam      | 4                        | >128              | 1 – >128        | 72.7                       |
|                                                   | Doripenem                    | 0.06                     | 0.12              | 0.06 – 2        | 90.9                       |
|                                                   | Imipenem                     | 0.25                     | 1                 | 0.25 – 1        | 100                        |
|                                                   | Meropenem                    | 0.03                     | 0.25              | 0.03 – 2        | 90.9                       |
|                                                   | Amikacin                     | 2                        | >32               | 1 – >32         | 63.6                       |
|                                                   | Colistin (n=2) <sup>e</sup>  | — <sup>b</sup>           | —                 | 0.5 – 1         | 100                        |
|                                                   | Tigecycline                  | 0.06                     | 0.25              | 0.06 – 0.25     | 100                        |
|                                                   | Levofloxacin                 | >4                       | >4                | >4 – >4         | 0                          |
| <i>Escherichia coli</i> <sup>d</sup>              |                              |                          |                   |                 |                            |
| All (48)                                          | Ceftazidime–avibactam        | 0.06                     | 0.25              | 0.03 – 0.5      | 100                        |
|                                                   | Ceftazidime                  | 0.25                     | 32                | 0.06 – 64       | 75.0                       |
|                                                   | Cefepime                     | ≤0.12                    | >16               | ≤0.12 – >16     | 64.6                       |
|                                                   | Aztreonam                    | 0.12                     | 64                | 0.06 – 128      | 70.8                       |
|                                                   | Piperacillin–tazobactam      | 2                        | 16                | 0.5 – >128      | 91.7                       |
|                                                   | Doripenem                    | 0.06                     | 0.06              | 0.03 – 2        | 97.9                       |
|                                                   | Imipenem                     | 0.25                     | 0.25              | 0.12 – 1        | 100                        |
|                                                   | Meropenem                    | 0.03                     | 0.06              | 0.015 – 2       | 97.9                       |
|                                                   | Amikacin                     | 2                        | 32                | 2 – >32         | 85.4                       |
|                                                   | Colistin (n=25) <sup>e</sup> | 0.5                      | 1                 | 0.5 – 4         | 96.0                       |
|                                                   | Tigecycline                  | 0.12                     | 0.25              | 0.06 – 1        | 100                        |
|                                                   | Levofloxacin                 | 0.5                      | >4                | ≤0.03 – >4      | 56.3                       |
| Ceftazidime-nonsusceptible (12)                   | Ceftazidime–avibactam        | 0.12                     | 0.5               | 0.06 – 0.5      | 100                        |
|                                                   | Ceftazidime                  | 16                       | 64                | 16 – 64         | 0                          |
|                                                   | Cefepime                     | >16                      | >16               | ≤0.12 – >16     | 16.7                       |
|                                                   | Aztreonam                    | 64                       | 64                | 4 – 128         | 16.7                       |
|                                                   | Piperacillin–tazobactam      | 2                        | >128              | 1 – >128        | 75.0                       |
|                                                   | Doripenem                    | 0.06                     | 0.12              | 0.03 – 2        | 91.7                       |
|                                                   | Imipenem                     | 0.25                     | 1                 | 0.12 – 1        | 100                        |
|                                                   | Meropenem                    | 0.03                     | 0.25              | 0.03 – 2        | 91.7                       |
|                                                   | Amikacin                     | 2                        | >32               | 2 – >32         | 66.7                       |
|                                                   | Colistin (n=3) <sup>e</sup>  | — <sup>b</sup>           | —                 | 0.5 – 1         | 100                        |
|                                                   | Tigecycline                  | 0.06                     | 0.25              | 0.06 – 0.25     | 100                        |
|                                                   | Levofloxacin                 | >4                       | >4                | 0.5 – >4        | 16.7                       |
| Meropenem-nonsusceptible (1)                      | Ceftazidime–avibactam        | — <sup>b</sup>           | —                 | 0.5             | 100                        |
|                                                   | Ceftazidime                  | —                        | —                 | 16              | 0                          |
|                                                   | Cefepime                     | —                        | —                 | >16             | 0                          |
|                                                   | Aztreonam                    | —                        | —                 | 128             | 0                          |
|                                                   | Piperacillin–tazobactam      | —                        | —                 | >128            | 0                          |
|                                                   | Doripenem                    | —                        | —                 | 2               | 0                          |
|                                                   | Imipenem                     | —                        | —                 | 1               | 100                        |
|                                                   | Meropenem                    | —                        | —                 | 2               | 0                          |
|                                                   | Amikacin                     | —                        | —                 | >32             | 0                          |
|                                                   | Colistin (n=0) <sup>e</sup>  | —                        | —                 | ND <sup>f</sup> | ND                         |
|                                                   | Tigecycline                  | —                        | —                 | 0.06            | 100                        |
|                                                   | Levofloxacin                 | —                        | —                 | >4              | 0                          |
| Colistin-resistant (1)                            | Ceftazidime–avibactam        | — <sup>b</sup>           | —                 | 0.06            | 100                        |
|                                                   | Ceftazidime                  | —                        | —                 | 0.12            | 100                        |
|                                                   | Cefepime                     | —                        | —                 | ≤0.12           | 100                        |
|                                                   | Aztreonam                    | —                        | —                 | 0.06            | 100                        |
|                                                   | Piperacillin–tazobactam      | —                        | —                 | 0.5             | 100                        |
|                                                   | Doripenem                    | —                        | —                 | 0.03            | 100                        |
|                                                   | Imipenem                     | —                        | —                 | 0.25            | 100                        |
|                                                   | Meropenem                    | —                        | —                 | 0.03            | 100                        |
|                                                   | Amikacin                     | —                        | —                 | 8               | 100                        |
|                                                   | Colistin (n=1) <sup>e</sup>  | —                        | —                 | 4               | 0                          |
|                                                   | Tigecycline                  | —                        | —                 | 0.25            | 100                        |
|                                                   | Levofloxacin                 | —                        | —                 | 0.12            | 100                        |

| Phenotype/Organism (no. of isolates) <sup>a</sup> | Antimicrobial agent            | MIC (µg/ml) <sup>b</sup> |                   |                 | % Susceptible <sup>c</sup> |     |
|---------------------------------------------------|--------------------------------|--------------------------|-------------------|-----------------|----------------------------|-----|
|                                                   |                                | MIC <sub>50</sub>        | MIC <sub>90</sub> | Range           |                            |     |
| Multidrug-resistant (10)                          | Ceftazidime-avibactam          | 0.12                     | 0.5               | 0.06 – 0.5      | 100                        |     |
|                                                   | Ceftazidime                    | 16                       | 64                | 2 – 64          | 10.0                       |     |
|                                                   | Cefepime                       | >16                      | >16               | >16 – >16       | 0                          |     |
|                                                   | Aztreonam                      | 64                       | 64                | 8 – 128         | 0                          |     |
|                                                   | Piperacillin-tazobactam        | 2                        | >128              | 1 – >128        | 70.0                       |     |
|                                                   | Doripenem                      | 0.06                     | 0.12              | 0.06 – 2        | 90.0                       |     |
|                                                   | Imipenem                       | 0.25                     | 1                 | 0.25 – 1        | 100                        |     |
|                                                   | Meropenem                      | 0.03                     | 0.25              | 0.03 – 2        | 90.0                       |     |
|                                                   | Amikacin                       | 2                        | >32               | 2 – >32         | 60.0                       |     |
|                                                   | Colistin (n=2) <sup>e</sup>    | — <sup>b</sup>           | —                 | 0.5 – 1         | 100                        |     |
|                                                   | Tigecycline                    | 0.06                     | 0.25              | 0.06 – 0.25     | 100                        |     |
|                                                   | Levofloxacin                   | >4                       | >4                | >4 – >4         | 0                          |     |
| <i>Klebsiella pneumoniae</i> <sup>d</sup>         |                                |                          |                   |                 |                            |     |
| All (40)                                          | Ceftazidime-avibactam          | 0.12                     | 0.25              | 0.03 – 0.5      | 100                        |     |
|                                                   | Ceftazidime                    | 0.25                     | 64                | 0.06 – 128      | 77.5                       |     |
|                                                   | Cefepime                       | ≤0.12                    | >16               | ≤0.12 – >16     | 85.0                       |     |
|                                                   | Aztreonam                      | 0.12                     | 32                | 0.03 – 128      | 80.0                       |     |
|                                                   | Piperacillin-tazobactam        | 2                        | 4                 | ≤0.25 – 16      | 100                        |     |
|                                                   | Doripenem                      | 0.06                     | 0.12              | 0.03 – 0.25     | 100                        |     |
|                                                   | Imipenem                       | 0.25                     | 1                 | 0.12 – 4        | 90.0                       |     |
|                                                   | Meropenem                      | 0.06                     | 0.06              | 0.03 – 0.12     | 100                        |     |
|                                                   | Amikacin                       | 1                        | 2                 | 0.5 – 4         | 100                        |     |
|                                                   | Colistin (n=25) <sup>e</sup>   | 1                        | 1                 | 1 – 2           | 100                        |     |
|                                                   | Tigecycline                    | 0.5                      | 1                 | 0.06 – 2        | 100                        |     |
|                                                   | Levofloxacin                   | 0.12                     | 1                 | ≤0.03 – >4      | 95.0                       |     |
|                                                   | Ceftazidime-nonsusceptible (9) | Ceftazidime-avibactam    | — <sup>b</sup>    | —               | 0.06 – 0.5                 | 100 |
|                                                   |                                | Ceftazidime              | —                 | —               | 8 – 128                    | 0   |
| Cefepime                                          |                                | —                        | —                 | ≤0.12 – >16     | 44.4                       |     |
| Aztreonam                                         |                                | —                        | —                 | 4 – 128         | 11.1                       |     |
| Piperacillin-tazobactam                           |                                | —                        | —                 | 2 – 16          | 100                        |     |
| Doripenem                                         |                                | —                        | —                 | 0.06 – 0.25     | 100                        |     |
| Imipenem                                          |                                | —                        | —                 | 0.25 – 4        | 66.7                       |     |
| Meropenem                                         |                                | —                        | —                 | 0.06 – 0.12     | 100                        |     |
| Amikacin                                          |                                | —                        | —                 | 1 – 4           | 100                        |     |
| Colistin (n=6) <sup>e</sup>                       |                                | —                        | —                 | 1 – 1           | 100                        |     |
| Tigecycline                                       |                                | —                        | —                 | 0.12 – 2        | 100                        |     |
| Levofloxacin                                      |                                | —                        | —                 | 0.5 – >4        | 88.9                       |     |
| Multidrug-resistant (1)                           | Ceftazidime-avibactam          | — <sup>b</sup>           | —                 | 0.5             | 100                        |     |
|                                                   | Ceftazidime                    | —                        | —                 | 64              | 0                          |     |
|                                                   | Cefepime                       | —                        | —                 | >16             | 0                          |     |
|                                                   | Aztreonam                      | —                        | —                 | 64              | 0                          |     |
|                                                   | Piperacillin-tazobactam        | —                        | —                 | 16              | 100                        |     |
|                                                   | Doripenem                      | —                        | —                 | 0.12            | 100                        |     |
|                                                   | Imipenem                       | —                        | —                 | 0.25            | 100                        |     |
|                                                   | Meropenem                      | —                        | —                 | 0.06            | 100                        |     |
|                                                   | Amikacin                       | —                        | —                 | 1               | 100                        |     |
|                                                   | Colistin (n=0) <sup>e</sup>    | —                        | —                 | ND <sup>f</sup> | ND                         |     |
|                                                   | Tigecycline                    | —                        | —                 | 0.12            | 100                        |     |
|                                                   | Levofloxacin                   | —                        | —                 | >4              | 0                          |     |
| <i>Klebsiella oxytoca</i> <sup>d</sup>            |                                |                          |                   |                 |                            |     |
| All (8)                                           | Ceftazidime-avibactam          | — <sup>b</sup>           | —                 | 0.06 – 0.12     | 100                        |     |
|                                                   | Ceftazidime                    | —                        | —                 | 0.06 – 0.25     | 100                        |     |
|                                                   | Cefepime                       | —                        | —                 | ≤0.12 – 0.5     | 100                        |     |
|                                                   | Aztreonam                      | —                        | —                 | 0.06 – 0.5      | 100                        |     |
|                                                   | Piperacillin-tazobactam        | —                        | —                 | 0.5 – 4         | 100                        |     |
|                                                   | Doripenem                      | —                        | —                 | 0.06 – 0.12     | 100                        |     |
|                                                   | Imipenem                       | —                        | —                 | 0.25 – 1        | 100                        |     |
|                                                   | Meropenem                      | —                        | —                 | 0.03 – 0.25     | 100                        |     |
|                                                   | Amikacin                       | —                        | —                 | 1 – 4           | 100                        |     |

| Phenotype/Organism (no. of isolates) <sup>a</sup> | Antimicrobial agent         | MIC (µg/ml) <sup>b</sup> |                   |             | % Susceptible <sup>c</sup> |
|---------------------------------------------------|-----------------------------|--------------------------|-------------------|-------------|----------------------------|
|                                                   |                             | MIC <sub>50</sub>        | MIC <sub>90</sub> | Range       |                            |
| Colistin-resistant (1)                            | Colistin (n=5) <sup>e</sup> | —                        | —                 | 0.5 – 4     | 80.0                       |
|                                                   | Tigecycline                 | —                        | —                 | 0.06 – 0.5  | 100                        |
|                                                   | Levofloxacin                | —                        | —                 | ≤0.03 – >4  | 87.5                       |
|                                                   | Ceftazidime–avibactam       | — <sup>b</sup>           | —                 | 0.12        | 100                        |
|                                                   | Ceftazidime                 | —                        | —                 | 0.12        | 100                        |
|                                                   | Cefepime                    | —                        | —                 | ≤0.12       | 100                        |
|                                                   | Aztreonam                   | —                        | —                 | 0.5         | 100                        |
|                                                   | Piperacillin–tazobactam     | —                        | —                 | 2           | 100                        |
|                                                   | Doripenem                   | —                        | —                 | 0.06        | 100                        |
|                                                   | Imipenem                    | —                        | —                 | 0.25        | 100                        |
|                                                   | Meropenem                   | —                        | —                 | 0.06        | 100                        |
|                                                   | Amikacin                    | —                        | —                 | 2           | 100                        |
|                                                   | Colistin (n=1) <sup>e</sup> | —                        | —                 | 4           | 0                          |
|                                                   | Tigecycline                 | —                        | —                 | 0.5         | 100                        |
|                                                   | Levofloxacin                | —                        | —                 | 0.06        | 100                        |
| <i>Enterobacter</i> spp. <sup>d</sup>             |                             |                          |                   |             |                            |
| All (20) <sup>h</sup>                             |                             |                          |                   |             |                            |
|                                                   | Ceftazidime–avibactam       | 0.12                     | 0.5               | 0.03 – 0.5  | 100                        |
|                                                   | Ceftazidime                 | 0.25                     | 32                | 0.06 – 128  | 75.0                       |
|                                                   | Cefepime                    | ≤0.12                    | ≤0.12             | ≤0.12 – >16 | 95.0                       |
|                                                   | Aztreonam                   | 0.12                     | 32                | ≤0.015 – 64 | 75.0                       |
|                                                   | Piperacillin–tazobactam     | 2                        | 16                | 0.5 – 128   | 90.0                       |
|                                                   | Doripenem                   | 0.06                     | 0.25              | 0.03 – 0.25 | 100                        |
|                                                   | Imipenem                    | 1                        | 2                 | 0.25 – 2    | 75.0                       |
|                                                   | Meropenem                   | 0.03                     | 0.06              | 0.03 – 0.12 | 100                        |
|                                                   | Amikacin                    | 1                        | 4                 | 0.5 – 4     | 100                        |
|                                                   | Colistin (n=9) <sup>e</sup> | — <sup>b</sup>           | —                 | 0.5 – >4    | 88.9                       |
|                                                   | Tigecycline                 | 0.06                     | 1                 | 0.06 – 2    | 100                        |
|                                                   | Levofloxacin                | 0.06                     | 0.5               | ≤0.03 – 4   | 95.0                       |
| Ceftazidime-nonsusceptible (5)                    |                             |                          |                   |             |                            |
|                                                   | Ceftazidime–avibactam       | — <sup>b</sup>           | —                 | 0.03 – 0.5  | 100                        |
|                                                   | Ceftazidime                 | —                        | —                 | 8 – 128     | 0                          |
|                                                   | Cefepime                    | —                        | —                 | ≤0.12 – >16 | 80.0                       |
|                                                   | Aztreonam                   | —                        | —                 | 16 – 64     | 0                          |
|                                                   | Piperacillin–tazobactam     | —                        | —                 | 8 – 128     | 60.0                       |
|                                                   | Doripenem                   | —                        | —                 | 0.06 – 0.25 | 100                        |
|                                                   | Imipenem                    | —                        | —                 | 0.25 – 2    | 80.0                       |
|                                                   | Meropenem                   | —                        | —                 | 0.03 – 0.12 | 100                        |
|                                                   | Amikacin                    | —                        | —                 | 1 – 4       | 100                        |
|                                                   | Colistin (n=1) <sup>e</sup> | —                        | —                 | 0.5 – 0.5   | 100                        |
|                                                   | Tigecycline                 | —                        | —                 | 0.06 – 2    | 100                        |
|                                                   | Levofloxacin                | —                        | —                 | ≤0.03 – 4   | 80.0                       |
| Colistin-resistant (1)                            |                             |                          |                   |             |                            |
|                                                   | Ceftazidime–avibactam       | — <sup>b</sup>           | —                 | 0.06        | 100                        |
|                                                   | Ceftazidime                 | —                        | —                 | 0.5         | 100                        |
|                                                   | Cefepime                    | —                        | —                 | ≤0.12       | 100                        |
|                                                   | Aztreonam                   | —                        | —                 | 0.12        | 100                        |
|                                                   | Piperacillin–tazobactam     | —                        | —                 | 0.5         | 100                        |
|                                                   | Doripenem                   | —                        | —                 | 0.06        | 100                        |
|                                                   | Imipenem                    | —                        | —                 | 1           | 100                        |
|                                                   | Meropenem                   | —                        | —                 | 0.06        | 100                        |
|                                                   | Amikacin                    | —                        | —                 | 2           | 100                        |
|                                                   | Colistin (n=1) <sup>e</sup> | —                        | —                 | >4          | 0                          |
|                                                   | Tigecycline                 | —                        | —                 | 0.5         | 100                        |
|                                                   | Levofloxacin                | —                        | —                 | 0.06        | 100                        |
| <i>Citrobacter</i> spp. <sup>d</sup>              |                             |                          |                   |             |                            |
| All (10) <sup>i</sup>                             |                             |                          |                   |             |                            |
|                                                   | Ceftazidime–avibactam       | 0.12                     | 0.25              | 0.03 – 0.25 | 100                        |
|                                                   | Ceftazidime                 | 0.12                     | 64                | 0.12 – 128  | 80.0                       |
|                                                   | Cefepime                    | ≤0.12                    | 0.5               | ≤0.12 – 1   | 100                        |
|                                                   | Aztreonam                   | 0.06                     | 16                | 0.06 – 32   | 80.0                       |
|                                                   | Piperacillin–tazobactam     | 2                        | 4                 | 0.5 – 16    | 100                        |
|                                                   | Doripenem                   | 0.06                     | 0.12              | 0.03 – 0.12 | 100                        |

| Phenotype/Organism (no. of isolates) <sup>a</sup> | Antimicrobial agent          | MIC (µg/ml) <sup>b</sup> |                   |                 | % Susceptible <sup>c</sup> |
|---------------------------------------------------|------------------------------|--------------------------|-------------------|-----------------|----------------------------|
|                                                   |                              | MIC <sub>50</sub>        | MIC <sub>90</sub> | Range           |                            |
|                                                   | Imipenem                     | 0.25                     | 2                 | 0.12 – 2        | 80.0                       |
|                                                   | Meropenem                    | 0.03                     | 0.06              | 0.03 – 0.06     | 100                        |
|                                                   | Amikacin                     | 1                        | 2                 | 0.5 – 8         | 100                        |
|                                                   | Colistin (n=5) <sup>e</sup>  | — <sup>b</sup>           | —                 | 0.5 – 2         | 100                        |
|                                                   | Tigecycline                  | 0.06                     | 0.5               | 0.06 – 1        | 100                        |
|                                                   | Levofloxacin                 | ≤0.03                    | 0.25              | ≤0.03 – 0.25    | 100                        |
| Ceftazidime-nonsusceptible (2)                    | Ceftazidime–avibactam        | — <sup>b</sup>           | —                 | 0.12 – 0.25     | 100                        |
|                                                   | Ceftazidime                  | —                        | —                 | 64 – 128        | 0                          |
|                                                   | Cefepime                     | —                        | —                 | 0.5 – 1         | 100                        |
|                                                   | Aztreonam                    | —                        | —                 | 16 – 32         | 0                          |
|                                                   | Piperacillin–tazobactam      | —                        | —                 | 4 – 16          | 100                        |
|                                                   | Doripenem                    | —                        | —                 | 0.06 – 0.12     | 100                        |
|                                                   | Imipenem                     | —                        | —                 | 1 – 2           | 50.0                       |
|                                                   | Meropenem                    | —                        | —                 | 0.06 – 0.06     | 100                        |
|                                                   | Amikacin                     | —                        | —                 | 2 – 8           | 100                        |
|                                                   | Colistin (n=2) <sup>e</sup>  | —                        | —                 | 1 – 2           | 100                        |
|                                                   | Tigecycline                  | —                        | —                 | 0.25 – 1        | 100                        |
|                                                   | Levofloxacin                 | —                        | —                 | 0.25 – 0.25     | 100                        |
| Proteace <sup>d</sup>                             |                              |                          |                   |                 |                            |
| All (17) <sup>j</sup>                             | Ceftazidime–avibactam        | 0.03                     | 0.12              | 0.03 – 0.12     | 100                        |
|                                                   | Ceftazidime                  | 0.06                     | 1                 | 0.03 – 64       | 94.1                       |
|                                                   | Cefepime                     | ≤0.12                    | ≤0.12             | ≤0.12 – 0.25    | 100                        |
|                                                   | Aztreonam                    | ≤0.015                   | 0.06              | ≤0.015 – 1      | 100                        |
|                                                   | Piperacillin–tazobactam      | ≤0.25                    | 1                 | ≤0.25 – 2       | 100                        |
|                                                   | Doripenem                    | 0.25                     | 1                 | 0.12 – 2        | 94.1                       |
|                                                   | Imipenem                     | 2                        | 4                 | 1 – 4           | 11.8                       |
|                                                   | Meropenem                    | 0.12                     | 0.12              | 0.06 – 0.25     | 100                        |
|                                                   | Amikacin                     | 2                        | 8                 | 1 – 16          | 100                        |
|                                                   | Colistin (n=10) <sup>e</sup> | >4                       | >4                | >4 – >4         | 0                          |
|                                                   | Tigecycline                  | 2                        | 4                 | 0.12 – 4        | 52.9                       |
|                                                   | Levofloxacin                 | 0.06                     | 4                 | ≤0.03 – >4      | 76.5                       |
| Ceftazidime-nonsusceptible (1)                    | Ceftazidime–avibactam        | — <sup>b</sup>           | —                 | 0.06            | 100                        |
|                                                   | Ceftazidime                  | —                        | —                 | 64              | 0                          |
|                                                   | Cefepime                     | —                        | —                 | ≤0.12           | 100                        |
|                                                   | Aztreonam                    | —                        | —                 | 1               | 100                        |
|                                                   | Piperacillin–tazobactam      | —                        | —                 | ≤0.25           | 100                        |
|                                                   | Doripenem                    | —                        | —                 | 1               | 100                        |
|                                                   | Imipenem                     | —                        | —                 | 4               | 0                          |
|                                                   | Meropenem                    | —                        | —                 | 0.25            | 100                        |
|                                                   | Amikacin                     | —                        | —                 | 2               | 100                        |
|                                                   | Colistin (n=0) <sup>e</sup>  | —                        | —                 | ND <sup>f</sup> | ND                         |
|                                                   | Tigecycline                  | —                        | —                 | 0.12            | 100                        |
|                                                   | Levofloxacin                 | —                        | —                 | ≤0.03           | 100                        |
| Other <i>Enterobacteriaceae</i> <sup>d</sup>      |                              |                          |                   |                 |                            |
| All (3) <sup>k</sup>                              | Ceftazidime–avibactam        | — <sup>b</sup>           | —                 | 0.12 – 0.12     | 100                        |
|                                                   | Ceftazidime                  | —                        | —                 | 0.12 – 0.25     | 100                        |
|                                                   | Cefepime                     | —                        | —                 | ≤0.12 – ≤0.12   | 100                        |
|                                                   | Aztreonam                    | —                        | —                 | 0.06 – 0.12     | 100                        |
|                                                   | Piperacillin–tazobactam      | —                        | —                 | 0.5 – 1         | 100                        |
|                                                   | Doripenem                    | —                        | —                 | 0.12 – 0.25     | 100                        |
|                                                   | Imipenem                     | —                        | —                 | 1 – 1           | 100                        |
|                                                   | Meropenem                    | —                        | —                 | 0.06 – 0.12     | 100                        |
|                                                   | Amikacin                     | —                        | —                 | 2 – 2           | 100                        |
|                                                   | Colistin (n=2) <sup>e</sup>  | —                        | —                 | >4 – >4         | 0                          |
|                                                   | Tigecycline                  | —                        | —                 | 1 – 2           | 100                        |
|                                                   | Levofloxacin                 | —                        | —                 | 0.12 – 0.12     | 100                        |
| <i>Pseudomonas aeruginosa</i> <sup>d</sup>        |                              |                          |                   |                 |                            |
| All (36)                                          | Ceftazidime–avibactam        | 2                        | 8                 | 1 – 8           | 100                        |
|                                                   | Ceftazidime                  | 2                        | 64                | 2 – 128         | 75.0                       |



| Phenotype/Organism (no. of isolates) <sup>a</sup> | Antimicrobial agent          | MIC (μg/ml) <sup>b</sup> |                   |                 | % Susceptible <sup>c</sup> |
|---------------------------------------------------|------------------------------|--------------------------|-------------------|-----------------|----------------------------|
|                                                   |                              | MIC <sub>50</sub>        | MIC <sub>90</sub> | Range           |                            |
|                                                   | Cefepime                     | 2                        | 8                 | 1 – 16          | 94.4                       |
|                                                   | Aztreonam                    | 8                        | 64                | 4 – 64          | 61.1                       |
|                                                   | Piperacillin–tazobactam      | 8                        | 64                | 4 – >128        | 75.0                       |
|                                                   | Doripenem                    | 0.5                      | >4                | 0.12 – >4       | 72.2                       |
|                                                   | Imipenem                     | 2                        | >8                | 0.5 – >8        | 50.0                       |
|                                                   | Meropenem                    | 1                        | >8                | ≤0.06 – >8      | 72.2                       |
|                                                   | Amikacin                     | 4                        | 4                 | 2 – 8           | 100                        |
|                                                   | Colistin (n=24) <sup>e</sup> | 2                        | 4                 | ≤0.12 – 4       | 87.5                       |
|                                                   | Levofloxacin                 | 0.5                      | 2                 | 0.25 – >4       | 91.7                       |
| Ceftazidime-nonsusceptible (9)                    | Ceftazidime–avibactam        | — <sup>b</sup>           | —                 | 2 – 8           | 100                        |
|                                                   | Ceftazidime                  | —                        | —                 | 16 – 128        | 0                          |
|                                                   | Cefepime                     | —                        | —                 | 2 – 16          | 77.8                       |
|                                                   | Aztreonam                    | —                        | —                 | 8 – 64          | 22.2                       |
|                                                   | Piperacillin–tazobactam      | —                        | —                 | 4 – >128        | 44.4                       |
|                                                   | Doripenem                    | —                        | —                 | 0.5 – >4        | 44.4                       |
|                                                   | Imipenem                     | —                        | —                 | 0.5 – >8        | 44.4                       |
|                                                   | Meropenem                    | —                        | —                 | 1 – >8          | 55.6                       |
|                                                   | Amikacin                     | —                        | —                 | 2 – 8           | 100                        |
|                                                   | Colistin (n=7) <sup>e</sup>  | —                        | —                 | 1 – 2           | 100                        |
|                                                   | Levofloxacin                 | —                        | —                 | 0.5 – >4        | 77.8                       |
| Meropenem-nonsusceptible (10)                     | Ceftazidime–avibactam        | 4                        | 8                 | 1 – 8           | 100                        |
|                                                   | Ceftazidime                  | 8                        | 64                | 2 – 64          | 60.0                       |
|                                                   | Cefepime                     | 8                        | 8                 | 2 – 16          | 90.0                       |
|                                                   | Aztreonam                    | 32                       | 64                | 8 – 64          | 20.0                       |
|                                                   | Piperacillin–tazobactam      | 32                       | 64                | 4 – >128        | 30.0                       |
|                                                   | Doripenem                    | 4                        | >4                | 2 – >4          | 10.0                       |
|                                                   | Imipenem                     | >8                       | >8                | 8 – >8          | 0                          |
|                                                   | Meropenem                    | 8                        | >8                | 4 – >8          | 0                          |
|                                                   | Amikacin                     | 2                        | 4                 | 2 – 4           | 100                        |
|                                                   | Colistin (n=6) <sup>e</sup>  | — <sup>b</sup>           | —                 | 2 – 2           | 100                        |
|                                                   | Levofloxacin                 | 1                        | 2                 | 0.25 – >4       | 90.0                       |
| Multidrug-resistant (3)                           | Ceftazidime–avibactam        | — <sup>b</sup>           | —                 | 4 – 8           | 100                        |
|                                                   | Ceftazidime                  | —                        | —                 | 8 – 64          | 33.3                       |
|                                                   | Cefepime                     | —                        | —                 | 8 – 16          | 33.3                       |
|                                                   | Aztreonam                    | —                        | —                 | 32 – 64         | 0                          |
|                                                   | Piperacillin–tazobactam      | —                        | —                 | 32 – >128       | 0                          |
|                                                   | Doripenem                    | —                        | —                 | 4 – >4          | 0                          |
|                                                   | Imipenem                     | —                        | —                 | 2 – >8          | 33.3                       |
|                                                   | Meropenem                    | —                        | —                 | 2 – >8          | 33.3                       |
|                                                   | Amikacin                     | —                        | —                 | 2 – 4           | 100                        |
|                                                   | Colistin (n=0) <sup>e</sup>  | —                        | —                 | ND <sup>f</sup> | ND                         |
|                                                   | Levofloxacin                 | —                        | —                 | 0.5 – >4        | 33.3                       |

<sup>a</sup> MBL–negative, no gene encoding a metallo–β–lactamase was detected by PCR.

<sup>b</sup> —, MIC<sub>50</sub> and MIC<sub>90</sub> were not calculated for n < 10 isolates.

<sup>c</sup> % Susceptibility was determined according to CLSI 2016 breakpoints with the exception of ceftazidime–avibactam and tigecycline, where US FDA breakpoints were applied. Because CLSI colistin breakpoints are not available for the *Enterobacteriaceae*, susceptibility for this organism group was determined using the EUCAST 2016 breakpoints for colistin.

<sup>d</sup> All isolates were MBL–negative.

<sup>e</sup> Values are for colistin tested without 0.002% polysorbate–80; isolates collected in 2014–2015 only.

<sup>f</sup> ND, not determined; MIC range and % susceptible were not calculated for n=0 isolates.

<sup>g</sup> Excludes isolates of *Proteaeae* and *Serratia* spp. that are intrinsically resistant to colistin.

<sup>h</sup> *Enterobacter* spp. includes *Enterobacter aerogenes* (n=10), *Enterobacter asburiae* (n=1), and *Enterobacter cloacae* (n=9).

<sup>i</sup> *Citrobacter* spp. includes *Citrobacter freundii* (n=3) and *Citrobacter koseri* (n=7).

<sup>j</sup> Proteeae includes *Morganella morgani* (n=4), *Proteus mirabilis* (n=8), *Proteus penneri* (n=1), *Proteus vulgaris* (n=2), *Providencia rettgeri* (n=1), and *Providencia stuartii* (n=1).

<sup>k</sup> Other *Enterobacteriaceae* includes *Serratia marcescens* (n=3).

**Supplemental Table S4B.** Hong Kong – *In vitro* activities of ceftazidime–avibactam and comparator antimicrobial agents tested against 30 isolates of  $\beta$ –lactamase–positive *Enterobacteriaceae* (n=17) and *P. aeruginosa* (n=13) collected as part of the INFORM global surveillance program in 2013–2014.

| Organism/Genotype (no. of isolates) <sup>a</sup>                                       | Antimicrobial agent                            | MIC ( $\mu\text{g/ml}$ ) <sup>b</sup> |                   |                           | % Susceptible <sup>c</sup> |
|----------------------------------------------------------------------------------------|------------------------------------------------|---------------------------------------|-------------------|---------------------------|----------------------------|
|                                                                                        |                                                | MIC <sub>50</sub>                     | MIC <sub>90</sub> | Range                     |                            |
| <i>Enterobacteriaceae</i> (17)<br>OSBL–positive (2)                                    | Ceftazidime–avibactam                          | — <sup>b</sup>                        | —                 | 0.03 – 0.06               | 100                        |
|                                                                                        | Ceftazidime                                    | —                                     | —                 | 0.06 – 0.12               | 100                        |
|                                                                                        | Cefepime                                       | —                                     | —                 | $\leq 0.12$ – $\leq 0.12$ | 100                        |
|                                                                                        | Aztreonam                                      | —                                     | —                 | $\leq 0.015$ – 0.03       | 100                        |
|                                                                                        | Piperacillin–tazobactam                        | —                                     | —                 | $\leq 0.25$ – 2           | 100                        |
|                                                                                        | Doripenem                                      | —                                     | —                 | 0.25 – 2                  | 50.0                       |
|                                                                                        | Imipenem                                       | —                                     | —                 | 2 – 4                     | 0                          |
|                                                                                        | Meropenem                                      | —                                     | —                 | 0.06 – 0.12               | 100                        |
|                                                                                        | Amikacin                                       | —                                     | —                 | 2 – 4                     | 100                        |
|                                                                                        | Colistin (n=2) <sup>d</sup>                    | —                                     | —                 | 1 – $>4$                  | 50.0                       |
|                                                                                        | Tigecycline                                    | —                                     | —                 | 1 – 4                     | 50.0                       |
|                                                                                        | Levofloxacin                                   | —                                     | —                 | 4 – $>4$                  | 0                          |
|                                                                                        | ESBL–positive (6) <sup>c</sup>                 | Ceftazidime–avibactam                 | — <sup>b</sup>    | —                         | 0.06 – 0.5                 |
| Ceftazidime                                                                            |                                                | —                                     | —                 | 1 – 64                    | 33.3                       |
| Cefepime                                                                               |                                                | —                                     | —                 | 8 – $>16$                 | 0                          |
| Aztreonam                                                                              |                                                | —                                     | —                 | 4 – 64                    | 16.7                       |
| Piperacillin–tazobactam                                                                |                                                | —                                     | —                 | 1 – 16                    | 100                        |
| Doripenem                                                                              |                                                | —                                     | —                 | 0.03 – 0.12               | 100                        |
| Imipenem                                                                               |                                                | —                                     | —                 | 0.25 – 1                  | 100                        |
| Meropenem                                                                              |                                                | —                                     | —                 | 0.03 – 0.12               | 100                        |
| Amikacin                                                                               |                                                | —                                     | —                 | 1 – 2                     | 100                        |
| Colistin (6) <sup>d</sup>                                                              |                                                | —                                     | —                 | 0.5 – 1                   | 100                        |
| Tigecycline                                                                            |                                                | —                                     | —                 | 0.25 – 2                  | 100                        |
| Levofloxacin                                                                           |                                                | —                                     | —                 | 0.5 – $>4$                | 50.0                       |
| AmpC–positive (7) <sup>f</sup>                                                         |                                                | Ceftazidime–avibactam                 | — <sup>b</sup>    | —                         | 0.03 – 0.25                |
|                                                                                        | Ceftazidime                                    | —                                     | —                 | 0.06 – 128                | 42.9                       |
|                                                                                        | Cefepime                                       | —                                     | —                 | $\leq 0.12$ – 1           | 100                        |
|                                                                                        | Aztreonam                                      | —                                     | —                 | $\leq 0.015$ – 32         | 57.1                       |
|                                                                                        | Piperacillin–tazobactam                        | —                                     | —                 | 0.5 – 16                  | 100                        |
|                                                                                        | Doripenem                                      | —                                     | —                 | 0.03 – 0.25               | 100                        |
|                                                                                        | Imipenem                                       | —                                     | —                 | 0.25 – 4                  | 14.3                       |
|                                                                                        | Meropenem                                      | —                                     | —                 | 0.03 – 0.12               | 100                        |
|                                                                                        | Amikacin                                       | —                                     | —                 | 0.5 – $>32$               | 85.7                       |
|                                                                                        | Colistin (n=7) <sup>d</sup>                    | —                                     | —                 | 0.5 – 2                   | 100                        |
|                                                                                        | Tigecycline                                    | —                                     | —                 | 0.12 – 0.5                | 100                        |
|                                                                                        | Levofloxacin                                   | —                                     | —                 | 0.06 – 2                  | 100                        |
|                                                                                        | ESBL–positive + AmpC–positive (2) <sup>g</sup> | Ceftazidime–avibactam                 | — <sup>b</sup>    | —                         | 0.25 – 0.25                |
| Ceftazidime                                                                            |                                                | —                                     | —                 | 64 – 128                  | 0                          |
| Cefepime                                                                               |                                                | —                                     | —                 | 0.5 – 1                   | 100                        |
| Aztreonam                                                                              |                                                | —                                     | —                 | 128 – 128                 | 0                          |
| Piperacillin–tazobactam                                                                |                                                | —                                     | —                 | 2 – 2                     | 100                        |
| Doripenem                                                                              |                                                | —                                     | —                 | 0.12 – 0.25               | 100                        |
| Imipenem                                                                               |                                                | —                                     | —                 | 1 – 2                     | 50.0                       |
| Meropenem                                                                              |                                                | —                                     | —                 | 0.06 – 0.06               | 100                        |
| Amikacin                                                                               |                                                | —                                     | —                 | 1 – 1                     | 100                        |
| Colistin (n=2) <sup>d</sup>                                                            |                                                | —                                     | —                 | 1 – 1                     | 100                        |
| Tigecycline                                                                            |                                                | —                                     | —                 | 0.5 – 1                   | 100                        |
| Levofloxacin                                                                           |                                                | —                                     | —                 | 1 – 1                     | 100                        |
| <i>P. aeruginosa</i> (13)<br>No acquired $\beta$ –lactamase detected (13) <sup>h</sup> |                                                | Ceftazidime–avibactam                 | 2                 | 8                         | 1 – 8                      |
|                                                                                        | Ceftazidime                                    | 2                                     | 64                | 2 – 64                    | 69.2                       |

| Organism/Genotype (no. of isolates) <sup>a</sup> | Antimicrobial agent          | MIC (µg/ml) <sup>b</sup> |                   |           | % Susceptible <sup>c</sup> |
|--------------------------------------------------|------------------------------|--------------------------|-------------------|-----------|----------------------------|
|                                                  |                              | MIC <sub>50</sub>        | MIC <sub>90</sub> | Range     |                            |
|                                                  | Cefepime                     | 4                        | 8                 | 1 – 8     | 100                        |
|                                                  | Aztreonam                    | 8                        | 64                | 4 – 64    | 61.5                       |
|                                                  | Piperacillin–tazobactam      | 8                        | 64                | 4 – 64    | 61.5                       |
|                                                  | Doripenem                    | 2                        | >4                | 0.12 – >4 | 53.8                       |
|                                                  | Imipenem                     | 4                        | >8                | 4 – >8    | 0                          |
|                                                  | Meropenem                    | 1                        | >8                | 0.12 – >8 | 53.8                       |
|                                                  | Amikacin                     | 2                        | 8                 | 2 – 8     | 100                        |
|                                                  | Colistin (n=13) <sup>d</sup> | 2                        | 2                 | 0.12 – 4  | 92.3                       |
|                                                  | Levofloxacin                 | 0.5                      | 2                 | 0.25 – >4 | 92.3                       |

<sup>a</sup> OSBL, original–spectrum β–lactamase (e.g. TEM–1, SHV–1, SHV–11); ESBL, extended–spectrum β–lactamase; MBL, metallo–β–lactamase.

<sup>b</sup> —, MIC<sub>50</sub> and MIC<sub>90</sub> were not calculated for n < 10 isolates.

<sup>c</sup> % Susceptibility was determined according to CLSI 2016 breakpoints with the exception of ceftazidime–avibactam and tigecycline, where US FDA breakpoints were applied. Because CLSI colistin breakpoints are not available for the *Enterobacteriaceae*, susceptibility for this organism group was determined using the EUCAST 2016 breakpoints for colistin.

<sup>d</sup> Values are for colistin tested without 0.002% polysorbate–80; isolates collected in 2014–2015 only.

<sup>e</sup> Includes isolates carrying CTX–M–14; CTX–M–15; CTX–M–55; with or without SHV–type or TEM–type OSBLs or enzymes of undefined spectrum.

<sup>f</sup> Includes isolates carrying CMY–2; DHA–1; and the chromosomal AmpC common to *Citrobacter* spp. and *Enterobacter* spp. with or without SHV–OSBLs and/or TEM–OSBLs.

<sup>g</sup> Isolates carrying DHA–1 and SHV–12.

<sup>h</sup> Assumed to carry the chromosomal AmpC common to *P. aeruginosa*.

**Supplemental Table S5A.** Japan – *In vitro* activities of ceftazidime–avibactam and comparator antimicrobial agents tested against 783 isolates of *Enterobacteriaceae* and 174 isolates of *P. aeruginosa* collected as part of the INFORM global surveillance program in 2012–2015.

| Phenotype/Organism (no. of isolates) <sup>a</sup> | Antimicrobial agent           | MIC (µg/ml) <sup>b</sup> |                   |               | % Susceptible <sup>c</sup> |
|---------------------------------------------------|-------------------------------|--------------------------|-------------------|---------------|----------------------------|
|                                                   |                               | MIC <sub>50</sub>        | MIC <sub>90</sub> | Range         |                            |
| <i>Enterobacteriaceae</i>                         |                               |                          |                   |               |                            |
| All (783)                                         | Ceftazidime–avibactam         | 0.12                     | 0.25              | ≤0.015 – 64   | 99.7                       |
|                                                   | Ceftazidime                   | 0.25                     | 4                 | 0.03 – >128   | 90.3                       |
|                                                   | Cefepime                      | ≤0.12                    | 4                 | ≤0.12 – >16   | 89.3                       |
|                                                   | Aztreonam                     | 0.12                     | 16                | ≤0.015 – >128 | 86.3                       |
|                                                   | Piperacillin–tazobactam       | 2                        | 16                | ≤0.25 – >128  | 92.7                       |
|                                                   | Doripenem                     | 0.06                     | 0.25              | ≤0.008 – >4   | 99.5                       |
|                                                   | Imipenem                      | 0.25                     | 2                 | 0.06 – 8      | 85.8                       |
|                                                   | Meropenem                     | 0.03                     | 0.12              | ≤0.004 – 4    | 99.7                       |
|                                                   | Amikacin                      | 2                        | 4                 | ≤0.25 – 32    | 99.9                       |
|                                                   | Colistin (n=328) <sup>d</sup> | 0.5                      | >4                | ≤0.12 – >4    | 84.5                       |
|                                                   | Tigecycline                   | 0.5                      | 2                 | ≤0.015 – 8    | 94.8                       |
|                                                   | Levofloxacin                  | 0.06                     | >4                | ≤0.03 – >4    | 80.7                       |
| All, MBL–negative (781)                           | Ceftazidime–avibactam         | 0.12                     | 0.25              | ≤0.015 – 8    | 100                        |
|                                                   | Ceftazidime                   | 0.25                     | 4                 | 0.03 – >128   | 90.5                       |
|                                                   | Cefepime                      | ≤0.12                    | 4                 | ≤0.12 – >16   | 89.5                       |
|                                                   | Aztreonam                     | 0.12                     | 16                | ≤0.015 – >128 | 86.4                       |
|                                                   | Piperacillin–tazobactam       | 2                        | 16                | ≤0.25 – >128  | 92.7                       |
|                                                   | Doripenem                     | 0.06                     | 0.25              | ≤0.008 – 2    | 99.7                       |
|                                                   | Imipenem                      | 0.25                     | 2                 | 0.06 – 8      | 86.0                       |
|                                                   | Meropenem                     | 0.03                     | 0.12              | ≤0.004 – 1    | 100                        |
|                                                   | Amikacin                      | 2                        | 4                 | ≤0.25 – 32    | 99.9                       |
|                                                   | Colistin (n=327) <sup>d</sup> | 0.5                      | >4                | ≤0.12 – >4    | 84.4                       |
|                                                   | Tigecycline                   | 0.5                      | 2                 | ≤0.015 – 8    | 94.8                       |
|                                                   | Levofloxacin                  | 0.06                     | >4                | ≤0.03 – >4    | 80.9                       |
| Ceftazidime-nonsusceptible (76)                   | Ceftazidime–avibactam         | 0.25                     | 1                 | ≤0.015 – 64   | 97.4                       |
|                                                   | Ceftazidime                   | 32                       | 128               | 8 – >128      | 0                          |
|                                                   | Cefepime                      | 4                        | >16               | ≤0.12 – >16   | 38.2                       |
|                                                   | Aztreonam                     | 32                       | 64                | 0.06 – >128   | 7.9                        |
|                                                   | Piperacillin–tazobactam       | 16                       | 128               | 0.5 – >128    | 59.2                       |
|                                                   | Doripenem                     | 0.06                     | 0.25              | 0.015 – >4    | 97.4                       |
|                                                   | Imipenem                      | 0.25                     | 2                 | 0.06 – 4      | 89.5                       |
|                                                   | Meropenem                     | 0.06                     | 0.25              | 0.015 – 4     | 97.4                       |
|                                                   | Amikacin                      | 2                        | 4                 | 0.5 – 16      | 100                        |
|                                                   | Colistin (n=22) <sup>d</sup>  | 0.5                      | 1                 | 0.25 – 1      | 100                        |
|                                                   | Tigecycline                   | 0.5                      | 2                 | 0.12 – 4      | 97.4                       |
|                                                   | Levofloxacin                  | 4                        | >4                | ≤0.03 – >4    | 47.4                       |
| Ceftazidime-nonsusceptible, MBL–negative (74)     | Ceftazidime–avibactam         | 0.25                     | 0.5               | ≤0.015 – 8    | 100                        |
|                                                   | Ceftazidime                   | 32                       | 128               | 8 – >128      | 0                          |
|                                                   | Cefepime                      | 4                        | >16               | ≤0.12 – >16   | 39.2                       |
|                                                   | Aztreonam                     | 32                       | 64                | 0.5 – >128    | 6.8                        |
|                                                   | Piperacillin–tazobactam       | 16                       | 128               | 0.5 – >128    | 58.1                       |
|                                                   | Doripenem                     | 0.06                     | 0.25              | 0.015 – 0.5   | 100                        |
|                                                   | Imipenem                      | 0.25                     | 1                 | 0.06 – 4      | 91.9                       |
|                                                   | Meropenem                     | 0.06                     | 0.12              | 0.015 – 0.25  | 100                        |
|                                                   | Amikacin                      | 2                        | 4                 | 0.5 – 16      | 100                        |
|                                                   | Colistin (n=21) <sup>d</sup>  | 0.5                      | 1                 | 0.25 – 1      | 100                        |
|                                                   | Tigecycline                   | 0.5                      | 2                 | 0.12 – 4      | 97.3                       |
|                                                   | Levofloxacin                  | 4                        | >4                | ≤0.03 – >4    | 48.7                       |
| Meropenem-nonsusceptible (2) <sup>e</sup>         | Ceftazidime–avibactam         | — <sup>b</sup>           | —                 | 32 – 64       | 0                          |
|                                                   | Ceftazidime                   | —                        | —                 | 128 – 128     | 0                          |
|                                                   | Cefepime                      | —                        | —                 | 8 – 8         | 0                          |

| Phenotype/Organism (no. of isolates) <sup>a</sup> | Antimicrobial agent                   | MIC (µg/ml) <sup>b</sup> |                   |               | % Susceptible <sup>c</sup> |
|---------------------------------------------------|---------------------------------------|--------------------------|-------------------|---------------|----------------------------|
|                                                   |                                       | MIC <sub>50</sub>        | MIC <sub>90</sub> | Range         |                            |
|                                                   | Aztreonam                             | —                        | —                 | 0.06 – 8      | 50.0                       |
|                                                   | Piperacillin–tazobactam               | —                        | —                 | 8 – 8         | 100                        |
|                                                   | Doripenem                             | —                        | —                 | 2 – >4        | 0                          |
|                                                   | Imipenem                              | —                        | —                 | 2 – 4         | 0                          |
|                                                   | Meropenem                             | —                        | —                 | 2 – 4         | 0                          |
|                                                   | Amikacin                              | —                        | —                 | 2 – 4         | 100                        |
|                                                   | Colistin (n=1) <sup>d</sup>           | —                        | —                 | 1 – 1         | 100                        |
|                                                   | Tigecycline                           | —                        | —                 | 0.5 – 0.5     | 100                        |
|                                                   | Levofloxacin                          | —                        | —                 | 4 – 4         | 0                          |
|                                                   | Colistin-resistant (4) <sup>e,f</sup> | Ceftazidime–avibactam    | — <sup>b</sup>    | —             | 0.12 – 0.5                 |
| Ceftazidime                                       |                                       | —                        | —                 | 0.12 – 4      | 100                        |
| Cefepime                                          |                                       | —                        | —                 | ≤0.12 – 16    | 75.0                       |
| Aztreonam                                         |                                       | —                        | —                 | 0.06 – 16     | 75.0                       |
| Piperacillin–tazobactam                           |                                       | —                        | —                 | 0.5 – 16      | 100                        |
| Doripenem                                         |                                       | —                        | —                 | 0.06 – 0.25   | 100                        |
| Imipenem                                          |                                       | —                        | —                 | 0.5 – 4       | 50.0                       |
| Meropenem                                         |                                       | —                        | —                 | 0.06 – 0.25   | 100                        |
| Amikacin                                          |                                       | —                        | —                 | 1 – 2         | 100                        |
| Colistin (n=4) <sup>d</sup>                       |                                       | —                        | —                 | >4 – >4       | 0                          |
| Multidrug-resistant (39) <sup>e</sup>             | Tigecycline                           | —                        | —                 | 0.5 – 2       | 100                        |
|                                                   | Levofloxacin                          | —                        | —                 | ≤0.03 – 4     | 50.0                       |
|                                                   | Ceftazidime–avibactam                 | 0.25                     | 0.5               | ≤0.015 – 8    | 100                        |
|                                                   | Ceftazidime                           | 16                       | 128               | 0.06 – >128   | 38.5                       |
|                                                   | Cefepime                              | >16                      | >16               | ≤0.12 – >16   | 12.8                       |
|                                                   | Aztreonam                             | 32                       | 128               | ≤0.015 – >128 | 2.6                        |
|                                                   | Piperacillin–tazobactam               | 8                        | >128              | 0.5 – >128    | 71.8                       |
|                                                   | Doripenem                             | 0.06                     | 0.25              | 0.015 – 0.5   | 100                        |
|                                                   | Imipenem                              | 0.25                     | 1                 | 0.06 – 2      | 92.3                       |
|                                                   | Meropenem                             | 0.06                     | 0.12              | 0.015 – 0.25  | 100                        |
| <i>Escherichia coli</i> <sup>g</sup><br>All (272) | Amikacin                              | 4                        | 8                 | 1 – 32        | 97.4                       |
|                                                   | Colistin (n=15) <sup>d</sup>          | 0.5                      | >4                | 0.25 – >4     | 86.7                       |
|                                                   | Tigecycline                           | 0.25                     | 2                 | 0.12 – 8      | 97.4                       |
|                                                   | Levofloxacin                          | >4                       | >4                | 4 – >4        | 0                          |
|                                                   | Ceftazidime–avibactam                 | 0.12                     | 0.25              | ≤0.015 – 8    | 100                        |
|                                                   | Ceftazidime                           | 0.25                     | 8                 | 0.03 – >128   | 86.4                       |
|                                                   | Cefepime                              | ≤0.12                    | 16                | ≤0.12 – >16   | 80.5                       |
|                                                   | Aztreonam                             | 0.12                     | 16                | ≤0.015 – >128 | 81.3                       |
|                                                   | Piperacillin–tazobactam               | 2                        | 4                 | ≤0.25 – >128  | 96.0                       |
|                                                   | Doripenem                             | 0.03                     | 0.06              | ≤0.008 – 0.5  | 100                        |
| Ceftazidime-nonsusceptible (37)                   | Imipenem                              | 0.25                     | 0.25              | 0.06 – 8      | 99.3                       |
|                                                   | Meropenem                             | 0.03                     | 0.06              | ≤0.004 – 0.25 | 100                        |
|                                                   | Amikacin                              | 2                        | 4                 | 0.5 – 16      | 100                        |
|                                                   | Colistin (n=101) <sup>d</sup>         | 0.5                      | 1                 | ≤0.12 – 1     | 100                        |
|                                                   | Tigecycline                           | 0.25                     | 0.5               | 0.06 – 2      | 100                        |
|                                                   | Levofloxacin                          | 0.5                      | >4                | ≤0.03 – >4    | 61.4                       |
|                                                   | Ceftazidime–avibactam                 | 0.25                     | 0.5               | ≤0.015 – 8    | 100                        |
|                                                   | Ceftazidime                           | 16                       | 64                | 8 – >128      | 0                          |
|                                                   | Cefepime                              | 16                       | >16               | ≤0.12 – >16   | 13.5                       |
|                                                   | Aztreonam                             | 32                       | 64                | 4 – >128      | 8.1                        |
| Multidrug-resistant (25)                          | Piperacillin–tazobactam               | 4                        | 16                | 0.5 – >128    | 91.9                       |
|                                                   | Doripenem                             | 0.03                     | 0.06              | 0.015 – 0.5   | 100                        |
|                                                   | Imipenem                              | 0.25                     | 0.5               | 0.06 – 2      | 97.3                       |
|                                                   | Meropenem                             | 0.03                     | 0.12              | 0.015 – 0.25  | 100                        |
|                                                   | Amikacin                              | 4                        | 8                 | 1 – 16        | 100                        |
|                                                   | Colistin (n=11) <sup>d</sup>          | 0.5                      | 0.5               | 0.25 – 0.5    | 100                        |
|                                                   | Tigecycline                           | 0.25                     | 1                 | 0.12 – 1      | 100                        |
|                                                   | Levofloxacin                          | >4                       | >4                | ≤0.03 – >4    | 18.9                       |
|                                                   | Ceftazidime–avibactam                 | 0.25                     | 0.5               | ≤0.015 – 8    | 100                        |

| Phenotype/Organism (no. of isolates) <sup>a</sup> | Antimicrobial agent          | MIC (µg/ml) <sup>b</sup> |                   |              | % Susceptible <sup>c</sup> |
|---------------------------------------------------|------------------------------|--------------------------|-------------------|--------------|----------------------------|
|                                                   |                              | MIC <sub>50</sub>        | MIC <sub>90</sub> | Range        |                            |
|                                                   | Ceftazidime                  | 16                       | 64                | 2 – >128     | 24.0                       |
|                                                   | Cefepime                     | >16                      | >16               | 16 – >16     | 0                          |
|                                                   | Aztreonam                    | 32                       | 128               | 16 – >128    | 0                          |
|                                                   | Piperacillin–tazobactam      | 4                        | 16                | 1 – >128     | 92.0                       |
|                                                   | Doripenem                    | 0.03                     | 0.06              | 0.015 – 0.5  | 100                        |
|                                                   | Imipenem                     | 0.25                     | 0.5               | 0.06 – 2     | 96.0                       |
|                                                   | Meropenem                    | 0.03                     | 0.12              | 0.015 – 0.25 | 100                        |
|                                                   | Amikacin                     | 4                        | 8                 | 1 – 8        | 100                        |
|                                                   | Colistin (n=10) <sup>d</sup> | 0.5                      | 0.5               | 0.25 – 0.5   | 100                        |
|                                                   | Tigecycline                  | 0.25                     | 0.5               | 0.12 – 1     | 100                        |
|                                                   | Levofloxacin                 | >4                       | >4                | >4 – >4      | 0                          |
| <i>Klebsiella pneumoniae</i>                      |                              |                          |                   |              |                            |
| All (190)                                         | Ceftazidime–avibactam        | 0.12                     | 0.25              | ≤0.015 – 64  | 99.0                       |
|                                                   | Ceftazidime                  | 0.12                     | 1                 | 0.03 – >128  | 95.3                       |
|                                                   | Cefepime                     | ≤0.12                    | 2                 | ≤0.12 – >16  | 91.1                       |
|                                                   | Aztreonam                    | 0.06                     | 2                 | ≤0.015 – 64  | 92.1                       |
|                                                   | Piperacillin–tazobactam      | 2                        | 8                 | 0.5 – >128   | 95.8                       |
|                                                   | Doripenem                    | 0.06                     | 0.12              | 0.03 – >4    | 99.0                       |
|                                                   | Imipenem                     | 0.25                     | 0.5               | 0.06 – 4     | 96.3                       |
|                                                   | Meropenem                    | 0.03                     | 0.06              | ≤0.004 – 4   | 99.0                       |
|                                                   | Amikacin                     | 1                        | 2                 | 0.5 – 8      | 100                        |
|                                                   | Colistin (n=99) <sup>d</sup> | 0.5                      | 1                 | 0.25 – 2     | 100                        |
|                                                   | Tigecycline                  | 0.5                      | 1                 | ≤0.015 – 4   | 97.4                       |
|                                                   | Levofloxacin                 | 0.06                     | 1                 | ≤0.03 – >4   | 93.2                       |
| All, MBL–negative (188)                           | Ceftazidime–avibactam        | 0.12                     | 0.25              | ≤0.015 – 2   | 100                        |
|                                                   | Ceftazidime                  | 0.12                     | 1                 | 0.03 – >128  | 96.3                       |
|                                                   | Cefepime                     | ≤0.12                    | 1                 | ≤0.12 – >16  | 92.0                       |
|                                                   | Aztreonam                    | 0.06                     | 2                 | ≤0.015 – 64  | 92.6                       |
|                                                   | Piperacillin–tazobactam      | 2                        | 8                 | 0.5 – >128   | 95.7                       |
|                                                   | Doripenem                    | 0.06                     | 0.12              | 0.03 – 0.25  | 100                        |
|                                                   | Imipenem                     | 0.25                     | 0.5               | 0.06 – 4     | 97.3                       |
|                                                   | Meropenem                    | 0.03                     | 0.06              | ≤0.004 – 1   | 100                        |
|                                                   | Amikacin                     | 1                        | 2                 | 0.5 – 8      | 100                        |
|                                                   | Colistin (n=98) <sup>d</sup> | 0.5                      | 1                 | 0.25 – 2     | 100                        |
|                                                   | Tigecycline                  | 0.5                      | 1                 | ≤0.015 – 4   | 97.3                       |
|                                                   | Levofloxacin                 | 0.06                     | 1                 | ≤0.03 – >8   | 94.2                       |
| Ceftazidime-nonsusceptible (9)                    | Ceftazidime–avibactam        | — <sup>b</sup>           | —                 | 0.25 – 64    | 77.8                       |
|                                                   | Ceftazidime                  | —                        | —                 | 8 – >128     | 0                          |
|                                                   | Cefepime                     | —                        | —                 | 0.5 – >16    | 11.1                       |
|                                                   | Aztreonam                    | —                        | —                 | 0.06 – 64    | 11.1                       |
|                                                   | Piperacillin–tazobactam      | —                        | —                 | 4 – >128     | 66.7                       |
|                                                   | Doripenem                    | —                        | —                 | 0.03 – >4    | 77.8                       |
|                                                   | Imipenem                     | —                        | —                 | 0.12 – 4     | 77.8                       |
|                                                   | Meropenem                    | —                        | —                 | 0.03 – 4     | 77.8                       |
|                                                   | Amikacin                     | —                        | —                 | 1 – 4        | 100                        |
|                                                   | Colistin (n=4) <sup>d</sup>  | —                        | —                 | 0.5 – 1      | 100                        |
|                                                   | Tigecycline                  | —                        | —                 | 0.5 – 2      | 100                        |
|                                                   | Levofloxacin                 | —                        | —                 | 0.06 – >4    | 33.3                       |
| Ceftazidime-nonsusceptible, MBL–negative (7)      | Ceftazidime–avibactam        | — <sup>b</sup>           | —                 | 0.25 – 1     | 100                        |
|                                                   | Ceftazidime                  | —                        | —                 | 8 – >128     | 0                          |
|                                                   | Cefepime                     | —                        | —                 | 0.5 – >16    | 14.3                       |
|                                                   | Aztreonam                    | —                        | —                 | 8 – 64       | 0                          |
|                                                   | Piperacillin–tazobactam      | —                        | —                 | 4 – >128     | 57.1                       |
|                                                   | Doripenem                    | —                        | —                 | 0.03 – 0.25  | 100                        |
|                                                   | Imipenem                     | —                        | —                 | 0.12 – 1     | 100                        |
|                                                   | Meropenem                    | —                        | —                 | 0.03 – 0.12  | 100                        |
|                                                   | Amikacin                     | —                        | —                 | 1 – 4        | 100                        |
|                                                   | Colistin (n=3) <sup>d</sup>  | —                        | —                 | 0.5 – 1      | 100                        |
|                                                   | Tigecycline                  | —                        | —                 | 0.5 – 2      | 100                        |
|                                                   | Levofloxacin                 | —                        | —                 | 0.06 – >4    | 42.9                       |

| Phenotype/Organism (no. of isolates) <sup>a</sup> | Antimicrobial agent                    | MIC (µg/ml) <sup>b</sup> |                   |              | % Susceptible <sup>c</sup> |
|---------------------------------------------------|----------------------------------------|--------------------------|-------------------|--------------|----------------------------|
|                                                   |                                        | MIC <sub>50</sub>        | MIC <sub>90</sub> | Range        |                            |
| Meropenem-nonsusceptible (2) <sup>c</sup>         | Ceftazidime-avibactam                  | — <sup>b</sup>           | —                 | 32 – 64      | 0                          |
|                                                   | Ceftazidime                            | —                        | —                 | 128 – 128    | 0                          |
|                                                   | Cefepime                               | —                        | —                 | 8 – 8        | 0                          |
|                                                   | Aztreonam                              | —                        | —                 | 0.06 – 8     | 50.0                       |
|                                                   | Piperacillin-tazobactam                | —                        | —                 | 8 – 8        | 100                        |
|                                                   | Doripenem                              | —                        | —                 | 2 – >4       | 0                          |
|                                                   | Imipenem                               | —                        | —                 | 2 – 4        | 0                          |
|                                                   | Meropenem                              | —                        | —                 | 2 – 4        | 0                          |
|                                                   | Amikacin                               | —                        | —                 | 2 – 4        | 100                        |
|                                                   | Colistin (n=1) <sup>d</sup>            | —                        | —                 | 1            | 100                        |
|                                                   | Tigecycline                            | —                        | —                 | 0.5 – 0.5    | 100                        |
| Levofloxacin                                      | —                                      | —                        | 4 – 4             | 0            |                            |
| Multidrug-resistant (3) <sup>c</sup>              | Ceftazidime-avibactam                  | — <sup>b</sup>           | —                 | 0.25 – 0.5   | 100                        |
|                                                   | Ceftazidime                            | —                        | —                 | 16 – >128    | 0                          |
|                                                   | Cefepime                               | —                        | —                 | 0.5 – >16    | 33.3                       |
|                                                   | Aztreonam                              | —                        | —                 | 32 – 64      | 0                          |
|                                                   | Piperacillin-tazobactam                | —                        | —                 | 16 – >128    | 66.7                       |
|                                                   | Doripenem                              | —                        | —                 | 0.03 – 0.25  | 100                        |
|                                                   | Imipenem                               | —                        | —                 | 0.12 – 1     | 100                        |
|                                                   | Meropenem                              | —                        | —                 | 0.03 – 0.12  | 100                        |
|                                                   | Amikacin                               | —                        | —                 | 2 – 4        | 100                        |
|                                                   | Colistin (n=2) <sup>d</sup>            | —                        | —                 | 0.5 – 1      | 100                        |
|                                                   | Tigecycline                            | —                        | —                 | 1 – 2        | 100                        |
|                                                   | Levofloxacin                           | —                        | —                 | >4 – >4      | 0                          |
|                                                   | <i>Klebsiella oxytoca</i> <sup>c</sup> |                          |                   |              |                            |
| All (47)                                          | Ceftazidime-avibactam                  | 0.12                     | 0.5               | 0.06 – 4     | 100                        |
|                                                   | Ceftazidime                            | 0.12                     | 1                 | 0.06 – 4     | 100                        |
|                                                   | Cefepime                               | ≤0.12                    | 2                 | ≤0.12 – 8    | 91.5                       |
|                                                   | Aztreonam                              | 0.25                     | 128               | 0.03 – >128  | 80.9                       |
|                                                   | Piperacillin-tazobactam                | 2                        | >128              | 0.5 – >128   | 74.5                       |
|                                                   | Doripenem                              | 0.06                     | 0.12              | 0.03 – 0.12  | 100                        |
|                                                   | Imipenem                               | 0.25                     | 0.5               | 0.12 – 1     | 100                        |
|                                                   | Meropenem                              | 0.06                     | 0.06              | 0.03 – 0.12  | 100                        |
|                                                   | Amikacin                               | 1                        | 2                 | 0.5 – 4      | 100                        |
|                                                   | Colistin (n=21) <sup>d</sup>           | 0.5                      | 1                 | 0.25 – 1     | 100                        |
|                                                   | Tigecycline                            | 0.25                     | 1                 | 0.12 – 1     | 100                        |
|                                                   | Levofloxacin                           | 0.06                     | >4                | ≤0.03 – >4   | 87.2                       |
|                                                   | Multidrug-resistant (6)                | Ceftazidime-avibactam    | — <sup>b</sup>    | —            | 0.5 – 4                    |
| Ceftazidime                                       |                                        | —                        | —                 | 1 – 4        | 100                        |
| Cefepime                                          |                                        | —                        | —                 | 2 – 8        | 50.0                       |
| Aztreonam                                         |                                        | —                        | —                 | 64 – >128    | 0                          |
| Piperacillin-tazobactam                           |                                        | —                        | —                 | >128 – >128  | 0                          |
| Doripenem                                         |                                        | —                        | —                 | 0.06 – 0.12  | 100                        |
| Imipenem                                          |                                        | —                        | —                 | 0.12 – 0.5   | 100                        |
| Meropenem                                         |                                        | —                        | —                 | 0.06 – 0.12  | 100                        |
| Amikacin                                          |                                        | —                        | —                 | 1 – 2        | 100                        |
| Colistin (n=1) <sup>d</sup>                       |                                        | —                        | —                 | 0.25         | 100                        |
| Tigecycline                                       |                                        | —                        | —                 | 0.5 – 1      | 100                        |
| Levofloxacin                                      |                                        | —                        | —                 | >4 – >4      | 0                          |
| <i>Enterobacter</i> spp. <sup>c</sup>             |                                        |                          |                   |              |                            |
| All (95) <sup>g</sup>                             | Ceftazidime-avibactam                  | 0.25                     | 0.5               | ≤0.015 – 1   | 100                        |
|                                                   | Ceftazidime                            | 0.25                     | 64                | 0.06 – >128  | 73.7                       |
|                                                   | Cefepime                               | ≤0.12                    | 1                 | ≤0.12 – >16  | 91.6                       |
|                                                   | Aztreonam                              | 0.12                     | 32                | ≤0.015 – 64  | 73.7                       |
|                                                   | Piperacillin-tazobactam                | 4                        | 64                | 0.5 – >128   | 77.9                       |
|                                                   | Doripenem                              | 0.06                     | 0.12              | 0.015 – 0.5  | 100                        |
|                                                   | Imipenem                               | 0.5                      | 2                 | 0.06 – 4     | 85.3                       |
|                                                   | Meropenem                              | 0.06                     | 0.12              | 0.008 – 0.25 | 100                        |
|                                                   | Amikacin                               | 1                        | 2                 | ≤0.25 – 8    | 100                        |



| Phenotype/Organism (no. of isolates) <sup>a</sup> | Antimicrobial agent            | MIC (µg/ml) <sup>b</sup> |                       |                | % Susceptible <sup>c</sup> |            |     |
|---------------------------------------------------|--------------------------------|--------------------------|-----------------------|----------------|----------------------------|------------|-----|
|                                                   |                                | MIC <sub>50</sub>        | MIC <sub>90</sub>     | Range          |                            |            |     |
| Colistin-resistant (4)                            | Colistin (n=38) <sup>d</sup>   | 1                        | >4                    | 0.25 – >4      | 89.5                       |            |     |
|                                                   | Tigecycline                    | 0.5                      | 1                     | 0.25 – 4       | 97.9                       |            |     |
|                                                   | Levofloxacin                   | 0.06                     | 1                     | ≤0.03 – >4     | 92.6                       |            |     |
| Ceftazidime-nonsusceptible (25)                   | Ceftazidime-avibactam          | 0.5                      | 1                     | 0.12 – 1       | 100                        |            |     |
|                                                   | Ceftazidime                    | 64                       | 128                   | 8 – >128       | 0                          |            |     |
|                                                   | Cefepime                       | 0.25                     | 8                     | ≤0.12 – >16    | 72.0                       |            |     |
|                                                   | Aztreonam                      | 32                       | 64                    | 2 – 64         | 4.0                        |            |     |
|                                                   | Piperacillin-tazobactam        | 64                       | >128                  | 8 – >128       | 16.0                       |            |     |
|                                                   | Doripenem                      | 0.12                     | 0.25                  | 0.03 – 0.5     | 100                        |            |     |
|                                                   | Imipenem                       | 0.5                      | 2                     | 0.06 – 2       | 84.0                       |            |     |
|                                                   | Meropenem                      | 0.12                     | 0.25                  | 0.03 – 0.25    | 100                        |            |     |
|                                                   | Amikacin                       | 1                        | 2                     | 0.5 – 8        | 100                        |            |     |
|                                                   | Colistin (n=5) <sup>d</sup>    | — <sup>b</sup>           | —                     | 0.5 – 1        | 100                        |            |     |
|                                                   | Tigecycline                    | 0.5                      | 2                     | 0.25 – 4       | 96.0                       |            |     |
|                                                   | Levofloxacin                   | 0.12                     | 4                     | ≤0.03 – >4     | 88.0                       |            |     |
| Colistin-resistant (4)                            | Ceftazidime-avibactam          | — <sup>b</sup>           | —                     | 0.12 – 0.5     | 100                        |            |     |
|                                                   | Ceftazidime                    | —                        | —                     | 0.12 – 4       | 100                        |            |     |
|                                                   | Cefepime                       | —                        | —                     | ≤0.12 – 16     | 75.0                       |            |     |
|                                                   | Aztreonam                      | —                        | —                     | 0.06 – 16      | 75.0                       |            |     |
|                                                   | Piperacillin-tazobactam        | —                        | —                     | 0.5 – 16       | 100                        |            |     |
|                                                   | Doripenem                      | —                        | —                     | 0.06 – 0.25    | 100                        |            |     |
|                                                   | Imipenem                       | —                        | —                     | 0.5 – 4        | 50.0                       |            |     |
|                                                   | Meropenem                      | —                        | —                     | 0.06 – 0.25    | 100                        |            |     |
|                                                   | Amikacin                       | —                        | —                     | 1 – 2          | 100                        |            |     |
|                                                   | Colistin (n=4) <sup>d</sup>    | —                        | —                     | >4 – >4        | 0                          |            |     |
|                                                   | Tigecycline                    | —                        | —                     | 0.5 – 2        | 100                        |            |     |
|                                                   | Levofloxacin                   | —                        | —                     | ≤0.03 – 4      | 50.0                       |            |     |
|                                                   | Multidrug-resistant (3)        | Ceftazidime-avibactam    | — <sup>b</sup>        | —              | 0.25 – 0.5                 | 100        |     |
| Ceftazidime                                       |                                | —                        | —                     | 4 – 128        | 33.3                       |            |     |
| Cefepime                                          |                                | —                        | —                     | 4 – 16         | 0                          |            |     |
| Aztreonam                                         |                                | —                        | —                     | 16 – 64        | 0                          |            |     |
| Piperacillin-tazobactam                           |                                | —                        | —                     | 16 – 128       | 33.3                       |            |     |
| Doripenem                                         |                                | —                        | —                     | 0.03 – 0.06    | 100                        |            |     |
| Imipenem                                          |                                | —                        | —                     | 0.25 – 0.5     | 100                        |            |     |
| Meropenem                                         |                                | —                        | —                     | 0.03 – 0.12    | 100                        |            |     |
| Amikacin                                          |                                | —                        | —                     | 1 – 2          | 100                        |            |     |
| Colistin (n=1) <sup>d</sup>                       |                                | —                        | —                     | >4             | 0                          |            |     |
| Tigecycline                                       |                                | —                        | —                     | 0.5 – 2        | 100                        |            |     |
| Levofloxacin                                      |                                | —                        | —                     | 4 – >4         | 0                          |            |     |
| <i>Citrobacter</i> spp. <sup>e</sup>              |                                | All (51) <sup>h</sup>    | Ceftazidime-avibactam | 0.12           | 0.25                       | ≤0.015 – 1 | 100 |
|                                                   | Ceftazidime                    |                          | 0.25                  | 1              | 0.06 – >128                | 92.2       |     |
|                                                   | Cefepime                       |                          | ≤0.12                 | 0.25           | ≤0.12 – 16                 | 98.0       |     |
|                                                   | Aztreonam                      |                          | 0.12                  | 4              | 0.03 – 128                 | 90.2       |     |
|                                                   | Piperacillin-tazobactam        |                          | 2                     | 16             | 0.5 – 64                   | 92.2       |     |
|                                                   | Doripenem                      |                          | 0.03                  | 0.06           | 0.015 – 0.12               | 100        |     |
|                                                   | Imipenem                       |                          | 0.25                  | 1              | 0.06 – 2                   | 96.1       |     |
|                                                   | Meropenem                      |                          | 0.03                  | 0.06           | 0.015 – 0.12               | 100        |     |
|                                                   | Amikacin                       |                          | 1                     | 2              | ≤0.25 – 4                  | 100        |     |
|                                                   | Colistin (n=20) <sup>d</sup>   |                          | 0.5                   | 1              | ≤0.12 – 1                  | 100        |     |
|                                                   | Tigecycline                    |                          | 0.25                  | 1              | 0.12 – 2                   | 100        |     |
|                                                   | Levofloxacin                   |                          | 0.06                  | 1              | ≤0.03 – >4                 | 98.0       |     |
|                                                   | Ceftazidime-nonsusceptible (4) |                          | Ceftazidime-avibactam | — <sup>b</sup> | —                          | 0.25 – 1   | 100 |
|                                                   |                                |                          | Ceftazidime           | —              | —                          | 32 – >128  | 0   |
| Cefepime                                          |                                | —                        | —                     | 0.25 – 2       | 100                        |            |     |
| Aztreonam                                         |                                | —                        | —                     | 16 – 128       | 0                          |            |     |
| Piperacillin-tazobactam                           |                                | —                        | —                     | 32 – 64        | 0                          |            |     |
| Doripenem                                         |                                | —                        | —                     | 0.06 – 0.12    | 100                        |            |     |
| Imipenem                                          | —                              | —                        | 0.5 – 1               | 100            |                            |            |     |

| Phenotype/Organism (no. of isolates) <sup>a</sup> | Antimicrobial agent          | MIC (µg/ml) <sup>b</sup> |                   |               | % Susceptible <sup>c</sup> |
|---------------------------------------------------|------------------------------|--------------------------|-------------------|---------------|----------------------------|
|                                                   |                              | MIC <sub>50</sub>        | MIC <sub>90</sub> | Range         |                            |
|                                                   | Meropenem                    | —                        | —                 | 0.06 – 0.12   | 100                        |
|                                                   | Amikacin                     | —                        | —                 | 2 – 4         | 100                        |
|                                                   | Colistin (n=2) <sup>d</sup>  | —                        | —                 | 0.5 – 1       | 100                        |
|                                                   | Tigecycline                  | —                        | —                 | 0.25 – 2      | 100                        |
|                                                   | Levofloxacin                 | —                        | —                 | 0.25 – 2      | 100                        |
| <hr/>                                             |                              |                          |                   |               |                            |
| Proteaceae <sup>e</sup>                           |                              |                          |                   |               |                            |
| All (114) <sup>i</sup>                            | Ceftazidime–avibactam        | 0.03                     | 0.06              | ≤0.015 – 0.25 | 100                        |
|                                                   | Ceftazidime                  | 0.06                     | 0.25              | 0.03 – 8      | 99.1                       |
|                                                   | Cefepime                     | ≤0.12                    | 0.25              | ≤0.12 – >16   | 99.1                       |
|                                                   | Aztreonam                    | ≤0.015                   | 0.06              | ≤0.015 – 16   | 98.3                       |
|                                                   | Piperacillin–tazobactam      | 0.5                      | 0.5               | ≤0.25 – 2     | 100                        |
|                                                   | Doripenem                    | 0.25                     | 0.5               | 0.06 – 2      | 98.3                       |
|                                                   | Imipenem                     | 2                        | 4                 | 0.25 – 4      | 27.2                       |
|                                                   | Meropenem                    | 0.12                     | 0.12              | 0.03 – 0.25   | 100                        |
|                                                   | Amikacin                     | 2                        | 8                 | 0.5 – 32      | 99.1                       |
|                                                   | Colistin (n=44) <sup>d</sup> | >4                       | >4                | 0.25 – >4     | 2.3                        |
|                                                   | Tigecycline                  | 2                        | 4                 | 0.5 – 8       | 70.2                       |
|                                                   | Levofloxacin                 | 0.06                     | 4                 | ≤0.03 – >4    | 83.3                       |
| <hr/>                                             |                              |                          |                   |               |                            |
| Ceftazidime-nonsusceptible (1)                    | Ceftazidime–avibactam        | — <sup>b</sup>           | —                 | 0.12          | 100                        |
|                                                   | Ceftazidime                  | —                        | —                 | 8             | 0                          |
|                                                   | Cefepime                     | —                        | —                 | ≤0.12         | 100                        |
|                                                   | Aztreonam                    | —                        | —                 | 0.5           | 100                        |
|                                                   | Piperacillin–tazobactam      | —                        | —                 | 0.5           | 100                        |
|                                                   | Doripenem                    | —                        | —                 | 0.25          | 100                        |
|                                                   | Imipenem                     | —                        | —                 | 4             | 0                          |
|                                                   | Meropenem                    | —                        | —                 | 0.06          | 100                        |
|                                                   | Amikacin                     | —                        | —                 | 2             | 100                        |
|                                                   | Tigecycline                  | —                        | —                 | 4             | 0                          |
|                                                   | Levofloxacin                 | —                        | —                 | 4             | 0                          |
| <hr/>                                             |                              |                          |                   |               |                            |
| Multidrug-resistant (2)                           | Ceftazidime–avibactam        | — <sup>b</sup>           | —                 | 0.03 – 0.06   | 100                        |
|                                                   | Ceftazidime                  | —                        | —                 | 0.06 – 0.5    | 100                        |
|                                                   | Cefepime                     | —                        | —                 | ≤0.12 – >16   | 50.0                       |
|                                                   | Aztreonam                    | —                        | —                 | ≤0.015 – 16   | 50.0                       |
|                                                   | Piperacillin–tazobactam      | —                        | —                 | 0.5 – 0.5     | 100                        |
|                                                   | Doripenem                    | —                        | —                 | 0.12 – 0.25   | 100                        |
|                                                   | Imipenem                     | —                        | —                 | 2 – 2         | 0                          |
|                                                   | Meropenem                    | —                        | —                 | 0.06 – 0.06   | 100                        |
|                                                   | Amikacin                     | —                        | —                 | 4 – 32        | 50.0                       |
|                                                   | Colistin (n=1) <sup>d</sup>  | —                        | —                 | >4            | 0                          |
|                                                   | Tigecycline                  | —                        | —                 | 2 – 8         | 50.0                       |
|                                                   | Levofloxacin                 | —                        | —                 | >4 – >4       | 0                          |
| <hr/>                                             |                              |                          |                   |               |                            |
| Other <i>Enterobacteriaceae</i> <sup>e</sup>      |                              |                          |                   |               |                            |
| All (14) <sup>j</sup>                             | Ceftazidime–avibactam        | 0.25                     | 0.5               | 0.03 – 0.5    | 100                        |
|                                                   | Ceftazidime                  | 0.25                     | 0.5               | 0.06 – 1      | 100                        |
|                                                   | Cefepime                     | ≤0.12                    | 0.5               | ≤0.12 – 0.5   | 100                        |
|                                                   | Aztreonam                    | 0.12                     | 1                 | 0.03 – 4      | 100                        |
|                                                   | Piperacillin–tazobactam      | 2                        | 16                | 1 – 32        | 92.9                       |
|                                                   | Doripenem                    | 0.06                     | 0.25              | 0.06 – 0.25   | 100                        |
|                                                   | Imipenem                     | 0.5                      | 2                 | 0.25 – 2      | 78.6                       |
|                                                   | Meropenem                    | 0.06                     | 0.12              | 0.03 – 0.12   | 100                        |
|                                                   | Amikacin                     | 2                        | 4                 | 1 – 8         | 100                        |
|                                                   | Colistin (n=5) <sup>d</sup>  | — <sup>b</sup>           | —                 | 0.5 – >4      | 20.0                       |
|                                                   | Tigecycline                  | 0.5                      | 2                 | 0.25 – 2      | 100                        |
|                                                   | Levofloxacin                 | 0.12                     | 2                 | 0.06 – 2      | 100                        |
| <hr/>                                             |                              |                          |                   |               |                            |
| <i>Pseudomonas aeruginosa</i>                     |                              |                          |                   |               |                            |
| All (174)                                         | Ceftazidime–avibactam        | 2                        | 8                 | 0.25 – >128   | 97.1                       |
|                                                   | Ceftazidime                  | 2                        | 32                | 0.5 – >128    | 84.5                       |
|                                                   | Cefepime                     | 2                        | 16                | 0.25 – >16    | 84.5                       |
|                                                   | Aztreonam                    | 8                        | 32                | 0.12 – 128    | 63.2                       |

| Phenotype/Organism (no. of isolates) <sup>a</sup> | Antimicrobial agent          | MIC (µg/ml) <sup>b</sup> |                   |              | % Susceptible <sup>c</sup> |      |
|---------------------------------------------------|------------------------------|--------------------------|-------------------|--------------|----------------------------|------|
|                                                   |                              | MIC <sub>50</sub>        | MIC <sub>90</sub> | Range        |                            |      |
|                                                   | Piperacillin–tazobactam      | 8                        | 128               | ≤0.25 – >128 | 69.0                       |      |
|                                                   | Doripenem                    | 0.5                      | >4                | 0.06 – >4    | 73.6                       |      |
|                                                   | Imipenem                     | 2                        | >8                | 0.5 – >8     | 62.1                       |      |
|                                                   | Meropenem                    | 0.5                      | >8                | 0.03 – >8    | 73.0                       |      |
|                                                   | Amikacin                     | 4                        | 8                 | 0.5 – >32    | 98.3                       |      |
|                                                   | Colistin (n=99) <sup>d</sup> | 1                        | 2                 | 0.5 – 4      | 97.0                       |      |
|                                                   | Levofloxacin                 | 0.5                      | >4                | ≤0.03 – >4   | 81.6                       |      |
|                                                   | All, MBL–negative (172)      | Ceftazidime–avibactam    | 2                 | 8            | 0.25 – 32                  | 98.3 |
| Ceftazidime                                       |                              | 2                        | 32                | 0.5 – >128   | 85.5                       |      |
| Cefepime                                          |                              | 2                        | 16                | 0.25 – >16   | 85.5                       |      |
| Aztreonam                                         |                              | 8                        | 32                | 0.12 – 128   | 64.0                       |      |
| Piperacillin–tazobactam                           |                              | 8                        | 128               | ≤0.25 – >128 | 69.8                       |      |
| Doripenem                                         |                              | 0.5                      | >4                | 0.06 – >4    | 74.4                       |      |
| Imipenem                                          |                              | 2                        | >8                | 0.5 – >8     | 62.8                       |      |
| Meropenem                                         |                              | 0.5                      | >8                | 0.03 – >8    | 73.8                       |      |
| Amikacin                                          |                              | 4                        | 8                 | 0.5 – >32    | 98.3                       |      |
| Colistin (n=98) <sup>d</sup>                      |                              | 1                        | 2                 | 0.5 – 4      | 96.9                       |      |
| Levofloxacin                                      |                              | 0.5                      | >4                | ≤0.03 – >4   | 82.6                       |      |
| Ceftazidime-nonsusceptible (27)                   |                              | Ceftazidime–avibactam    | 8                 | 32           | 1 – >128                   | 81.5 |
|                                                   |                              | Ceftazidime              | 32                | >128         | 16 – >128                  | 0    |
|                                                   |                              | Cefepime                 | 16                | >16          | 2 – >16                    | 25.9 |
|                                                   | Aztreonam                    | 32                       | 64                | 8 – 128      | 14.8                       |      |
|                                                   | Piperacillin–tazobactam      | >128                     | >128              | 8 – >128     | 14.8                       |      |
|                                                   | Doripenem                    | >4                       | >4                | 0.25 – >4    | 33.3                       |      |
|                                                   | Imipenem                     | >8                       | >8                | 1 – >8       | 25.9                       |      |
|                                                   | Meropenem                    | >8                       | >8                | 0.12 – >8    | 37.0                       |      |
|                                                   | Amikacin                     | 4                        | 8                 | 0.5 – >32    | 96.3                       |      |
|                                                   | Colistin (n=12) <sup>d</sup> | 1                        | 2                 | 0.5 – 2      | 100                        |      |
|                                                   | Levofloxacin                 | 2                        | >4                | 0.25 – >4    | 55.6                       |      |
| Ceftazidime-nonsusceptible, MBL–negative (25)     | Ceftazidime–avibactam        | 8                        | 16                | 1 – 32       | 88.0                       |      |
|                                                   | Ceftazidime                  | 32                       | 64                | 16 – >128    | 0                          |      |
|                                                   | Cefepime                     | 16                       | >16               | 2 – >16      | 28.0                       |      |
|                                                   | Aztreonam                    | 32                       | 64                | 8 – 128      | 16.0                       |      |
|                                                   | Piperacillin–tazobactam      | >128                     | >128              | 8 – >128     | 16.0                       |      |
|                                                   | Doripenem                    | >4                       | >4                | 0.25 – >4    | 36.0                       |      |
|                                                   | Imipenem                     | >8                       | >8                | 1 – >8       | 28.0                       |      |
|                                                   | Meropenem                    | >8                       | >8                | 0.12 – >8    | 40.0                       |      |
|                                                   | Amikacin                     | 4                        | 8                 | 0.5 – >32    | 96.0                       |      |
|                                                   | Colistin (n=11) <sup>d</sup> | 1                        | 2                 | 0.5 – 2      | 100                        |      |
|                                                   | Levofloxacin                 | 1                        | >4                | 0.25 – >4    | 60.0                       |      |
| Meropenem-nonsusceptible (47)                     | Ceftazidime–avibactam        | 4                        | 16                | 1 – >128     | 89.4                       |      |
|                                                   | Ceftazidime                  | 8                        | 64                | 1 – >128     | 63.8                       |      |
|                                                   | Cefepime                     | 8                        | >16               | 1 – >16      | 51.1                       |      |
|                                                   | Aztreonam                    | 32                       | 64                | 1 – 128      | 29.8                       |      |
|                                                   | Piperacillin–tazobactam      | 32                       | >128              | 2 – >128     | 38.3                       |      |
|                                                   | Doripenem                    | >4                       | >4                | 2 – >4       | 6.4                        |      |
|                                                   | Imipenem                     | >8                       | >8                | 4 – >8       | 0                          |      |
|                                                   | Meropenem                    | >8                       | >8                | 4 – >8       | 0                          |      |
|                                                   | Amikacin                     | 4                        | 16                | 1 – >32      | 93.6                       |      |
|                                                   | Colistin (n=21) <sup>d</sup> | 1                        | 2                 | 0.5 – 4      | 95.2                       |      |
|                                                   | Levofloxacin                 | 2                        | >4                | 0.25 – >4    | 59.6                       |      |
| Meropenem-nonsusceptible, MBL–negative (45)       | Ceftazidime–avibactam        | 4                        | 8                 | 1 – 32       | 93.3                       |      |
|                                                   | Ceftazidime                  | 8                        | 64                | 1 – >128     | 66.7                       |      |
|                                                   | Cefepime                     | 8                        | >16               | 1 – >16      | 53.3                       |      |
|                                                   | Aztreonam                    | 32                       | 64                | 1 – 128      | 31.1                       |      |
|                                                   | Piperacillin–tazobactam      | 32                       | >128              | 2 – >128     | 40.0                       |      |
|                                                   | Doripenem                    | >4                       | >4                | 2 – >4       | 6.7                        |      |
|                                                   | Imipenem                     | >8                       | >8                | 4 – >8       | 0                          |      |
|                                                   | Meropenem                    | >8                       | >8                | 4 – >8       | 0                          |      |

| Phenotype/Organism (no. of isolates) <sup>a</sup> | Antimicrobial agent          | MIC (µg/ml) <sup>b</sup> |                   |           | % Susceptible <sup>c</sup> |
|---------------------------------------------------|------------------------------|--------------------------|-------------------|-----------|----------------------------|
|                                                   |                              | MIC <sub>50</sub>        | MIC <sub>90</sub> | Range     |                            |
|                                                   | Amikacin                     | 4                        | 16                | 1 – >32   | 93.3                       |
|                                                   | Colistin (n=20) <sup>d</sup> | 1                        | 2                 | 0.5 – 4   | 95.0                       |
|                                                   | Levofloxacin                 | 2                        | >4                | 0.25 – >4 | 62.2                       |
| Multidrug-resistant (23)                          | Ceftazidime–avibactam        | 8                        | 32                | 2 – >128  | 78.3                       |
|                                                   | Ceftazidime                  | 32                       | >128              | 2 – >128  | 17.4                       |
|                                                   | Cefepime                     | 16                       | >16               | 8 – >16   | 17.4                       |
|                                                   | Aztreonam                    | 32                       | 64                | 8 – 128   | 8.7                        |
|                                                   | Piperacillin–tazobactam      | >128                     | >128              | 16 – >128 | 8.7                        |
|                                                   | Doripenem                    | >4                       | >4                | 0.25 – >4 | 13.0                       |
|                                                   | Imipenem                     | >8                       | >8                | 1 – >8    | 4.4                        |
|                                                   | Meropenem                    | >8                       | >8                | 0.12 – >8 | 13.0                       |
|                                                   | Amikacin                     | 8                        | 16                | 0.5 – >32 | 91.3                       |
|                                                   | Colistin (n=12) <sup>d</sup> | 1                        | 2                 | 0.5 – 2   | 100                        |
|                                                   | Levofloxacin                 | >4                       | >4                | 0.25 – >4 | 30.4                       |
| Multidrug-resistant, MBL-negative (21)            | Ceftazidime–avibactam        | 8                        | 16                | 2 – 32    | 85.7                       |
|                                                   | Ceftazidime                  | 32                       | 64                | 2 – >128  | 19.1                       |
|                                                   | Cefepime                     | 16                       | >16               | 8 – >16   | 19.1                       |
|                                                   | Aztreonam                    | 32                       | 64                | 8 – 128   | 9.5                        |
|                                                   | Piperacillin–tazobactam      | >128                     | >128              | 16 – >128 | 9.5                        |
|                                                   | Doripenem                    | >4                       | >4                | 0.25 – >4 | 14.3                       |
|                                                   | Imipenem                     | >8                       | >8                | 1 – >8    | 4.8                        |
|                                                   | Meropenem                    | >8                       | >8                | 0.12 – >8 | 14.3                       |
|                                                   | Amikacin                     | 4                        | 16                | 0.5 – >32 | 90.5                       |
|                                                   | Colistin (n=11) <sup>d</sup> | 1                        | 2                 | 0.5 – 2   | 100                        |
|                                                   | Levofloxacin                 | >4                       | >4                | 0.25 – >4 | 33.3                       |

<sup>a</sup> MBL-negative, no gene encoding a metallo-β-lactamase was detected by PCR.

<sup>b</sup> —, MIC<sub>50</sub> and MIC<sub>90</sub> were not calculated for n < 10 isolates.

<sup>c</sup> % Susceptibility was determined according to CLSI 2016 breakpoints with the exception of ceftazidime–avibactam and tigecycline, where US FDA breakpoints were applied. Because CLSI colistin breakpoints are not available for the *Enterobacteriaceae*, susceptibility for this organism group was determined using the EUCAST 2016 breakpoints for colistin.

<sup>d</sup> Values are for colistin tested without 0.002% polysorbate-80; isolates collected in 2014–2015 only.

<sup>e</sup> All isolates were MBL-negative.

<sup>f</sup> Excludes isolates of Proteae and *Serratia* spp. that are intrinsically resistant to colistin.

<sup>g</sup> *Enterobacter* spp. includes *Enterobacter aerogenes* (n=39), *Enterobacter asburiae* (n=5), *Enterobacter cloacae* (n=49), *Enterobacter kobei* (n=1), and *Enterobacter ludwigii* (n=1).

<sup>h</sup> *Citrobacter* spp. includes *Citrobacter braakii* (n=1), *Citrobacter farmeri* (n=1), *Citrobacter freundii* (n=28), and *Citrobacter koseri* (n=21).

<sup>i</sup> Proteae includes *Morganella morganii* (n=22), *Proteus mirabilis* (n=48), *Proteus vulgaris* (n=36), *Providencia alcalifaciens* (n=1), *Providencia rettgeri* (n=6), and *Providencia stuartii* (n=1).

<sup>j</sup> Other *Enterobacteriaceae* includes *Raoultella ornithinolytica* (n=1), *Raoultella planticola* (n=2), and *Serratia marcescens* (n=11).

**Supplemental Table S5B.** Japan – *In vitro* activities of ceftazidime–avibactam and comparator antimicrobial agents tested against 177 isolates of  $\beta$ –lactamase–positive *Enterobacteriaceae* (n=116) and *P. aeruginosa* (n=61) collected as part of the INFORM global surveillance program in 2012–2015.

| Organism/Genotype (no. of isolates) <sup>a</sup>     | Antimicrobial agent                            | MIC ( $\mu\text{g/ml}$ ) <sup>b</sup> |                   |                           | % Susceptible <sup>c</sup> |
|------------------------------------------------------|------------------------------------------------|---------------------------------------|-------------------|---------------------------|----------------------------|
|                                                      |                                                | MIC <sub>50</sub>                     | MIC <sub>90</sub> | Range                     |                            |
| <i>Enterobacteriaceae</i> (116)<br>OSBL–positive (5) | Ceftazidime–avibactam                          | — <sup>b</sup>                        | —                 | 0.03 – 0.25               | 100                        |
|                                                      | Ceftazidime                                    | —                                     | —                 | 0.06 – 0.25               | 100                        |
|                                                      | Cefepime                                       | —                                     | —                 | $\leq 0.12$ – $\leq 0.12$ | 100                        |
|                                                      | Aztreonam                                      | —                                     | —                 | 0.06 – 0.12               | 100                        |
|                                                      | Piperacillin–tazobactam                        | —                                     | —                 | 0.5 – 16                  | 100                        |
|                                                      | Doripenem                                      | —                                     | —                 | 0.12 – 0.25               | 100                        |
|                                                      | Imipenem                                       | —                                     | —                 | 2 – 4                     | 0                          |
|                                                      | Meropenem                                      | —                                     | —                 | 0.03 – 0.25               | 100                        |
|                                                      | Amikacin                                       | —                                     | —                 | 1 – 2                     | 100                        |
|                                                      | Colistin (n=3) <sup>d</sup>                    | —                                     | —                 | 0.5 – 1                   | 100                        |
|                                                      | Tigecycline                                    | —                                     | —                 | 0.5 – 1                   | 100                        |
|                                                      | Levofloxacin                                   | —                                     | —                 | 0.06 – 0.25               | 100                        |
|                                                      | ESBL–positive (78) <sup>e</sup>                | Ceftazidime–avibactam                 | 0.12              | 0.5                       | $\leq 0.015$ – 8           |
| Ceftazidime                                          |                                                | 4                                     | 64                | 0.25 – $>128$             | 53.8                       |
| Cefepime                                             |                                                | 16                                    | $>16$             | $\leq 0.12$ – $>16$       | 14.1                       |
| Aztreonam                                            |                                                | 16                                    | 128               | 1 – $>128$                | 15.4                       |
| Piperacillin–tazobactam                              |                                                | 4                                     | $>128$            | 0.5 – $>128$              | 85.9                       |
| Doripenem                                            |                                                | 0.03                                  | 0.12              | 0.015 – 0.5               | 100                        |
| Imipenem                                             |                                                | 0.25                                  | 0.5               | 0.06 – 8                  | 96.2                       |
| Meropenem                                            |                                                | 0.03                                  | 0.06              | 0.015 – 0.25              | 100                        |
| Amikacin                                             |                                                | 2                                     | 8                 | 0.5 – 32                  | 98.7                       |
| Colistin (n=31) <sup>d</sup>                         |                                                | 0.5                                   | 0.5               | 0.25 – 1                  | 100                        |
| Tigecycline                                          |                                                | 0.25                                  | 1                 | 0.12 – 4                  | 97.4                       |
| Levofloxacin                                         |                                                | $>4$                                  | $>4$              | $\leq 0.03$ – $>4$        | 28.2                       |
| AmpC–positive (29) <sup>f</sup>                      |                                                | Ceftazidime–avibactam                 | 0.25              | 0.5                       | $\leq 0.015$ – 1           |
|                                                      | Ceftazidime                                    | 32                                    | 128               | 0.12 – $>128$             | 34.5                       |
|                                                      | Cefepime                                       | 0.25                                  | 4                 | $\leq 0.12$ – 8           | 79.3                       |
|                                                      | Aztreonam                                      | 8                                     | 64                | 0.06 – 64                 | 44.8                       |
|                                                      | Piperacillin–tazobactam                        | 16                                    | 128               | 0.5 – $>128$              | 51.7                       |
|                                                      | Doripenem                                      | 0.06                                  | 0.25              | 0.03 – 0.5                | 100                        |
|                                                      | Imipenem                                       | 1                                     | 2                 | 0.12 – 4                  | 51.7                       |
|                                                      | Meropenem                                      | 0.12                                  | 0.25              | 0.03 – 0.25               | 100                        |
|                                                      | Amikacin                                       | 2                                     | 4                 | $\leq 0.25$ – 8           | 100                        |
|                                                      | Colistin (n=12) <sup>d</sup>                   | 0.5                                   | $>4$              | 0.5 – $>4$                | 75.0                       |
|                                                      | Tigecycline                                    | 0.5                                   | 2                 | 0.12 – 4                  | 96.6                       |
|                                                      | Levofloxacin                                   | 0.12                                  | $>4$              | $\leq 0.03$ – $>4$        | 82.8                       |
|                                                      | ESBL–positive + AmpC–positive (1) <sup>g</sup> | Ceftazidime–avibactam                 | — <sup>b</sup>    | —                         | 0.25                       |
| Ceftazidime                                          |                                                | —                                     | —                 | 128                       | 0                          |
| Cefepime                                             |                                                | —                                     | —                 | 8                         | 0                          |
| Aztreonam                                            |                                                | —                                     | —                 | 16                        | 0                          |
| Piperacillin–tazobactam                              |                                                | —                                     | —                 | 64                        | 0                          |
| Doripenem                                            |                                                | —                                     | —                 | 0.12                      | 100                        |
| Imipenem                                             |                                                | —                                     | —                 | 1                         | 100                        |
| Meropenem                                            |                                                | —                                     | —                 | 0.12                      | 100                        |
| Amikacin                                             |                                                | —                                     | —                 | 1                         | 100                        |
| Colistin (n=0) <sup>d</sup>                          |                                                | —                                     | —                 | ND <sup>h</sup>           | ND                         |
| Tigecycline                                          |                                                | —                                     | —                 | 0.5                       | 100                        |
| Levofloxacin                                         |                                                | —                                     | —                 | 0.5                       | 100                        |
| KPC–positive (1) <sup>i</sup>                        |                                                | Ceftazidime–avibactam                 | — <sup>b</sup>    | —                         | 0.06                       |
|                                                      | Ceftazidime                                    | —                                     | —                 | 0.12                      | 100                        |

| Organism/Genotype (no. of isolates) <sup>a</sup>          | Antimicrobial agent          | MIC ( $\mu\text{g/ml}$ ) <sup>b</sup> |                   |                 | % Susceptible <sup>c</sup> |
|-----------------------------------------------------------|------------------------------|---------------------------------------|-------------------|-----------------|----------------------------|
|                                                           |                              | MIC <sub>50</sub>                     | MIC <sub>90</sub> | Range           |                            |
|                                                           | Cefepime                     | —                                     | —                 | ≤0.12           | 100                        |
|                                                           | Aztreonam                    | —                                     | —                 | 0.06            | 100                        |
|                                                           | Piperacillin–tazobactam      | —                                     | —                 | 0.5             | 100                        |
|                                                           | Doripenem                    | —                                     | —                 | 0.06            | 100                        |
|                                                           | Imipenem                     | —                                     | —                 | 2               | 0                          |
|                                                           | Meropenem                    | —                                     | —                 | 0.06            | 100                        |
|                                                           | Amikacin                     | —                                     | —                 | 1               | 100                        |
|                                                           | Colistin (n=0) <sup>d</sup>  | —                                     | —                 | ND <sup>h</sup> | ND                         |
|                                                           | Tigecycline                  | —                                     | —                 | 1               | 100                        |
|                                                           | Levofloxacin                 | —                                     | —                 | 0.12            | 100                        |
| MBL–positive (2) <sup>j</sup>                             | Ceftazidime–avibactam        | — <sup>b</sup>                        | —                 | 32 – 64         | 0                          |
|                                                           | Ceftazidime                  | —                                     | —                 | 128 – 128       | 0                          |
|                                                           | Cefepime                     | —                                     | —                 | 8 – 8           | 0                          |
|                                                           | Aztreonam                    | —                                     | —                 | 0.06 – 8        | 50.0                       |
|                                                           | Piperacillin–tazobactam      | —                                     | —                 | 8 – 8           | 100                        |
|                                                           | Doripenem                    | —                                     | —                 | 2 – >4          | 0                          |
|                                                           | Imipenem                     | —                                     | —                 | 2 – 4           | 0                          |
|                                                           | Meropenem                    | —                                     | —                 | 2 – 4           | 0                          |
|                                                           | Amikacin                     | —                                     | —                 | 2 – 4           | 100                        |
|                                                           | Colistin (n=1) <sup>d</sup>  | —                                     | —                 | 1               | 100                        |
|                                                           | Tigecycline                  | —                                     | —                 | 0.5 – 0.5       | 100                        |
|                                                           | Levofloxacin                 | —                                     | —                 | 4 – 4           | 0                          |
| <i>P. aeruginosa</i> (61)                                 | Ceftazidime–avibactam        | — <sup>b</sup>                        | —                 | 32              | 0                          |
| OSBL–positive (1) <sup>k</sup>                            | Ceftazidime                  | —                                     | —                 | >128            | 0                          |
|                                                           | Cefepime                     | —                                     | —                 | >16             | 0                          |
|                                                           | Aztreonam                    | —                                     | —                 | 128             | 0                          |
|                                                           | Piperacillin–tazobactam      | —                                     | —                 | >128            | 0                          |
|                                                           | Doripenem                    | —                                     | —                 | >4              | 0                          |
|                                                           | Imipenem                     | —                                     | —                 | >8              | 0                          |
|                                                           | Meropenem                    | —                                     | —                 | >8              | 0                          |
|                                                           | Amikacin                     | —                                     | —                 | >32             | 0                          |
|                                                           | Colistin (n=1) <sup>d</sup>  | —                                     | —                 | 1               | 100                        |
|                                                           | Levofloxacin                 | —                                     | —                 | >4              | 0                          |
| MBL–positive (2) <sup>k,l</sup>                           | Ceftazidime–avibactam        | — <sup>b</sup>                        | —                 | >128 – >128     | 0                          |
|                                                           | Ceftazidime                  | —                                     | —                 | >128 – >128     | 0                          |
|                                                           | Cefepime                     | —                                     | —                 | >16 – >16       | 0                          |
|                                                           | Aztreonam                    | —                                     | —                 | 16 – 64         | 0                          |
|                                                           | Piperacillin–tazobactam      | —                                     | —                 | 64 – 128        | 0                          |
|                                                           | Doripenem                    | —                                     | —                 | >4 – >4         | 0                          |
|                                                           | Imipenem                     | —                                     | —                 | 8 – >8          | 0                          |
|                                                           | Meropenem                    | —                                     | —                 | >8 – >8         | 0                          |
|                                                           | Amikacin                     | —                                     | —                 | 8 – 8           | 100                        |
|                                                           | Colistin (n=1) <sup>d</sup>  | —                                     | —                 | 2               | 100                        |
|                                                           | Levofloxacin                 | —                                     | —                 | >4 – >4         | 0                          |
| No acquired $\beta$ –lactamase detected (58) <sup>k</sup> | Ceftazidime–avibactam        | 4                                     | 8                 | 0.5 – 32        | 96.6                       |
|                                                           | Ceftazidime                  | 4                                     | 64                | 1 – 64          | 72.4                       |
|                                                           | Cefepime                     | 8                                     | >16               | 1 – >16         | 63.8                       |
|                                                           | Aztreonam                    | 16                                    | 32                | 1 – 64          | 43.1                       |
|                                                           | Piperacillin–tazobactam      | 16                                    | >128              | 2 – >128        | 50.0                       |
|                                                           | Doripenem                    | 4                                     | >4                | 0.25 – >4       | 25.9                       |
|                                                           | Imipenem                     | >8                                    | >8                | 4 – >8          | 0                          |
|                                                           | Meropenem                    | 8                                     | >8                | 0.25 – >8       | 24.1                       |
|                                                           | Amikacin                     | 4                                     | 8                 | 1 – >32         | 96.6                       |
|                                                           | Colistin (n=27) <sup>d</sup> | 1                                     | 2                 | 0.5 – 4         | 92.6                       |
|                                                           | Levofloxacin                 | 1                                     | >4                | ≤0.03 – >4      | 65.5                       |

<sup>a</sup> OSBL, original–spectrum  $\beta$ –lactamase (e.g. TEM–1, SHV–1, SHV–11); ESBL, extended–spectrum  $\beta$ –lactamase; MBL, metallo– $\beta$ –lactamase.

<sup>b</sup> —, MIC<sub>50</sub> and MIC<sub>90</sub> were not calculated for n < 10 isolates.

<sup>c</sup> % Susceptibility was determined according to CLSI 2016 breakpoints with the exception of ceftazidime–avibactam and tigecycline, where US FDA breakpoints were applied. Because CLSI colistin breakpoints are not available for the *Enterobacteriaceae*, susceptibility for this organism group was determined using the EUCAST 2016 breakpoints for colistin.

<sup>d</sup> Values are for colistin tested without 0.002% polysorbate–80; isolates collected in 2014–2015 only.

<sup>e</sup> Includes isolates carrying CTX–M–2; CTX–M–3; CTX–M–8; CTX–M–9; CTX–M–14; CTX–M–15; CTX–M–24; CTX–M–27; CTX–M–28; CTX–M–55; CTX–M–65; CTX–M–74; SHV–2; SHV–12; CTX–M–15 and CTX–M–79; CTX–M–55 and CTX–M–79; SHV–14 and CTX–M–14; and the chromosomal ESBL common to *K. oxytoca* with or without SHV–type or TEM–type OSBLs.

<sup>f</sup> Includes isolates carrying CMY–2; DHA–1; DHA–type; and the chromosomal AmpC common to *Citrobacter* spp., *Enterobacter* spp., and *Serratia* spp. with or without SHV–OSBLs and/or TEM–OSBLs.

<sup>g</sup> Isolate carrying DHA–1 and SHV–2A.

<sup>h</sup> ND, not determined; MIC range and % susceptible were not calculated for n=0 isolates.

<sup>i</sup> Isolate carrying KPC–2 and the chromosomal AmpC common to *E. asburiae*.

<sup>j</sup> Isolates carrying IMP–1; and IMP–1 and CTX–M–3.

<sup>k</sup> Assumed to carry the chromosomal AmpC common to *P. aeruginosa*.

<sup>l</sup> Isolates carrying IMP–1 and IMP–7.

**Supplemental Table S6A.** Malaysia – *In vitro* activities of ceftazidime–avibactam and comparator antimicrobial agents tested against 651 isolates of *Enterobacteriaceae* and 169 isolates of *P. aeruginosa* collected as part of the INFORM global surveillance program in 2013–2015

| Phenotype/Organism (no. of isolates) <sup>a</sup> | Antimicrobial agent           | MIC (µg/ml) <sup>b</sup> |                   |               | % Susceptible <sup>c</sup> |
|---------------------------------------------------|-------------------------------|--------------------------|-------------------|---------------|----------------------------|
|                                                   |                               | MIC <sub>50</sub>        | MIC <sub>90</sub> | Range         |                            |
| <i>Enterobacteriaceae</i>                         |                               |                          |                   |               |                            |
| All (651)                                         | Ceftazidime–avibactam         | 0.12                     | 0.25              | ≤0.015 – >128 | 99.7                       |
|                                                   | Ceftazidime                   | 0.25                     | 64                | 0.03 – >128   | 76.3                       |
|                                                   | Cefepime                      | ≤0.12                    | >16               | ≤0.12 – >16   | 75.6                       |
|                                                   | Aztreonam                     | 0.12                     | 64                | ≤0.015 – >128 | 74.7                       |
|                                                   | Piperacillin–tazobactam       | 2                        | 32                | ≤0.25 – >128  | 89.6                       |
|                                                   | Doripenem                     | 0.06                     | 0.25              | ≤0.008 – >4   | 99.7                       |
|                                                   | Imipenem                      | 0.25                     | 2                 | 0.06 – >8     | 87.7                       |
|                                                   | Meropenem                     | 0.03                     | 0.12              | ≤0.004 – >8   | 99.5                       |
|                                                   | Amikacin                      | 2                        | 4                 | 0.5 – 32      | 99.5                       |
|                                                   | Colistin (n=389) <sup>d</sup> | 0.5                      | >4                | ≤0.12 – >4    | 81.8                       |
|                                                   | Tigecycline                   | 0.5                      | 2                 | 0.06 – >8     | 95.7                       |
|                                                   | Levofloxacin                  | 0.06                     | >4                | ≤0.03 – >4    | 86.5                       |
| All, MBL–negative (649)                           | Ceftazidime–avibactam         | 0.12                     | 0.25              | ≤0.015 – 4    | 100                        |
|                                                   | Ceftazidime                   | 0.25                     | 64                | 0.03 – >128   | 76.6                       |
|                                                   | Cefepime                      | ≤0.12                    | >16               | ≤0.12 – >16   | 75.8                       |
|                                                   | Aztreonam                     | 0.12                     | 64                | ≤0.015 – >128 | 74.7                       |
|                                                   | Piperacillin–tazobactam       | 2                        | 32                | ≤0.25 – >128  | 89.8                       |
|                                                   | Doripenem                     | 0.06                     | 0.25              | ≤0.008 – 1    | 100                        |
|                                                   | Imipenem                      | 0.25                     | 2                 | 0.06 – 8      | 88.0                       |
|                                                   | Meropenem                     | 0.03                     | 0.12              | ≤0.004 – 2    | 99.9                       |
|                                                   | Amikacin                      | 2                        | 4                 | 0.5 – 32      | 99.5                       |
|                                                   | Colistin (n=387) <sup>d</sup> | 0.5                      | >4                | ≤0.12 – >4    | 81.9                       |
|                                                   | Tigecycline                   | 0.5                      | 2                 | 0.06 – >8     | 95.7                       |
|                                                   | Levofloxacin                  | 0.06                     | >4                | ≤0.03 – >4    | 86.4                       |
| Ceftazidime-nonsusceptible (154)                  | Ceftazidime–avibactam         | 0.25                     | 1                 | ≤0.015 – >128 | 98.7                       |
|                                                   | Ceftazidime                   | 32                       | >128              | 8 – >128      | 0                          |
|                                                   | Cefepime                      | >16                      | >16               | ≤0.12 – >16   | 12.3                       |
|                                                   | Aztreonam                     | 64                       | >128              | ≤0.015 – >128 | 3.9                        |
|                                                   | Piperacillin–tazobactam       | 16                       | >128              | 0.5 – >128    | 63.0                       |
|                                                   | Doripenem                     | 0.06                     | 0.12              | 0.03 – >4     | 98.7                       |
|                                                   | Imipenem                      | 0.25                     | 1                 | 0.12 – >8     | 96.1                       |
|                                                   | Meropenem                     | 0.06                     | 0.12              | 0.015 – >8    | 98.1                       |
|                                                   | Amikacin                      | 2                        | 16                | 0.5 – 32      | 98.7                       |
|                                                   | Colistin (n=98) <sup>d</sup>  | 0.5                      | 2                 | 0.25 – >4     | 90.8                       |
|                                                   | Tigecycline                   | 1                        | 2                 | 0.12 – 8      | 97.4                       |
|                                                   | Levofloxacin                  | 1                        | >4                | ≤0.03 – >4    | 70.8                       |
| Ceftazidime-nonsusceptible, MBL–negative (152)    | Ceftazidime–avibactam         | 0.25                     | 1                 | ≤0.015 – 4    | 100                        |
|                                                   | Ceftazidime                   | 32                       | >128              | 8 – >128      | 0                          |
|                                                   | Cefepime                      | >16                      | >16               | ≤0.12 – >16   | 12.5                       |
|                                                   | Aztreonam                     | 64                       | >128              | 1 – >128      | 3.3                        |
|                                                   | Piperacillin–tazobactam       | 16                       | >128              | 0.5 – >128    | 63.8                       |
|                                                   | Doripenem                     | 0.06                     | 0.12              | 0.03 – 1      | 100                        |
|                                                   | Imipenem                      | 0.25                     | 0.5               | 0.12 – 4      | 97.4                       |
|                                                   | Meropenem                     | 0.06                     | 0.12              | 0.015 – 2     | 99.3                       |
|                                                   | Amikacin                      | 2                        | 8                 | 0.5 – 32      | 98.7                       |
|                                                   | Colistin (n=96) <sup>d</sup>  | 0.5                      | 2                 | 0.25 – >4     | 91.7                       |
|                                                   | Tigecycline                   | 1                        | 2                 | 0.12 – 8      | 97.4                       |
|                                                   | Levofloxacin                  | 1                        | >4                | ≤0.03 – >4    | 70.4                       |
| Meropenem-nonsusceptible (3)                      | Ceftazidime–avibactam         | — <sup>b</sup>           | —                 | 2 – >128      | 33.3                       |



| Phenotype/Organism (no. of isolates) <sup>a</sup> | Antimicrobial agent          | MIC ( $\mu\text{g/ml}$ ) <sup>b</sup> |                   |               | % Susceptible <sup>c</sup> |
|---------------------------------------------------|------------------------------|---------------------------------------|-------------------|---------------|----------------------------|
|                                                   |                              | MIC <sub>50</sub>                     | MIC <sub>90</sub> | Range         |                            |
|                                                   | Ceftazidime                  | —                                     | —                 | 32 – >128     | 0                          |
|                                                   | Cefepime                     | —                                     | —                 | 4 – >16       | 0                          |
|                                                   | Aztreonam                    | —                                     | —                 | ≤0.015 – >128 | 33.3                       |
|                                                   | Piperacillin–tazobactam      | —                                     | —                 | 64 – >128     | 0                          |
|                                                   | Doripenem                    | —                                     | —                 | 1 – >4        | 33.3                       |
|                                                   | Imipenem                     | —                                     | —                 | 0.25 – >8     | 33.3                       |
|                                                   | Meropenem                    | —                                     | —                 | 2 – >8        | 0                          |
|                                                   | Amikacin                     | —                                     | —                 | 2 – 16        | 100                        |
|                                                   | Colistin (n=3) <sup>d</sup>  | —                                     | —                 | 1 – >4        | 33.3                       |
|                                                   | Tigecycline                  | —                                     | —                 | 0.5 – 1       | 100                        |
|                                                   | Levofloxacin                 | —                                     | —                 | 0.12 – >4     | 66.7                       |
| Meropenem-nonsusceptible, MBL–negative (1)        | Ceftazidime–avibactam        | — <sup>b</sup>                        | —                 | 2             | 100                        |
|                                                   | Ceftazidime                  | —                                     | —                 | >128          | 0                          |
|                                                   | Cefepime                     | —                                     | —                 | >16           | 0                          |
|                                                   | Aztreonam                    | —                                     | —                 | >128          | 0                          |
|                                                   | Piperacillin–tazobactam      | —                                     | —                 | >128          | 0                          |
|                                                   | Doripenem                    | —                                     | —                 | 1             | 100                        |
|                                                   | Imipenem                     | —                                     | —                 | 0.25          | 100                        |
|                                                   | Meropenem                    | —                                     | —                 | 2             | 0                          |
|                                                   | Amikacin                     | —                                     | —                 | 16            | 100                        |
|                                                   | Colistin (n=1) <sup>d</sup>  | —                                     | —                 | 4             | 0                          |
|                                                   | Tigecycline                  | —                                     | —                 | 1             | 100                        |
|                                                   | Levofloxacin                 | —                                     | —                 | >4            | 0                          |
| Colistin–resistant (11) <sup>e,f</sup>            | Ceftazidime–avibactam        | 0.12                                  | 2                 | 0.03 – 2      | 100                        |
|                                                   | Ceftazidime                  | 16                                    | >128              | 0.12 – >128   | 45.5                       |
|                                                   | Cefepime                     | 0.5                                   | >16               | ≤0.12 – >16   | 54.6                       |
|                                                   | Aztreonam                    | 32                                    | >128              | 0.06 – >128   | 45.5                       |
|                                                   | Piperacillin–tazobactam      | 4                                     | >128              | 1 – >128      | 72.7                       |
|                                                   | Doripenem                    | 0.06                                  | 0.25              | 0.03 – 1      | 100                        |
|                                                   | Imipenem                     | 0.25                                  | 1                 | 0.25 – 1      | 100                        |
|                                                   | Meropenem                    | 0.03                                  | 0.5               | 0.03 – 2      | 90.9                       |
|                                                   | Amikacin                     | 4                                     | 4                 | 1 – 16        | 100                        |
|                                                   | Colistin (n=11) <sup>d</sup> | 4                                     | >4                | 4 – >4        | 0                          |
|                                                   | Tigecycline                  | 0.5                                   | 1                 | 0.12 – 2      | 100                        |
|                                                   | Levofloxacin                 | 1                                     | >4                | 0.06 – >4     | 63.6                       |
| Multidrug–resistant (59)                          | Ceftazidime–avibactam        | 0.25                                  | 1                 | 0.03 – >128   | 98.3                       |
|                                                   | Ceftazidime                  | 128                                   | >128              | 0.5 – >128    | 3.4                        |
|                                                   | Cefepime                     | >16                                   | >16               | 4 – >16       | 0                          |
|                                                   | Aztreonam                    | 128                                   | >128              | 16 – >128     | 0                          |
|                                                   | Piperacillin–tazobactam      | >128                                  | >128              | 2 – >128      | 28.8                       |
|                                                   | Doripenem                    | 0.06                                  | 0.12              | 0.03 – >4     | 98.3                       |
|                                                   | Imipenem                     | 0.25                                  | 0.5               | 0.12 – >8     | 94.9                       |
|                                                   | Meropenem                    | 0.06                                  | 0.25              | 0.015 – >8    | 96.6                       |
|                                                   | Amikacin                     | 4                                     | 16                | 1 – 32        | 96.6                       |
|                                                   | Colistin (n=37) <sup>d</sup> | 0.5                                   | 4                 | 0.25 – >4     | 83.8                       |
|                                                   | Tigecycline                  | 1                                     | 2                 | 0.12 – 8      | 98.3                       |
|                                                   | Levofloxacin                 | >4                                    | >4                | 0.06 – >4     | 35.6                       |
| Multidrug–resistant, MBL–negative (58)            | Ceftazidime–avibactam        | 0.25                                  | 1                 | 0.03 – 4      | 100                        |
|                                                   | Ceftazidime                  | 128                                   | >128              | 0.5 – >128    | 3.5                        |
|                                                   | Cefepime                     | >16                                   | >16               | 4 – >16       | 0                          |
|                                                   | Aztreonam                    | 128                                   | >128              | 16 – >128     | 0                          |
|                                                   | Piperacillin–tazobactam      | >128                                  | >128              | 2 – >128      | 29.3                       |
|                                                   | Doripenem                    | 0.06                                  | 0.12              | 0.03 – 1      | 100                        |
|                                                   | Imipenem                     | 0.25                                  | 0.5               | 0.12 – 4      | 96.6                       |
|                                                   | Meropenem                    | 0.06                                  | 0.25              | 0.015 – 2     | 98.3                       |
|                                                   | Amikacin                     | 4                                     | 16                | 1 – 32        | 96.6                       |
|                                                   | Colistin (n=36) <sup>d</sup> | 0.5                                   | 4                 | 0.25 – >4     | 83.3                       |
|                                                   | Tigecycline                  | 1                                     | 2                 | 0.12 – 8      | 98.3                       |
|                                                   | Levofloxacin                 | >4                                    | >4                | 0.06 – >4     | 34.5                       |

| Phenotype/Organism (no. of isolates) <sup>a</sup> | Antimicrobial agent             | MIC (µg/ml) <sup>b</sup> |                   |               | % Susceptible <sup>c</sup> |      |
|---------------------------------------------------|---------------------------------|--------------------------|-------------------|---------------|----------------------------|------|
|                                                   |                                 | MIC <sub>50</sub>        | MIC <sub>90</sub> | Range         |                            |      |
| <i>Escherichia coli</i> <sup>f</sup>              |                                 |                          |                   |               |                            |      |
| All (215)                                         | Ceftazidime–avibactam           | 0.06                     | 0.12              | ≤0.015 – 4    | 100                        |      |
|                                                   | Ceftazidime                     | 0.25                     | 16                | 0.03 – >128   | 81.4                       |      |
|                                                   | Cefepime                        | ≤0.12                    | >16               | ≤0.12 – >16   | 79.5                       |      |
|                                                   | Aztreonam                       | 0.12                     | 32                | ≤0.015 – >128 | 78.1                       |      |
|                                                   | Piperacillin–tazobactam         | 2                        | 8                 | ≤0.25 – >128  | 95.8                       |      |
|                                                   | Doripenem                       | 0.03                     | 0.06              | ≤0.008 – 0.12 | 100                        |      |
|                                                   | Imipenem                        | 0.25                     | 0.25              | 0.06 – 2      | 99.5                       |      |
|                                                   | Meropenem                       | 0.03                     | 0.06              | 0.015 – 0.06  | 100                        |      |
|                                                   | Amikacin                        | 2                        | 4                 | 1 – 32        | 99.1                       |      |
|                                                   | Colistin (n=123) <sup>d</sup>   | 0.5                      | 1                 | ≤0.12 – 4     | 95.1                       |      |
|                                                   | Tigecycline                     | 0.25                     | 0.5               | 0.06 – 2      | 100                        |      |
|                                                   | Levofloxacin                    | 0.06                     | >4                | ≤0.03 – >4    | 77.7                       |      |
|                                                   | Ceftazidime-nonsusceptible (40) | Ceftazidime–avibactam    | 0.12              | 0.25          | ≤0.015 – 4                 | 100  |
|                                                   |                                 | Ceftazidime              | 32                | 64            | 8 – >128                   | 0    |
| Cefepime                                          |                                 | >16                      | >16               | ≤0.12 – >16   | 20.0                       |      |
| Aztreonam                                         |                                 | 64                       | 128               | 1 – >128      | 7.5                        |      |
| Piperacillin–tazobactam                           |                                 | 4                        | 16                | 0.5 – >128    | 90.0                       |      |
| Doripenem                                         |                                 | 0.06                     | 0.06              | 0.03 – 0.12   | 100                        |      |
| Imipenem                                          |                                 | 0.25                     | 0.5               | 0.12 – 2      | 97.5                       |      |
| Meropenem                                         |                                 | 0.03                     | 0.06              | 0.015 – 0.06  | 100                        |      |
| Amikacin                                          |                                 | 4                        | 8                 | 1 – 32        | 97.5                       |      |
| Colistin (n=29) <sup>d</sup>                      |                                 | 0.5                      | 4                 | 0.25 – 4      | 89.7                       |      |
| Tigecycline                                       |                                 | 0.25                     | 1                 | 0.12 – 2      | 100                        |      |
| Levofloxacin                                      |                                 | >4                       | >4                | ≤0.03 – >4    | 45.0                       |      |
| Colistin-resistant (6)                            |                                 | Ceftazidime–avibactam    | — <sup>b</sup>    | —             | 0.03 – 0.12                | 100  |
|                                                   |                                 | Ceftazidime              | —                 | —             | 0.12 – 64                  | 50.0 |
|                                                   | Cefepime                        | —                        | —                 | ≤0.12 – >16   | 50.0                       |      |
|                                                   | Aztreonam                       | —                        | —                 | 0.06 – 64     | 50.0                       |      |
|                                                   | Piperacillin–tazobactam         | —                        | —                 | 1 – 4         | 100                        |      |
|                                                   | Doripenem                       | —                        | —                 | 0.03 – 0.06   | 100                        |      |
|                                                   | Imipenem                        | —                        | —                 | 0.25 – 0.25   | 100                        |      |
|                                                   | Meropenem                       | —                        | —                 | 0.03 – 0.03   | 100                        |      |
|                                                   | Amikacin                        | —                        | —                 | 2 – 4         | 100                        |      |
|                                                   | Colistin (n=6) <sup>d</sup>     | —                        | —                 | 4 – 4         | 0                          |      |
|                                                   | Tigecycline                     | —                        | —                 | 0.12 – 1      | 100                        |      |
|                                                   | Levofloxacin                    | —                        | —                 | 1 – >4        | 50.0                       |      |
|                                                   | Multidrug-resistant (17)        | Ceftazidime–avibactam    | 0.12              | 0.25          | 0.03 – 4                   | 100  |
|                                                   |                                 | Ceftazidime              | 32                | 128           | 16 – >128                  | 0    |
| Cefepime                                          |                                 | >16                      | >16               | 4 – >16       | 0                          |      |
| Aztreonam                                         |                                 | 64                       | 128               | 16 – >128     | 0                          |      |
| Piperacillin–tazobactam                           |                                 | 4                        | 128               | 2 – >128      | 82.4                       |      |
| Doripenem                                         |                                 | 0.06                     | 0.06              | 0.03 – 0.12   | 100                        |      |
| Imipenem                                          |                                 | 0.25                     | 1                 | 0.25 – 2      | 94.1                       |      |
| Meropenem                                         |                                 | 0.03                     | 0.06              | 0.03 – 0.06   | 100                        |      |
| Amikacin                                          |                                 | 4                        | 8                 | 2 – 32        | 94.1                       |      |
| Colistin (n=14) <sup>d</sup>                      |                                 | 0.5                      | 4                 | 0.25 – 4      | 85.7                       |      |
| Tigecycline                                       |                                 | 0.25                     | 2                 | 0.12 – 2      | 100                        |      |
| Levofloxacin                                      |                                 | >4                       | >4                | >4 – >4       | 0                          |      |
| <i>Klebsiella pneumoniae</i>                      |                                 |                          |                   |               |                            |      |
| All (241)                                         |                                 | Ceftazidime–avibactam    | 0.12              | 0.5           | ≤0.015 – >128              | 99.6 |
|                                                   | Ceftazidime                     | 0.25                     | 128               | 0.03 – >128   | 59.8                       |      |
|                                                   | Cefepime                        | ≤0.12                    | >16               | ≤0.12 – >16   | 60.2                       |      |
|                                                   | Aztreonam                       | 0.12                     | 128               | ≤0.015 – >128 | 58.9                       |      |
|                                                   | Piperacillin–tazobactam         | 4                        | >128              | 0.5 – >128    | 78.8                       |      |
|                                                   | Doripenem                       | 0.06                     | 0.12              | 0.03 – >4     | 99.6                       |      |
|                                                   | Imipenem                        | 0.25                     | 0.5               | 0.06 – >8     | 99.6                       |      |
|                                                   | Meropenem                       | 0.06                     | 0.06              | 0.015 – >8    | 99.2                       |      |
|                                                   | Amikacin                        | 1                        | 4                 | 0.5 – 32      | 99.6                       |      |
|                                                   | Colistin (n=151) <sup>d</sup>   | 0.5                      | 1                 | 0.25 – 4      | 98.7                       |      |

| Phenotype/Organism (no. of isolates) <sup>a</sup>       | Antimicrobial agent                                        | MIC (μg/ml) <sup>b</sup> |                   |               | % Susceptible <sup>c</sup> |      |
|---------------------------------------------------------|------------------------------------------------------------|--------------------------|-------------------|---------------|----------------------------|------|
|                                                         |                                                            | MIC <sub>50</sub>        | MIC <sub>90</sub> | Range         |                            |      |
| All, MBL <sub>-</sub> negative (240)                    | Tigecycline                                                | 0.5                      | 2                 | 0.25 – >8     | 97.5                       |      |
|                                                         | Levofloxacin                                               | 0.06                     | 4                 | ≤0.03 – >4    | 88.0                       |      |
|                                                         | Ceftazidime–avibactam                                      | 0.12                     | 0.5               | ≤0.015 – 2    | 100                        |      |
|                                                         | Ceftazidime                                                | 0.25                     | 128               | 0.03 – >128   | 60.0                       |      |
|                                                         | Cefepime                                                   | ≤0.12                    | >16               | ≤0.12 – >16   | 60.4                       |      |
|                                                         | Aztreonam                                                  | 0.12                     | 128               | ≤0.015 – >128 | 59.2                       |      |
|                                                         | Piperacillin–tazobactam                                    | 4                        | >128              | 0.5 – >128    | 79.2                       |      |
|                                                         | Doripenem                                                  | 0.06                     | 0.12              | 0.03 – 1      | 100                        |      |
|                                                         | Imipenem                                                   | 0.25                     | 0.5               | 0.06 – 1      | 100                        |      |
|                                                         | Meropenem                                                  | 0.06                     | 0.06              | 0.015 – 2     | 99.6                       |      |
| Amikacin                                                | 1                                                          | 4                        | 0.5 – 32          | 99.6          |                            |      |
| Colistin (n=150) <sup>d</sup>                           | 0.5                                                        | 1                        | 0.25 – 4          | 98.7          |                            |      |
| Tigecycline                                             | 0.5                                                        | 2                        | 0.25 – >8         | 97.5          |                            |      |
| Levofloxacin                                            | 0.06                                                       | 4                        | ≤0.03 – >4        | 87.9          |                            |      |
| Ceftazidime-nonsusceptible (97)                         | Ceftazidime–avibactam                                      | 0.25                     | 1                 | 0.03 – >128   | 99.0                       |      |
|                                                         | Ceftazidime                                                | 32                       | >128              | 8 – >128      | 0                          |      |
|                                                         | Cefepime                                                   | >16                      | >16               | ≤0.12 – >16   | 5.2                        |      |
|                                                         | Aztreonam                                                  | 64                       | >128              | 1 – >128      | 2.1                        |      |
|                                                         | Piperacillin–tazobactam                                    | 16                       | >128              | 0.5 – >128    | 51.6                       |      |
|                                                         | Doripenem                                                  | 0.06                     | 0.12              | 0.03 – >4     | 99.0                       |      |
|                                                         | Imipenem                                                   | 0.25                     | 0.5               | 0.12 – >8     | 99.0                       |      |
|                                                         | Meropenem                                                  | 0.06                     | 0.25              | 0.015 – >8    | 97.9                       |      |
|                                                         | Amikacin                                                   | 2                        | 16                | 0.5 – 32      | 99.0                       |      |
|                                                         | Colistin (n=55) <sup>d</sup>                               | 0.5                      | 1                 | 0.25 – 4      | 96.4                       |      |
|                                                         | Tigecycline                                                | 1                        | 2                 | 0.25 – 8      | 96.9                       |      |
|                                                         | Levofloxacin                                               | 1                        | >4                | ≤0.03 – >4    | 77.3                       |      |
|                                                         | Ceftazidime-nonsusceptible, MBL <sub>-</sub> negative (96) | Ceftazidime–avibactam    | 0.25              | 1             | 0.03 – 2                   | 100  |
|                                                         |                                                            | Ceftazidime              | 32                | >128          | 8 – >128                   | 0    |
| Cefepime                                                |                                                            | >16                      | >16               | ≤0.12 – >16   | 5.2                        |      |
| Aztreonam                                               |                                                            | 64                       | >128              | 1 – >128      | 2.1                        |      |
| Piperacillin–tazobactam                                 |                                                            | 16                       | >128              | 0.5 – >128    | 52.1                       |      |
| Doripenem                                               |                                                            | 0.06                     | 0.12              | 0.03 – 1      | 100                        |      |
| Imipenem                                                |                                                            | 0.25                     | 0.5               | 0.12 – 1      | 100                        |      |
| Meropenem                                               |                                                            | 0.06                     | 0.12              | 0.015 – 2     | 99.0                       |      |
| Amikacin                                                |                                                            | 2                        | 16                | 0.5 – 32      | 99.0                       |      |
| Colistin (n=54) <sup>d</sup>                            |                                                            | 0.5                      | 1                 | 0.25 – 4      | 96.3                       |      |
| Tigecycline                                             |                                                            | 1                        | 2                 | 0.25 – 8      | 96.9                       |      |
| Levofloxacin                                            |                                                            | 1                        | >4                | ≤0.03 – >4    | 77.1                       |      |
| Meropenem-nonsusceptible (2)                            |                                                            | Ceftazidime–avibactam    | — <sup>b</sup>    | —             | 2 – >128                   | 50.0 |
|                                                         |                                                            | Ceftazidime              | —                 | —             | >128 – >128                | 0    |
|                                                         | Cefepime                                                   | —                        | —                 | >16 – >16     | 0                          |      |
|                                                         | Aztreonam                                                  | —                        | —                 | 64 – >128     | 0                          |      |
|                                                         | Piperacillin–tazobactam                                    | —                        | —                 | >128 – >128   | 0                          |      |
|                                                         | Doripenem                                                  | —                        | —                 | 1 – >4        | 50.0                       |      |
|                                                         | Imipenem                                                   | —                        | —                 | 0.25 – >8     | 50.0                       |      |
|                                                         | Meropenem                                                  | —                        | —                 | 2 – >8        | 0                          |      |
|                                                         | Amikacin                                                   | —                        | —                 | 16 – 16       | 100                        |      |
|                                                         | Colistin (n=2) <sup>d</sup>                                | —                        | —                 | 1 – 4         | 50.0                       |      |
|                                                         | Tigecycline                                                | —                        | —                 | 0.5 – 1       | 100                        |      |
|                                                         | Levofloxacin                                               | —                        | —                 | 2 – >4        | 50.0                       |      |
| Meropenem-nonsusceptible, MBL <sub>-</sub> negative (1) | Ceftazidime–avibactam                                      | — <sup>b</sup>           | —                 | 2             | 100                        |      |
|                                                         | Ceftazidime                                                | —                        | —                 | >128          | 0                          |      |
|                                                         | Cefepime                                                   | —                        | —                 | >16           | 0                          |      |
|                                                         | Aztreonam                                                  | —                        | —                 | >128          | 0                          |      |
|                                                         | Piperacillin–tazobactam                                    | —                        | —                 | >128          | 0                          |      |
|                                                         | Doripenem                                                  | —                        | —                 | 1             | 100                        |      |
|                                                         | Imipenem                                                   | —                        | —                 | 0.25          | 100                        |      |
|                                                         | Meropenem                                                  | —                        | —                 | 2             | 0                          |      |
|                                                         | Amikacin                                                   | —                        | —                 | 16            | 100                        |      |

| Phenotype/Organism (no. of isolates) <sup>a</sup> | Antimicrobial agent                    | MIC ( $\mu\text{g/ml}$ ) <sup>b</sup> |                   |               | % Susceptible <sup>c</sup> |     |
|---------------------------------------------------|----------------------------------------|---------------------------------------|-------------------|---------------|----------------------------|-----|
|                                                   |                                        | MIC <sub>50</sub>                     | MIC <sub>90</sub> | Range         |                            |     |
|                                                   | Colistin (n=1) <sup>d</sup>            | —                                     | —                 | 4             | 0                          |     |
|                                                   | Tigecycline                            | —                                     | —                 | 1             | 100                        |     |
|                                                   | Levofloxacin                           | —                                     | —                 | >4            | 0                          |     |
| Colistin-resistant (2) <sup>f</sup>               | Ceftazidime-avibactam                  | — <sup>b</sup>                        | —                 | 1 – 2         | 100                        |     |
|                                                   | Ceftazidime                            | —                                     | —                 | >128 – >128   | 0                          |     |
|                                                   | Cefepime                               | —                                     | —                 | >16 – >16     | 0                          |     |
|                                                   | Aztreonam                              | —                                     | —                 | >128 – >128   | 0                          |     |
|                                                   | Piperacillin-tazobactam                | —                                     | —                 | >128 – >128   | 0                          |     |
|                                                   | Doripenem                              | —                                     | —                 | 0.12 – 1      | 100                        |     |
|                                                   | Imipenem                               | —                                     | —                 | 0.25 – 0.25   | 100                        |     |
|                                                   | Meropenem                              | —                                     | —                 | 0.25 – 2      | 50.0                       |     |
|                                                   | Amikacin                               | —                                     | —                 | 4 – 16        | 100                        |     |
|                                                   | Colistin (n=2) <sup>d</sup>            | —                                     | —                 | 4 – 4         | 0                          |     |
|                                                   | Tigecycline                            | —                                     | —                 | 1 – 2         | 100                        |     |
|                                                   | Levofloxacin                           | —                                     | —                 | 2 – >4        | 50.0                       |     |
| Multidrug-resistant (39)                          | Ceftazidime-avibactam                  | 0.5                                   | 2                 | 0.03 – >128   | 97.4                       |     |
|                                                   | Ceftazidime                            | 128                                   | >128              | 2 – >128      | 2.6                        |     |
|                                                   | Cefepime                               | >16                                   | >16               | 16 – >16      | 0                          |     |
|                                                   | Aztreonam                              | 128                                   | >128              | 32 – >128     | 0                          |     |
|                                                   | Piperacillin-tazobactam                | >128                                  | >128              | 8 – >128      | 7.7                        |     |
|                                                   | Doripenem                              | 0.12                                  | 0.25              | 0.03 – >4     | 97.4                       |     |
|                                                   | Imipenem                               | 0.25                                  | 0.5               | 0.12 – >8     | 97.4                       |     |
|                                                   | Meropenem                              | 0.06                                  | 0.5               | 0.015 – >8    | 94.9                       |     |
|                                                   | Amikacin                               | 4                                     | 16                | 1 – 32        | 97.4                       |     |
|                                                   | Colistin (n=20) <sup>d</sup>           | 0.5                                   | 1                 | 0.25 – 4      | 90.0                       |     |
|                                                   | Tigecycline                            | 2                                     | 2                 | 0.5 – 8       | 97.4                       |     |
|                                                   | Levofloxacin                           | 4                                     | >4                | 0.06 – >4     | 48.7                       |     |
|                                                   | Multidrug-resistant, MBL-negative (38) | Ceftazidime-avibactam                 | 0.5               | 1             | 0.03 – 2                   | 100 |
|                                                   |                                        | Ceftazidime                           | 128               | >128          | 2 – >128                   | 2.6 |
| Cefepime                                          |                                        | >16                                   | >16               | 16 – >16      | 0                          |     |
| Aztreonam                                         |                                        | 128                                   | >128              | 32 – >128     | 0                          |     |
| Piperacillin-tazobactam                           |                                        | >128                                  | >128              | 8 – >128      | 7.9                        |     |
| Doripenem                                         |                                        | 0.12                                  | 0.12              | 0.03 – 1      | 100                        |     |
| Imipenem                                          |                                        | 0.25                                  | 0.5               | 0.12 – 0.5    | 100                        |     |
| Meropenem                                         |                                        | 0.06                                  | 0.5               | 0.015 – 2     | 97.4                       |     |
| Amikacin                                          |                                        | 2                                     | 16                | 1 – 32        | 97.4                       |     |
| Colistin (n=19) <sup>d</sup>                      |                                        | 0.5                                   | 4                 | 0.25 – 4      | 89.5                       |     |
| Tigecycline                                       |                                        | 2                                     | 2                 | 0.5 – 8       | 97.4                       |     |
| Levofloxacin                                      |                                        | 4                                     | >4                | 0.06 – >4     | 47.4                       |     |
| <i>Klebsiella oxytoca</i> <sup>f</sup>            |                                        |                                       |                   |               |                            |     |
| All (4)                                           |                                        | Ceftazidime-avibactam                 | — <sup>b</sup>    | —             | 0.12 – 0.12                | 100 |
|                                                   | Ceftazidime                            | —                                     | —                 | 0.12 – 0.12   | 100                        |     |
|                                                   | Cefepime                               | —                                     | —                 | ≤0.12 – ≤0.12 | 100                        |     |
|                                                   | Aztreonam                              | —                                     | —                 | 0.12 – 0.25   | 100                        |     |
|                                                   | Piperacillin-tazobactam                | —                                     | —                 | 2 – 4         | 100                        |     |
|                                                   | Doripenem                              | —                                     | —                 | 0.03 – 0.12   | 100                        |     |
|                                                   | Imipenem                               | —                                     | —                 | 0.12 – 0.25   | 100                        |     |
|                                                   | Meropenem                              | —                                     | —                 | 0.03 – 0.06   | 100                        |     |
|                                                   | Amikacin                               | —                                     | —                 | 1 – 4         | 100                        |     |
|                                                   | Colistin (n=2) <sup>d</sup>            | —                                     | —                 | 0.5 – 2       | 100                        |     |
|                                                   | Tigecycline                            | —                                     | —                 | 0.25 – 1      | 100                        |     |
|                                                   | Levofloxacin                           | —                                     | —                 | ≤0.03 – 0.06  | 100                        |     |
|                                                   | <i>Enterobacter</i> spp. <sup>f</sup>  |                                       |                   |               |                            |     |
| All (69) <sup>g</sup>                             | Ceftazidime-avibactam                  | 0.12                                  | 0.5               | 0.03 – 2      | 100                        |     |
|                                                   | Ceftazidime                            | 0.25                                  | 32                | 0.12 – 128    | 88.4                       |     |
|                                                   | Cefepime                               | ≤0.12                                 | 4                 | ≤0.12 – >16   | 88.4                       |     |
|                                                   | Aztreonam                              | 0.12                                  | 32                | 0.03 – 128    | 87.0                       |     |
|                                                   | Piperacillin-tazobactam                | 4                                     | 16                | 0.5 – 64      | 97.1                       |     |
|                                                   | Doripenem                              | 0.06                                  | 0.12              | 0.03 – 0.25   | 100                        |     |

| Phenotype/Organism (no. of isolates) <sup>a</sup> | Antimicrobial agent          | MIC ( $\mu\text{g/ml}$ ) <sup>b</sup> |                   |                     | % Susceptible <sup>c</sup> |
|---------------------------------------------------|------------------------------|---------------------------------------|-------------------|---------------------|----------------------------|
|                                                   |                              | MIC <sub>50</sub>                     | MIC <sub>90</sub> | Range               |                            |
|                                                   | Imipenem                     | 1                                     | 2                 | 0.06 – 4            | 85.5                       |
|                                                   | Meropenem                    | 0.06                                  | 0.06              | 0.015 – 0.5         | 100                        |
|                                                   | Amikacin                     | 1                                     | 2                 | 0.5 – 4             | 100                        |
|                                                   | Colistin (n=40) <sup>d</sup> | 0.5                                   | 1                 | $\leq 0.12$ – $>4$  | 92.5                       |
|                                                   | Tigecycline                  | 0.5                                   | 1                 | 0.12 – 2            | 100                        |
|                                                   | Levofloxacin                 | 0.06                                  | 0.12              | $\leq 0.03$ – 1     | 100                        |
| Ceftazidime-nonsusceptible (8)                    | Ceftazidime-avibactam        | — <sup>b</sup>                        | —                 | 0.12 – 2            | 100                        |
|                                                   | Ceftazidime                  | —                                     | —                 | 32 – 128            | 0                          |
|                                                   | Cefepime                     | —                                     | —                 | 0.25 – $>16$        | 50.0                       |
|                                                   | Aztreonam                    | —                                     | —                 | 32 – 128            | 0                          |
|                                                   | Piperacillin-tazobactam      | —                                     | —                 | 8 – 64              | 75.0                       |
|                                                   | Doripenem                    | —                                     | —                 | 0.03 – 0.25         | 100                        |
|                                                   | Imipenem                     | —                                     | —                 | 0.5 – 2             | 87.5                       |
|                                                   | Meropenem                    | —                                     | —                 | 0.03 – 0.5          | 100                        |
|                                                   | Amikacin                     | —                                     | —                 | 1 – 4               | 100                        |
|                                                   | Colistin (n=7) <sup>d</sup>  | —                                     | —                 | 0.25 – $>4$         | 85.7                       |
|                                                   | Tigecycline                  | —                                     | —                 | 0.5 – 1             | 100                        |
|                                                   | Levofloxacin                 | —                                     | —                 | 0.06 – 1            | 100                        |
| Colistin-resistant (3)                            | Ceftazidime-avibactam        | — <sup>b</sup>                        | —                 | 0.12 – 2            | 100                        |
|                                                   | Ceftazidime                  | —                                     | —                 | 0.25 – 128          | 66.7                       |
|                                                   | Cefepime                     | —                                     | —                 | $\leq 0.12$ – 0.5   | 100                        |
|                                                   | Aztreonam                    | —                                     | —                 | 0.12 – 64           | 66.7                       |
|                                                   | Piperacillin-tazobactam      | —                                     | —                 | 4 – 32              | 66.7                       |
|                                                   | Doripenem                    | —                                     | —                 | 0.03 – 0.25         | 100                        |
|                                                   | Imipenem                     | —                                     | —                 | 1 – 1               | 100                        |
|                                                   | Meropenem                    | —                                     | —                 | 0.03 – 0.5          | 100                        |
|                                                   | Amikacin                     | —                                     | —                 | 1 – 2               | 100                        |
|                                                   | Colistin (n=3) <sup>d</sup>  | —                                     | —                 | $>4$ – $>4$         | 0                          |
|                                                   | Tigecycline                  | —                                     | —                 | 0.5 – 0.5           | 100                        |
|                                                   | Levofloxacin                 | —                                     | —                 | 0.06 – 0.25         | 100                        |
| <i>Citrobacter</i> spp. <sup>f</sup>              |                              |                                       |                   |                     |                            |
| All (25) <sup>h</sup>                             | Ceftazidime-avibactam        | 0.12                                  | 0.25              | 0.06 – 0.5          | 100                        |
|                                                   | Ceftazidime                  | 0.25                                  | 64                | 0.12 – 128          | 76.0                       |
|                                                   | Cefepime                     | $\leq 0.12$                           | $>16$             | $\leq 0.12$ – $>16$ | 84.0                       |
|                                                   | Aztreonam                    | 0.12                                  | 64                | 0.03 – 128          | 76.0                       |
|                                                   | Piperacillin-tazobactam      | 4                                     | 128               | 1 – $>128$          | 88.0                       |
|                                                   | Doripenem                    | 0.03                                  | 0.06              | 0.03 – 0.06         | 100                        |
|                                                   | Imipenem                     | 0.25                                  | 0.5               | 0.12 – 2            | 96.0                       |
|                                                   | Meropenem                    | 0.03                                  | 0.06              | 0.015 – 0.06        | 100                        |
|                                                   | Amikacin                     | 2                                     | 4                 | 1 – 8               | 100                        |
|                                                   | Colistin (n=13) <sup>d</sup> | 0.5                                   | 1                 | 0.25 – 1            | 100                        |
|                                                   | Tigecycline                  | 0.25                                  | 0.5               | 0.12 – 1            | 100                        |
|                                                   | Levofloxacin                 | 0.03                                  | 1                 | $\leq 0.03$ – 2     | 100                        |
| Ceftazidime-nonsusceptible (6)                    | Ceftazidime-avibactam        | — <sup>b</sup>                        | —                 | 0.12 – 0.5          | 100                        |
|                                                   | Ceftazidime                  | —                                     | —                 | 32 – 128            | 0                          |
|                                                   | Cefepime                     | —                                     | —                 | 0.25 – $>16$        | 33.3                       |
|                                                   | Aztreonam                    | —                                     | —                 | 8 – 128             | 0                          |
|                                                   | Piperacillin-tazobactam      | —                                     | —                 | 4 – $>128$          | 66.7                       |
|                                                   | Doripenem                    | —                                     | —                 | 0.03 – 0.06         | 100                        |
|                                                   | Imipenem                     | —                                     | —                 | 0.12 – 2            | 83.3                       |
|                                                   | Meropenem                    | —                                     | —                 | 0.03 – 0.06         | 100                        |
|                                                   | Amikacin                     | —                                     | —                 | 1 – 8               | 100                        |
|                                                   | Colistin (n=4) <sup>d</sup>  | —                                     | —                 | 0.25 – 1            | 100                        |
|                                                   | Tigecycline                  | —                                     | —                 | 0.12 – 0.5          | 100                        |
|                                                   | Levofloxacin                 | —                                     | —                 | $\leq 0.03$ – 2     | 100                        |
| Multidrug-resistant (1)                           | Ceftazidime-avibactam        | — <sup>b</sup>                        | —                 | 0.25                | 100                        |
|                                                   | Ceftazidime                  | —                                     | —                 | 128                 | 0                          |
|                                                   | Cefepime                     | —                                     | —                 | $>16$               | 0                          |
|                                                   | Aztreonam                    | —                                     | —                 | 128                 | 0                          |

| Phenotype/Organism (no. of isolates) <sup>a</sup> | Antimicrobial agent          | MIC (μg/ml) <sup>b</sup> |                   |              | % Susceptible <sup>c</sup> |
|---------------------------------------------------|------------------------------|--------------------------|-------------------|--------------|----------------------------|
|                                                   |                              | MIC <sub>50</sub>        | MIC <sub>90</sub> | Range        |                            |
|                                                   | Piperacillin–tazobactam      | —                        | —                 | >128         | 0                          |
|                                                   | Doripenem                    | —                        | —                 | 0.03         | 100                        |
|                                                   | Imipenem                     | —                        | —                 | 0.12         | 100                        |
|                                                   | Meropenem                    | —                        | —                 | 0.03         | 100                        |
|                                                   | Amikacin                     | —                        | —                 | 8            | 100                        |
|                                                   | Colistin (n=1) <sup>d</sup>  | —                        | —                 | 0.25         | 100                        |
|                                                   | Tigecycline                  | —                        | —                 | 0.5          | 100                        |
|                                                   | Levofloxacin                 | —                        | —                 | 1            | 100                        |
| <hr/>                                             |                              |                          |                   |              |                            |
| Proteaceae                                        |                              |                          |                   |              |                            |
| All (79) <sup>i</sup>                             | Ceftazidime–avibactam        | 0.03                     | 0.12              | 0.03 – 32    | 98.7                       |
|                                                   | Ceftazidime                  | 0.06                     | 0.25              | 0.03 – 32    | 97.5                       |
|                                                   | Cefepime                     | ≤0.12                    | 0.25              | ≤0.12 – >16  | 92.4                       |
|                                                   | Aztreonam                    | ≤0.015                   | 0.06              | ≤0.015 – 64  | 96.2                       |
|                                                   | Piperacillin–tazobactam      | 0.5                      | 2                 | ≤0.25 – 128  | 97.5                       |
|                                                   | Doripenem                    | 0.25                     | 0.5               | 0.06 – >4    | 98.7                       |
|                                                   | Imipenem                     | 2                        | 4                 | 0.25 – >8    | 16.5                       |
|                                                   | Meropenem                    | 0.12                     | 0.12              | ≤0.004 – >8  | 98.7                       |
|                                                   | Amikacin                     | 4                        | 8                 | 0.5 – 16     | 100                        |
|                                                   | Colistin (n=48) <sup>d</sup> | >4                       | >4                | 4 – >4       | 0                          |
|                                                   | Tigecycline                  | 2                        | 4                 | 0.5 – >8     | 73.4                       |
|                                                   | Levofloxacin                 | 0.12                     | 4                 | ≤0.03 – >4   | 86.1                       |
| All, MBL–negative (78)                            | Ceftazidime–avibactam        | 0.03                     | 0.06              | 0.03 – 0.25  | 100                        |
|                                                   | Ceftazidime                  | 0.06                     | 0.25              | 0.03 – 8     | 98.7                       |
|                                                   | Cefepime                     | ≤0.12                    | 0.25              | ≤0.12 – >16  | 93.6                       |
|                                                   | Aztreonam                    | ≤0.015                   | 0.06              | ≤0.015 – 64  | 96.2                       |
|                                                   | Piperacillin–tazobactam      | ≤0.25                    | 2                 | ≤0.25 – 128  | 98.7                       |
|                                                   | Doripenem                    | 0.25                     | 0.5               | 0.06 – 1     | 100                        |
|                                                   | Imipenem                     | 2                        | 4                 | 0.25 – 8     | 16.7                       |
|                                                   | Meropenem                    | 0.12                     | 0.12              | ≤0.004 – 0.5 | 100                        |
|                                                   | Amikacin                     | 4                        | 8                 | 0.5 – 16     | 100                        |
|                                                   | Colistin (n=47) <sup>d</sup> | >4                       | >4                | 4 – >4       | 0                          |
|                                                   | Tigecycline                  | 2                        | 4                 | 0.5 – >8     | 73.1                       |
|                                                   | Levofloxacin                 | 0.12                     | 4                 | ≤0.03 – >4   | 85.9                       |
| Ceftazidime-nonsusceptible (2)                    | Ceftazidime–avibactam        | — <sup>b</sup>           | —                 | 0.06 – 32    | 50.0                       |
|                                                   | Ceftazidime                  | —                        | —                 | 8 – 32       | 0                          |
|                                                   | Cefepime                     | —                        | —                 | 4 – 4        | 0                          |
|                                                   | Aztreonam                    | —                        | —                 | ≤0.015 – 16  | 50.0                       |
|                                                   | Piperacillin–tazobactam      | —                        | —                 | 4 – 64       | 50.0                       |
|                                                   | Doripenem                    | —                        | —                 | 0.25 – >4    | 50.0                       |
|                                                   | Imipenem                     | —                        | —                 | 4 – >8       | 0                          |
|                                                   | Meropenem                    | —                        | —                 | 0.06 – >8    | 50.0                       |
|                                                   | Amikacin                     | —                        | —                 | 2 – 4        | 100                        |
|                                                   | Colistin (n=2) <sup>d</sup>  | —                        | —                 | >4 – >4      | 0                          |
|                                                   | Tigecycline                  | —                        | —                 | 1 – 4        | 50.0                       |
|                                                   | Levofloxacin                 | —                        | —                 | 0.12 – 4     | 50.0                       |
| Ceftazidime-nonsusceptible, MBL–negative (1)      | Ceftazidime–avibactam        | — <sup>b</sup>           | —                 | 0.06         | 100                        |
|                                                   | Ceftazidime                  | —                        | —                 | 8            | 0                          |
|                                                   | Cefepime                     | —                        | —                 | 4            | 0                          |
|                                                   | Aztreonam                    | —                        | —                 | 16           | 0                          |
|                                                   | Piperacillin–tazobactam      | —                        | —                 | 4            | 100                        |
|                                                   | Doripenem                    | —                        | —                 | 0.25         | 100                        |
|                                                   | Imipenem                     | —                        | —                 | 4            | 0                          |
|                                                   | Meropenem                    | —                        | —                 | 0.06         | 100                        |
|                                                   | Amikacin                     | —                        | —                 | 4            | 100                        |
|                                                   | Colistin (n=1) <sup>d</sup>  | —                        | —                 | >4           | 0                          |
|                                                   | Tigecycline                  | —                        | —                 | 4            | 0                          |
|                                                   | Levofloxacin                 | —                        | —                 | 4            | 0                          |
| Meropenem-nonsusceptible (1) <sup>j</sup>         | Ceftazidime–avibactam        | — <sup>b</sup>           | —                 | 32           | 0                          |
|                                                   | Ceftazidime                  | —                        | —                 | 32           | 0                          |

| Phenotype/Organism (no. of isolates) <sup>a</sup>  | Antimicrobial agent                  | MIC (µg/ml) <sup>b</sup> |                   |           | % Susceptible <sup>c</sup> |     |
|----------------------------------------------------|--------------------------------------|--------------------------|-------------------|-----------|----------------------------|-----|
|                                                    |                                      | MIC <sub>50</sub>        | MIC <sub>90</sub> | Range     |                            |     |
|                                                    | Cefepime                             | —                        | —                 | 4         | 0                          |     |
|                                                    | Aztreonam                            | —                        | —                 | ≤0.015    | 100                        |     |
|                                                    | Piperacillin–tazobactam              | —                        | —                 | 64        | 0                          |     |
|                                                    | Doripenem                            | —                        | —                 | >4        | 0                          |     |
|                                                    | Imipenem                             | —                        | —                 | >8        | 0                          |     |
|                                                    | Meropenem                            | —                        | —                 | >8        | 0                          |     |
|                                                    | Amikacin                             | —                        | —                 | 2         | 100                        |     |
|                                                    | Colistin (n=1) <sup>d</sup>          | —                        | —                 | >4        | 0                          |     |
|                                                    | Tigecycline                          | —                        | —                 | 1         | 100                        |     |
|                                                    | Levofloxacin                         | —                        | —                 | 0.12      | 100                        |     |
|                                                    | Multidrug-resistant (1) <sup>f</sup> | Ceftazidime–avibactam    | — <sup>b</sup>    | —         | 0.12                       | 100 |
|                                                    |                                      | Ceftazidime              | —                 | —         | 0.5                        | 100 |
|                                                    |                                      | Cefepime                 | —                 | —         | >16                        | 0   |
| Aztreonam                                          |                                      | —                        | —                 | 64        | 0                          |     |
| Piperacillin–tazobactam                            |                                      | —                        | —                 | 128       | 0                          |     |
| Doripenem                                          |                                      | —                        | —                 | 0.12      | 100                        |     |
| Imipenem                                           |                                      | —                        | —                 | 4         | 0                          |     |
| Meropenem                                          |                                      | —                        | —                 | 0.25      | 100                        |     |
| Amikacin                                           |                                      | —                        | —                 | 16        | 100                        |     |
| Colistin (n=1) <sup>d</sup>                        |                                      | —                        | —                 | >4        | 0                          |     |
| Tigecycline                                        |                                      | —                        | —                 | 2         | 100                        |     |
| Levofloxacin                                       |                                      | —                        | —                 | >4        | 0                          |     |
| <b>Other <i>Enterobacteriaceae</i><sup>f</sup></b> |                                      |                          |                   |           |                            |     |
| All (18) <sup>k</sup>                              | Ceftazidime–avibactam                | 0.25                     | 0.5               | 0.06–0.5  | 100                        |     |
|                                                    | Ceftazidime                          | 0.12                     | 1                 | 0.06–>128 | 94.4                       |     |
|                                                    | Cefepime                             | ≤0.12                    | 0.5               | ≤0.12–4   | 94.4                       |     |
|                                                    | Aztreonam                            | 0.12                     | 1                 | 0.06–>128 | 94.4                       |     |
|                                                    | Piperacillin–tazobactam              | 2                        | 16                | ≤0.25–128 | 94.4                       |     |
|                                                    | Doripenem                            | 0.12                     | 0.12              | 0.06–0.5  | 100                        |     |
|                                                    | Imipenem                             | 0.5                      | 1                 | 0.25–2    | 94.4                       |     |
|                                                    | Meropenem                            | 0.06                     | 0.06              | 0.03–0.25 | 100                        |     |
|                                                    | Amikacin                             | 2                        | 4                 | 1–4       | 100                        |     |
|                                                    | Colistin (n=12) <sup>d</sup>         | >4                       | >4                | 4–>4      | 0                          |     |
|                                                    | Tigecycline                          | 1                        | 2                 | 0.5–4     | 94.4                       |     |
|                                                    | Levofloxacin                         | 0.12                     | 0.5               | 0.06–2    | 100                        |     |
|                                                    | Ceftazidime-nonsusceptible (1)       | Ceftazidime–avibactam    | — <sup>b</sup>    | —         | 0.5                        | 100 |
|                                                    |                                      | Ceftazidime              | —                 | —         | >128                       | 0   |
| Cefepime                                           |                                      | —                        | —                 | 4         | 0                          |     |
| Aztreonam                                          |                                      | —                        | —                 | >128      | 0                          |     |
| Piperacillin–tazobactam                            |                                      | —                        | —                 | 128       | 0                          |     |
| Doripenem                                          |                                      | —                        | —                 | 0.12      | 100                        |     |
| Imipenem                                           |                                      | —                        | —                 | 0.5       | 100                        |     |
| Meropenem                                          |                                      | —                        | —                 | 0.06      | 100                        |     |
| Amikacin                                           |                                      | —                        | —                 | 4         | 100                        |     |
| Colistin (n=1) <sup>d</sup>                        |                                      | —                        | —                 | >4        | 0                          |     |
| Tigecycline                                        |                                      | —                        | —                 | 1         | 100                        |     |
| Levofloxacin                                       |                                      | —                        | —                 | 0.12      | 100                        |     |
| Multidrug-resistant (1)                            |                                      | Ceftazidime–avibactam    | — <sup>b</sup>    | —         | 0.5                        | 100 |
|                                                    | Ceftazidime                          | —                        | —                 | >128      | 0                          |     |
|                                                    | Cefepime                             | —                        | —                 | 4         | 0                          |     |
|                                                    | Aztreonam                            | —                        | —                 | >128      | 0                          |     |
|                                                    | Piperacillin–tazobactam              | —                        | —                 | 128       | 0                          |     |
|                                                    | Doripenem                            | —                        | —                 | 0.12      | 100                        |     |
|                                                    | Imipenem                             | —                        | —                 | 0.5       | 100                        |     |
|                                                    | Meropenem                            | —                        | —                 | 0.06      | 100                        |     |
|                                                    | Amikacin                             | —                        | —                 | 4         | 100                        |     |
|                                                    | Colistin (n=1) <sup>d</sup>          | —                        | —                 | >4        | 0                          |     |
|                                                    | Tigecycline                          | —                        | —                 | 1         | 100                        |     |
|                                                    | Levofloxacin                         | —                        | —                 | 0.12      | 100                        |     |

| Phenotype/Organism (no. of isolates) <sup>a</sup> | Antimicrobial agent                           | MIC (μg/ml) <sup>b</sup> |                   |              | % Susceptible <sup>c</sup> |      |
|---------------------------------------------------|-----------------------------------------------|--------------------------|-------------------|--------------|----------------------------|------|
|                                                   |                                               | MIC <sub>50</sub>        | MIC <sub>90</sub> | Range        |                            |      |
| <i>Pseudomonas aeruginosa</i>                     |                                               |                          |                   |              |                            |      |
| All (169)                                         | Ceftazidime–avibactam                         | 2                        | 8                 | 0.5 – >128   | 94.7                       |      |
|                                                   | Ceftazidime                                   | 2                        | 32                | 0.5 – >128   | 84.0                       |      |
|                                                   | Cefepime                                      | 2                        | 16                | 0.5 – >16    | 89.4                       |      |
|                                                   | Aztreonam                                     | 8                        | 32                | 0.5 – >128   | 75.7                       |      |
|                                                   | Piperacillin–tazobactam                       | 8                        | 32                | ≤0.25 – >128 | 81.1                       |      |
|                                                   | Doripenem                                     | 0.5                      | 4                 | 0.06 – >4    | 85.8                       |      |
|                                                   | Imipenem                                      | 2                        | >8                | 0.25 – >8    | 81.1                       |      |
|                                                   | Meropenem                                     | 0.5                      | 4                 | ≤0.06 – >8   | 85.8                       |      |
|                                                   | Amikacin                                      | 4                        | 8                 | 0.5 – >32    | 94.7                       |      |
|                                                   | Colistin (n=140) <sup>d</sup>                 | 2                        | 2                 | 0.25 – >8    | 91.4                       |      |
|                                                   | Levofloxacin                                  | 0.5                      | 2                 | 0.06 – >4    | 90.5                       |      |
|                                                   | All, MBL–negative (164)                       | Ceftazidime–avibactam    | 2                 | 4            | 0.5 – >128                 | 97.6 |
|                                                   |                                               | Ceftazidime              | 2                 | 16           | 0.5 – >128                 | 86.6 |
| Cefepime                                          |                                               | 2                        | 8                 | 0.5 – >16    | 92.1                       |      |
| Aztreonam                                         |                                               | 8                        | 32                | 0.5 – >128   | 78.1                       |      |
| Piperacillin–tazobactam                           |                                               | 8                        | 32                | ≤0.25 – >128 | 83.5                       |      |
| Doripenem                                         |                                               | 0.5                      | 4                 | 0.06 – >4    | 88.4                       |      |
| Imipenem                                          |                                               | 2                        | 8                 | 0.25 – >8    | 83.5                       |      |
| Meropenem                                         |                                               | 0.5                      | 4                 | ≤0.06 – >8   | 88.4                       |      |
| Amikacin                                          |                                               | 4                        | 8                 | 0.5 – >32    | 96.3                       |      |
| Colistin (n=136) <sup>d</sup>                     |                                               | 2                        | 2                 | 0.25 – 8     | 91.2                       |      |
| Levofloxacin                                      |                                               | 0.5                      | 2                 | 0.06 – >4    | 92.1                       |      |
| Ceftazidime-nonsusceptible (27)                   |                                               | Ceftazidime–avibactam    | 8                 | >128         | 2 – >128                   | 66.7 |
|                                                   |                                               | Ceftazidime              | 64                | >128         | 16 – >128                  | 0    |
|                                                   | Cefepime                                      | 16                       | >16               | 2 – >16      | 33.3                       |      |
|                                                   | Aztreonam                                     | 32                       | 128               | 8 – >128     | 18.5                       |      |
|                                                   | Piperacillin–tazobactam                       | 64                       | >128              | 16 – >128    | 11.1                       |      |
|                                                   | Doripenem                                     | 4                        | >4                | 0.12 – >4    | 48.2                       |      |
|                                                   | Imipenem                                      | 2                        | >8                | 0.5 – >8     | 51.9                       |      |
|                                                   | Meropenem                                     | 2                        | >8                | 0.12 – >8    | 51.9                       |      |
|                                                   | Amikacin                                      | 4                        | >32               | 2 – >32      | 70.4                       |      |
|                                                   | Colistin (n=23) <sup>d</sup>                  | 2                        | 4                 | 0.5 – 4      | 87.0                       |      |
|                                                   | Levofloxacin                                  | 2                        | >4                | 0.25 – >4    | 59.3                       |      |
|                                                   | Ceftazidime-nonsusceptible, MBL–negative (22) | Ceftazidime–avibactam    | 4                 | 16           | 2 – >128                   | 81.8 |
|                                                   |                                               | Ceftazidime              | 32                | >128         | 16 – >128                  | 0    |
| Cefepime                                          |                                               | 16                       | >16               | 2 – >16      | 40.9                       |      |
| Aztreonam                                         |                                               | 16                       | 128               | 8 – >128     | 22.7                       |      |
| Piperacillin–tazobactam                           |                                               | 32                       | >128              | 16 – >128    | 13.6                       |      |
| Doripenem                                         |                                               | 2                        | >4                | 0.12 – >4    | 59.1                       |      |
| Imipenem                                          |                                               | 2                        | >8                | 0.5 – >8     | 63.6                       |      |
| Meropenem                                         |                                               | 1                        | >8                | 0.12 – >8    | 63.6                       |      |
| Amikacin                                          |                                               | 4                        | 32                | 2 – >32      | 77.3                       |      |
| Colistin (n=19) <sup>d</sup>                      |                                               | 2                        | 4                 | 1 – 4        | 84.2                       |      |
| Levofloxacin                                      |                                               | 2                        | >4                | 0.5 – >4     | 63.6                       |      |
| Meropenem-nonsusceptible (24)                     |                                               | Ceftazidime–avibactam    | 4                 | >128         | 2 – >128                   | 66.7 |
|                                                   |                                               | Ceftazidime              | 16                | >128         | 2 – >128                   | 45.8 |
|                                                   | Cefepime                                      | 8                        | >16               | 2 – >16      | 50.0                       |      |
|                                                   | Aztreonam                                     | 16                       | 128               | 4 – >128     | 20.8                       |      |
|                                                   | Piperacillin–tazobactam                       | 32                       | >128              | 4 – >128     | 33.3                       |      |
|                                                   | Doripenem                                     | 4                        | >4                | 1 – >4       | 4.2                        |      |
|                                                   | Imipenem                                      | >8                       | >8                | 2 – >8       | 8.3                        |      |
|                                                   | Meropenem                                     | 8                        | >8                | 4 – >8       | 0                          |      |
|                                                   | Amikacin                                      | 4                        | >32               | 2 – >32      | 79.2                       |      |
|                                                   | Colistin (n=19) <sup>d</sup>                  | 1                        | 2                 | 0.5 – 4      | 94.7                       |      |
|                                                   | Levofloxacin                                  | 2                        | >4                | 0.25 – >4    | 70.8                       |      |
|                                                   | Meropenem-nonsusceptible, MBL–negative (19)   | Ceftazidime–avibactam    | 4                 | 32           | 2 – >128                   | 84.2 |
|                                                   |                                               | Ceftazidime              | 8                 | >128         | 2 – >128                   | 57.9 |
| Cefepime                                          |                                               | 8                        | >16               | 2 – >16      | 63.2                       |      |



| Phenotype/Organism (no. of isolates) <sup>a</sup> | Antimicrobial agent          | MIC (μg/ml) <sup>b</sup> |                   |            | % Susceptible <sup>c</sup> |
|---------------------------------------------------|------------------------------|--------------------------|-------------------|------------|----------------------------|
|                                                   |                              | MIC <sub>50</sub>        | MIC <sub>90</sub> | Range      |                            |
|                                                   | Aztreonam                    | 16                       | 128               | 4 – >128   | 26.3                       |
|                                                   | Piperacillin–tazobactam      | 32                       | >128              | 4 – >128   | 42.1                       |
|                                                   | Doripenem                    | 4                        | >4                | 1 – >4     | 5.3                        |
|                                                   | Imipenem                     | >8                       | >8                | 2 – >8     | 10.5                       |
|                                                   | Meropenem                    | 8                        | >8                | 4 – >8     | 0                          |
|                                                   | Amikacin                     | 4                        | 32                | 2 – >32    | 89.5                       |
|                                                   | Colistin (n=15) <sup>d</sup> | 1                        | 2                 | 0.5 – 4    | 93.3                       |
|                                                   | Levofloxacin                 | 2                        | >4                | 0.5 – >4   | 79.0                       |
| Colistin-resistant (2) <sup>f</sup>               | Ceftazidime–avibactam        | — <sup>b</sup>           | —                 | 2 – 4      | 100                        |
|                                                   | Ceftazidime                  | —                        | —                 | 1 – 8      | 100                        |
|                                                   | Cefepime                     | —                        | —                 | 2 – 4      | 100                        |
|                                                   | Aztreonam                    | —                        | —                 | 8 – 16     | 50.0                       |
|                                                   | Piperacillin–tazobactam      | —                        | —                 | 8 – 8      | 100                        |
|                                                   | Doripenem                    | —                        | —                 | 0.25 – 0.5 | 100                        |
|                                                   | Imipenem                     | —                        | —                 | 2 – 2      | 100                        |
|                                                   | Meropenem                    | —                        | —                 | 0.5 – 1    | 100                        |
|                                                   | Amikacin                     | —                        | —                 | 4 – 8      | 100                        |
|                                                   | Colistin (n=2) <sup>d</sup>  | —                        | —                 | >4 – >4    | 0                          |
|                                                   | Levofloxacin                 | —                        | —                 | 0.5 – 2    | 100                        |
| Multidrug-resistant (12)                          | Ceftazidime–avibactam        | 16                       | >128              | 4 – >128   | 41.7                       |
|                                                   | Ceftazidime                  | >128                     | >128              | 16 – >128  | 0                          |
|                                                   | Cefepime                     | >16                      | >16               | 16 – >16   | 0                          |
|                                                   | Aztreonam                    | 32                       | >128              | 16 – >128  | 0                          |
|                                                   | Piperacillin–tazobactam      | 128                      | >128              | 32 – >128  | 0                          |
|                                                   | Doripenem                    | >4                       | >4                | 1 – >4     | 8.3                        |
|                                                   | Imipenem                     | >8                       | >8                | 2 – >8     | 16.7                       |
|                                                   | Meropenem                    | >8                       | >8                | 1 – >8     | 8.3                        |
|                                                   | Amikacin                     | 32                       | >32               | 2 – >32    | 50.0                       |
|                                                   | Colistin (n=10) <sup>d</sup> | 1                        | 2                 | 0.5 – 2    | 100                        |
|                                                   | Levofloxacin                 | >4                       | >4                | 1 – >4     | 33.3                       |
| Multidrug-resistant, MBL-negative (8)             | Ceftazidime–avibactam        | — <sup>b</sup>           | —                 | 4 – >128   | 62.5                       |
|                                                   | Ceftazidime                  | —                        | —                 | 16 – >128  | 0                          |
|                                                   | Cefepime                     | —                        | —                 | 16 – >16   | 0                          |
|                                                   | Aztreonam                    | —                        | —                 | 16 – >128  | 0                          |
|                                                   | Piperacillin–tazobactam      | —                        | —                 | 32 – >128  | 0                          |
|                                                   | Doripenem                    | —                        | —                 | 1 – >4     | 12.5                       |
|                                                   | Imipenem                     | —                        | —                 | 2 – >8     | 25.0                       |
|                                                   | Meropenem                    | —                        | —                 | 1 – >8     | 12.5                       |
|                                                   | Amikacin                     | —                        | —                 | 2 – >32    | 62.5                       |
|                                                   | Colistin (n=7) <sup>d</sup>  | —                        | —                 | 1 – 2      | 100                        |
|                                                   | Levofloxacin                 | —                        | —                 | 1 – >4     | 37.5                       |

<sup>a</sup> MBL-negative, no gene encoding a metallo-β-lactamase was detected by PCR.

<sup>b</sup> —, MIC<sub>50</sub> and MIC<sub>90</sub> were not calculated for n < 10 isolates.

<sup>c</sup> % Susceptibility was determined according to CLSI 2016 breakpoints with the exception of ceftazidime–avibactam and tigecycline, where US FDA breakpoints were applied. Because CLSI colistin breakpoints are not available for the *Enterobacteriaceae*, susceptibility for this organism group was determined using the EUCAST 2016 breakpoints for colistin.

<sup>d</sup> Values are for colistin tested without 0.002% polysorbate-80; isolates collected in 2014–2015 only.

<sup>e</sup> Excludes isolates of *Proteaeae* and *Serratia* spp. that are intrinsically resistant to colistin.

<sup>f</sup> All isolates were MBL-negative.

<sup>g</sup> *Enterobacter* spp. includes *Enterobacter aerogenes* (n=20), *Enterobacter asburiae* (n=4), *Enterobacter cloacae* (n=44), and *Enterobacter kobei* (n=1).

<sup>h</sup> *Citrobacter* spp. includes *Citrobacter amalonaticus* (n=1), *Citrobacter freundii* (n=4), and *Citrobacter koseri* (n=20).

<sup>i</sup> Proteeae includes *Morganella morganii* (n=15), *Proteus mirabilis* (n=44), *Proteus vulgaris* (n=14), *Providencia rettgeri* (n=2), and *Providencia stuartii* (n=4).

<sup>j</sup> All isolates were MBL-positive.

<sup>k</sup> Other *Enterobacteriaceae* includes *Serratia marcescens* (n=17) and *Serratia rubidaea* (n=1).

**Supplemental Table S6B.** Malaysia – *In vitro* activities of ceftazidime–avibactam and comparator antimicrobial agents tested against 185 isolates of  $\beta$ –lactamase–positive *Enterobacteriaceae* (n=157) and *P. aeruginosa* (n=28) collected as part of the INFORM global surveillance program in 2013–2015.

| Organism/Genotype (no. of isolates) <sup>a</sup>     | Antimicrobial agent                            | MIC ( $\mu\text{g/ml}$ ) <sup>b</sup> |                   |                 | % Susceptible <sup>c</sup> |
|------------------------------------------------------|------------------------------------------------|---------------------------------------|-------------------|-----------------|----------------------------|
|                                                      |                                                | MIC <sub>50</sub>                     | MIC <sub>90</sub> | Range           |                            |
| <i>Enterobacteriaceae</i> (157)<br>OSBL–positive (1) | Ceftazidime–avibactam                          | — <sup>b</sup>                        | —                 | 0.12            | 100                        |
|                                                      | Ceftazidime                                    | —                                     | —                 | 16              | 0                          |
|                                                      | Cefepime                                       | —                                     | —                 | 8               | 0                          |
|                                                      | Aztreonam                                      | —                                     | —                 | 32              | 0                          |
|                                                      | Piperacillin–tazobactam                        | —                                     | —                 | 4               | 100                        |
|                                                      | Doripenem                                      | —                                     | —                 | 0.06            | 100                        |
|                                                      | Imipenem                                       | —                                     | —                 | 0.25            | 100                        |
|                                                      | Meropenem                                      | —                                     | —                 | 0.03            | 100                        |
|                                                      | Amikacin                                       | —                                     | —                 | 4               | 100                        |
|                                                      | Colistin (n=0) <sup>d</sup>                    | —                                     | —                 | ND <sup>e</sup> | ND                         |
|                                                      | Tigecycline                                    | —                                     | —                 | 1               | 100                        |
|                                                      | Levofloxacin                                   | —                                     | —                 | 0.5             | 100                        |
|                                                      | ESBL–positive (132) <sup>f</sup>               | Ceftazidime–avibactam                 | 0.25              | 1               | ≤0.015 – 4                 |
| Ceftazidime                                          |                                                | 32                                    | >128              | 0.5 – >128      | 13.6                       |
| Cefepime                                             |                                                | >16                                   | >16               | 1 – >16         | 3.0                        |
| Aztreonam                                            |                                                | 64                                    | >128              | 2 – >128        | 3.0                        |
| Piperacillin–tazobactam                              |                                                | 8                                     | >128              | 0.5 – >128      | 62.9                       |
| Doripenem                                            |                                                | 0.06                                  | 0.12              | 0.03 – 1        | 100                        |
| Imipenem                                             |                                                | 0.25                                  | 0.5               | 0.12 – 4        | 99.2                       |
| Meropenem                                            |                                                | 0.06                                  | 0.12              | 0.015 – 2       | 99.2                       |
| Amikacin                                             |                                                | 2                                     | 16                | 0.5 – 32        | 98.5                       |
| Colistin (n=86) <sup>d</sup>                         |                                                | 0.5                                   | 1                 | 0.25 – >4       | 93.0                       |
| Tigecycline                                          |                                                | 1                                     | 2                 | 0.12 – 8        | 97.7                       |
| Levofloxacin                                         |                                                | 1                                     | >4                | ≤0.03 – >4      | 66.7                       |
| AmpC–positive (15) <sup>g</sup>                      |                                                | Ceftazidime–avibactam                 | 0.25              | 0.25            | 0.03 – 0.5                 |
|                                                      | Ceftazidime                                    | 16                                    | 128               | 0.12 – 128      | 33.3                       |
|                                                      | Cefepime                                       | ≤0.12                                 | 1                 | ≤0.12 – 2       | 100                        |
|                                                      | Aztreonam                                      | 4                                     | 32                | 0.06 – 32       | 60.0                       |
|                                                      | Piperacillin–tazobactam                        | 4                                     | 16                | 0.5 – 32        | 93.3                       |
|                                                      | Doripenem                                      | 0.06                                  | 0.5               | 0.03 – 1        | 100                        |
|                                                      | Imipenem                                       | 1                                     | 2                 | 0.25 – 8        | 66.7                       |
|                                                      | Meropenem                                      | 0.06                                  | 0.25              | 0.03 – 0.25     | 100                        |
|                                                      | Amikacin                                       | 2                                     | 4                 | 1 – 4           | 100                        |
|                                                      | Colistin (n=9) <sup>d</sup>                    | — <sup>b</sup>                        | —                 | 0.25 – 4        | 88.9                       |
|                                                      | Tigecycline                                    | 0.5                                   | 2                 | 0.12 – 4        | 93.3                       |
|                                                      | Levofloxacin                                   | 1                                     | >4                | 0.06 – >4       | 73.3                       |
|                                                      | ESBL–positive + AmpC–positive (7) <sup>h</sup> | Ceftazidime–avibactam                 | — <sup>b</sup>    | —               | 0.03 – 0.5                 |
| Ceftazidime                                          |                                                | —                                     | —                 | 32 – 128        | 0                          |
| Cefepime                                             |                                                | —                                     | —                 | 8 – >16         | 0                          |
| Aztreonam                                            |                                                | —                                     | —                 | 16 – 128        | 0                          |
| Piperacillin–tazobactam                              |                                                | —                                     | —                 | 4 – >128        | 85.7                       |
| Doripenem                                            |                                                | —                                     | —                 | 0.03 – 0.25     | 100                        |
| Imipenem                                             |                                                | —                                     | —                 | 0.12 – 2        | 71.4                       |
| Meropenem                                            |                                                | —                                     | —                 | 0.03 – 0.06     | 100                        |
| Amikacin                                             |                                                | —                                     | —                 | 1 – 4           | 100                        |
| Colistin (n=4) <sup>d</sup>                          |                                                | —                                     | —                 | 0.5 – 1         | 100                        |
| Tigecycline                                          |                                                | —                                     | —                 | 0.12 – 2        | 100                        |
| Levofloxacin                                         |                                                | —                                     | —                 | 0.12 – >4       | 57.1                       |
| MBL–positive (2) <sup>i</sup>                        |                                                | Ceftazidime–avibactam                 | — <sup>b</sup>    | —               | 32 – >128                  |
|                                                      | Ceftazidime                                    | —                                     | —                 | 32 – >128       | 0                          |

| Organism/Genotype (no. of isolates) <sup>a</sup>   | Antimicrobial agent          | MIC (µg/ml) <sup>b</sup> |                   |                 | % Susceptible <sup>c</sup> |
|----------------------------------------------------|------------------------------|--------------------------|-------------------|-----------------|----------------------------|
|                                                    |                              | MIC <sub>50</sub>        | MIC <sub>90</sub> | Range           |                            |
|                                                    | Cefepime                     | —                        | —                 | 4 – >16         | 0                          |
|                                                    | Aztreonam                    | —                        | —                 | 2 – 16          | 50.0                       |
|                                                    | Piperacillin–tazobactam      | —                        | —                 | 64 – >128       | 0                          |
|                                                    | Doripenem                    | —                        | —                 | >4 – >4         | 0                          |
|                                                    | Imipenem                     | —                        | —                 | >8 – >8         | 0                          |
|                                                    | Meropenem                    | —                        | —                 | >8 – >8         | 0                          |
|                                                    | Amikacin                     | —                        | —                 | 2 – 16          | 100                        |
|                                                    | Colistin (n=2) <sup>d</sup>  | —                        | —                 | 1 – >4          | 50.0                       |
|                                                    | Tigecycline                  | —                        | —                 | 0.5 – 1         | 100                        |
|                                                    | Levofloxacin                 | —                        | —                 | 0.12 – 2        | 100                        |
| <i>P. aeruginosa</i> (28)                          | Ceftazidime–avibactam        | — <sup>b</sup>           | —                 | 4               | 100                        |
| ESBL–positive (1) <sup>j,k</sup>                   | Ceftazidime                  | —                        | —                 | 128             | 0                          |
|                                                    | Cefepime                     | —                        | —                 | >16             | 0                          |
|                                                    | Aztreonam                    | —                        | —                 | 16              | 0                          |
|                                                    | Piperacillin–tazobactam      | —                        | —                 | 32              | 0                          |
|                                                    | Doripenem                    | —                        | —                 | 4               | 0                          |
|                                                    | Imipenem                     | —                        | —                 | >8              | 0                          |
|                                                    | Meropenem                    | —                        | —                 | 8               | 0                          |
|                                                    | Amikacin                     | —                        | —                 | 32              | 0                          |
|                                                    | Colistin (n=1) <sup>d</sup>  | —                        | —                 | 1               | 100                        |
|                                                    | Levofloxacin                 | —                        | —                 | >4              | 0                          |
| GES carbapenemase–positive (1) <sup>j,l</sup>      | Ceftazidime–avibactam        | — <sup>b</sup>           | —                 | 8               | 100                        |
|                                                    | Ceftazidime                  | —                        | —                 | >128            | 0                          |
|                                                    | Cefepime                     | —                        | —                 | >16             | 0                          |
|                                                    | Aztreonam                    | —                        | —                 | 128             | 0                          |
|                                                    | Piperacillin–tazobactam      | —                        | —                 | >128            | 0                          |
|                                                    | Doripenem                    | —                        | —                 | >4              | 0                          |
|                                                    | Imipenem                     | —                        | —                 | 2               | 100                        |
|                                                    | Meropenem                    | —                        | —                 | 4               | 0                          |
|                                                    | Amikacin                     | —                        | —                 | 8               | 100                        |
|                                                    | Colistin (n=0) <sup>d</sup>  | —                        | —                 | ND <sup>e</sup> | ND                         |
|                                                    | Levofloxacin                 | —                        | —                 | >4              | 0                          |
| MBL–positive (5) <sup>j,m</sup>                    | Ceftazidime–avibactam        | — <sup>b</sup>           | —                 | >128 – >128     | 0                          |
|                                                    | Ceftazidime                  | —                        | —                 | >128 – >128     | 0                          |
|                                                    | Cefepime                     | —                        | —                 | >16 – >16       | 0                          |
|                                                    | Aztreonam                    | —                        | —                 | 16 – >128       | 0                          |
|                                                    | Piperacillin–tazobactam      | —                        | —                 | 64 – >128       | 0                          |
|                                                    | Doripenem                    | —                        | —                 | 4 – >4          | 0                          |
|                                                    | Imipenem                     | —                        | —                 | >8 – >8         | 0                          |
|                                                    | Meropenem                    | —                        | —                 | 4 – >8          | 0                          |
|                                                    | Amikacin                     | —                        | —                 | 4 – >32         | 40.0                       |
|                                                    | Colistin (n=4) <sup>d</sup>  | —                        | —                 | 0.5 – 2         | 100                        |
|                                                    | Levofloxacin                 | —                        | —                 | 0.25 – >4       | 40.0                       |
| No acquired β–lactamase detected (21) <sup>j</sup> | Ceftazidime–avibactam        | 4                        | 16                | 1 – >128        | 85.7                       |
|                                                    | Ceftazidime                  | 4                        | >128              | 1 – >128        | 71.4                       |
|                                                    | Cefepime                     | 4                        | >16               | 2 – >16         | 76.2                       |
|                                                    | Aztreonam                    | 16                       | 32                | 4 – >128        | 42.9                       |
|                                                    | Piperacillin–tazobactam      | 16                       | 128               | 4 – >128        | 57.1                       |
|                                                    | Doripenem                    | 4                        | >4                | 0.5 – >4        | 23.8                       |
|                                                    | Imipenem                     | >8                       | >8                | 2 – >8          | 4.8                        |
|                                                    | Meropenem                    | 8                        | >8                | 0.5 – >8        | 19.0                       |
|                                                    | Amikacin                     | 4                        | 8                 | 2 – >32         | 95.2                       |
|                                                    | Colistin (n=17) <sup>d</sup> | 1                        | 4                 | 0.5 – 4         | 88.2                       |
|                                                    | Levofloxacin                 | 2                        | 2                 | 0.25 – >4       | 90.5                       |

<sup>a</sup> OSBL, original–spectrum β–lactamase (e.g. TEM–1, SHV–1, SHV–11); ESBL, extended–spectrum β–lactamase; MBL, metallo–β–lactamase.

<sup>b</sup> —, MIC<sub>50</sub> and MIC<sub>90</sub> were not calculated for n < 10 isolates.

<sup>c</sup> % Susceptibility was determined according to CLSI 2016 breakpoints with the exception of ceftazidime–avibactam and tigecycline, where US FDA breakpoints were applied. Because CLSI colistin breakpoints are not available for the *Enterobacteriaceae*, susceptibility for this organism group was determined using the EUCAST 2016 breakpoints for colistin.

<sup>d</sup> Values are for colistin tested without 0.002% polysorbate–80; isolates collected in 2014–2015 only.

<sup>e</sup> ND, not determined; MIC range and % susceptible were not calculated for n=0 isolates.

<sup>f</sup> Includes isolates carrying CTX–M–3; CTX–M–9; CTX–M–14; CTX–M–15; CTX–M–24; CTX–M–27; CTX–M–55; CTX–M–65; SHV–12; CTX–M–15 and CTX–M–14; CTX–M–15 and CTX–M–27; CTX–M–15 and SHV–12; CTX–M–15 and SHV–115; with or without SHV–type or TEM–type OSBLs.

<sup>g</sup> Includes isolates carrying CMY–2; CMY–42; DHA–1; CMY–2 and DHA–1; and the chromosomal AmpC common to *Enterobacter* spp., *M. morgani*, and *Serratia* spp. with or without SHV–OSBLs and/or TEM–OSBLs.

<sup>h</sup> Includes isolates carrying CMY–2 and a CTX–M–type ESBL (CTX–M–3, CTX–M–14, CTX–M–15); CMY–42 and CTX–M–15; DHA–1 and CTX–M–15; and the chromosomal AmpC common to *Enterobacter* spp. and CTX–M–3).

<sup>i</sup> Isolates carrying NDM–1 and CTX–M–15; and NDM–1 and the chromosomal AmpC common to *Providencia* spp.

<sup>j</sup> Assumed to carry the chromosomal AmpC common to *P. aeruginosa*.

<sup>k</sup> Isolate carrying GES–1.

<sup>l</sup> Isolate carrying GES–13.

<sup>m</sup> Includes isolates carrying NDM–1; IMP–1; VIM–6; and VIM–6 and VEB–1A.

**Supplemental Table S7A.** Philippines – *In vitro* activities of ceftazidime–avibactam and comparator antimicrobial agents tested against 1,299 isolates of *Enterobacteriaceae* and 304 isolates of *P. aeruginosa* collected as part of the INFORM global surveillance program in 2012–2015

| Phenotype/Organism (no. of isolates) <sup>a</sup> | Antimicrobial agent           | MIC (µg/ml) <sup>b</sup> |                   |               | % Susceptible <sup>c</sup> |
|---------------------------------------------------|-------------------------------|--------------------------|-------------------|---------------|----------------------------|
|                                                   |                               | MIC <sub>50</sub>        | MIC <sub>90</sub> | Range         |                            |
| <i>Enterobacteriaceae</i>                         |                               |                          |                   |               |                            |
| All (1,299)                                       | Ceftazidime–avibactam         | 0.12                     | 0.5               | ≤0.015 – >128 | 97.0                       |
|                                                   | Ceftazidime                   | 0.25                     | 128               | ≤0.015 – >128 | 64.5                       |
|                                                   | Cefepime                      | ≤0.12                    | >16               | ≤0.12 – >16   | 72.0                       |
|                                                   | Aztreonam                     | 0.12                     | 128               | ≤0.015 – >128 | 66.0                       |
|                                                   | Piperacillin–tazobactam       | 4                        | 128               | ≤0.25 – >128  | 82.6                       |
|                                                   | Doripenem                     | 0.06                     | 0.25              | ≤0.008 – >4   | 95.6                       |
|                                                   | Imipenem                      | 0.25                     | 2                 | ≤0.03 – >8    | 83.3                       |
|                                                   | Meropenem                     | 0.03                     | 0.12              | 0.015 – >8    | 95.8                       |
|                                                   | Amikacin                      | 2                        | 8                 | ≤0.25 – >32   | 97.1                       |
|                                                   | Colistin (n=683) <sup>d</sup> | 1                        | >4                | ≤0.12 – >4    | 80.4                       |
|                                                   | Tigecycline                   | 0.5                      | 2                 | 0.06 – >8     | 92.1                       |
|                                                   | Levofloxacin                  | 0.5                      | >4                | ≤0.03 – >4    | 68.1                       |
| All, MBL–negative (1,264)                         | Ceftazidime–avibactam         | 0.12                     | 0.5               | ≤0.015 – >128 | 99.7                       |
|                                                   | Ceftazidime                   | 0.25                     | 128               | ≤0.015 – >128 | 66.3                       |
|                                                   | Cefepime                      | ≤0.12                    | >16               | ≤0.12 – >16   | 73.9                       |
|                                                   | Aztreonam                     | 0.12                     | 64                | ≤0.015 – >128 | 67.0                       |
|                                                   | Piperacillin–tazobactam       | 4                        | 64                | ≤0.25 – >128  | 84.7                       |
|                                                   | Doripenem                     | 0.06                     | 0.25              | ≤0.008 – >4   | 98.3                       |
|                                                   | Imipenem                      | 0.25                     | 2                 | ≤0.03 – >8    | 85.4                       |
|                                                   | Meropenem                     | 0.03                     | 0.12              | 0.015 – >8    | 98.4                       |
|                                                   | Amikacin                      | 2                        | 8                 | ≤0.25 – >32   | 98.4                       |
|                                                   | Colistin (n=661) <sup>d</sup> | 1                        | >4                | ≤0.12 – >4    | 80.0                       |
|                                                   | Tigecycline                   | 0.5                      | 2                 | 0.06 – >8     | 92.4                       |
|                                                   | Levofloxacin                  | 0.5                      | >4                | ≤0.03 – >4    | 69.0                       |
| Ceftazidime-nonsusceptible (461)                  | Ceftazidime–avibactam         | 0.25                     | 2                 | ≤0.015 – >128 | 91.5                       |
|                                                   | Ceftazidime                   | 64                       | >128              | 8 – >128      | 0                          |
|                                                   | Cefepime                      | 16                       | >16               | ≤0.12 – >16   | 27.6                       |
|                                                   | Aztreonam                     | 64                       | 128               | ≤0.015 – >128 | 9.8                        |
|                                                   | Piperacillin–tazobactam       | 16                       | >128              | ≤0.25 – >128  | 55.8                       |
|                                                   | Doripenem                     | 0.06                     | 4                 | 0.015 – >4    | 88.1                       |
|                                                   | Imipenem                      | 0.25                     | 4                 | ≤0.03 – >8    | 84.2                       |
|                                                   | Meropenem                     | 0.06                     | 8                 | 0.015 – >8    | 88.3                       |
|                                                   | Amikacin                      | 4                        | 16                | ≤0.25 – >32   | 92.6                       |
|                                                   | Colistin (n=256) <sup>d</sup> | 0.5                      | 2                 | 0.25 – >4     | 91.0                       |
|                                                   | Tigecycline                   | 0.5                      | 2                 | 0.06 – 8      | 92.0                       |
|                                                   | Levofloxacin                  | >4                       | >4                | ≤0.03 – >4    | 43.6                       |
| Ceftazidime-nonsusceptible, MBL–negative (426)    | Ceftazidime–avibactam         | 0.25                     | 1                 | ≤0.015 – >128 | 99.1                       |
|                                                   | Ceftazidime                   | 64                       | >128              | 8 – >128      | 0                          |
|                                                   | Cefepime                      | 16                       | >16               | ≤0.12 – >16   | 29.6                       |
|                                                   | Aztreonam                     | 64                       | >128              | 0.25 – >128   | 8.2                        |
|                                                   | Piperacillin–tazobactam       | 16                       | >128              | ≤0.25 – >128  | 59.9                       |
|                                                   | Doripenem                     | 0.06                     | 0.25              | 0.015 – >4    | 95.3                       |
|                                                   | Imipenem                      | 0.25                     | 1                 | ≤0.03 – >8    | 90.6                       |
|                                                   | Meropenem                     | 0.06                     | 0.12              | 0.015 – >8    | 95.3                       |
|                                                   | Amikacin                      | 4                        | 8                 | ≤0.25 – >32   | 96.2                       |
|                                                   | Colistin (n=234) <sup>d</sup> | 0.5                      | 2                 | 0.25 – >4     | 91.0                       |
|                                                   | Tigecycline                   | 0.5                      | 2                 | 0.06 – 8      | 93.0                       |
|                                                   | Levofloxacin                  | >4                       | >4                | ≤0.03 – >4    | 44.4                       |
| Meropenem-nonsusceptible (54)                     | Ceftazidime–avibactam         | >128                     | >128              | 0.06 – >128   | 29.6                       |

| Phenotype/Organism (no. of isolates) <sup>a</sup>  | Antimicrobial agent           | MIC (µg/ml) <sup>b</sup> |                   |               | % Susceptible <sup>c</sup> |
|----------------------------------------------------|-------------------------------|--------------------------|-------------------|---------------|----------------------------|
|                                                    |                               | MIC <sub>50</sub>        | MIC <sub>90</sub> | Range         |                            |
|                                                    | Ceftazidime                   | >128                     | >128              | 8 – >128      | 0                          |
|                                                    | Cefepime                      | >16                      | >16               | 1 – >16       | 1.9                        |
|                                                    | Aztreonam                     | 128                      | >128              | 0.25 – >128   | 18.5                       |
|                                                    | Piperacillin–tazobactam       | >128                     | >128              | 0.5 – >128    | 7.4                        |
|                                                    | Doripenem                     | >4                       | >4                | 1 – >4        | 1.9                        |
|                                                    | Imipenem                      | >8                       | >8                | 0.5 – >8      | 9.3                        |
|                                                    | Meropenem                     | >8                       | >8                | 2 – >8        | 0                          |
|                                                    | Amikacin                      | 8                        | >32               | 1 – >32       | 57.4                       |
|                                                    | Colistin (n=38) <sup>d</sup>  | 0.5                      | 4                 | 0.25 – >4     | 89.5                       |
|                                                    | Tigecycline                   | 1                        | 8                 | 0.12 – 8      | 77.8                       |
|                                                    | Levofloxacin                  | >4                       | >4                | 0.06 – >4     | 25.9                       |
| Meropenem-nonsusceptible, MBL–negative (20)        | Ceftazidime–avibactam         | 1                        | >128              | 0.06 – >128   | 80.0                       |
|                                                    | Ceftazidime                   | 128                      | >128              | 8 – >128      | 0                          |
|                                                    | Cefepime                      | >16                      | >16               | 8 – >16       | 0                          |
|                                                    | Aztreonam                     | 128                      | >128              | 0.5 – >128    | 5.0                        |
|                                                    | Piperacillin–tazobactam       | >128                     | >128              | 1 – >128      | 10.0                       |
|                                                    | Doripenem                     | >4                       | >4                | 1 – >4        | 5.0                        |
|                                                    | Imipenem                      | >8                       | >8                | 0.5 – >8      | 15.0                       |
|                                                    | Meropenem                     | >8                       | >8                | 2 – >8        | 0                          |
|                                                    | Amikacin                      | 4                        | >32               | 1 – >32       | 75.0                       |
|                                                    | Colistin (n=16) <sup>d</sup>  | 0.25                     | 4                 | 0.25 – >4     | 87.5                       |
|                                                    | Tigecycline                   | 1                        | 8                 | 0.5 – 8       | 75.0                       |
|                                                    | Levofloxacin                  | >4                       | >4                | 1 – >4        | 10.0                       |
| Colistin–resistant (30) <sup>e</sup>               | Ceftazidime–avibactam         | 0.25                     | 1                 | 0.06 – >128   | 93.3                       |
|                                                    | Ceftazidime                   | 16                       | >128              | 0.12 – >128   | 46.7                       |
|                                                    | Cefepime                      | ≤0.12                    | >16               | ≤0.12 – >16   | 76.7                       |
|                                                    | Aztreonam                     | 1                        | 128               | ≤0.015 – >128 | 56.7                       |
|                                                    | Piperacillin–tazobactam       | 8                        | 128               | 0.5 – >128    | 66.7                       |
|                                                    | Doripenem                     | 0.06                     | 4                 | 0.03 – >4     | 90.0                       |
|                                                    | Imipenem                      | 1                        | 2                 | 0.25 – >8     | 80.0                       |
|                                                    | Meropenem                     | 0.06                     | 0.25              | 0.015 – >8    | 90.0                       |
|                                                    | Amikacin                      | 2                        | 8                 | 1 – 32        | 96.7                       |
|                                                    | Colistin (n=30) <sup>d</sup>  | >4                       | >4                | 4 – >4        | 0                          |
|                                                    | Tigecycline                   | 0.5                      | 2                 | 0.12 – 8      | 93.3                       |
|                                                    | Levofloxacin                  | 0.12                     | >4                | ≤0.03 – >4    | 70.0                       |
| Colistin–resistant, MBL–negative (28) <sup>e</sup> | Ceftazidime–avibactam         | 0.25                     | 1                 | 0.06 – 2      | 100                        |
|                                                    | Ceftazidime                   | 8                        | 128               | 0.12 – >128   | 50.0                       |
|                                                    | Cefepime                      | ≤0.12                    | >16               | ≤0.12 – >16   | 78.6                       |
|                                                    | Aztreonam                     | 0.25                     | 128               | ≤0.015 – >128 | 57.1                       |
|                                                    | Piperacillin–tazobactam       | 4                        | 128               | 0.5 – >128    | 71.4                       |
|                                                    | Doripenem                     | 0.06                     | 0.25              | 0.03 – 4      | 96.4                       |
|                                                    | Imipenem                      | 1                        | 2                 | 0.25 – 4      | 85.7                       |
|                                                    | Meropenem                     | 0.06                     | 0.25              | 0.015 – 8     | 96.4                       |
|                                                    | Amikacin                      | 2                        | 8                 | 1 – 16        | 100                        |
|                                                    | Colistin (n=28) <sup>d</sup>  | >4                       | >4                | 4 – >4        | 0                          |
|                                                    | Tigecycline                   | 0.5                      | 2                 | 0.12 – 8      | 92.9                       |
|                                                    | Levofloxacin                  | 0.06                     | >4                | ≤0.03 – >4    | 75.0                       |
| Multidrug–resistant (229)                          | Ceftazidime–avibactam         | 0.5                      | >128              | 0.03 – >128   | 83.8                       |
|                                                    | Ceftazidime                   | 128                      | >128              | 0.5 – >128    | 1.3                        |
|                                                    | Cefepime                      | >16                      | >16               | ≤0.12 – >16   | 5.7                        |
|                                                    | Aztreonam                     | 64                       | >128              | 0.25 – >128   | 3.9                        |
|                                                    | Piperacillin–tazobactam       | 32                       | >128              | 0.5 – >128    | 42.4                       |
|                                                    | Doripenem                     | 0.06                     | >4                | 0.03 – >4     | 77.3                       |
|                                                    | Imipenem                      | 0.25                     | >8                | 0.06 – >8     | 77.3                       |
|                                                    | Meropenem                     | 0.06                     | >8                | 0.015 – >8    | 76.9                       |
|                                                    | Amikacin                      | 4                        | >32               | 0.5 – >32     | 86.5                       |
|                                                    | Colistin (n=125) <sup>d</sup> | 0.5                      | 4                 | 0.25 – >4     | 88.8                       |
|                                                    | Tigecycline                   | 0.5                      | 4                 | 0.06 – 8      | 89.1                       |
|                                                    | Levofloxacin                  | >4                       | >4                | 0.06 – >4     | 14.0                       |

| Phenotype/Organism (no. of isolates) <sup>a</sup> | Antimicrobial agent                  | MIC (µg/ml) <sup>b</sup> |                   |                 | % Susceptible <sup>c</sup> |
|---------------------------------------------------|--------------------------------------|--------------------------|-------------------|-----------------|----------------------------|
|                                                   |                                      | MIC <sub>50</sub>        | MIC <sub>90</sub> | Range           |                            |
| Multidrug-resistant, MBL-negative (196)           | Ceftazidime-avibactam                | 0.25                     | 1                 | 0.03 - >128     | 98.0                       |
|                                                   | Ceftazidime                          | 64                       | >128              | 0.5 - >128      | 1.5                        |
|                                                   | Cefepime                             | >16                      | >16               | ≤0.12 - >16     | 6.1                        |
|                                                   | Aztreonam                            | 64                       | >128              | 0.5 - >128      | 0.5                        |
|                                                   | Piperacillin-tazobactam              | 32                       | >128              | 0.5 - >128      | 48.5                       |
|                                                   | Doripenem                            | 0.06                     | 1                 | 0.03 - >4       | 90.3                       |
|                                                   | Imipenem                             | 0.25                     | 2                 | 0.06 - >8       | 89.8                       |
|                                                   | Meropenem                            | 0.06                     | 2                 | 0.015 - >8      | 89.8                       |
|                                                   | Amikacin                             | 4                        | 16                | 0.5 - >32       | 93.4                       |
|                                                   | Colistin (n=104) <sup>d</sup>        | 0.5                      | 4                 | 0.25 - >4       | 88.5                       |
|                                                   | Tigecycline                          | 0.5                      | 2                 | 0.06 - 8        | 90.8                       |
|                                                   | Levofloxacin                         | >4                       | >4                | 0.12 - >4       | 10.7                       |
|                                                   | <i>Escherichia coli</i> <sup>f</sup> |                          |                   |                 |                            |
| All (422)                                         | Ceftazidime-avibactam                | 0.12                     | 0.25              | ≤0.015 - >128   | 99.8                       |
|                                                   | Ceftazidime                          | 0.5                      | 64                | 0.03 - >128     | 63.0                       |
|                                                   | Cefepime                             | ≤0.12                    | >16               | ≤0.12 - >16     | 66.6                       |
|                                                   | Aztreonam                            | 0.25                     | 64                | ≤0.015 - >128   | 62.1                       |
|                                                   | Piperacillin-tazobactam              | 4                        | 16                | ≤0.25 - >128    | 91.0                       |
|                                                   | Doripenem                            | 0.03                     | 0.06              | 0.015 - >4      | 99.8                       |
|                                                   | Imipenem                             | 0.25                     | 0.5               | ≤0.03 - >8      | 99.3                       |
|                                                   | Meropenem                            | 0.03                     | 0.06              | 0.015 - >8      | 99.8                       |
|                                                   | Amikacin                             | 4                        | 8                 | 0.5 - >32       | 98.6                       |
|                                                   | Colistin (n=213) <sup>d</sup>        | 0.5                      | 1                 | 0.25 - 2        | 100                        |
|                                                   | Tigecycline                          | 0.25                     | 0.5               | 0.06 - 4        | 99.5                       |
|                                                   | Levofloxacin                         | >4                       | >4                | ≤0.03 - >4      | 45.7                       |
|                                                   | Ceftazidime-nonsusceptible (156)     | Ceftazidime-avibactam    | 0.12              | 0.5             | 0.03 - >128                |
| Ceftazidime                                       |                                      | 32                       | 128               | 8 - >128        | 0                          |
| Cefepime                                          |                                      | >16                      | >16               | ≤0.12 - >16     | 21.8                       |
| Aztreonam                                         |                                      | 32                       | 128               | 0.5 - >128      | 8.3                        |
| Piperacillin-tazobactam                           |                                      | 8                        | 128               | 0.5 - >128      | 82.7                       |
| Doripenem                                         |                                      | 0.03                     | 0.06              | 0.015 - >4      | 99.4                       |
| Imipenem                                          |                                      | 0.25                     | 1                 | ≤0.03 - >8      | 98.1                       |
| Meropenem                                         |                                      | 0.03                     | 0.06              | 0.015 - >8      | 99.4                       |
| Amikacin                                          |                                      | 4                        | 16                | 1 - >32         | 97.4                       |
| Colistin (n=79) <sup>d</sup>                      |                                      | 0.5                      | 1                 | 0.25 - 1        | 100                        |
| Tigecycline                                       |                                      | 0.25                     | 0.5               | 0.06 - 4        | 99.4                       |
| Levofloxacin                                      |                                      | >4                       | >4                | ≤0.03 - >4      | 21.2                       |
| Meropenem-nonsusceptible (1)                      |                                      | Ceftazidime-avibactam    | — <sup>b</sup>    | —               | >128                       |
|                                                   | Ceftazidime                          | —                        | —                 | >128            | 0                          |
|                                                   | Cefepime                             | —                        | —                 | >16             | 0                          |
|                                                   | Aztreonam                            | —                        | —                 | 128             | 0                          |
|                                                   | Piperacillin-tazobactam              | —                        | —                 | >128            | 0                          |
|                                                   | Doripenem                            | —                        | —                 | >4              | 0                          |
|                                                   | Imipenem                             | —                        | —                 | >8              | 0                          |
|                                                   | Meropenem                            | —                        | —                 | >8              | 0                          |
|                                                   | Amikacin                             | —                        | —                 | 4               | 100                        |
|                                                   | Colistin (n=0) <sup>d</sup>          | —                        | —                 | ND <sup>g</sup> | ND                         |
|                                                   | Tigecycline                          | —                        | —                 | 2               | 100                        |
|                                                   | Levofloxacin                         | —                        | —                 | >4              | 0                          |
|                                                   | Multidrug-resistant (96)             | Ceftazidime-avibactam    | 0.25              | 0.5             | 0.03 - >128                |
| Ceftazidime                                       |                                      | 32                       | >128              | 0.5 - >128      | 2.1                        |
| Cefepime                                          |                                      | >16                      | >16               | 0.25 - >16      | 5.2                        |
| Aztreonam                                         |                                      | 64                       | 128               | 16 - >128       | 0                          |
| Piperacillin-tazobactam                           |                                      | 8                        | 128               | 0.5 - >128      | 75.0                       |
| Doripenem                                         |                                      | 0.03                     | 0.12              | 0.03 - >4       | 99.0                       |
| Imipenem                                          |                                      | 0.25                     | 0.5               | 0.06 - >8       | 99.0                       |
| Meropenem                                         |                                      | 0.03                     | 0.06              | 0.015 - >8      | 99.0                       |
| Amikacin                                          |                                      | 4                        | 16                | 1 - >32         | 95.8                       |
| Colistin (n=44) <sup>d</sup>                      |                                      | 0.5                      | 1                 | 0.25 - 1        | 100                        |
| Tigecycline                                       |                                      | 0.25                     | 0.5               | 0.06 - 4        | 99.0                       |



| Phenotype/Organism (no. of isolates) <sup>a</sup> | Antimicrobial agent           | MIC (µg/ml) <sup>b</sup> |                   |               | % Susceptible <sup>c</sup> |
|---------------------------------------------------|-------------------------------|--------------------------|-------------------|---------------|----------------------------|
|                                                   |                               | MIC <sub>50</sub>        | MIC <sub>90</sub> | Range         |                            |
|                                                   | Levofloxacin                  | >4                       | >4                | 0.5 – >4      | 1.0                        |
| <i>Klebsiella pneumoniae</i>                      |                               |                          |                   |               |                            |
| All (405)                                         | Ceftazidime–avibactam         | 0.12                     | 1                 | ≤0.015 – >128 | 94.6                       |
|                                                   | Ceftazidime                   | 1                        | >128              | 0.03 – >128   | 52.4                       |
|                                                   | Cefepime                      | ≤0.12                    | >16               | ≤0.12 – >16   | 62.0                       |
|                                                   | Aztreonam                     | 0.25                     | 128               | ≤0.015 – >128 | 55.1                       |
|                                                   | Piperacillin–tazobactam       | 8                        | >128              | 0.5 – >128    | 71.1                       |
|                                                   | Doripenem                     | 0.06                     | 0.25              | 0.015 – >4    | 91.1                       |
|                                                   | Imipenem                      | 0.25                     | 2                 | 0.06 – >8     | 89.1                       |
|                                                   | Meropenem                     | 0.03                     | 0.25              | 0.015 – >8    | 91.1                       |
|                                                   | Amikacin                      | 1                        | 8                 | ≤0.25 – >32   | 94.3                       |
|                                                   | Colistin (n=219) <sup>d</sup> | 1                        | 1                 | ≤0.12 – >4    | 96.4                       |
|                                                   | Tigecycline                   | 0.5                      | 2                 | 0.06 – 8      | 93.1                       |
|                                                   | Levofloxacin                  | 0.5                      | >4                | ≤0.03 – >4    | 70.4                       |
| All, MBL–negative (386)                           | Ceftazidime–avibactam         | 0.12                     | 0.5               | ≤0.015 – >128 | 99.2                       |
|                                                   | Ceftazidime                   | 0.5                      | 128               | 0.03 – >128   | 54.9                       |
|                                                   | Cefepime                      | ≤0.12                    | >16               | ≤0.12 – >16   | 65.0                       |
|                                                   | Aztreonam                     | 0.25                     | 128               | ≤0.015 – >128 | 57.3                       |
|                                                   | Piperacillin–tazobactam       | 4                        | >128              | 0.5 – >128    | 74.4                       |
|                                                   | Doripenem                     | 0.06                     | 0.12              | 0.015 – >4    | 95.6                       |
|                                                   | Imipenem                      | 0.25                     | 1                 | 0.06 – >8     | 93.0                       |
|                                                   | Meropenem                     | 0.03                     | 0.12              | 0.015 – >8    | 95.6                       |
|                                                   | Amikacin                      | 1                        | 4                 | ≤0.25 – >32   | 97.4                       |
|                                                   | Colistin (n=208) <sup>d</sup> | 1                        | 1                 | 0.12 – >4     | 96.6                       |
|                                                   | Tigecycline                   | 0.5                      | 2                 | 0.06 – 8      | 93.0                       |
|                                                   | Levofloxacin                  | 0.5                      | >4                | ≤0.03 – >4    | 71.2                       |
| Ceftazidime-nonsusceptible (193)                  | Ceftazidime–avibactam         | 0.25                     | 128               | 0.06 – >128   | 88.6                       |
|                                                   | Ceftazidime                   | 64                       | >128              | 8 – >128      | 0                          |
|                                                   | Cefepime                      | >16                      | >16               | ≤0.12 – >16   | 23.3                       |
|                                                   | Aztreonam                     | 64                       | >128              | 0.25 – >128   | 7.3                        |
|                                                   | Piperacillin–tazobactam       | 32                       | >128              | 0.5 – >128    | 43.5                       |
|                                                   | Doripenem                     | 0.06                     | >4                | 0.03 – >4     | 81.9                       |
|                                                   | Imipenem                      | 0.25                     | 8                 | 0.06 – >8     | 78.8                       |
|                                                   | Meropenem                     | 0.06                     | >8                | 0.015 – >8    | 81.4                       |
|                                                   | Amikacin                      | 2                        | 32                | ≤0.25 – >32   | 89.1                       |
|                                                   | Colistin (n=110) <sup>d</sup> | 1                        | 2                 | 0.25 – >4     | 92.7                       |
|                                                   | Tigecycline                   | 1                        | 4                 | 0.06 – 8      | 88.6                       |
|                                                   | Levofloxacin                  | 4                        | >4                | ≤0.03 – >4    | 47.7                       |
| Ceftazidime-nonsusceptible, MBL–negative (174)    | Ceftazidime–avibactam         | 0.25                     | 1                 | 0.06 – >128   | 98.3                       |
|                                                   | Ceftazidime                   | 64                       | >128              | 8 – >128      | 0                          |
|                                                   | Cefepime                      | 16                       | >16               | ≤0.12 – >16   | 25.9                       |
|                                                   | Aztreonam                     | 64                       | >128              | 0.5 – >128    | 6.9                        |
|                                                   | Piperacillin–tazobactam       | 32                       | >128              | 0.5 – >128    | 47.7                       |
|                                                   | Doripenem                     | 0.06                     | 1                 | 0.03 – >4     | 90.8                       |
|                                                   | Imipenem                      | 0.25                     | 2                 | 0.06 – >8     | 86.2                       |
|                                                   | Meropenem                     | 0.06                     | 0.5               | 0.015 – >8    | 90.2                       |
|                                                   | Amikacin                      | 2                        | 8                 | ≤0.25 – >32   | 95.4                       |
|                                                   | Colistin (n=99) <sup>d</sup>  | 1                        | 2                 | 0.25 – >4     | 92.9                       |
|                                                   | Tigecycline                   | 1                        | 4                 | 0.06 – 8      | 87.9                       |
|                                                   | Levofloxacin                  | 4                        | >4                | ≤0.03 – >4    | 47.1                       |
| Meropenem-nonsusceptible (36)                     | Ceftazidime–avibactam         | >128                     | >128              | 0.12 – >128   | 38.9                       |
|                                                   | Ceftazidime                   | >128                     | >128              | 16 – >128     | 0                          |
|                                                   | Cefepime                      | >16                      | >16               | 4 – >16       | 0                          |
|                                                   | Aztreonam                     | 128                      | >128              | 0.25 – >128   | 5.6                        |
|                                                   | Piperacillin–tazobactam       | >128                     | >128              | 4 – >128      | 5.6                        |
|                                                   | Doripenem                     | >4                       | >4                | 1 – >4        | 2.8                        |
|                                                   | Imipenem                      | 8                        | >8                | 0.5 – >8      | 11.1                       |
|                                                   | Meropenem                     | >8                       | >8                | 2 – >8        | 0                          |
|                                                   | Amikacin                      | 8                        | >32               | 1 – >32       | 52.8                       |

| Phenotype/Organism (no. of isolates) <sup>a</sup> | Antimicrobial agent          | MIC (µg/ml) <sup>b</sup> |                   |             | % Susceptible <sup>c</sup> |
|---------------------------------------------------|------------------------------|--------------------------|-------------------|-------------|----------------------------|
|                                                   |                              | MIC <sub>50</sub>        | MIC <sub>90</sub> | Range       |                            |
|                                                   | Colistin (n=26) <sup>d</sup> | 1                        | 2                 | 0.25 – >4   | 92.3                       |
|                                                   | Tigecycline                  | 1                        | 8                 | 0.12 – 8    | 83.3                       |
|                                                   | Levofloxacin                 | >4                       | >4                | 0.06 – >4   | 33.3                       |
| Meropenem-nonsusceptible, MBL-negative (17)       | Ceftazidime-avibactam        | 1                        | >128              | 0.12 – >128 | 82.4                       |
|                                                   | Ceftazidime                  | >128                     | >128              | 16 – >128   | 0                          |
|                                                   | Cefepime                     | >16                      | >16               | 8 – >16     | 0                          |
|                                                   | Aztreonam                    | >128                     | >128              | 64 – >128   | 0                          |
|                                                   | Piperacillin-tazobactam      | >128                     | >128              | 16 – >128   | 5.9                        |
|                                                   | Doripenem                    | >4                       | >4                | 1 – >4      | 5.9                        |
|                                                   | Imipenem                     | >8                       | >8                | 0.5 – >8    | 11.8                       |
|                                                   | Meropenem                    | >8                       | >8                | 2 – >8      | 0                          |
|                                                   | Amikacin                     | 8                        | >32               | 1 – >32     | 76.5                       |
|                                                   | Colistin (n=15) <sup>d</sup> | 0.25                     | 1                 | 0.25 – 4    | 93.3                       |
|                                                   | Tigecycline                  | 1                        | 8                 | 0.5 – 8     | 70.6                       |
|                                                   | Levofloxacin                 | >4                       | >4                | 1 – >4      | 11.8                       |
|                                                   | Colistin-resistant (8)       | Ceftazidime-avibactam    | — <sup>b</sup>    | —           | 0.12 – >128                |
| Ceftazidime                                       |                              | —                        | —                 | 8 – >128    | 0                          |
| Cefepime                                          |                              | —                        | —                 | ≤0.12 – >16 | 37.5                       |
| Aztreonam                                         |                              | —                        | —                 | 2 – >128    | 25.0                       |
| Piperacillin-tazobactam                           |                              | —                        | —                 | 0.5 – >128  | 50.0                       |
| Doripenem                                         |                              | —                        | —                 | 0.03 – >4   | 75.0                       |
| Imipenem                                          |                              | —                        | —                 | 0.25 – >8   | 62.5                       |
| Meropenem                                         |                              | —                        | —                 | 0.03 – >8   | 75.0                       |
| Amikacin                                          |                              | —                        | —                 | 1 – 32      | 87.5                       |
| Colistin (n=8) <sup>d</sup>                       |                              | —                        | —                 | 4 – >4      | 0                          |
| Tigecycline                                       |                              | —                        | —                 | 0.5 – 8     | 75.0                       |
| Levofloxacin                                      |                              | —                        | —                 | 2 – >4      | 12.5                       |
| Colistin-resistant, MBL-negative (7)              |                              | Ceftazidime-avibactam    | — <sup>b</sup>    | —           | 0.12 – 2                   |
|                                                   | Ceftazidime                  | —                        | —                 | 8 – >128    | 0                          |
|                                                   | Cefepime                     | —                        | —                 | ≤0.12 – >16 | 42.9                       |
|                                                   | Aztreonam                    | —                        | —                 | 2 – >128    | 28.6                       |
|                                                   | Piperacillin-tazobactam      | —                        | —                 | 0.5 – >128  | 57.1                       |
|                                                   | Doripenem                    | —                        | —                 | 0.03 – 4    | 85.7                       |
|                                                   | Imipenem                     | —                        | —                 | 0.25 – 2    | 71.4                       |
|                                                   | Meropenem                    | —                        | —                 | 0.03 – 8    | 85.7                       |
|                                                   | Amikacin                     | —                        | —                 | 1 – 8       | 100                        |
|                                                   | Colistin (n=7) <sup>d</sup>  | —                        | —                 | 4 – >4      | 0                          |
|                                                   | Tigecycline                  | —                        | —                 | 0.5 – 8     | 71.4                       |
|                                                   | Levofloxacin                 | —                        | —                 | 2 – >4      | 14.3                       |
|                                                   | Multidrug-resistant (100)    | Ceftazidime-avibactam    | 0.5               | >128        | 0.06 – >128                |
| Ceftazidime                                       |                              | 128                      | >128              | 1 – >128    | 1.0                        |
| Cefepime                                          |                              | >16                      | >16               | ≤0.12 – >16 | 3.0                        |
| Aztreonam                                         |                              | 128                      | >128              | 0.25 – >128 | 1.0                        |
| Piperacillin-tazobactam                           |                              | >128                     | >128              | 0.5 – >128  | 21.0                       |
| Doripenem                                         |                              | 0.12                     | >4                | 0.03 – >4   | 66.0                       |
| Imipenem                                          |                              | 0.5                      | >8                | 0.06 – >8   | 66.0                       |
| Meropenem                                         |                              | 0.06                     | >8                | 0.03 – >8   | 65.0                       |
| Amikacin                                          |                              | 4                        | >32               | 0.5 – >32   | 79.0                       |
| Colistin (n=60) <sup>d</sup>                      |                              | 1                        | 2                 | 0.25 – >4   | 90.0                       |
| Tigecycline                                       |                              | 1                        | 4                 | 0.12 – 8    | 84.0                       |
| Levofloxacin                                      |                              | >4                       | >4                | 0.06 – >4   | 23.0                       |
| Multidrug-resistant, MBL-negative (82)            |                              | Ceftazidime-avibactam    | 0.5               | 1           | 0.06 – >128                |
|                                                   | Ceftazidime                  | 128                      | >128              | 1 – >128    | 1.2                        |
|                                                   | Cefepime                     | >16                      | >16               | ≤0.12 – >16 | 3.7                        |
|                                                   | Aztreonam                    | 128                      | >128              | 16 – >128   | 0                          |
|                                                   | Piperacillin-tazobactam      | 128                      | >128              | 0.5 – >128  | 24.4                       |
|                                                   | Doripenem                    | 0.06                     | >4                | 0.03 – >4   | 80.5                       |
|                                                   | Imipenem                     | 0.25                     | >8                | 0.06 – >8   | 79.3                       |
|                                                   | Meropenem                    | 0.06                     | >8                | 0.03 – >8   | 79.3                       |

| Phenotype/Organism (no. of isolates) <sup>a</sup> | Antimicrobial agent          | MIC (µg/ml) <sup>b</sup> |                   |               | % Susceptible <sup>c</sup> |
|---------------------------------------------------|------------------------------|--------------------------|-------------------|---------------|----------------------------|
|                                                   |                              | MIC <sub>50</sub>        | MIC <sub>90</sub> | Range         |                            |
|                                                   | Amikacin                     | 4                        | 16                | 0.5 – >32     | 90.2                       |
|                                                   | Colistin (n=50) <sup>d</sup> | 1                        | 2                 | 0.25 – >4     | 90.0                       |
|                                                   | Tigecycline                  | 1                        | 4                 | 0.25 – 8      | 81.7                       |
|                                                   | Levofloxacin                 | >4                       | >4                | 0.5 – >4      | 17.1                       |
| <hr/>                                             |                              |                          |                   |               |                            |
| <i>Klebsiella oxytoca</i> <sup>f</sup>            |                              |                          |                   |               |                            |
| All (36)                                          | Ceftazidime–avibactam        | 0.12                     | 0.25              | 0.03 – 1      | 100                        |
|                                                   | Ceftazidime                  | 0.12                     | 64                | 0.03 – 128    | 75.0                       |
|                                                   | Cefepime                     | ≤0.12                    | 4                 | ≤0.12 – >16   | 86.1                       |
|                                                   | Aztreonam                    | 0.25                     | 32                | ≤0.015 – >128 | 69.4                       |
|                                                   | Piperacillin–tazobactam      | 2                        | 64                | 1 – >128      | 88.9                       |
|                                                   | Doripenem                    | 0.06                     | 0.12              | 0.03 – 0.12   | 100                        |
|                                                   | Imipenem                     | 0.25                     | 0.5               | 0.12 – 1      | 100                        |
|                                                   | Meropenem                    | 0.03                     | 0.06              | 0.03 – 0.12   | 100                        |
|                                                   | Amikacin                     | 2                        | 8                 | 0.5 – 8       | 100                        |
|                                                   | Colistin (n=21) <sup>d</sup> | 0.5                      | 1                 | 0.25 – 2      | 100                        |
|                                                   | Tigecycline                  | 0.25                     | 1                 | 0.06 – 2      | 100                        |
|                                                   | Levofloxacin                 | 0.06                     | 2                 | ≤0.03 – >4    | 91.7                       |
| Ceftazidime-nonsusceptible (9)                    | Ceftazidime–avibactam        | — <sup>b</sup>           | —                 | 0.06 – 1      | 100                        |
|                                                   | Ceftazidime                  | —                        | —                 | 8 – 128       | 0                          |
|                                                   | Cefepime                     | —                        | —                 | ≤0.12 – >16   | 44.4                       |
|                                                   | Aztreonam                    | —                        | —                 | 8 – >128      | 0                          |
|                                                   | Piperacillin–tazobactam      | —                        | —                 | 2 – >128      | 77.8                       |
|                                                   | Doripenem                    | —                        | —                 | 0.03 – 0.12   | 100                        |
|                                                   | Imipenem                     | —                        | —                 | 0.12 – 1      | 100                        |
|                                                   | Meropenem                    | —                        | —                 | 0.03 – 0.12   | 100                        |
|                                                   | Amikacin                     | —                        | —                 | 1 – 8         | 100                        |
|                                                   | Colistin (n=7) <sup>d</sup>  | —                        | —                 | 0.25 – 1      | 100                        |
|                                                   | Tigecycline                  | —                        | —                 | 0.25 – 1      | 100                        |
|                                                   | Levofloxacin                 | —                        | —                 | 0.25 – >4     | 77.8                       |
| Multidrug-resistant (1)                           | Ceftazidime–avibactam        | — <sup>b</sup>           | —                 | 1             | 100                        |
|                                                   | Ceftazidime                  | —                        | —                 | 128           | 0                          |
|                                                   | Cefepime                     | —                        | —                 | >16           | 0                          |
|                                                   | Aztreonam                    | —                        | —                 | >128          | 0                          |
|                                                   | Piperacillin–tazobactam      | —                        | —                 | >128          | 0                          |
|                                                   | Doripenem                    | —                        | —                 | 0.12          | 100                        |
|                                                   | Imipenem                     | —                        | —                 | 0.5           | 100                        |
|                                                   | Meropenem                    | —                        | —                 | 0.12          | 100                        |
|                                                   | Amikacin                     | —                        | —                 | 8             | 100                        |
|                                                   | Colistin (n=1) <sup>d</sup>  | —                        | —                 | 0.25          | 100                        |
|                                                   | Tigecycline                  | —                        | —                 | 1             | 100                        |
|                                                   | Levofloxacin                 | —                        | —                 | >4            | 0                          |
| <hr/>                                             |                              |                          |                   |               |                            |
| <i>Enterobacter</i> spp.                          |                              |                          |                   |               |                            |
| All (160) <sup>h</sup>                            | Ceftazidime–avibactam        | 0.25                     | 1                 | ≤0.015 – >128 | 92.5                       |
|                                                   | Ceftazidime                  | 1                        | 128               | ≤0.015 – >128 | 56.3                       |
|                                                   | Cefepime                     | ≤0.12                    | >16               | ≤0.12 – >16   | 75.6                       |
|                                                   | Aztreonam                    | 0.25                     | 64                | ≤0.015 – >128 | 58.8                       |
|                                                   | Piperacillin–tazobactam      | 4                        | 128               | ≤0.25 – >128  | 69.4                       |
|                                                   | Doripenem                    | 0.06                     | 0.25              | 0.015 – >4    | 92.5                       |
|                                                   | Imipenem                     | 1                        | 2                 | 0.12 – >8     | 81.9                       |
|                                                   | Meropenem                    | 0.06                     | 0.12              | 0.015 – >8    | 92.5                       |
|                                                   | Amikacin                     | 2                        | 4                 | ≤0.25 – >32   | 96.9                       |
|                                                   | Colistin (n=89) <sup>d</sup> | 0.5                      | >4                | ≤0.12 – >4    | 75.3                       |
|                                                   | Tigecycline                  | 0.5                      | 1                 | 0.06 – 8      | 95.6                       |
|                                                   | Levofloxacin                 | 0.06                     | >4                | ≤0.03 – >4    | 83.8                       |
| All, MBL–negative (148)                           | Ceftazidime–avibactam        | 0.25                     | 0.5               | ≤0.015 – 1    | 100                        |
|                                                   | Ceftazidime                  | 0.5                      | 128               | ≤0.015 – >128 | 60.8                       |
|                                                   | Cefepime                     | ≤0.12                    | 16                | ≤0.12 – >16   | 81.1                       |
|                                                   | Aztreonam                    | 0.12                     | 64                | ≤0.015 – >128 | 60.8                       |
|                                                   | Piperacillin–tazobactam      | 4                        | 128               | ≤0.25 – >128  | 75.0                       |

| Phenotype/Organism (no. of isolates) <sup>a</sup> | Antimicrobial agent          | MIC (µg/ml) <sup>b</sup> |                   |              | % Susceptible <sup>c</sup> |
|---------------------------------------------------|------------------------------|--------------------------|-------------------|--------------|----------------------------|
|                                                   |                              | MIC <sub>50</sub>        | MIC <sub>90</sub> | Range        |                            |
|                                                   | Doripenem                    | 0.06                     | 0.25              | 0.015 – 0.5  | 100                        |
|                                                   | Imipenem                     | 0.5                      | 2                 | 0.12 – 4     | 88.5                       |
|                                                   | Meropenem                    | 0.06                     | 0.12              | 0.015 – 0.25 | 100                        |
|                                                   | Amikacin                     | 2                        | 4                 | ≤0.25 – >32  | 99.3                       |
|                                                   | Colistin (n=80) <sup>d</sup> | 1                        | >4                | ≤0.12 – >4   | 73.8                       |
|                                                   | Tigecycline                  | 0.5                      | 1                 | 0.06 – 4     | 99.3                       |
|                                                   | Levofloxacin                 | 0.06                     | 2                 | ≤0.03 – >4   | 90.5                       |
| Ceftazidime-nonsusceptible (70)                   | Ceftazidime–avibactam        | 0.5                      | >128              | 0.06 – >128  | 82.9                       |
|                                                   | Ceftazidime                  | 64                       | >128              | 8 – >128     | 0                          |
|                                                   | Cefepime                     | 4                        | >16               | ≤0.12 – >16  | 45.7                       |
|                                                   | Aztreonam                    | 32                       | 128               | 0.25 – >128  | 10.0                       |
|                                                   | Piperacillin–tazobactam      | 32                       | >128              | 2 – >128     | 30.0                       |
|                                                   | Doripenem                    | 0.12                     | >4                | 0.03 – >4    | 82.9                       |
|                                                   | Imipenem                     | 1                        | >8                | 0.25 – >8    | 80.0                       |
|                                                   | Meropenem                    | 0.06                     | >8                | 0.015 – >8   | 82.9                       |
|                                                   | Amikacin                     | 2                        | 8                 | 0.5 – >32    | 92.9                       |
|                                                   | Colistin (n=43) <sup>d</sup> | 0.5                      | >4                | 0.25 – >4    | 81.4                       |
|                                                   | Tigecycline                  | 0.5                      | 2                 | 0.12 – 8     | 90.0                       |
|                                                   | Levofloxacin                 | 1                        | >4                | ≤0.03 – >4   | 65.7                       |
| Ceftazidime-nonsusceptible, MBL–negative (58)     | Ceftazidime–avibactam        | 0.5                      | 1                 | 0.06 – 1     | 100                        |
|                                                   | Ceftazidime                  | 64                       | 128               | 8 – >128     | 0                          |
|                                                   | Cefepime                     | 2                        | >16               | ≤0.12 – >16  | 53.5                       |
|                                                   | Aztreonam                    | 32                       | 128               | 0.5 – >128   | 5.2                        |
|                                                   | Piperacillin–tazobactam      | 32                       | 128               | 2 – >128     | 36.2                       |
|                                                   | Doripenem                    | 0.12                     | 0.25              | 0.03 – 0.5   | 100                        |
|                                                   | Imipenem                     | 0.5                      | 1                 | 0.25 – 2     | 96.6                       |
|                                                   | Meropenem                    | 0.06                     | 0.12              | 0.015 – 0.25 | 100                        |
|                                                   | Amikacin                     | 2                        | 4                 | 0.5 – >32    | 98.3                       |
|                                                   | Colistin (n=34) <sup>d</sup> | 0.5                      | >4                | 0.25 – >4    | 79.4                       |
|                                                   | Tigecycline                  | 0.5                      | 2                 | 0.12 – 4     | 98.3                       |
|                                                   | Levofloxacin                 | 1                        | >4                | ≤0.03 – >4   | 79.3                       |
| Meropenem-nonsusceptible (12) <sup>f</sup>        | Ceftazidime–avibactam        | >128                     | >128              | 32 – >128    | 0                          |
|                                                   | Ceftazidime                  | >128                     | >128              | >128 – >128  | 0                          |
|                                                   | Cefepime                     | >16                      | >16               | 1 – >16      | 8.3                        |
|                                                   | Aztreonam                    | 128                      | 128               | 0.25 – >128  | 33.3                       |
|                                                   | Piperacillin–tazobactam      | >128                     | >128              | 64 – >128    | 0                          |
|                                                   | Doripenem                    | >4                       | >4                | 4 – >4       | 0                          |
|                                                   | Imipenem                     | >8                       | >8                | 2 – >8       | 0                          |
|                                                   | Meropenem                    | >8                       | >8                | 2 – >8       | 0                          |
|                                                   | Amikacin                     | 4                        | >32               | 2 – >32      | 66.7                       |
|                                                   | Colistin (n=9) <sup>d</sup>  | — <sup>b</sup>           | —                 | 0.5 – >4     | 88.9                       |
|                                                   | Tigecycline                  | 4                        | 8                 | 0.5 – 8      | 50.0                       |
|                                                   | Levofloxacin                 | >4                       | >4                | >4 – >4      | 0                          |
| Colistin–resistant (22)                           | Ceftazidime–avibactam        | 0.25                     | 1                 | 0.06 – >128  | 95.5                       |
|                                                   | Ceftazidime                  | 0.5                      | 128               | 0.12 – >128  | 63.6                       |
|                                                   | Cefepime                     | ≤0.12                    | 2                 | ≤0.12 – >16  | 90.9                       |
|                                                   | Aztreonam                    | 0.12                     | 32                | ≤0.015 – 64  | 68.2                       |
|                                                   | Piperacillin–tazobactam      | 4                        | 128               | 0.5 – >128   | 72.7                       |
|                                                   | Doripenem                    | 0.06                     | 0.25              | 0.03 – >4    | 95.5                       |
|                                                   | Imipenem                     | 1                        | 2                 | 0.25 – >8    | 86.4                       |
|                                                   | Meropenem                    | 0.06                     | 0.25              | 0.015 – >8   | 95.5                       |
|                                                   | Amikacin                     | 2                        | 4                 | 1 – 16       | 100                        |
|                                                   | Colistin (n=22) <sup>d</sup> | >4                       | >4                | >4 – >4      | 0                          |
|                                                   | Tigecycline                  | 0.5                      | 2                 | 0.12 – 2     | 100                        |
|                                                   | Levofloxacin                 | 0.06                     | 1                 | ≤0.03 – >4   | 90.9                       |
| Colistin–resistant, MBL–negative (21)             | Ceftazidime–avibactam        | 0.25                     | 0.5               | 0.06 – 1     | 100                        |
|                                                   | Ceftazidime                  | 0.5                      | 128               | 0.12 – 128   | 66.7                       |
|                                                   | Cefepime                     | ≤0.12                    | 2                 | ≤0.12 – >16  | 90.5                       |
|                                                   | Aztreonam                    | 0.12                     | 32                | ≤0.015 – 64  | 66.7                       |

| Phenotype/Organism (no. of isolates) <sup>a</sup> | Antimicrobial agent                    | MIC ( $\mu\text{g/ml}$ ) <sup>b</sup> |                   |                     | % Susceptible <sup>c</sup> |      |
|---------------------------------------------------|----------------------------------------|---------------------------------------|-------------------|---------------------|----------------------------|------|
|                                                   |                                        | MIC <sub>50</sub>                     | MIC <sub>90</sub> | Range               |                            |      |
|                                                   | Piperacillin–tazobactam                | 4                                     | 64                | 0.5 – 128           | 76.2                       |      |
|                                                   | Doripenem                              | 0.06                                  | 0.25              | 0.03 – 0.5          | 100                        |      |
|                                                   | Imipenem                               | 1                                     | 1                 | 0.25 – 4            | 90.5                       |      |
|                                                   | Meropenem                              | 0.06                                  | 0.25              | 0.015 – 0.25        | 100                        |      |
|                                                   | Amikacin                               | 2                                     | 4                 | 1 – 16              | 100                        |      |
|                                                   | Colistin (n=21) <sup>d</sup>           | >4                                    | >4                | >4 – >4             | 0                          |      |
|                                                   | Tigecycline                            | 0.5                                   | 2                 | 0.12 – 2            | 100                        |      |
|                                                   | Levofloxacin                           | 0.06                                  | 0.5               | $\leq$ 0.03 – >4    | 95.2                       |      |
| Multidrug-resistant (23)                          | Ceftazidime–avibactam                  | 32                                    | >128              | 0.12 – >128         | 47.8                       |      |
|                                                   | Ceftazidime                            | >128                                  | >128              | 16 – >128           | 0                          |      |
|                                                   | Cefepime                               | >16                                   | >16               | 0.5 – >16           | 21.7                       |      |
|                                                   | Aztreonam                              | 64                                    | 128               | 0.25 – >128         | 17.4                       |      |
|                                                   | Piperacillin–tazobactam                | 128                                   | >128              | 8 – >128            | 8.7                        |      |
|                                                   | Doripenem                              | 4                                     | >4                | 0.06 – >4           | 47.8                       |      |
|                                                   | Imipenem                               | 2                                     | >8                | 0.25 – >8           | 47.8                       |      |
|                                                   | Meropenem                              | 2                                     | >8                | 0.06 – >8           | 47.8                       |      |
|                                                   | Amikacin                               | 4                                     | >32               | 0.5 – >32           | 82.6                       |      |
|                                                   | Colistin (n=15) <sup>d</sup>           | 0.5                                   | >4                | 0.25 – >4           | 66.7                       |      |
|                                                   | Tigecycline                            | 1                                     | 4                 | 0.5 – 8             | 69.6                       |      |
|                                                   | Levofloxacin                           | >4                                    | >4                | 0.12 – >4           | 13.0                       |      |
|                                                   | Multidrug-resistant, MBL-negative (11) | Ceftazidime–avibactam                 | 0.5               | 1                   | 0.12 – 1                   | 100  |
| Ceftazidime                                       |                                        | 128                                   | 128               | 16 – >128           | 0                          |      |
| Cefepime                                          |                                        | >16                                   | >16               | 0.5 – >16           | 36.4                       |      |
| Aztreonam                                         |                                        | 32                                    | 128               | 32 – >128           | 0                          |      |
| Piperacillin–tazobactam                           |                                        | 32                                    | 128               | 8 – 128             | 18.2                       |      |
| Doripenem                                         |                                        | 0.12                                  | 0.25              | 0.06 – 0.25         | 100                        |      |
| Imipenem                                          |                                        | 1                                     | 1                 | 0.25 – 1            | 100                        |      |
| Meropenem                                         |                                        | 0.06                                  | 0.25              | 0.06 – 0.25         | 100                        |      |
| Amikacin                                          |                                        | 4                                     | 8                 | 0.5 – 16            | 100                        |      |
| Colistin (n=6) <sup>d</sup>                       |                                        | — <sup>b</sup>                        | —                 | 0.25 – >4           | 33.3                       |      |
| Tigecycline                                       |                                        | 1                                     | 2                 | 0.5 – 4             | 90.9                       |      |
| Levofloxacin                                      |                                        | >4                                    | >4                | 0.12 – >4           | 27.3                       |      |
| <i>Citrobacter</i> spp.                           |                                        |                                       |                   |                     |                            |      |
| All (71) <sup>i</sup>                             | Ceftazidime–avibactam                  | 0.12                                  | 0.5               | $\leq$ 0.015 – >128 | 97.2                       |      |
|                                                   | Ceftazidime                            | 0.25                                  | 64                | 0.06 – >128         | 74.7                       |      |
|                                                   | Cefepime                               | $\leq$ 0.12                           | >16               | $\leq$ 0.12 – >16   | 83.1                       |      |
|                                                   | Aztreonam                              | 0.06                                  | 64                | $\leq$ 0.015 – >128 | 77.5                       |      |
|                                                   | Piperacillin–tazobactam                | 4                                     | 64                | 0.5 – >128          | 84.5                       |      |
|                                                   | Doripenem                              | 0.06                                  | 0.06              | $\leq$ 0.008 – >4   | 95.8                       |      |
|                                                   | Imipenem                               | 0.25                                  | 1                 | 0.12 – >8           | 93.0                       |      |
|                                                   | Meropenem                              | 0.03                                  | 0.06              | 0.015 – >8          | 95.8                       |      |
|                                                   | Amikacin                               | 1                                     | 4                 | 0.5 – >32           | 97.2                       |      |
|                                                   | Colistin (n=35) <sup>d</sup>           | 0.5                                   | 1                 | 0.25 – 2            | 100                        |      |
|                                                   | Tigecycline                            | 0.25                                  | 0.5               | 0.06 – 1            | 100                        |      |
|                                                   | Levofloxacin                           | 0.06                                  | 1                 | $\leq$ 0.03 – >4    | 93.0                       |      |
|                                                   | All, MBL-negative (69)                 | Ceftazidime–avibactam                 | 0.12              | 0.5                 | $\leq$ 0.015 – 0.5         | 100  |
|                                                   |                                        | Ceftazidime                           | 0.25              | 64                  | 0.06 – >128                | 76.8 |
| Cefepime                                          |                                        | $\leq$ 0.12                           | >16               | $\leq$ 0.12 – >16   | 85.5                       |      |
| Aztreonam                                         |                                        | 0.06                                  | 64                | $\leq$ 0.015 – >128 | 76.8                       |      |
| Piperacillin–tazobactam                           |                                        | 4                                     | 64                | 0.5 – >128          | 87.0                       |      |
| Doripenem                                         |                                        | 0.06                                  | 0.06              | $\leq$ 0.008 – 4    | 98.6                       |      |
| Imipenem                                          |                                        | 0.25                                  | 1                 | 0.12 – 2            | 95.7                       |      |
| Meropenem                                         |                                        | 0.03                                  | 0.06              | 0.015 – 4           | 98.6                       |      |
| Amikacin                                          |                                        | 1                                     | 8                 | 0.5 – >32           | 97.1                       |      |
| Colistin (n=33) <sup>d</sup>                      |                                        | 0.5                                   | 1                 | 0.25 – 2            | 100                        |      |
| Tigecycline                                       |                                        | 0.25                                  | 0.5               | 0.06 – 1            | 100                        |      |
| Levofloxacin                                      |                                        | 0.06                                  | 1                 | $\leq$ 0.03 – >4    | 92.8                       |      |
| Ceftazidime-nonsusceptible (18)                   |                                        | Ceftazidime–avibactam                 | 0.25              | >128                | 0.12 – >128                | 88.9 |
|                                                   | Ceftazidime                            | 64                                    | >128              | 32 – >128           | 0                          |      |

| Phenotype/Organism (no. of isolates) <sup>a</sup> | Antimicrobial agent         | MIC (µg/ml) <sup>b</sup> |                   |                 | % Susceptible <sup>c</sup> |
|---------------------------------------------------|-----------------------------|--------------------------|-------------------|-----------------|----------------------------|
|                                                   |                             | MIC <sub>50</sub>        | MIC <sub>90</sub> | Range           |                            |
|                                                   | Cefepime                    | 16                       | >16               | 0.5 – >16       | 33.3                       |
|                                                   | Aztreonam                   | 64                       | 128               | 0.5 – >128      | 11.1                       |
|                                                   | Piperacillin–tazobactam     | 32                       | >128              | 2 – >128        | 44.4                       |
|                                                   | Doripenem                   | 0.06                     | >4                | 0.03 – >4       | 83.3                       |
|                                                   | Imipenem                    | 0.5                      | 8                 | 0.25 – >8       | 83.3                       |
|                                                   | Meropenem                   | 0.06                     | >8                | 0.03 – >8       | 83.3                       |
|                                                   | Amikacin                    | 2                        | >32               | 0.5 – >32       | 88.9                       |
|                                                   | Colistin (n=9) <sup>d</sup> | — <sup>b</sup>           | —                 | 0.25 – 2        | 100                        |
|                                                   | Tigecycline                 | 0.5                      | 1                 | 0.25 – 1        | 100                        |
|                                                   | Levofloxacin                | 0.5                      | >4                | ≤0.03 – >4      | 88.9                       |
| Ceftazidime-nonsusceptible, MBL–negative (16)     | Ceftazidime–avibactam       | 0.25                     | 0.5               | 0.12 – 0.5      | 100                        |
|                                                   | Ceftazidime                 | 64                       | >128              | 32 – >128       | 0                          |
|                                                   | Cefepime                    | 8                        | >16               | 0.5 – >16       | 37.5                       |
|                                                   | Aztreonam                   | 64                       | 128               | 16 – >128       | 0                          |
|                                                   | Piperacillin–tazobactam     | 16                       | 64                | 2 – >128        | 50.0                       |
|                                                   | Doripenem                   | 0.06                     | 0.25              | 0.03 – 4        | 93.8                       |
|                                                   | Imipenem                    | 0.5                      | 1                 | 0.25 – 2        | 93.8                       |
|                                                   | Meropenem                   | 0.06                     | 0.12              | 0.03 – 4        | 93.8                       |
|                                                   | Amikacin                    | 4                        | >32               | 0.5 – >32       | 87.5                       |
|                                                   | Colistin (n=7) <sup>d</sup> | — <sup>b</sup>           | —                 | 0.25 – 2        | 100                        |
|                                                   | Tigecycline                 | 0.5                      | 0.5               | 0.25 – 1        | 100                        |
|                                                   | Levofloxacin                | 0.5                      | >4                | ≤0.03 – >4      | 87.5                       |
| Meropenem-nonsusceptible (3)                      | Ceftazidime–avibactam       | — <sup>b</sup>           | —                 | 0.25 – >128     | 33.3                       |
|                                                   | Ceftazidime                 | —                        | —                 | 64 – >128       | 0                          |
|                                                   | Cefepime                    | —                        | —                 | >16 – >16       | 0                          |
|                                                   | Aztreonam                   | —                        | —                 | 0.5 – 64        | 66.7                       |
|                                                   | Piperacillin–tazobactam     | —                        | —                 | 64 – >128       | 0                          |
|                                                   | Doripenem                   | —                        | —                 | 4 – >4          | 0                          |
|                                                   | Imipenem                    | —                        | —                 | 1 – >8          | 33.3                       |
|                                                   | Meropenem                   | —                        | —                 | 4 – >8          | 0                          |
|                                                   | Amikacin                    | —                        | —                 | 2 – >32         | 66.7                       |
|                                                   | Colistin (n=2) <sup>d</sup> | —                        | —                 | 1 – 1           | 100                        |
|                                                   | Tigecycline                 | —                        | —                 | 0.5 – 1         | 100                        |
|                                                   | Levofloxacin                | —                        | —                 | 0.06 – >4       | 66.7                       |
| Meropenem-nonsusceptible, MBL–negative (1)        | Ceftazidime–avibactam       | — <sup>b</sup>           | —                 | 0.25            | 100                        |
|                                                   | Ceftazidime                 | —                        | —                 | 64              | 0                          |
|                                                   | Cefepime                    | —                        | —                 | >16             | 0                          |
|                                                   | Aztreonam                   | —                        | —                 | 64              | 0                          |
|                                                   | Piperacillin–tazobactam     | —                        | —                 | 64              | 0                          |
|                                                   | Doripenem                   | —                        | —                 | 4               | 0                          |
|                                                   | Imipenem                    | —                        | —                 | 1               | 100                        |
|                                                   | Meropenem                   | —                        | —                 | 4               | 0                          |
|                                                   | Amikacin                    | —                        | —                 | >32             | 0                          |
|                                                   | Colistin (n=0) <sup>d</sup> | —                        | —                 | ND <sup>g</sup> | ND                         |
|                                                   | Tigecycline                 | —                        | —                 | 0.5             | 100                        |
|                                                   | Levofloxacin                | —                        | —                 | >4              | 0                          |
| Multidrug–resistant (4)                           | Ceftazidime–avibactam       | — <sup>b</sup>           | —                 | 0.25 – >128     | 50.0                       |
|                                                   | Ceftazidime                 | —                        | —                 | 64 – >128       | 0                          |
|                                                   | Cefepime                    | —                        | —                 | >16 – >16       | 0                          |
|                                                   | Aztreonam                   | —                        | —                 | 0.5 – >128      | 50.0                       |
|                                                   | Piperacillin–tazobactam     | —                        | —                 | 32 – >128       | 0                          |
|                                                   | Doripenem                   | —                        | —                 | 0.06 – >4       | 25.0                       |
|                                                   | Imipenem                    | —                        | —                 | 0.25 – >8       | 50.0                       |
|                                                   | Meropenem                   | —                        | —                 | 0.03 – >8       | 25.0                       |
|                                                   | Amikacin                    | —                        | —                 | 2 – >32         | 75.0                       |
|                                                   | Colistin (n=2) <sup>d</sup> | —                        | —                 | 1 – 1           | 100                        |
|                                                   | Tigecycline                 | —                        | —                 | 0.5 – 1         | 100                        |
|                                                   | Levofloxacin                | —                        | —                 | 0.06 – >4       | 50.0                       |
| Multidrug–resistant, MBL–negative (2)             | Ceftazidime–avibactam       | — <sup>b</sup>           | —                 | 0.25 – 0.5      | 100                        |
|                                                   | Ceftazidime                 | —                        | —                 | 64 – >128       | 0                          |

| Phenotype/Organism (no. of isolates) <sup>a</sup> | Antimicrobial agent          | MIC (µg/ml) <sup>b</sup> |                   |                 | % Susceptible <sup>c</sup> |
|---------------------------------------------------|------------------------------|--------------------------|-------------------|-----------------|----------------------------|
|                                                   |                              | MIC <sub>50</sub>        | MIC <sub>90</sub> | Range           |                            |
|                                                   | Cefepime                     | —                        | —                 | >16 – >16       | 0                          |
|                                                   | Aztreonam                    | —                        | —                 | 64 – >128       | 0                          |
|                                                   | Piperacillin–tazobactam      | —                        | —                 | 32 – 64         | 0                          |
|                                                   | Doripenem                    | —                        | —                 | 0.06 – 4        | 50.0                       |
|                                                   | Imipenem                     | —                        | —                 | 0.25 – 1        | 100                        |
|                                                   | Meropenem                    | —                        | —                 | 0.03 – 4        | 50.0                       |
|                                                   | Amikacin                     | —                        | —                 | 16 – >32        | 50.0                       |
|                                                   | Colistin (n=0) <sup>d</sup>  | —                        | —                 | ND <sup>g</sup> | ND                         |
|                                                   | Tigecycline                  | —                        | —                 | 0.5 – 0.5       | 100                        |
|                                                   | Levofloxacin                 | —                        | —                 | >4 – >4         | 0                          |
| <hr/>                                             |                              |                          |                   |                 |                            |
| Proteaceae                                        |                              |                          |                   |                 |                            |
| All (176) <sup>i</sup>                            | Ceftazidime–avibactam        | 0.03                     | 0.12              | ≤0.015 – 64     | 98.9                       |
|                                                   | Ceftazidime                  | 0.06                     | 4                 | 0.03 – >128     | 93.8                       |
|                                                   | Cefepime                     | ≤0.12                    | 0.5               | ≤0.12 – >16     | 94.9                       |
|                                                   | Aztreonam                    | ≤0.015                   | 0.25              | ≤0.015 – 64     | 98.3                       |
|                                                   | Piperacillin–tazobactam      | 0.5                      | 2                 | ≤0.25 – >128    | 97.7                       |
|                                                   | Doripenem                    | 0.25                     | 0.5               | 0.06 – >4       | 97.2                       |
|                                                   | Imipenem                     | 2                        | 4                 | 0.06 – >8       | 24.4                       |
|                                                   | Meropenem                    | 0.06                     | 0.12              | 0.03 – >8       | 98.9                       |
|                                                   | Amikacin                     | 4                        | 8                 | 0.5 – >32       | 99.4                       |
|                                                   | Colistin (n=90) <sup>d</sup> | >4                       | >4                | >4 – >4         | 0                          |
|                                                   | Tigecycline                  | 2                        | 4                 | 0.12 – >8       | 62.5                       |
|                                                   | Levofloxacin                 | 0.25                     | >4                | ≤0.03 – >4      | 81.8                       |
| All, MBL–negative (174)                           | Ceftazidime–avibactam        | 0.03                     | 0.06              | ≤0.015 – 1      | 100                        |
|                                                   | Ceftazidime                  | 0.06                     | 1                 | 0.03 – >128     | 94.8                       |
|                                                   | Cefepime                     | ≤0.12                    | 0.25              | ≤0.12 – >16     | 96.0                       |
|                                                   | Aztreonam                    | ≤0.015                   | 0.25              | ≤0.015 – 64     | 98.3                       |
|                                                   | Piperacillin–tazobactam      | 0.5                      | 1                 | ≤0.25 – >128    | 98.3                       |
|                                                   | Doripenem                    | 0.25                     | 0.5               | 0.06 – >4       | 98.3                       |
|                                                   | Imipenem                     | 2                        | 4                 | 0.06 – >8       | 24.7                       |
|                                                   | Meropenem                    | 0.06                     | 0.12              | 0.03 – >8       | 99.4                       |
|                                                   | Amikacin                     | 4                        | 8                 | 0.5 – 16        | 100                        |
|                                                   | Colistin (n=90) <sup>d</sup> | >4                       | >4                | >4 – >4         | 0                          |
|                                                   | Tigecycline                  | 2                        | 4                 | 0.12 – >8       | 62.1                       |
|                                                   | Levofloxacin                 | 0.25                     | >4                | ≤0.03 – >4      | 82.8                       |
| Ceftazidime-nonsusceptible (11)                   | Ceftazidime–avibactam        | 0.12                     | 64                | ≤0.015 – 64     | 81.8                       |
|                                                   | Ceftazidime                  | 32                       | 128               | 8 – >128        | 0                          |
|                                                   | Cefepime                     | 2                        | >16               | ≤0.12 – >16     | 54.6                       |
|                                                   | Aztreonam                    | 0.5                      | 32                | ≤0.015 – 64     | 81.8                       |
|                                                   | Piperacillin–tazobactam      | 2                        | 128               | ≤0.25 – >128    | 63.6                       |
|                                                   | Doripenem                    | 0.5                      | >4                | 0.12 – >4       | 63.6                       |
|                                                   | Imipenem                     | 4                        | >8                | 2 – >8          | 0                          |
|                                                   | Meropenem                    | 0.25                     | 8                 | 0.06 – >8       | 81.8                       |
|                                                   | Amikacin                     | 4                        | 16                | 1 – >32         | 90.9                       |
|                                                   | Colistin (n=5) <sup>d</sup>  | — <sup>b</sup>           | —                 | >4 – >4         | 0                          |
|                                                   | Tigecycline                  | 4                        | 4                 | 0.5 – 4         | 36.4                       |
|                                                   | Levofloxacin                 | >4                       | >4                | 1 – >4          | 27.3                       |
| Ceftazidime-nonsusceptible, MBL–negative (9)      | Ceftazidime–avibactam        | — <sup>b</sup>           | —                 | ≤0.015 – 1      | 100                        |
|                                                   | Ceftazidime                  | —                        | —                 | 8 – >128        | 0                          |
|                                                   | Cefepime                     | —                        | —                 | ≤0.12 – >16     | 66.7                       |
|                                                   | Aztreonam                    | —                        | —                 | 0.25 – 64       | 77.8                       |
|                                                   | Piperacillin–tazobactam      | —                        | —                 | ≤0.25 – >128    | 66.7                       |
|                                                   | Doripenem                    | —                        | —                 | 0.12 – >4       | 77.8                       |
|                                                   | Imipenem                     | —                        | —                 | 2 – >8          | 0                          |
|                                                   | Meropenem                    | —                        | —                 | 0.06 – >8       | 88.9                       |
|                                                   | Amikacin                     | —                        | —                 | 1 – 8           | 100                        |
|                                                   | Colistin (n=5) <sup>d</sup>  | —                        | —                 | >4 – >4         | 0                          |
|                                                   | Tigecycline                  | —                        | —                 | 0.5 – 4         | 22.2                       |
|                                                   | Levofloxacin                 | —                        | —                 | 1 – >4          | 33.3                       |

| Phenotype/Organism (no. of isolates) <sup>a</sup>                     | Antimicrobial agent                        | MIC (µg/ml) <sup>b</sup> |                   |             | % Susceptible <sup>c</sup> |
|-----------------------------------------------------------------------|--------------------------------------------|--------------------------|-------------------|-------------|----------------------------|
|                                                                       |                                            | MIC <sub>50</sub>        | MIC <sub>90</sub> | Range       |                            |
| Meropenem-nonsusceptible (2)                                          | Ceftazidime-avibactam                      | — <sup>b</sup>           | —                 | 0.06 – 64   | 50.0                       |
|                                                                       | Ceftazidime                                | —                        | —                 | 8 – 64      | 0                          |
|                                                                       | Cefepime                                   | —                        | —                 | 8 – >16     | 0                          |
|                                                                       | Aztreonam                                  | —                        | —                 | 0.25 – 0.5  | 100                        |
|                                                                       | Piperacillin-tazobactam                    | —                        | —                 | 0.5 – 1     | 100                        |
|                                                                       | Doripenem                                  | —                        | —                 | >4 – >4     | 0                          |
|                                                                       | Imipenem                                   | —                        | —                 | >8 – >8     | 0                          |
|                                                                       | Meropenem                                  | —                        | —                 | 8 – >8      | 0                          |
|                                                                       | Amikacin                                   | —                        | —                 | 1 – >32     | 50.0                       |
|                                                                       | Colistin (n=1) <sup>d</sup>                | —                        | —                 | >4          | 0                          |
|                                                                       | Tigecycline                                | —                        | —                 | 0.5 – 2     | 100                        |
|                                                                       | Levofloxacin                               | —                        | —                 | >4 – >4     | 0                          |
|                                                                       | Meropenem-nonsusceptible, MBL-negative (1) | Ceftazidime-avibactam    | — <sup>b</sup>    | —           | 0.06                       |
| Ceftazidime                                                           |                                            | —                        | —                 | 8           | 0                          |
| Cefepime                                                              |                                            | —                        | —                 | >16         | 0                          |
| Aztreonam                                                             |                                            | —                        | —                 | 0.5         | 100                        |
| Piperacillin-tazobactam                                               |                                            | —                        | —                 | 1           | 100                        |
| Doripenem                                                             |                                            | —                        | —                 | >4          | 0                          |
| Imipenem                                                              |                                            | —                        | —                 | >8          | 0                          |
| Meropenem                                                             |                                            | —                        | —                 | >8          | 0                          |
| Amikacin                                                              |                                            | —                        | —                 | 1           | 100                        |
| Colistin (n=1) <sup>d</sup>                                           |                                            | —                        | —                 | >4          | 0                          |
| Tigecycline                                                           |                                            | —                        | —                 | 0.5         | 100                        |
| Levofloxacin                                                          |                                            | —                        | —                 | >4          | 0                          |
| Multidrug-resistant (3)                                               |                                            | Ceftazidime-avibactam    | — <sup>b</sup>    | —           | 0.06 – 64                  |
|                                                                       | Ceftazidime                                | —                        | —                 | 8 – 64      | 0                          |
|                                                                       | Cefepime                                   | —                        | —                 | 8 – >16     | 0                          |
|                                                                       | Aztreonam                                  | —                        | —                 | 0.25 – 64   | 66.7                       |
|                                                                       | Piperacillin-tazobactam                    | —                        | —                 | 0.5 – 128   | 66.7                       |
|                                                                       | Doripenem                                  | —                        | —                 | 0.5 – >4    | 33.3                       |
|                                                                       | Imipenem                                   | —                        | —                 | 4 – >8      | 0                          |
|                                                                       | Meropenem                                  | —                        | —                 | 0.25 – >8   | 33.3                       |
|                                                                       | Amikacin                                   | —                        | —                 | 1 – >32     | 66.7                       |
|                                                                       | Colistin (n=1) <sup>d</sup>                | —                        | —                 | >4          | 0                          |
|                                                                       | Tigecycline                                | —                        | —                 | 0.5 – 4     | 66.7                       |
|                                                                       | Levofloxacin                               | —                        | —                 | 2 – >4      | 33.3                       |
|                                                                       | Multidrug-resistant, MBL-negative (2)      | Ceftazidime-avibactam    | — <sup>b</sup>    | —           | 0.06 – 0.5                 |
| Ceftazidime                                                           |                                            | —                        | —                 | 8 – 32      | 0                          |
| Cefepime                                                              |                                            | —                        | —                 | >16 – >16   | 0                          |
| Aztreonam                                                             |                                            | —                        | —                 | 0.5 – 64    | 50.0                       |
| Piperacillin-tazobactam                                               |                                            | —                        | —                 | 1 – 128     | 50.0                       |
| Doripenem                                                             |                                            | —                        | —                 | 0.5 – >4    | 50.0                       |
| Imipenem                                                              |                                            | —                        | —                 | 4 – >8      | 0                          |
| Meropenem                                                             |                                            | —                        | —                 | 0.25 – >8   | 50.0                       |
| Amikacin                                                              |                                            | —                        | —                 | 1 – 8       | 100                        |
| Colistin (n=1) <sup>d</sup>                                           |                                            | —                        | —                 | >4          | 0                          |
| Tigecycline                                                           |                                            | —                        | —                 | 0.5 – 4     | 50.0                       |
| Levofloxacin                                                          |                                            | —                        | —                 | 2 – >4      | 50.0                       |
| Other <i>Enterobacteriaceae</i> <sup>f</sup><br>All (29) <sup>k</sup> |                                            | Ceftazidime-avibactam    | 0.12              | 0.25        | 0.06 – 0.5                 |
|                                                                       | Ceftazidime                                | 0.12                     | 16                | 0.06 – 32   | 86.2                       |
|                                                                       | Cefepime                                   | ≤0.12                    | >16               | ≤0.12 – >16 | 86.2                       |
|                                                                       | Aztreonam                                  | 0.12                     | 64                | 0.06 – 64   | 86.2                       |
|                                                                       | Piperacillin-tazobactam                    | 2                        | 32                | 0.5 – >128  | 89.7                       |
|                                                                       | Doripenem                                  | 0.12                     | 0.25              | 0.06 – 0.25 | 100                        |
|                                                                       | Imipenem                                   | 0.5                      | 2                 | 0.25 – 2    | 89.7                       |
|                                                                       | Meropenem                                  | 0.06                     | 0.12              | 0.03 – 0.25 | 100                        |
|                                                                       | Amikacin                                   | 2                        | 16                | 1 – 32      | 96.6                       |
|                                                                       | Colistin (n=16) <sup>d</sup>               | >4                       | >4                | 0.25 – >4   | 12.5                       |
|                                                                       | Tigecycline                                | 1                        | 2                 | 0.25 – 2    | 100                        |



| Phenotype/Organism (no. of isolates) <sup>a</sup> | Antimicrobial agent           | MIC (µg/ml) <sup>b</sup> |                   |             | % Susceptible <sup>c</sup> |      |
|---------------------------------------------------|-------------------------------|--------------------------|-------------------|-------------|----------------------------|------|
|                                                   |                               | MIC <sub>50</sub>        | MIC <sub>90</sub> | Range       |                            |      |
|                                                   | Levofloxacin                  | 0.12                     | 1                 | ≤0.03 – 1   | 100                        |      |
| Ceftazidime-nonsusceptible (4)                    | Ceftazidime–avibactam         | — <sup>b</sup>           | —                 | 0.12 – 0.12 | 100                        |      |
|                                                   | Ceftazidime                   | —                        | —                 | 8 – 32      | 0                          |      |
|                                                   | Cefepime                      | —                        | —                 | 8 – >16     | 0                          |      |
|                                                   | Aztreonam                     | —                        | —                 | 16 – 64     | 0                          |      |
|                                                   | Piperacillin–tazobactam       | —                        | —                 | 4 – >128    | 25.0                       |      |
|                                                   | Doripenem                     | —                        | —                 | 0.12 – 0.25 | 100                        |      |
|                                                   | Imipenem                      | —                        | —                 | 0.5 – 2     | 75.0                       |      |
|                                                   | Meropenem                     | —                        | —                 | 0.06 – 0.25 | 100                        |      |
|                                                   | Amikacin                      | —                        | —                 | 4 – 32      | 75.0                       |      |
|                                                   | Colistin (n=3) <sup>d</sup>   | —                        | —                 | 0.25 – >4   | 33.3                       |      |
|                                                   | Tigecycline                   | —                        | —                 | 0.25 – 1    | 100                        |      |
|                                                   | Levofloxacin                  | —                        | —                 | 0.5 – 1     | 100                        |      |
| Multidrug-resistant (2)                           | Ceftazidime–avibactam         | — <sup>b</sup>           | —                 | 0.12 – 0.12 | 100                        |      |
|                                                   | Ceftazidime                   | —                        | —                 | 16 – 32     | 0                          |      |
|                                                   | Cefepime                      | —                        | —                 | >16 – >16   | 0                          |      |
|                                                   | Aztreonam                     | —                        | —                 | 64 – 64     | 0                          |      |
|                                                   | Piperacillin–tazobactam       | —                        | —                 | 64 – >128   | 0                          |      |
|                                                   | Doripenem                     | —                        | —                 | 0.12 – 0.12 | 100                        |      |
|                                                   | Imipenem                      | —                        | —                 | 0.5 – 1     | 100                        |      |
|                                                   | Meropenem                     | —                        | —                 | 0.06 – 0.06 | 100                        |      |
|                                                   | Amikacin                      | —                        | —                 | 16 – 16     | 100                        |      |
|                                                   | Colistin (n=2) <sup>d</sup>   | —                        | —                 | >4 – >4     | 0                          |      |
|                                                   | Tigecycline                   | —                        | —                 | 0.5 – 1     | 100                        |      |
|                                                   | Levofloxacin                  | —                        | —                 | 0.5 – 1     | 100                        |      |
| <i>Pseudomonas aeruginosa</i>                     |                               |                          |                   |             |                            |      |
| All (304)                                         | Ceftazidime–avibactam         | 2                        | 64                | 0.5 – >128  | 83.9                       |      |
|                                                   | Ceftazidime                   | 4                        | 64                | 0.5 – >128  | 67.8                       |      |
|                                                   | Cefepime                      | 4                        | >16               | 0.5 – >16   | 72.0                       |      |
|                                                   | Aztreonam                     | 8                        | 64                | 0.12 – >128 | 61.2                       |      |
|                                                   | Piperacillin–tazobactam       | 8                        | >128              | 0.5 – >128  | 62.2                       |      |
|                                                   | Doripenem                     | 1                        | >4                | 0.06 – >4   | 70.7                       |      |
|                                                   | Imipenem                      | 2                        | >8                | 0.5 – >8    | 60.2                       |      |
|                                                   | Meropenem                     | 0.5                      | >8                | ≤0.06 – >8  | 69.7                       |      |
|                                                   | Amikacin                      | 4                        | 16                | 0.5 – >32   | 90.5                       |      |
|                                                   | Colistin (n=215) <sup>d</sup> | 2                        | 2                 | 0.25 – >8   | 93.0                       |      |
|                                                   | Levofloxacin                  | 0.5                      | >4                | ≤0.03 – >4  | 68.4                       |      |
|                                                   | All, MBL-negative (264)       | Ceftazidime–avibactam    | 2                 | 8           | 0.5 – 32                   | 96.6 |
|                                                   |                               | Ceftazidime              | 4                 | 64          | 0.5 – >128                 | 78.0 |
|                                                   |                               | Cefepime                 | 2                 | 16          | 0.5 – >16                  | 83.0 |
| Aztreonam                                         |                               | 8                        | 64                | 0.12 – >128 | 63.3                       |      |
| Piperacillin–tazobactam                           |                               | 8                        | >128              | 0.5 – >128  | 70.1                       |      |
| Doripenem                                         |                               | 0.5                      | 4                 | 0.06 – >4   | 81.4                       |      |
| Imipenem                                          |                               | 2                        | >8                | 0.5 – >8    | 69.3                       |      |
| Meropenem                                         |                               | 0.5                      | 8                 | ≤0.06 – >8  | 79.9                       |      |
| Amikacin                                          |                               | 4                        | 8                 | 0.5 – >32   | 98.9                       |      |
| Colistin (n=184) <sup>d</sup>                     |                               | 2                        | 2                 | 0.25 – >8   | 91.9                       |      |
| Levofloxacin                                      |                               | 0.5                      | >4                | ≤0.03 – >4  | 78.8                       |      |
| Ceftazidime-nonsusceptible (98)                   |                               | Ceftazidime–avibactam    | 8                 | >128        | 1 – >128                   | 50.0 |
|                                                   | Ceftazidime                   | 64                       | >128              | 16 – >128   | 0                          |      |
|                                                   | Cefepime                      | >16                      | >16               | 1 – >16     | 17.4                       |      |
|                                                   | Aztreonam                     | 32                       | 64                | 4 – >128    | 23.5                       |      |
|                                                   | Piperacillin–tazobactam       | 128                      | >128              | 8 – >128    | 8.2                        |      |
|                                                   | Doripenem                     | >4                       | >4                | 0.25 – >4   | 36.7                       |      |
|                                                   | Imipenem                      | >8                       | >8                | 1 – >8      | 32.7                       |      |
|                                                   | Meropenem                     | 8                        | >8                | 0.25 – >8   | 37.8                       |      |
|                                                   | Amikacin                      | 8                        | 32                | 0.5 – >32   | 71.4                       |      |
|                                                   | Colistin (n=76) <sup>d</sup>  | 2                        | 2                 | 0.5 – >8    | 90.8                       |      |
|                                                   | Levofloxacin                  | >4                       | >4                | ≤0.03 – >4  | 28.6                       |      |

| Phenotype/Organism (no. of isolates) <sup>a</sup> | Antimicrobial agent          | MIC (µg/ml) <sup>b</sup> |                   |            | % Susceptible <sup>c</sup> |
|---------------------------------------------------|------------------------------|--------------------------|-------------------|------------|----------------------------|
|                                                   |                              | MIC <sub>50</sub>        | MIC <sub>90</sub> | Range      |                            |
| Ceftazidime-nonsusceptible, MBL-negative (58)     | Ceftazidime-avibactam        | 8                        | 16                | 1 – 32     | 84.5                       |
|                                                   | Ceftazidime                  | 64                       | 128               | 16 – >128  | 0                          |
|                                                   | Cefepime                     | 16                       | >16               | 1 – >16    | 29.3                       |
|                                                   | Aztreonam                    | 32                       | 64                | 4 – >128   | 6.9                        |
|                                                   | Piperacillin-tazobactam      | 128                      | >128              | 8 – >128   | 6.9                        |
|                                                   | Doripenem                    | 2                        | >4                | 0.25 – >4  | 62.1                       |
|                                                   | Imipenem                     | 2                        | >8                | 1 – >8     | 55.2                       |
|                                                   | Meropenem                    | 2                        | >8                | 0.25 – >8  | 62.1                       |
|                                                   | Amikacin                     | 4                        | 8                 | 0.5 – >32  | 96.6                       |
|                                                   | Colistin (n=45) <sup>d</sup> | 2                        | 4                 | 0.5 – >8   | 84.4                       |
|                                                   | Levofloxacin                 | 4                        | >4                | ≤0.03 – >4 | 48.3                       |
| Meropenem-nonsusceptible (92)                     | Ceftazidime-avibactam        | 8                        | >128              | 2 – >128   | 54.4                       |
|                                                   | Ceftazidime                  | 32                       | >128              | 2 – >128   | 33.7                       |
|                                                   | Cefepime                     | 16                       | >16               | 1 – >16    | 35.9                       |
|                                                   | Aztreonam                    | 16                       | 64                | 4 – >128   | 39.1                       |
|                                                   | Piperacillin-tazobactam      | 64                       | >128              | 4 – >128   | 23.9                       |
|                                                   | Doripenem                    | >4                       | >4                | 0.5 – >4   | 8.7                        |
|                                                   | Imipenem                     | >8                       | >8                | 2 – >8     | 4.4                        |
|                                                   | Meropenem                    | >8                       | >8                | 4 – >8     | 0                          |
|                                                   | Amikacin                     | 8                        | 32                | 0.5 – >32  | 71.7                       |
|                                                   | Colistin (n=66) <sup>d</sup> | 2                        | 2                 | 0.25 – 8   | 95.5                       |
|                                                   | Levofloxacin                 | >4                       | >4                | 0.25 – >4  | 29.4                       |
| Meropenem-nonsusceptible, MBL-negative (53)       | Ceftazidime-avibactam        | 4                        | 8                 | 2 – 32     | 94.3                       |
|                                                   | Ceftazidime                  | 8                        | 64                | 2 – >128   | 58.5                       |
|                                                   | Cefepime                     | 8                        | 16                | 1 – >16    | 62.3                       |
|                                                   | Aztreonam                    | 16                       | 64                | 4 – >128   | 34.0                       |
|                                                   | Piperacillin-tazobactam      | 32                       | >128              | 4 – >128   | 34.0                       |
|                                                   | Doripenem                    | 4                        | >4                | 0.5 – >4   | 15.1                       |
|                                                   | Imipenem                     | >8                       | >8                | 2 – >8     | 7.6                        |
|                                                   | Meropenem                    | 8                        | >8                | 4 – >8     | 0                          |
|                                                   | Amikacin                     | 4                        | 8                 | 0.5 – >32  | 98.1                       |
|                                                   | Colistin (n=35) <sup>d</sup> | 2                        | 2                 | 0.25 – 8   | 91.4                       |
|                                                   | Levofloxacin                 | 2                        | >4                | 0.25 – >4  | 50.9                       |
| Colistin-resistant (2) <sup>f</sup>               | Ceftazidime-avibactam        | — <sup>b</sup>           | —                 | 4 – 16     | 50.0                       |
|                                                   | Ceftazidime                  | —                        | —                 | 64 – 128   | 0                          |
|                                                   | Cefepime                     | —                        | —                 | 16 – >16   | 0                          |
|                                                   | Aztreonam                    | —                        | —                 | 16 – 64    | 0                          |
|                                                   | Piperacillin-tazobactam      | —                        | —                 | 128 – >128 | 0                          |
|                                                   | Doripenem                    | —                        | —                 | 2 – >4     | 50.0                       |
|                                                   | Imipenem                     | —                        | —                 | 1 – >8     | 50.0                       |
|                                                   | Meropenem                    | —                        | —                 | 2 – 8      | 50.0                       |
|                                                   | Amikacin                     | —                        | —                 | 2 – 4      | 100                        |
|                                                   | Colistin (n=2) <sup>d</sup>  | —                        | —                 | 8 – >8     | 0                          |
|                                                   | Levofloxacin                 | —                        | —                 | 0.5 – 4    | 50.0                       |
| Multidrug-resistant (73)                          | Ceftazidime-avibactam        | 32                       | >128              | 2 – >128   | 37.0                       |
|                                                   | Ceftazidime                  | 64                       | >128              | 8 – >128   | 4.1                        |
|                                                   | Cefepime                     | >16                      | >16               | 8 – >16    | 6.9                        |
|                                                   | Aztreonam                    | 32                       | 64                | 4 – >128   | 26.0                       |
|                                                   | Piperacillin-tazobactam      | 128                      | >128              | 8 – >128   | 5.5                        |
|                                                   | Doripenem                    | >4                       | >4                | 0.5 – >4   | 21.9                       |
|                                                   | Imipenem                     | >8                       | >8                | 1 – >8     | 21.9                       |
|                                                   | Meropenem                    | >8                       | >8                | 0.5 – >8   | 23.3                       |
|                                                   | Amikacin                     | 8                        | 32                | 0.5 – >32  | 67.1                       |
|                                                   | Colistin (n=58) <sup>d</sup> | 2                        | 2                 | 0.25 – >8  | 91.4                       |
|                                                   | Levofloxacin                 | >4                       | >4                | 0.5 – >4   | 12.3                       |
| Multidrug-resistant, MBL-negative (36)            | Ceftazidime-avibactam        | 8                        | 32                | 2 – 32     | 75.0                       |
|                                                   | Ceftazidime                  | 64                       | 128               | 8 – >128   | 8.3                        |
|                                                   | Cefepime                     | >16                      | >16               | 8 – >16    | 13.9                       |

| Phenotype/Organism (no. of isolates) <sup>a</sup> | Antimicrobial agent          | MIC ( $\mu\text{g/ml}$ ) <sup>b</sup> |                   |           | % Susceptible <sup>c</sup> |
|---------------------------------------------------|------------------------------|---------------------------------------|-------------------|-----------|----------------------------|
|                                                   |                              | MIC <sub>50</sub>                     | MIC <sub>90</sub> | Range     |                            |
|                                                   | Aztreonam                    | 64                                    | 128               | 8 – >128  | 2.8                        |
|                                                   | Piperacillin–tazobactam      | >128                                  | >128              | 32 – >128 | 0                          |
|                                                   | Doripenem                    | 4                                     | >4                | 0.5 – >4  | 44.4                       |
|                                                   | Imipenem                     | 4                                     | >8                | 1 – >8    | 44.4                       |
|                                                   | Meropenem                    | 4                                     | >8                | 0.5 – >8  | 47.2                       |
|                                                   | Amikacin                     | 4                                     | 8                 | 0.5 – >32 | 97.2                       |
|                                                   | Colistin (n=29) <sup>d</sup> | 2                                     | 4                 | 0.25 – >8 | 82.8                       |
|                                                   | Levofloxacin                 | >4                                    | >4                | 0.5 – >4  | 25.0                       |

<sup>a</sup> MBL–negative, no gene encoding a metallo– $\beta$ –lactamase was detected by PCR.

<sup>b</sup> —, MIC<sub>50</sub> and MIC<sub>90</sub> were not calculated for n < 10 isolates.

<sup>c</sup> % Susceptibility was determined according to CLSI 2016 breakpoints with the exception of ceftazidime–avibactam and tigecycline, where US FDA breakpoints were applied. Because CLSI colistin breakpoints are not available for the *Enterobacteriaceae*, susceptibility for this organism group was determined using the EUCAST 2016 breakpoints for colistin.

<sup>d</sup> Values are for colistin tested without 0.002% polysorbate–80; isolates collected in 2014–2015 only.

<sup>e</sup> Excludes isolates of Proteae and *Serratia* spp. that are intrinsically resistant to colistin.

<sup>f</sup> All isolates were MBL–negative.

<sup>g</sup> ND, not determined; MIC range and % susceptible were not calculated for n=0 isolates.

<sup>h</sup> *Enterobacter* spp. includes *Enterobacter aerogenes* (n=53), *Enterobacter asburiae* (n=18), *Enterobacter cloacae* (n=87), and *Enterobacter kobei* (n=2).

<sup>i</sup> *Citrobacter* spp. includes *Citrobacter amalonaticus* (n=2), *Citrobacter braakii* (n=4), *Citrobacter freundii* (n=25), *Citrobacter koseri* (n=39), and *Citrobacter sedlakii* (n=1).

<sup>j</sup> Proteae includes *Morganella morganii* (n=35), *Proteus mirabilis* (n=91), *Proteus penneri* (n=5), *Proteus vulgaris* (n=31), *Providencia alcalifaciens* (n=1), *Providencia rettgeri* (n=10), and *Providencia stuartii* (n=3).

<sup>k</sup> Other *Enterobacteriaceae* includes *Raoultella ornithinolytica* (n=1) and *Serratia marcescens* (n=28).

**Supplemental Table S7B.** Philippines – *In vitro* activities of ceftazidime–avibactam and comparator antimicrobial agents tested against 543 isolates of  $\beta$ –lactamase–positive *Enterobacteriaceae* (n=423) and *P. aeruginosa* (n=120) collected as part of the INFORM global surveillance program in 2012–2015.

| Organism/Genotype (no. of isolates) <sup>a</sup>     | Antimicrobial agent                      | MIC ( $\mu$ g/ml) <sup>b</sup> |                   |                        | % Susceptible <sup>c</sup> |
|------------------------------------------------------|------------------------------------------|--------------------------------|-------------------|------------------------|----------------------------|
|                                                      |                                          | MIC <sub>50</sub>              | MIC <sub>90</sub> | Range                  |                            |
| <i>Enterobacteriaceae</i> (423)<br>OSBL–positive (9) | Ceftazidime–avibactam                    | — <sup>b</sup>                 | —                 | 0.06 – 0.5             | 100                        |
|                                                      | Ceftazidime                              | —                              | —                 | 0.12 – 32              | 66.7                       |
|                                                      | Cefepime                                 | —                              | —                 | $\leq$ 0.12 – $>$ 16   | 66.7                       |
|                                                      | Aztreonam                                | —                              | —                 | $\leq$ 0.015 – 64      | 77.8                       |
|                                                      | Piperacillin–tazobactam                  | —                              | —                 | 2 – $>$ 128            | 55.6                       |
|                                                      | Doripenem                                | —                              | —                 | 0.06 – 2               | 88.9                       |
|                                                      | Imipenem                                 | —                              | —                 | 0.12 – 2               | 88.9                       |
|                                                      | Meropenem                                | —                              | —                 | 0.03 – 1               | 100                        |
|                                                      | Amikacin                                 | —                              | —                 | 1 – 8                  | 100                        |
|                                                      | Colistin (n=5) <sup>d</sup>              | —                              | —                 | 0.5 – 1                | 100                        |
|                                                      | Tigecycline                              | —                              | —                 | 0.12 – 1               | 100                        |
|                                                      | Levofloxacin                             | —                              | —                 | 0.06 – $>$ 4           | 44.4                       |
|                                                      | SHV, spectrum undefined (1) <sup>e</sup> | Ceftazidime–avibactam          | — <sup>b</sup>    | —                      | 0.25                       |
| Ceftazidime                                          |                                          | —                              | —                 | 128                    | 0                          |
| Cefepime                                             |                                          | —                              | —                 | $\leq$ 0.12            | 100                        |
| Aztreonam                                            |                                          | —                              | —                 | 64                     | 0                          |
| Piperacillin–tazobactam                              |                                          | —                              | —                 | 64                     | 0                          |
| Doripenem                                            |                                          | —                              | —                 | 0.12                   | 100                        |
| Imipenem                                             |                                          | —                              | —                 | 2                      | 0                          |
| Meropenem                                            |                                          | —                              | —                 | 0.12                   | 100                        |
| Amikacin                                             |                                          | —                              | —                 | 1                      | 100                        |
| Colistin (n=0) <sup>d</sup>                          |                                          | —                              | —                 | ND <sup>f</sup>        | ND                         |
| Tigecycline                                          |                                          | —                              | —                 | 1                      | 100                        |
| Levofloxacin                                         |                                          | —                              | —                 | 1                      | 100                        |
| ESBL–positive (270) <sup>g</sup>                     |                                          | Ceftazidime–avibactam          | 0.25              | 0.5                    | 0.03 – $>$ 128             |
|                                                      | Ceftazidime                              | 32                             | $>$ 128           | 0.03 – $>$ 128         | 10.0                       |
|                                                      | Cefepime                                 | $>$ 16                         | $>$ 16            | $\leq$ 0.12 – $>$ 16   | 11.1                       |
|                                                      | Aztreonam                                | 64                             | $>$ 128           | $\leq$ 0.015 – $>$ 128 | 3.7                        |
|                                                      | Piperacillin–tazobactam                  | 8                              | $>$ 128           | 0.5 – $>$ 128          | 72.6                       |
|                                                      | Doripenem                                | 0.06                           | 0.12              | 0.015 – $>$ 4          | 97.0                       |
|                                                      | Imipenem                                 | 0.25                           | 0.5               | $\leq$ 0.03 – $>$ 8    | 95.9                       |
|                                                      | Meropenem                                | 0.03                           | 0.06              | 0.015 – $>$ 8          | 96.7                       |
|                                                      | Amikacin                                 | 4                              | 8                 | $\leq$ 0.25 – $>$ 32   | 95.9                       |
|                                                      | Colistin (n=159) <sup>d</sup>            | 0.5                            | 1                 | $\leq$ 0.12 – $>$ 4    | 97.5                       |
|                                                      | Tigecycline                              | 0.5                            | 2                 | 0.06 – 8               | 92.6                       |
|                                                      | Levofloxacin                             | $>$ 4                          | $>$ 4             | $\leq$ 0.03 – $>$ 4    | 34.8                       |
|                                                      | AmpC–positive (71) <sup>h</sup>          | Ceftazidime–avibactam          | 0.25              | 0.5                    | 0.03 – 1                   |
| Ceftazidime                                          |                                          | 32                             | $>$ 128           | 0.12 – $>$ 128         | 19.7                       |
| Cefepime                                             |                                          | $\leq$ 0.12                    | 2                 | $\leq$ 0.12 – $>$ 16   | 93.0                       |
| Aztreonam                                            |                                          | 8                              | 64                | 0.06 – 128             | 39.4                       |
| Piperacillin–tazobactam                              |                                          | 16                             | $>$ 128           | $\leq$ 0.25 – $>$ 128  | 59.2                       |
| Doripenem                                            |                                          | 0.12                           | 0.25              | 0.015 – $>$ 4          | 97.2                       |
| Imipenem                                             |                                          | 1                              | 2                 | 0.12 – $>$ 8           | 70.4                       |
| Meropenem                                            |                                          | 0.06                           | 0.12              | 0.015 – $>$ 8          | 98.6                       |
| Amikacin                                             |                                          | 2                              | 8                 | 0.5 – 16               | 100                        |
| Colistin (n=26) <sup>d</sup>                         |                                          | 0.5                            | $>$ 4             | 0.25 – $>$ 4           | 80.8                       |
| Tigecycline                                          |                                          | 0.5                            | 2                 | 0.06 – 8               | 91.5                       |
| Levofloxacin                                         |                                          | 1                              | $>$ 4             | $\leq$ 0.03 – $>$ 4    | 54.9                       |
| ESBL–positive + AmpC–positive (28) <sup>i</sup>      |                                          | Ceftazidime–avibactam          | 0.25              | 1                      | 0.06 – 4                   |
|                                                      | Ceftazidime                              | 64                             | $>$ 128           | 2 – $>$ 128            | 3.6                        |

| Organism/Genotype (no. of isolates) <sup>a</sup>               | Antimicrobial agent          | MIC ( $\mu\text{g/ml}$ ) <sup>b</sup> |                   |                     | % Susceptible <sup>c</sup> |
|----------------------------------------------------------------|------------------------------|---------------------------------------|-------------------|---------------------|----------------------------|
|                                                                |                              | MIC <sub>50</sub>                     | MIC <sub>90</sub> | Range               |                            |
|                                                                | Cefepime                     | >16                                   | >16               | $\leq 0.12 - >16$   | 17.9                       |
|                                                                | Aztreonam                    | 64                                    | >128              | 4 - >128            | 7.1                        |
|                                                                | Piperacillin-tazobactam      | 16                                    | >128              | 2 - >128            | 57.1                       |
|                                                                | Doripenem                    | 0.06                                  | 0.25              | 0.03 - 0.25         | 100                        |
|                                                                | Imipenem                     | 0.5                                   | 1                 | 0.12 - 2            | 92.9                       |
|                                                                | Meropenem                    | 0.06                                  | 0.12              | 0.015 - 0.25        | 100                        |
|                                                                | Amikacin                     | 4                                     | 16                | 0.5 - 16            | 100                        |
|                                                                | Colistin (n=12) <sup>d</sup> | 0.5                                   | 1                 | 0.25 - 1            | 100                        |
|                                                                | Tigecycline                  | 0.5                                   | 1                 | 0.06 - 2            | 100                        |
|                                                                | Levofloxacin                 | >4                                    | >4                | $\leq 0.03 - >4$    | 32.1                       |
| KPC-positive (9) <sup>j</sup>                                  | Ceftazidime-avibactam        | — <sup>b</sup>                        | —                 | 0.25 - 1            | 100                        |
|                                                                | Ceftazidime                  | —                                     | —                 | 16 - >128           | 0                          |
|                                                                | Cefepime                     | —                                     | —                 | 8 - >16             | 0                          |
|                                                                | Aztreonam                    | —                                     | —                 | 64 - >128           | 0                          |
|                                                                | Piperacillin-tazobactam      | —                                     | —                 | >128 - >128         | 0                          |
|                                                                | Doripenem                    | —                                     | —                 | >4 - >4             | 0                          |
|                                                                | Imipenem                     | —                                     | —                 | 8 - >8              | 0                          |
|                                                                | Meropenem                    | —                                     | —                 | >8 - >8             | 0                          |
|                                                                | Amikacin                     | —                                     | —                 | 1 - 32              | 88.9                       |
|                                                                | Colistin (n=8) <sup>d</sup>  | —                                     | —                 | 0.25 - 1            | 100                        |
|                                                                | Tigecycline                  | —                                     | —                 | 0.5 - 1             | 100                        |
|                                                                | Levofloxacin                 | —                                     | —                 | 1 - >4              | 11.1                       |
| MBL-positive (35) <sup>k</sup>                                 | Ceftazidime-avibactam        | >128                                  | >128              | 32 - >128           | 0                          |
|                                                                | Ceftazidime                  | >128                                  | >128              | 64 - >128           | 0                          |
|                                                                | Cefepime                     | >16                                   | >16               | 1 - >16             | 2.9                        |
|                                                                | Aztreonam                    | 64                                    | 128               | $\leq 0.015 - >128$ | 28.6                       |
|                                                                | Piperacillin-tazobactam      | >128                                  | >128              | 0.5 - >128          | 5.7                        |
|                                                                | Doripenem                    | >4                                    | >4                | 2 - >4              | 0                          |
|                                                                | Imipenem                     | >8                                    | >8                | 0.5 - >8            | 5.7                        |
|                                                                | Meropenem                    | >8                                    | >8                | 1 - >8              | 2.9                        |
|                                                                | Amikacin                     | 32                                    | >32               | 1 - >32             | 48.6                       |
|                                                                | Colistin (n=22) <sup>d</sup> | 1                                     | 2                 | 0.25 - >4           | 90.9                       |
|                                                                | Tigecycline                  | 1                                     | 4                 | 0.12 - 8            | 80.0                       |
|                                                                | Levofloxacin                 | >4                                    | >4                | 0.06 - >4           | 34.3                       |
| <i>P. aeruginosa</i> (120)<br>ESBL-positive (1) <sup>l,m</sup> | Ceftazidime-avibactam        | — <sup>b</sup>                        | —                 | 4                   | 100                        |
|                                                                | Ceftazidime                  | —                                     | —                 | >128                | 0                          |
|                                                                | Cefepime                     | —                                     | —                 | >16                 | 0                          |
|                                                                | Aztreonam                    | —                                     | —                 | >128                | 0                          |
|                                                                | Piperacillin-tazobactam      | —                                     | —                 | >128                | 0                          |
|                                                                | Doripenem                    | —                                     | —                 | >4                  | 0                          |
|                                                                | Imipenem                     | —                                     | —                 | >8                  | 0                          |
|                                                                | Meropenem                    | —                                     | —                 | >8                  | 0                          |
|                                                                | Amikacin                     | —                                     | —                 | 8                   | 100                        |
|                                                                | Colistin (n=0) <sup>d</sup>  | —                                     | —                 | ND <sup>f</sup>     | ND                         |
|                                                                | Levofloxacin                 | —                                     | —                 | >4                  | 0                          |
| MBL-positive (40) <sup>l,n</sup>                               | Ceftazidime-avibactam        | 64                                    | >128              | 32 - >128           | 0                          |
|                                                                | Ceftazidime                  | 64                                    | >128              | 32 - >128           | 0                          |
|                                                                | Cefepime                     | >16                                   | >16               | 16 - >16            | 0                          |
|                                                                | Aztreonam                    | 16                                    | 32                | 4 - >128            | 47.5                       |
|                                                                | Piperacillin-tazobactam      | 128                                   | >128              | 8 - >128            | 10.0                       |
|                                                                | Doripenem                    | >4                                    | >4                | 4 - >4              | 0                          |
|                                                                | Imipenem                     | >8                                    | >8                | >8 - >8             | 0                          |
|                                                                | Meropenem                    | >8                                    | >8                | 2 - >8              | 2.5                        |
|                                                                | Amikacin                     | 32                                    | >32               | 4 - >32             | 35.0                       |
|                                                                | Colistin (n=31) <sup>d</sup> | 2                                     | 2                 | 0.5 - 2             | 100                        |
|                                                                | Levofloxacin                 | >4                                    | >4                | 4 - >4              | 0                          |
| No acquired $\beta$ -lactamase detected (79) <sup>l</sup>      | Ceftazidime-avibactam        | 4                                     | 8                 | 1 - 32              | 96.2                       |
|                                                                | Ceftazidime                  | 4                                     | 64                | 1 - 128             | 67.1                       |

| Organism/Genotype (no. of isolates) <sup>a</sup> | Antimicrobial agent          | MIC ( $\mu\text{g/ml}$ ) <sup>b</sup> |                   |                  | % Susceptible <sup>c</sup> |
|--------------------------------------------------|------------------------------|---------------------------------------|-------------------|------------------|----------------------------|
|                                                  |                              | MIC <sub>50</sub>                     | MIC <sub>90</sub> | Range            |                            |
|                                                  | Cefepime                     | 8                                     | 16                | 1 – >16          | 70.9                       |
|                                                  | Aztreonam                    | 16                                    | 64                | 0.25 – 64        | 46.8                       |
|                                                  | Piperacillin–tazobactam      | 16                                    | >128              | 0.5 – >128       | 50.6                       |
|                                                  | Doripenem                    | 4                                     | >4                | 0.12 – >4        | 43.0                       |
|                                                  | Imipenem                     | >8                                    | >8                | 1 – >8           | 6.3                        |
|                                                  | Meropenem                    | 4                                     | >8                | $\leq 0.06$ – >8 | 34.2                       |
|                                                  | Amikacin                     | 4                                     | 8                 | 0.5 – >32        | 97.5                       |
|                                                  | Colistin (n=47) <sup>d</sup> | 2                                     | 2                 | 0.25 – 8         | 91.5                       |
|                                                  | Levofloxacin                 | 2                                     | >4                | 0.25 – >4        | 54.4                       |

<sup>a</sup> OSBL, original–spectrum  $\beta$ –lactamase (e.g. TEM–1, SHV–1, SHV–11); ESBL, extended–spectrum  $\beta$ –lactamase; MBL, metallo– $\beta$ –lactamase.

<sup>b</sup> —, MIC<sub>50</sub> and MIC<sub>90</sub> were not calculated for n <10 isolates.

<sup>c</sup> % Susceptibility was determined according to CLSI 2016 breakpoints with the exception of ceftazidime–avibactam and tigecycline, where US FDA breakpoints were applied. Because CLSI colistin breakpoints are not available for the *Enterobacteriaceae*, susceptibility for this organism group was determined using the EUCAST 2016 breakpoints for colistin.

<sup>d</sup> Values are for colistin tested without 0.002% polysorbate–80; isolates collected in 2014–2015 only.

<sup>e</sup> SHV–110, SHV–type  $\beta$ –lactamase with undefined spectrum of activity.

<sup>f</sup> ND, not determined; MIC range and % susceptible were not calculated for n=0 isolates.

<sup>g</sup> Includes isolates carrying CTX–M–1; CTX–M–3; CTX–M–14; CTX–M–15; CTX–M–24; CTX–M–27; CTX–M–55; CTX–M–65; SHV–5; SHV–12; SHV–28; SHV–90; PER–3; CTX–M–15 and CTX–M–27; CTX–M–55 and CTX–M–65; CTX–M–55 and CTX–M–79; CTX–M–15 and SHV–5; CTX–M–15 and SHV–12; CTX–M–15 and SHV–28; and the chromosomal ESBL common to *K. oxytoca* with or without SHV–type or TEM–type OSBLs or enzymes of undefined spectrum.

<sup>h</sup> Includes isolates carrying CMY–2; CMY–42; DHA–1; CMY–2 and DHA–1; and the chromosomal AmpC common to *Citrobacter* spp., *Enterobacter* spp., *M. organii*, and *Serratia* spp. with or without SHV–OSBLs and/or TEM–OSBLs.

<sup>i</sup> Includes isolates carrying CMY–2 and CTX–M–15; CMY–2 and SHV–12; CMY–42 and CTX–M–15; CMY–59 and CTX–M–15; DHA–1 and one ESBL (CTX–M–3, CTX–M–14, CTX–M–15, SHV–12, SHV–28); DHA–1 and SHV–28 and CTX–M–15; CMY–2 and DHA–1 and CTX–M–15; the chromosomal AmpC common to *Enterobacter* spp. and CTX–M–15; and the chromosomal ESBL common to *K. oxytoca* and DHA–1.

<sup>j</sup> Includes isolates carrying KPC–2 and CTX–M–15; KPC–2 and CTX–M–55; KPC–2 and DHA–1; KPC–2 and CTX–M–55 and DHA–1.

<sup>k</sup> Includes isolates carrying NDM–1; NDM–1 and CTX–M–15; NDM–1 and CTX–M–15 and SHV–12; NDM–7 and CTX–M–15 and SHV–12; IMP–4 and CTX–M–15; IMP–26 and DHA–1; IMP–26 and CTX–M–15; IMP–26 and CTX–M–15 and DHA–1; IMP–26 and CTX–M–15 and SHV–28; the chromosomal AmpC common to *Citrobacter* spp. and NDM–7 or NDM–7 and DHA–1; the chromosomal AmpC common to *Enterobacter* spp. and IMP–4 or NDM–7; the chromosomal AmpC common to *Enterobacter* spp. and NDM–1 and DHA–1; or NDM–1 and SHV–12; or NDM–1 and CTX–M–15 and SHV–31; with or without SHV–OSBLs and/or TEM–OSBLs.

<sup>l</sup> Assumed to carry the chromosomal AmpC common to *P. aeruginosa*.

<sup>m</sup> Isolate carrying SHV-12.

<sup>n</sup> Includes isolates carrying IMP-1; IMP-26; VIM-2; VIM-2 and SHV-12; VIM-2 and IMP-26.

**Supplemental Table S8A.** South Korea – *In vitro* activities of ceftazidime–avibactam and comparator antimicrobial agents tested against 1,184 isolates of *Enterobacteriaceae* and 270 isolates of *P. aeruginosa* collected as part of the INFORM global surveillance program in 2012–2015

| Phenotype/Organism (no. of isolates) <sup>a</sup> | Antimicrobial agent           | MIC (µg/ml) <sup>b</sup> |                   |               | % Susceptible <sup>c</sup> |
|---------------------------------------------------|-------------------------------|--------------------------|-------------------|---------------|----------------------------|
|                                                   |                               | MIC <sub>50</sub>        | MIC <sub>90</sub> | Range         |                            |
| <i>Enterobacteriaceae</i> <sup>d</sup>            |                               |                          |                   |               |                            |
| All (1,184)                                       | Ceftazidime–avibactam         | 0.12                     | 0.5               | ≤0.015 – 8    | 100                        |
|                                                   | Ceftazidime                   | 0.25                     | 128               | ≤0.015 – >128 | 73.7                       |
|                                                   | Cefepime                      | ≤0.12                    | >16               | ≤0.12 – >16   | 76.1                       |
|                                                   | Aztreonam                     | 0.12                     | 128               | ≤0.015 – >128 | 72.1                       |
|                                                   | Piperacillin–tazobactam       | 2                        | 64                | ≤0.25 – >128  | 85.0                       |
|                                                   | Doripenem                     | 0.06                     | 0.25              | ≤0.008 – 4    | 99.8                       |
|                                                   | Imipenem                      | 0.25                     | 2                 | ≤0.03 – 8     | 87.8                       |
|                                                   | Meropenem                     | 0.03                     | 0.12              | 0.008 – >8    | 99.7                       |
|                                                   | Amikacin                      | 2                        | 8                 | ≤0.25 – >32   | 96.0                       |
|                                                   | Colistin (n=692) <sup>e</sup> | 0.5                      | >4                | ≤0.12 – >4    | 87.0                       |
|                                                   | Tigecycline                   | 0.5                      | 2                 | 0.06 – 8      | 94.9                       |
|                                                   | Levofloxacin                  | 0.25                     | >4                | ≤0.03 – >4    | 65.8                       |
| Ceftazidime-nonsusceptible (311)                  | Ceftazidime–avibactam         | 0.5                      | 1                 | ≤0.015 – 8    | 100                        |
|                                                   | Ceftazidime                   | 64                       | >128              | 8 – >128      | 0                          |
|                                                   | Cefepime                      | 16                       | >16               | ≤0.12 – >16   | 31.8                       |
|                                                   | Aztreonam                     | 64                       | >128              | ≤0.015 – >128 | 6.4                        |
|                                                   | Piperacillin–tazobactam       | 32                       | >128              | 0.5 – >128    | 49.2                       |
|                                                   | Doripenem                     | 0.06                     | 0.25              | 0.03 – 4      | 99.0                       |
|                                                   | Imipenem                      | 0.5                      | 2                 | ≤0.03 – 4     | 89.4                       |
|                                                   | Meropenem                     | 0.06                     | 0.12              | 0.03 – >8     | 98.7                       |
|                                                   | Amikacin                      | 4                        | 32                | 0.5 – >32     | 88.8                       |
|                                                   | Colistin (n=184) <sup>e</sup> | 0.5                      | 1                 | 0.25 – >4     | 94.6                       |
|                                                   | Tigecycline                   | 0.5                      | 2                 | 0.06 – 8      | 94.2                       |
|                                                   | Levofloxacin                  | >4                       | >4                | ≤0.03 – >4    | 33.8                       |
| Meropenem-nonsusceptible (4)                      | Ceftazidime–avibactam         | — <sup>b</sup>           | —                 | 0.25 – 2      | 100                        |
|                                                   | Ceftazidime                   | —                        | —                 | 128 – >128    | 0                          |
|                                                   | Cefepime                      | —                        | —                 | 8 – >16       | 0                          |
|                                                   | Aztreonam                     | —                        | —                 | 4 – >128      | 25.0                       |
|                                                   | Piperacillin–tazobactam       | —                        | —                 | 0.5 – >128    | 25.0                       |
|                                                   | Doripenem                     | —                        | —                 | 0.25 – 4      | 50.0                       |
|                                                   | Imipenem                      | —                        | —                 | 0.5 – 4       | 50.0                       |
|                                                   | Meropenem                     | —                        | —                 | 2 – >8        | 0                          |
|                                                   | Amikacin                      | —                        | —                 | 1 – 16        | 100                        |
|                                                   | Colistin (n=2) <sup>e</sup>   | —                        | —                 | 0.25 – 0.5    | 100                        |
|                                                   | Tigecycline                   | —                        | —                 | 0.12 – 8      | 75.0                       |
|                                                   | Levofloxacin                  | —                        | —                 | 2 – >4        | 50.0                       |
| Colistin-resistant (10) <sup>f</sup>              | Ceftazidime–avibactam         | 0.25                     | 0.5               | 0.06 – 1      | 100                        |
|                                                   | Ceftazidime                   | 2                        | >128              | 0.12 – >128   | 60.0                       |
|                                                   | Cefepime                      | ≤0.12                    | >16               | ≤0.12 – >16   | 80.0                       |
|                                                   | Aztreonam                     | 1                        | 128               | 0.06 – >128   | 70.0                       |
|                                                   | Piperacillin–tazobactam       | 4                        | 16                | 1 – >128      | 90.0                       |
|                                                   | Doripenem                     | 0.06                     | 0.12              | 0.03 – 0.25   | 100                        |
|                                                   | Imipenem                      | 0.5                      | 1                 | 0.25 – 2      | 90.0                       |
|                                                   | Meropenem                     | 0.06                     | 0.06              | 0.015 – 0.12  | 100                        |
|                                                   | Amikacin                      | 2                        | 2                 | 1 – 16        | 100                        |
|                                                   | Colistin (n=10) <sup>e</sup>  | >4                       | >4                | 4 – >4        | 0                          |
|                                                   | Tigecycline                   | 0.5                      | 1                 | 0.25 – 1      | 100                        |
|                                                   | Levofloxacin                  | 0.12                     | >4                | ≤0.03 – >4    | 80.0                       |
| Multidrug-resistant (190)                         | Ceftazidime–avibactam         | 0.5                      | 1                 | ≤0.015 – 4    | 100                        |



| Phenotype/Organism (no. of isolates) <sup>a</sup> | Antimicrobial agent           | MIC (µg/ml) <sup>b</sup> |                   |               | % Susceptible <sup>c</sup> |
|---------------------------------------------------|-------------------------------|--------------------------|-------------------|---------------|----------------------------|
|                                                   |                               | MIC <sub>50</sub>        | MIC <sub>90</sub> | Range         |                            |
|                                                   | Ceftazidime                   | 64                       | >128              | 0.06 – >128   | 10.0                       |
|                                                   | Cefepime                      | >16                      | >16               | ≤0.12 – >16   | 6.8                        |
|                                                   | Aztreonam                     | 128                      | >128              | ≤0.015 – >128 | 5.8                        |
|                                                   | Piperacillin–tazobactam       | 32                       | >128              | ≤0.25 – >128  | 49.5                       |
|                                                   | Doripenem                     | 0.12                     | 0.25              | 0.03 – 4      | 98.4                       |
|                                                   | Imipenem                      | 0.25                     | 2                 | 0.06 – 8      | 86.3                       |
|                                                   | Meropenem                     | 0.06                     | 0.12              | 0.03 – >8     | 98.4                       |
|                                                   | Amikacin                      | 4                        | >32               | 0.5 – >32     | 79.0                       |
|                                                   | Colistin (n=114) <sup>e</sup> | 0.5                      | >4                | 0.25 – >4     | 86.8                       |
|                                                   | Tigecycline                   | 1                        | 2                 | 0.06 – 8      | 90.5                       |
|                                                   | Levofloxacin                  | >4                       | >4                | 0.06 – >4     | 8.4                        |
| <i>Escherichia coli</i> <sup>d</sup>              |                               |                          |                   |               |                            |
| All (445)                                         | Ceftazidime–avibactam         | 0.06                     | 0.25              | ≤0.015 – 4    | 100                        |
|                                                   | Ceftazidime                   | 0.25                     | 32                | ≤0.015 – >128 | 78.2                       |
|                                                   | Cefepime                      | ≤0.12                    | >16               | ≤0.12 – >16   | 72.4                       |
|                                                   | Aztreonam                     | 0.12                     | 64                | ≤0.015 – >128 | 73.5                       |
|                                                   | Piperacillin–tazobactam       | 2                        | 16                | ≤0.25 – >128  | 92.6                       |
|                                                   | Doripenem                     | 0.03                     | 0.06              | ≤0.008 – 2    | 99.8                       |
|                                                   | Imipenem                      | 0.25                     | 0.25              | 0.06 – 2      | 99.6                       |
|                                                   | Meropenem                     | 0.03                     | 0.06              | 0.008 – >8    | 99.6                       |
|                                                   | Amikacin                      | 2                        | 8                 | ≤0.25 – >32   | 99.3                       |
|                                                   | Colistin (n=252) <sup>e</sup> | 0.5                      | 1                 | ≤0.12 – 2     | 100                        |
|                                                   | Tigecycline                   | 0.25                     | 0.5               | 0.06 – 2      | 100                        |
|                                                   | Levofloxacin                  | 4                        | >4                | ≤0.03 – >4    | 49.2                       |
| Ceftazidime-nonsusceptible (97)                   | Ceftazidime–avibactam         | 0.25                     | 0.5               | ≤0.015 – 4    | 100                        |
|                                                   | Ceftazidime                   | 32                       | >128              | 8 – >128      | 0                          |
|                                                   | Cefepime                      | >16                      | >16               | ≤0.12 – >16   | 19.6                       |
|                                                   | Aztreonam                     | 32                       | >128              | 1 – >128      | 6.2                        |
|                                                   | Piperacillin–tazobactam       | 4                        | >128              | 0.5 – >128    | 77.3                       |
|                                                   | Doripenem                     | 0.06                     | 0.06              | 0.03 – 2      | 99.0                       |
|                                                   | Imipenem                      | 0.25                     | 0.5               | 0.06 – 2      | 97.9                       |
|                                                   | Meropenem                     | 0.03                     | 0.06              | 0.03 – >8     | 97.9                       |
|                                                   | Amikacin                      | 4                        | 8                 | 0.5 – >32     | 96.9                       |
|                                                   | Colistin (n=56) <sup>e</sup>  | 0.5                      | 1                 | 0.25 – 1      | 100                        |
|                                                   | Tigecycline                   | 0.25                     | 0.5               | 0.06 – 2      | 100                        |
|                                                   | Levofloxacin                  | >4                       | >4                | ≤0.03 – >4    | 15.5                       |
| Meropenem-nonsusceptible (2)                      | Ceftazidime–avibactam         | — <sup>b</sup>           | —                 | 0.5 – 2       | 100                        |
|                                                   | Ceftazidime                   | —                        | —                 | 128 – >128    | 0                          |
|                                                   | Cefepime                      | —                        | —                 | >16 – >16     | 0                          |
|                                                   | Aztreonam                     | —                        | —                 | >128 – >128   | 0                          |
|                                                   | Piperacillin–tazobactam       | —                        | —                 | >128 – >128   | 0                          |
|                                                   | Doripenem                     | —                        | —                 | 0.25 – 2      | 50.0                       |
|                                                   | Imipenem                      | —                        | —                 | 0.5 – 2       | 50.0                       |
|                                                   | Meropenem                     | —                        | —                 | 4 – >8        | 0                          |
|                                                   | Amikacin                      | —                        | —                 | 1 – 4         | 100                        |
|                                                   | Colistin (n=1) <sup>e</sup>   | —                        | —                 | 0.25 – 0.25   | 100                        |
|                                                   | Tigecycline                   | —                        | —                 | 0.12 – 0.25   | 100                        |
|                                                   | Levofloxacin                  | —                        | —                 | >4 – >4       | 0                          |
| Multidrug-resistant (67)                          | Ceftazidime–avibactam         | 0.25                     | 1                 | ≤0.015 – 4    | 100                        |
|                                                   | Ceftazidime                   | 32                       | >128              | 2 – >128      | 7.5                        |
|                                                   | Cefepime                      | >16                      | >16               | 2 – >16       | 1.5                        |
|                                                   | Aztreonam                     | 64                       | >128              | 16 – >128     | 0                          |
|                                                   | Piperacillin–tazobactam       | 8                        | >128              | 0.5 – >128    | 76.1                       |
|                                                   | Doripenem                     | 0.06                     | 0.12              | 0.03 – 2      | 98.5                       |
|                                                   | Imipenem                      | 0.25                     | 0.5               | 0.06 – 2      | 98.5                       |
|                                                   | Meropenem                     | 0.03                     | 0.12              | 0.03 – >8     | 97.0                       |
|                                                   | Amikacin                      | 4                        | 16                | 1 – >32       | 95.5                       |
|                                                   | Colistin (n=36) <sup>e</sup>  | 0.5                      | 1                 | 0.25 – 1      | 100                        |
|                                                   | Tigecycline                   | 0.25                     | 0.5               | 0.06 – 2      | 100                        |
|                                                   | Levofloxacin                  | >4                       | >4                | 1 – >4        | 1.5                        |

| Phenotype/Organism (no. of isolates) <sup>a</sup> | Antimicrobial agent           | MIC (µg/ml) <sup>b</sup> |                   |               | % Susceptible <sup>c</sup> |
|---------------------------------------------------|-------------------------------|--------------------------|-------------------|---------------|----------------------------|
|                                                   |                               | MIC <sub>50</sub>        | MIC <sub>90</sub> | Range         |                            |
| <i>Klebsiella pneumoniae</i> <sup>d</sup>         |                               |                          |                   |               |                            |
| All (326)                                         |                               |                          |                   |               |                            |
|                                                   | Ceftazidime–avibactam         | 0.12                     | 0.5               | ≤0.015 – 4    | 100                        |
|                                                   | Ceftazidime                   | 0.25                     | >128              | 0.03 – >128   | 64.4                       |
|                                                   | Cefepime                      | ≤0.12                    | >16               | ≤0.12 – >16   | 65.3                       |
|                                                   | Aztreonam                     | 0.12                     | >128              | ≤0.015 – >128 | 64.1                       |
|                                                   | Piperacillin–tazobactam       | 4                        | >128              | ≤0.25 – >128  | 74.9                       |
|                                                   | Doripenem                     | 0.06                     | 0.12              | 0.03 – 4      | 99.4                       |
|                                                   | Imipenem                      | 0.25                     | 1                 | 0.06 – 4      | 95.4                       |
|                                                   | Meropenem                     | 0.06                     | 0.12              | 0.015 – >8    | 99.7                       |
|                                                   | Amikacin                      | 1                        | 16                | ≤0.25 – >32   | 93.3                       |
|                                                   | Colistin (n=199) <sup>e</sup> | 0.5                      | 1                 | 0.25 – >4     | 99.0                       |
|                                                   | Tigecycline                   | 0.5                      | 2                 | 0.12 – 4      | 96.9                       |
|                                                   | Levofloxacin                  | 0.12                     | >4                | ≤0.03 – >4    | 68.1                       |
| Ceftazidime-nonsusceptible (116)                  |                               |                          |                   |               |                            |
|                                                   | Ceftazidime–avibactam         | 0.5                      | 1                 | ≤0.015 – 4    | 100                        |
|                                                   | Ceftazidime                   | 128                      | >128              | 8 – >128      | 0                          |
|                                                   | Cefepime                      | >16                      | >16               | ≤0.12 – >16   | 9.5                        |
|                                                   | Aztreonam                     | 128                      | >128              | 1 – >128      | 0.9                        |
|                                                   | Piperacillin–tazobactam       | 64                       | >128              | 2 – >128      | 31.0                       |
|                                                   | Doripenem                     | 0.12                     | 0.25              | 0.03 – 4      | 98.3                       |
|                                                   | Imipenem                      | 0.25                     | 1                 | 0.06 – 4      | 91.4                       |
|                                                   | Meropenem                     | 0.06                     | 0.12              | 0.03 – >8     | 99.1                       |
|                                                   | Amikacin                      | 4                        | >32               | 0.5 – >32     | 81.0                       |
|                                                   | Colistin (n=76) <sup>e</sup>  | 0.5                      | 1                 | 0.25 – >4     | 97.4                       |
|                                                   | Tigecycline                   | 1                        | 2                 | 0.25 – 4      | 94.0                       |
|                                                   | Levofloxacin                  | >4                       | >4                | 0.03 – >4     | 24.1                       |
| Meropenem-nonsusceptible (1)                      |                               |                          |                   |               |                            |
|                                                   | Ceftazidime–avibactam         | — <sup>b</sup>           | —                 | 1             | 100                        |
|                                                   | Ceftazidime                   | —                        | —                 | >128          | 0                          |
|                                                   | Cefepime                      | —                        | —                 | 16            | 0                          |
|                                                   | Aztreonam                     | —                        | —                 | >128          | 0                          |
|                                                   | Piperacillin–tazobactam       | —                        | —                 | >128          | 0                          |
|                                                   | Doripenem                     | —                        | —                 | 4             | 0                          |
|                                                   | Imipenem                      | —                        | —                 | 4             | 0                          |
|                                                   | Meropenem                     | —                        | —                 | >8            | 0                          |
|                                                   | Amikacin                      | —                        | —                 | 2             | 100                        |
|                                                   | Colistin (n=1) <sup>e</sup>   | —                        | —                 | 0.5           | 100                        |
|                                                   | Tigecycline                   | —                        | —                 | 0.5           | 100                        |
|                                                   | Levofloxacin                  | —                        | —                 | 2             | 100                        |
| Multidrug-resistant (92)                          |                               |                          |                   |               |                            |
|                                                   | Ceftazidime–avibactam         | 0.5                      | 1                 | 0.03 – 4      | 100                        |
|                                                   | Ceftazidime                   | 128                      | >128              | 8 – >128      | 0                          |
|                                                   | Cefepime                      | >16                      | >16               | ≤0.12 – >16   | 4.4                        |
|                                                   | Aztreonam                     | 128                      | >128              | 16 – >128     | 0                          |
|                                                   | Piperacillin–tazobactam       | 128                      | >128              | 4 – >128      | 26.1                       |
|                                                   | Doripenem                     | 0.12                     | 0.25              | 0.03 – 4      | 97.8                       |
|                                                   | Imipenem                      | 0.25                     | 2                 | 0.06 – 4      | 89.1                       |
|                                                   | Meropenem                     | 0.06                     | 0.25              | 0.03 – >8     | 98.9                       |
|                                                   | Amikacin                      | 8                        | >32               | 0.5 – >32     | 77.2                       |
|                                                   | Colistin (n=59) <sup>e</sup>  | 0.5                      | 1                 | 0.25 – >4     | 96.6                       |
|                                                   | Tigecycline                   | 1                        | 2                 | 0.5 – 4       | 92.4                       |
|                                                   | Levofloxacin                  | >4                       | >4                | 0.25 – >4     | 13.0                       |
| <i>Klebsiella oxytoca</i> <sup>d</sup>            |                               |                          |                   |               |                            |
| All (66)                                          |                               |                          |                   |               |                            |
|                                                   | Ceftazidime–avibactam         | 0.12                     | 0.25              | ≤0.015 – 4    | 100                        |
|                                                   | Ceftazidime                   | 0.12                     | 4                 | 0.03 – >128   | 90.9                       |
|                                                   | Cefepime                      | ≤0.12                    | 2                 | ≤0.12 – 16    | 90.9                       |
|                                                   | Aztreonam                     | 0.25                     | 32                | ≤0.015 – >128 | 84.9                       |
|                                                   | Piperacillin–tazobactam       | 2                        | >128              | 0.5 – >128    | 87.9                       |
|                                                   | Doripenem                     | 0.06                     | 0.12              | 0.03 – 0.25   | 100                        |
|                                                   | Imipenem                      | 0.25                     | 0.5               | 0.06 – 2      | 98.5                       |
|                                                   | Meropenem                     | 0.03                     | 0.06              | 0.03 – 0.12   | 100                        |
|                                                   | Amikacin                      | 1                        | 4                 | 0.5 – >32     | 98.5                       |

| Phenotype/Organism (no. of isolates) <sup>a</sup> | Antimicrobial agent                   | MIC (µg/ml) <sup>b</sup> |                   |               | % Susceptible <sup>c</sup> |     |
|---------------------------------------------------|---------------------------------------|--------------------------|-------------------|---------------|----------------------------|-----|
|                                                   |                                       | MIC <sub>50</sub>        | MIC <sub>90</sub> | Range         |                            |     |
|                                                   | Colistin (n=43) <sup>e</sup>          | 0.5                      | 1                 | 0.25 – 1      | 100                        |     |
|                                                   | Tigecycline                           | 0.25                     | 0.5               | 0.12 – 4      | 98.5                       |     |
|                                                   | Levofloxacin                          | 0.06                     | 1                 | ≤0.03 – >4    | 93.9                       |     |
| Ceftazidime-nonsusceptible (6)                    | Ceftazidime–avibactam                 | — <sup>b</sup>           | —                 | 0.12 – 4      | 100                        |     |
|                                                   | Ceftazidime                           | —                        | —                 | 16 – >128     | 0                          |     |
|                                                   | Cefepime                              | —                        | —                 | 2 – 16        | 50.0                       |     |
|                                                   | Aztreonam                             | —                        | —                 | 8 – >128      | 0                          |     |
|                                                   | Piperacillin–tazobactam               | —                        | —                 | 4 – >128      | 50.0                       |     |
|                                                   | Doripenem                             | —                        | —                 | 0.03 – 0.25   | 100                        |     |
|                                                   | Imipenem                              | —                        | —                 | 0.25 – 2      | 83.3                       |     |
|                                                   | Meropenem                             | —                        | —                 | 0.03 – 0.12   | 100                        |     |
|                                                   | Amikacin                              | —                        | —                 | 1 – >32       | 83.3                       |     |
|                                                   | Colistin (n=5) <sup>e</sup>           | —                        | —                 | 0.5 – 1       | 100                        |     |
|                                                   | Tigecycline                           | —                        | —                 | 0.25 – 2      | 100                        |     |
|                                                   | Levofloxacin                          | —                        | —                 | 0.06 – >4     | 66.7                       |     |
| Multidrug-resistant (3)                           | Ceftazidime–avibactam                 | — <sup>b</sup>           | —                 | 0.25 – 4      | 100                        |     |
|                                                   | Ceftazidime                           | —                        | —                 | 4 – >128      | 33.3                       |     |
|                                                   | Cefepime                              | —                        | —                 | 16 – 16       | 0                          |     |
|                                                   | Aztreonam                             | —                        | —                 | 32 – >128     | 0                          |     |
|                                                   | Piperacillin–tazobactam               | —                        | —                 | >128 – >128   | 0                          |     |
|                                                   | Doripenem                             | —                        | —                 | 0.06 – 0.12   | 100                        |     |
|                                                   | Imipenem                              | —                        | —                 | 0.25 – 0.5    | 100                        |     |
|                                                   | Meropenem                             | —                        | —                 | 0.12 – 0.12   | 100                        |     |
|                                                   | Amikacin                              | —                        | —                 | 1 – >32       | 66.7                       |     |
|                                                   | Colistin (n=2) <sup>e</sup>           | —                        | —                 | 0.25 – 1      | 100                        |     |
|                                                   | Tigecycline                           | —                        | —                 | 0.25 – 1      | 100                        |     |
|                                                   | Levofloxacin                          | —                        | —                 | 0.06 – 2      | 100                        |     |
|                                                   | <i>Enterobacter</i> spp. <sup>d</sup> |                          |                   |               |                            |     |
| All (135) <sup>e</sup>                            | Ceftazidime–avibactam                 | 0.25                     | 0.5               | 0.03 – 2      | 100                        |     |
|                                                   | Ceftazidime                           | 0.5                      | 128               | 0.06 – >128   | 64.4                       |     |
|                                                   | Cefepime                              | ≤0.12                    | 4                 | ≤0.12 – >16   | 88.9                       |     |
|                                                   | Aztreonam                             | 0.25                     | 64                | ≤0.015 – >128 | 64.4                       |     |
|                                                   | Piperacillin–tazobactam               | 4                        | 128               | 0.5 – >128    | 77.0                       |     |
|                                                   | Doripenem                             | 0.06                     | 0.25              | 0.015 – 1     | 100                        |     |
|                                                   | Imipenem                              | 1                        | 2                 | ≤0.03 – 4     | 84.4                       |     |
|                                                   | Meropenem                             | 0.06                     | 0.12              | 0.015 – 0.5   | 100                        |     |
|                                                   | Amikacin                              | 2                        | 4                 | 0.5 – >32     | 97.8                       |     |
|                                                   | Colistin (n=76) <sup>e</sup>          | 0.5                      | 4                 | ≤0.12 – >4    | 89.5                       |     |
|                                                   | Tigecycline                           | 0.5                      | 1                 | 0.12 – 4      | 96.3                       |     |
|                                                   | Levofloxacin                          | 0.06                     | 4                 | ≤0.03 – >4    | 86.7                       |     |
|                                                   | Ceftazidime-nonsusceptible (48)       | Ceftazidime–avibactam    | 0.5               | 1             | 0.03 – 2                   | 100 |
|                                                   |                                       | Ceftazidime              | 64                | 128           | 8 – >128                   | 0   |
| Cefepime                                          |                                       | 1                        | 16                | ≤0.12 – >16   | 75.0                       |     |
| Aztreonam                                         |                                       | 32                       | 64                | 4 – >128      | 2.1                        |     |
| Piperacillin–tazobactam                           |                                       | 64                       | >128              | 0.5 – >128    | 37.5                       |     |
| Doripenem                                         |                                       | 0.12                     | 0.25              | 0.03 – 0.5    | 100                        |     |
| Imipenem                                          |                                       | 1                        | 2                 | ≤0.03 – 4     | 87.5                       |     |
| Meropenem                                         |                                       | 0.12                     | 0.25              | 0.03 – 0.5    | 100                        |     |
| Amikacin                                          |                                       | 2                        | 8                 | 0.5 – >32     | 93.8                       |     |
| Colistin (n=25) <sup>e</sup>                      |                                       | 0.5                      | 1                 | 0.25 – >4     | 92.0                       |     |
| Tigecycline                                       |                                       | 0.5                      | 2                 | 0.12 – 4      | 95.8                       |     |
| Levofloxacin                                      |                                       | 0.25                     | >4                | ≤0.03 – >4    | 75.0                       |     |
| Colistin-resistant (8)                            | Ceftazidime–avibactam                 | — <sup>b</sup>           | —                 | 0.06 – 0.5    | 100                        |     |
|                                                   | Ceftazidime                           | —                        | —                 | 0.12 – 32     | 75.0                       |     |
|                                                   | Cefepime                              | —                        | —                 | ≤0.12 – 2     | 100                        |     |
|                                                   | Aztreonam                             | —                        | —                 | 0.06 – 16     | 87.5                       |     |
|                                                   | Piperacillin–tazobactam               | —                        | —                 | 1 – 16        | 100                        |     |
|                                                   | Doripenem                             | —                        | —                 | 0.03 – 0.25   | 100                        |     |
|                                                   | Imipenem                              | —                        | —                 | 0.25 – 2      | 87.5                       |     |

| Phenotype/Organism (no. of isolates) <sup>a</sup> | Antimicrobial agent          | MIC (µg/ml) <sup>b</sup> |                   |               | % Susceptible <sup>c</sup> |
|---------------------------------------------------|------------------------------|--------------------------|-------------------|---------------|----------------------------|
|                                                   |                              | MIC <sub>50</sub>        | MIC <sub>90</sub> | Range         |                            |
| Multidrug-resistant (6)                           | Meropenem                    | —                        | —                 | 0.015 – 0.06  | 100                        |
|                                                   | Amikacin                     | —                        | —                 | 1 – 2         | 100                        |
|                                                   | Colistin (n=8) <sup>e</sup>  | —                        | —                 | 4 – >4        | 0                          |
|                                                   | Tigecycline                  | —                        | —                 | 0.25 – 1      | 100                        |
|                                                   | Levofloxacin                 | —                        | —                 | 0.03 – 2      | 100                        |
|                                                   | Ceftazidime–avibactam        | — <sup>b</sup>           | —                 | 0.25 – 1      | 100                        |
|                                                   | Ceftazidime                  | —                        | —                 | 4 – 64        | 16.7                       |
|                                                   | Cefepime                     | —                        | —                 | 1 – >16       | 16.7                       |
|                                                   | Aztreonam                    | —                        | —                 | 16 – 128      | 0                          |
|                                                   | Piperacillin–tazobactam      | —                        | —                 | 4 – 128       | 50.0                       |
|                                                   | Doripenem                    | —                        | —                 | 0.03 – 0.25   | 100                        |
|                                                   | Imipenem                     | —                        | —                 | 0.5 – 1       | 100                        |
|                                                   | Meropenem                    | —                        | —                 | 0.03 – 0.12   | 100                        |
|                                                   | Amikacin                     | —                        | —                 | 1 – >32       | 66.7                       |
| Colistin (n=1) <sup>e</sup>                       | —                            | —                        | 0.25              | 100           |                            |
| Tigecycline                                       | —                            | —                        | 0.5 – 2           | 100           |                            |
| Levofloxacin                                      | —                            | —                        | >4 – >4           | 0             |                            |
| <i>Citrobacter</i> spp. <sup>d</sup>              |                              |                          |                   |               |                            |
| All (72) <sup>h</sup>                             |                              |                          |                   |               |                            |
|                                                   | Ceftazidime–avibactam        | 0.25                     | 1                 | 0.03 – 2      | 100                        |
|                                                   | Ceftazidime                  | 1                        | >128              | 0.06 – >128   | 59.7                       |
|                                                   | Cefepime                     | ≤0.12                    | 4                 | ≤0.12 – >16   | 88.9                       |
|                                                   | Aztreonam                    | 0.5                      | 64                | 0.03 – >128   | 62.5                       |
|                                                   | Piperacillin–tazobactam      | 4                        | >128              | 0.5 – >128    | 70.8                       |
|                                                   | Doripenem                    | 0.06                     | 0.12              | 0.03 – 0.5    | 100                        |
|                                                   | Imipenem                     | 0.5                      | 2                 | 0.06 – 2      | 87.5                       |
|                                                   | Meropenem                    | 0.03                     | 0.12              | 0.015 – 1     | 100                        |
|                                                   | Amikacin                     | 2                        | 4                 | 0.5 – >32     | 97.2                       |
|                                                   | Colistin (n=40) <sup>e</sup> | 0.5                      | 1                 | 0.25 – 1      | 100                        |
|                                                   | Tigecycline                  | 0.25                     | 1                 | 0.12 – 4      | 98.6                       |
|                                                   | Levofloxacin                 | 0.25                     | >4                | ≤0.03 – >4    | 80.6                       |
| Ceftazidime-nonsusceptible (29)                   |                              |                          |                   |               |                            |
|                                                   | Ceftazidime–avibactam        | 0.5                      | 1                 | 0.06 – 2      | 100                        |
|                                                   | Ceftazidime                  | 128                      | >128              | 8 – >128      | 0                          |
|                                                   | Cefepime                     | 1                        | >16               | ≤0.12 – >16   | 72.4                       |
|                                                   | Aztreonam                    | 32                       | 128               | 4 – >128      | 6.9                        |
|                                                   | Piperacillin–tazobactam      | 64                       | >128              | 0.5 – >128    | 27.6                       |
|                                                   | Doripenem                    | 0.06                     | 0.12              | 0.06 – 0.5    | 100                        |
|                                                   | Imipenem                     | 1                        | 1                 | 0.12 – 2      | 96.6                       |
|                                                   | Meropenem                    | 0.06                     | 0.25              | 0.03 – 1      | 100                        |
|                                                   | Amikacin                     | 1                        | 8                 | 0.5 – >32     | 93.1                       |
|                                                   | Colistin (n=16) <sup>e</sup> | 0.5                      | 1                 | 0.25 – 1      | 100                        |
|                                                   | Tigecycline                  | 0.25                     | 2                 | 0.12 – 4      | 96.6                       |
|                                                   | Levofloxacin                 | 0.5                      | >4                | ≤0.03 – >4    | 62.1                       |
| Multidrug-resistant (2)                           |                              |                          |                   |               |                            |
|                                                   | Ceftazidime–avibactam        | — <sup>b</sup>           | —                 | 0.5 – 2       | 100                        |
|                                                   | Ceftazidime                  | —                        | —                 | 32 – >128     | 0                          |
|                                                   | Cefepime                     | —                        | —                 | 1 – >16       | 16.7                       |
|                                                   | Aztreonam                    | —                        | —                 | 32 – >128     | 0                          |
|                                                   | Piperacillin–tazobactam      | —                        | —                 | >128 – >128   | 0                          |
|                                                   | Doripenem                    | —                        | —                 | 0.06 – 0.5    | 100                        |
|                                                   | Imipenem                     | —                        | —                 | 0.5 – 1       | 100                        |
|                                                   | Meropenem                    | —                        | —                 | 0.06 – 1      | 100                        |
|                                                   | Amikacin                     | —                        | —                 | 1 – >32       | 83.3                       |
|                                                   | Colistin (n=3) <sup>e</sup>  | —                        | —                 | 0.25 – 0.5    | 100                        |
|                                                   | Tigecycline                  | —                        | —                 | 0.12 – 2      | 100                        |
|                                                   | Levofloxacin                 | —                        | —                 | >4 – >4       | 0                          |
| <i>Proteaceae</i> <sup>d</sup>                    |                              |                          |                   |               |                            |
| All (117) <sup>i</sup>                            |                              |                          |                   |               |                            |
|                                                   | Ceftazidime–avibactam        | 0.06                     | 0.12              | ≤0.015 – 8    | 100                        |
|                                                   | Ceftazidime                  | 0.06                     | 8                 | ≤0.015 – >128 | 87.2                       |
|                                                   | Cefepime                     | ≤0.12                    | >16               | ≤0.12 – >16   | 84.6                       |
|                                                   | Aztreonam                    | 0.03                     | 4                 | ≤0.015 – 32   | 91.5                       |

| Phenotype/Organism (no. of isolates) <sup>a</sup> | Antimicrobial agent                                                   | MIC (µg/ml) <sup>b</sup> |                   |                 | % Susceptible <sup>c</sup> |
|---------------------------------------------------|-----------------------------------------------------------------------|--------------------------|-------------------|-----------------|----------------------------|
|                                                   |                                                                       | MIC <sub>50</sub>        | MIC <sub>90</sub> | Range           |                            |
|                                                   | Piperacillin–tazobactam                                               | 0.5                      | 4                 | ≤0.25 – 64      | 98.3                       |
|                                                   | Doripenem                                                             | 0.25                     | 0.5               | 0.06 – 1        | 100                        |
|                                                   | Imipenem                                                              | 2                        | 4                 | 0.25 – 8        | 21.4                       |
|                                                   | Meropenem                                                             | 0.12                     | 0.12              | 0.03 – 2        | 99.2                       |
|                                                   | Amikacin                                                              | 4                        | >32               | 0.5 – >32       | 85.5                       |
|                                                   | Colistin (n=69) <sup>e</sup>                                          | >4                       | >4                | >4 – >4         | 0                          |
|                                                   | Tigecycline                                                           | 2                        | 8                 | 0.5 – 8         | 63.3                       |
|                                                   | Levofloxacin                                                          | 1                        | >4                | ≤0.03 – >4      | 67.5                       |
| Ceftazidime-nonsusceptible (15)                   | Ceftazidime–avibactam                                                 | 0.12                     | 0.5               | 0.06 – 8        | 100                        |
|                                                   | Ceftazidime                                                           | 16                       | >128              | 8 – >128        | 0                          |
|                                                   | Cefepime                                                              | 1                        | >16               | ≤0.12 – >16     | 60.0                       |
|                                                   | Aztreonam                                                             | 1                        | 16                | ≤0.015 – 32     | 66.7                       |
|                                                   | Piperacillin–tazobactam                                               | 1                        | 32                | 0.5 – 64        | 86.7                       |
|                                                   | Doripenem                                                             | 0.25                     | 0.5               | 0.06 – 0.5      | 100                        |
|                                                   | Imipenem                                                              | 2                        | 4                 | 0.5 – 4         | 13.3                       |
|                                                   | Meropenem                                                             | 0.12                     | 0.25              | 0.03 – 2        | 93.3                       |
|                                                   | Amikacin                                                              | 4                        | >32               | 1 – >32         | 73.3                       |
|                                                   | Colistin (n=6) <sup>e</sup>                                           | — <sup>b</sup>           | —                 | >4 – >4         | 0                          |
|                                                   | Tigecycline                                                           | 4                        | 8                 | 1 – 8           | 46.7                       |
|                                                   | Levofloxacin                                                          | >4                       | >4                | 0.06 – >4       | 26.7                       |
|                                                   | Meropenem-nonsusceptible (1)                                          | Ceftazidime–avibactam    | — <sup>b</sup>    | —               | 0.25                       |
| Ceftazidime                                       |                                                                       | —                        | —                 | 128             | 0                          |
| Cefepime                                          |                                                                       | —                        | —                 | 8               | 0                          |
| Aztreonam                                         |                                                                       | —                        | —                 | 4               | 100                        |
| Piperacillin–tazobactam                           |                                                                       | —                        | —                 | 0.5             | 100                        |
| Doripenem                                         |                                                                       | —                        | —                 | 0.25            | 100                        |
| Imipenem                                          |                                                                       | —                        | —                 | 1               | 100                        |
| Meropenem                                         |                                                                       | —                        | —                 | 2               | 0                          |
| Amikacin                                          |                                                                       | —                        | —                 | 16              | 100                        |
| Colistin (n=0) <sup>e</sup>                       |                                                                       | —                        | —                 | ND <sup>j</sup> | ND                         |
| Tigecycline                                       |                                                                       | —                        | —                 | 8               | 0                          |
| Levofloxacin                                      |                                                                       | —                        | —                 | 2               | 100                        |
| Multidrug-resistant (16)                          |                                                                       | Ceftazidime–avibactam    | 0.06              | 0.25            | ≤0.015 – 0.5               |
|                                                   | Ceftazidime                                                           | 0.5                      | 64                | 0.06 – >128     | 75.0                       |
|                                                   | Cefepime                                                              | >16                      | >16               | ≤0.12 – >16     | 37.5                       |
|                                                   | Aztreonam                                                             | 0.25                     | 32                | ≤0.015 – 32     | 68.8                       |
|                                                   | Piperacillin–tazobactam                                               | 1                        | 16                | ≤0.25 – 16      | 100                        |
|                                                   | Doripenem                                                             | 0.25                     | 0.5               | 0.12 – 1        | 100                        |
|                                                   | Imipenem                                                              | 2                        | 4                 | 0.5 – 8         | 6.3                        |
|                                                   | Meropenem                                                             | 0.06                     | 0.25              | 0.03 – 0.5      | 100                        |
|                                                   | Amikacin                                                              | >32                      | >32               | 2 – >32         | 25.0                       |
|                                                   | Colistin (n=13) <sup>e</sup>                                          | >4                       | >4                | >4 – >4         | 0                          |
|                                                   | Tigecycline                                                           | 4                        | 8                 | 1 – 8           | 31.3                       |
|                                                   | Levofloxacin                                                          | >4                       | >4                | 4 – >4          | 0                          |
|                                                   | Other <i>Enterobacteriaceae</i> <sup>d</sup><br>All (23) <sup>k</sup> | Ceftazidime–avibactam    | 0.12              | 0.25            | 0.06 – 0.5                 |
| Ceftazidime                                       |                                                                       | 0.12                     | 0.25              | 0.06 – 2        | 100                        |
| Cefepime                                          |                                                                       | ≤0.12                    | 0.25              | ≤0.12 – 1       | 100                        |
| Aztreonam                                         |                                                                       | 0.12                     | 0.25              | 0.06 – 4        | 100                        |
| Piperacillin–tazobactam                           |                                                                       | 2                        | 8                 | 0.5 – 32        | 95.7                       |
| Doripenem                                         |                                                                       | 0.12                     | 0.5               | 0.06 – 0.5      | 100                        |
| Imipenem                                          |                                                                       | 1                        | 2                 | 0.06 – 2        | 82.6                       |
| Meropenem                                         |                                                                       | 0.06                     | 0.12              | 0.06 – 0.12     | 100                        |
| Amikacin                                          |                                                                       | 2                        | 8                 | 0.5 – 8         | 100                        |
| Colistin (n=13) <sup>e</sup>                      |                                                                       | >4                       | >4                | 1 – >4          | 15.4                       |
| Tigecycline                                       |                                                                       | 1                        | 2                 | 0.25 – 2        | 100                        |
| Levofloxacin                                      |                                                                       | 0.25                     | 2                 | ≤0.03 – >4      | 95.7                       |
| <i>Pseudomonas aeruginosa</i><br>All (270)        |                                                                       | Ceftazidime–avibactam    | 2                 | 8               | 0.06 – >128                |

| Phenotype/Organism (no. of isolates) <sup>a</sup> | Antimicrobial agent           | MIC (µg/ml) <sup>b</sup> |                   |              | % Susceptible <sup>c</sup> |
|---------------------------------------------------|-------------------------------|--------------------------|-------------------|--------------|----------------------------|
|                                                   |                               | MIC <sub>50</sub>        | MIC <sub>90</sub> | Range        |                            |
|                                                   | Ceftazidime                   | 2                        | 64                | 0.12 – >128  | 72.6                       |
|                                                   | Cefepime                      | 4                        | 16                | ≤0.12 – >16  | 74.4                       |
|                                                   | Aztreonam                     | 8                        | 32                | 0.06 – >128  | 61.9                       |
|                                                   | Piperacillin–tazobactam       | 8                        | >128              | ≤0.25 – >128 | 65.2                       |
|                                                   | Doripenem                     | 0.5                      | >4                | 0.03 – >4    | 78.2                       |
|                                                   | Imipenem                      | 2                        | >8                | 0.12 – >8    | 67.4                       |
|                                                   | Meropenem                     | 0.5                      | >8                | 0.03 – >8    | 76.7                       |
|                                                   | Amikacin                      | 4                        | 16                | ≤0.25 – >32  | 92.2                       |
|                                                   | Colistin (n=199) <sup>e</sup> | 1                        | 2                 | ≤0.12 – 4    | 98.5                       |
|                                                   | Levofloxacin                  | 1                        | >4                | ≤0.03 – >4   | 64.8                       |
| All, MBL–negative (265)                           | Ceftazidime–avibactam         | 2                        | 8                 | 0.06 – 128   | 96.6                       |
|                                                   | Ceftazidime                   | 2                        | 32                | 0.12 – >128  | 74.0                       |
|                                                   | Cefepime                      | 4                        | 16                | ≤0.12 – >16  | 75.9                       |
|                                                   | Aztreonam                     | 8                        | 32                | 0.06 – >128  | 63.0                       |
|                                                   | Piperacillin–tazobactam       | 8                        | >128              | ≤0.25 – >128 | 66.4                       |
|                                                   | Doripenem                     | 0.5                      | >4                | 0.03 – >4    | 79.6                       |
|                                                   | Imipenem                      | 2                        | >8                | 0.12 – >8    | 68.7                       |
|                                                   | Meropenem                     | 0.5                      | 8                 | 0.03 – >8    | 78.1                       |
|                                                   | Amikacin                      | 4                        | 16                | ≤0.25 – >32  | 94.0                       |
|                                                   | Colistin (n=194) <sup>e</sup> | 1                        | 2                 | ≤0.12 – 4    | 98.5                       |
|                                                   | Levofloxacin                  | 1                        | >4                | ≤0.03 – >4   | 66.0                       |
| Ceftazidime-nonsusceptible (74)                   | Ceftazidime–avibactam         | 8                        | 128               | 1 – >128     | 81.1                       |
|                                                   | Ceftazidime                   | 32                       | >128              | 16 – >128    | 0                          |
|                                                   | Cefepime                      | 16                       | >16               | 8 – >16      | 14.9                       |
|                                                   | Aztreonam                     | 32                       | 64                | 1 – >128     | 10.8                       |
|                                                   | Piperacillin–tazobactam       | 128                      | >128              | 32 – >128    | 0                          |
|                                                   | Doripenem                     | 2                        | >4                | 0.12 – >4    | 52.7                       |
|                                                   | Imipenem                      | 2                        | >8                | 0.5 – >8     | 51.4                       |
|                                                   | Meropenem                     | 2                        | >8                | 0.12 – >8    | 52.7                       |
|                                                   | Amikacin                      | 8                        | >32               | 1 – >32      | 77.0                       |
|                                                   | Colistin (n=55) <sup>e</sup>  | 1                        | 2                 | 0.5 – 2      | 100                        |
|                                                   | Levofloxacin                  | >4                       | >4                | 0.25 – >4    | 33.8                       |
| Ceftazidime-nonsusceptible, MBL–negative (69)     | Ceftazidime–avibactam         | 4                        | 32                | 1 – 128      | 87.0                       |
|                                                   | Ceftazidime                   | 32                       | 128               | 16 – >128    | 0                          |
|                                                   | Cefepime                      | 16                       | >16               | 8 – >16      | 15.9                       |
|                                                   | Aztreonam                     | 32                       | 64                | 1 – >128     | 11.6                       |
|                                                   | Piperacillin–tazobactam       | 128                      | >128              | 32 – >128    | 0                          |
|                                                   | Doripenem                     | 2                        | >4                | 0.12 – >4    | 56.5                       |
|                                                   | Imipenem                      | 2                        | >8                | 0.5 – >8     | 55.1                       |
|                                                   | Meropenem                     | 2                        | >8                | 0.12 – >8    | 56.5                       |
|                                                   | Amikacin                      | 4                        | >32               | 1 – >32      | 82.6                       |
|                                                   | Colistin (n=50) <sup>e</sup>  | 1                        | 2                 | 0.5 – 2      | 100                        |
|                                                   | Levofloxacin                  | >4                       | >4                | 0.25 – >4    | 36.2                       |
| Meropenem-nonsusceptible (63)                     | Ceftazidime–avibactam         | 4                        | 128               | 0.25 – >128  | 79.4                       |
|                                                   | Ceftazidime                   | 32                       | >128              | 0.25 – >128  | 44.4                       |
|                                                   | Cefepime                      | 16                       | >16               | 2 – >16      | 44.4                       |
|                                                   | Aztreonam                     | 32                       | 64                | 0.5 – >128   | 28.6                       |
|                                                   | Piperacillin–tazobactam       | 128                      | >128              | 1 – >128     | 31.8                       |
|                                                   | Doripenem                     | >4                       | >4                | 1 – >4       | 12.7                       |
|                                                   | Imipenem                      | >8                       | >8                | 2 – >8       | 9.5                        |
|                                                   | Meropenem                     | 8                        | >8                | 4 – >8       | 0                          |
|                                                   | Amikacin                      | 8                        | >32               | ≤0.25 – >32  | 69.8                       |
|                                                   | Colistin (n=56) <sup>e</sup>  | 1                        | 2                 | 0.5 – 2      | 100                        |
|                                                   | Levofloxacin                  | >4                       | >4                | 0.25 – >4    | 25.4                       |
| Meropenem-nonsusceptible, MBL–negative (58)       | Ceftazidime–avibactam         | 4                        | 32                | 0.25 – 128   | 86.2                       |
|                                                   | Ceftazidime                   | 16                       | 128               | 0.25 – >128  | 48.3                       |
|                                                   | Cefepime                      | 16                       | >16               | 2 – >16      | 48.3                       |
|                                                   | Aztreonam                     | 32                       | 64                | 0.5 – >128   | 31.0                       |
|                                                   | Piperacillin–tazobactam       | 64                       | >128              | 1 – >128     | 34.5                       |

| Phenotype/Organism (no. of isolates) <sup>a</sup> | Antimicrobial agent          | MIC (µg/ml) <sup>b</sup> |                   |             | % Susceptible <sup>c</sup> |
|---------------------------------------------------|------------------------------|--------------------------|-------------------|-------------|----------------------------|
|                                                   |                              | MIC <sub>50</sub>        | MIC <sub>90</sub> | Range       |                            |
|                                                   | Doripenem                    | >4                       | >4                | 1 – >4      | 13.8                       |
|                                                   | Imipenem                     | >8                       | >8                | 2 – >8      | 10.3                       |
|                                                   | Meropenem                    | 8                        | >8                | 4 – >8      | 0                          |
|                                                   | Amikacin                     | 8                        | >32               | ≤0.25 – >32 | 75.9                       |
|                                                   | Colistin (n=51) <sup>e</sup> | 1                        | 2                 | 0.5 – 2     | 100                        |
|                                                   | Levofloxacin                 | >4                       | >4                | 0.25 – >4   | 27.6                       |
| Multidrug-resistant (44)                          | Ceftazidime–avibactam        | 8                        | 128               | 2 – >128    | 68.2                       |
|                                                   | Ceftazidime                  | 32                       | >128              | 2 – >128    | 6.8                        |
|                                                   | Cefepime                     | 16                       | >16               | 8 – >16     | 4.6                        |
|                                                   | Aztreonam                    | 32                       | 128               | 8 – >128    | 4.6                        |
|                                                   | Piperacillin–tazobactam      | >128                     | >128              | 32 – >128   | 0                          |
|                                                   | Doripenem                    | >4                       | >4                | 0.5 – >4    | 18.2                       |
|                                                   | Imipenem                     | >8                       | >8                | 1 – >8      | 29.6                       |
|                                                   | Meropenem                    | >8                       | >8                | 0.25 – >8   | 20.5                       |
|                                                   | Amikacin                     | 8                        | >32               | 2 – >32     | 61.4                       |
|                                                   | Colistin (n=36) <sup>e</sup> | 1                        | 2                 | 0.5 – 2     | 100                        |
|                                                   | Levofloxacin                 | >4                       | >4                | 0.5 – >4    | 11.4                       |
| Multidrug-resistant, MBL–negative (39)            | Ceftazidime–avibactam        | 8                        | 128               | 2 – 128     | 76.9                       |
|                                                   | Ceftazidime                  | 32                       | >128              | 2 – >128    | 7.7                        |
|                                                   | Cefepime                     | 16                       | >16               | 8 – >16     | 5.1                        |
|                                                   | Aztreonam                    | 32                       | 128               | 8 – >128    | 5.1                        |
|                                                   | Piperacillin–tazobactam      | >128                     | >128              | 32 – >128   | 0                          |
|                                                   | Doripenem                    | >4                       | >4                | 0.5 – >4    | 20.5                       |
|                                                   | Imipenem                     | >8                       | >8                | 1 – >8      | 33.3                       |
|                                                   | Meropenem                    | 8                        | >8                | 0.25 – >8   | 23.1                       |
|                                                   | Amikacin                     | 8                        | >32               | 2 – >32     | 69.2                       |
|                                                   | Colistin (n=31) <sup>e</sup> | 1                        | 2                 | 0.5 – 2     | 100                        |
|                                                   | Levofloxacin                 | >4                       | >4                | 0.5 – >4    | 12.8                       |

<sup>a</sup> MBL–negative, no gene encoding a metallo–β–lactamase was detected by PCR.

<sup>b</sup> —, MIC<sub>50</sub> and MIC<sub>90</sub> were not calculated for n < 10 isolates.

<sup>c</sup> % Susceptibility was determined according to CLSI 2016 breakpoints with the exception of ceftazidime–avibactam and tigecycline, where US FDA breakpoints were applied. Because CLSI colistin breakpoints are not available for the *Enterobacteriaceae*, susceptibility for this organism group was determined using the EUCAST 2016 breakpoints for colistin.

<sup>d</sup> All isolates were MBL–negative.

<sup>e</sup> Values are for colistin tested without 0.002% polysorbate–80; isolates collected in 2014–2015 only.

<sup>f</sup> Excludes isolates of Proteaceae and *Serratia* spp. that are intrinsically resistant to colistin.

<sup>g</sup> *Enterobacter* spp. includes *Enterobacter aerogenes* (n=57), *Enterobacter asburiae* (n=13), *Enterobacter cloacae* (n=60), *Enterobacter kobei* (n=3), and *Enterobacter ludwigii* (n=2).

<sup>h</sup> *Citrobacter* spp. includes *Citrobacter amalonaticus* (n=2), *Citrobacter braakii* (n=8), *Citrobacter farmeri* (n=1), *Citrobacter freundii* (n=55), and *Citrobacter koseri* (n=6).

<sup>i</sup> Proteaceae includes *Morganella morganii* (n=27), *Proteus mirabilis* (n=61), *Proteus vulgaris* (n=22), *Providencia rettgeri* (n=1), and *Providencia stuartii* (n=6).

<sup>j</sup> ND, not determined; MIC range and % susceptible were not calculated for n=0 isolates.

<sup>k</sup> Other *Enterobacteriaceae* includes *Serratia liquefaciens* (n=3) and *Serratia marcescens* (n=20).

**Supplemental Table S8B.** South Korea – *In vitro* activities of ceftazidime–avibactam and comparator antimicrobial agents tested against 411 isolates of  $\beta$ –lactamase–positive *Enterobacteriaceae* (n=321) and *P. aeruginosa* (n=90) collected as part of the INFORM global surveillance program in 2012–2015

| Organism/Genotype (no. of isolates) <sup>a</sup>     | Antimicrobial agent           | MIC ( $\mu\text{g/ml}$ ) <sup>b</sup> |                   |                   | % Susceptible <sup>c</sup> |
|------------------------------------------------------|-------------------------------|---------------------------------------|-------------------|-------------------|----------------------------|
|                                                      |                               | MIC <sub>50</sub>                     | MIC <sub>90</sub> | Range             |                            |
| <i>Enterobacteriaceae</i> (321)<br>OSBL–positive (4) | Ceftazidime–avibactam         | — <sup>b</sup>                        | —                 | 0.12 – 0.5        | 100                        |
|                                                      | Ceftazidime                   | —                                     | —                 | 0.12 – 2          | 100                        |
|                                                      | Cefepime                      | —                                     | —                 | $\leq 0.12$ – 1   | 100                        |
|                                                      | Aztreonam                     | —                                     | —                 | 0.03 – 0.5        | 100                        |
|                                                      | Piperacillin–tazobactam       | —                                     | —                 | 2 – >128          | 50.0                       |
|                                                      | Doripenem                     | —                                     | —                 | 0.06 – 0.5        | 100                        |
|                                                      | Imipenem                      | —                                     | —                 | 0.12 – 2          | 50.0                       |
|                                                      | Meropenem                     | —                                     | —                 | 0.03 – 0.12       | 100                        |
|                                                      | Amikacin                      | —                                     | —                 | 0.5 – 4           | 100                        |
|                                                      | Colistin (n=3) <sup>d</sup>   | —                                     | —                 | 0.5 – 1           | 100                        |
|                                                      | Tigecycline                   | —                                     | —                 | 0.5 – 1           | 100                        |
|                                                      | Levofloxacin                  | —                                     | —                 | 0.12 – >4         | 50.0                       |
| ESBL–positive (230) <sup>e</sup>                     | Ceftazidime–avibactam         | 0.25                                  | 1                 | $\leq 0.015$ – 4  | 100                        |
|                                                      | Ceftazidime                   | 32                                    | >128              | 0.25 – >128       | 27.8                       |
|                                                      | Cefepime                      | >16                                   | >16               | $\leq 0.12$ – >16 | 6.5                        |
|                                                      | Aztreonam                     | 64                                    | >128              | 2 – >128          | 15.7                       |
|                                                      | Piperacillin–tazobactam       | 8                                     | >128              | 0.5 – >128        | 67.8                       |
|                                                      | Doripenem                     | 0.06                                  | 0.12              | 0.015 – 2         | 99.6                       |
|                                                      | Imipenem                      | 0.25                                  | 0.5               | 0.06 – 4          | 96.5                       |
|                                                      | Meropenem                     | 0.06                                  | 0.12              | 0.015 – 4         | 99.1                       |
|                                                      | Amikacin                      | 4                                     | 16                | 0.5 – >32         | 93.0                       |
|                                                      | Colistin (n=156) <sup>d</sup> | 0.5                                   | 1                 | 0.25 – >4         | 96.2                       |
|                                                      | Tigecycline                   | 0.5                                   | 2                 | 0.06 – 8          | 95.2                       |
|                                                      | Levofloxacin                  | >4                                    | >4                | $\leq 0.03$ – >4  | 21.3                       |
| AmpC–positive (53) <sup>f</sup>                      | Ceftazidime–avibactam         | 0.25                                  | 1                 | 0.03 – 2          | 100                        |
|                                                      | Ceftazidime                   | 32                                    | 128               | 0.06 – >128       | 35.8                       |
|                                                      | Cefepime                      | 0.25                                  | 4                 | $\leq 0.12$ – 8   | 88.7                       |
|                                                      | Aztreonam                     | 8                                     | 64                | 0.03 – 128        | 49.1                       |
|                                                      | Piperacillin–tazobactam       | 4                                     | >128              | 0.5 – >128        | 64.2                       |
|                                                      | Doripenem                     | 0.12                                  | 0.25              | 0.03 – 4          | 98.1                       |
|                                                      | Imipenem                      | 1                                     | 2                 | 0.25 – 8          | 54.7                       |
|                                                      | Meropenem                     | 0.06                                  | 0.12              | 0.03 – 0.5        | 100                        |
|                                                      | Amikacin                      | 2                                     | 8                 | 0.5 – >32         | 94.3                       |
|                                                      | Colistin (n=26) <sup>d</sup>  | 1                                     | >4                | 0.25 – >4         | 88.5                       |
|                                                      | Tigecycline                   | 0.5                                   | 2                 | 0.12 – 8          | 90.6                       |
|                                                      | Levofloxacin                  | 0.5                                   | >4                | $\leq 0.03$ – >4  | 67.9                       |
| ESBL–positive + AmpC–positive (33) <sup>g</sup>      | Ceftazidime–avibactam         | 0.5                                   | 1                 | 0.03 – 4          | 100                        |
|                                                      | Ceftazidime                   | 128                                   | >128              | 4 – >128          | 3.0                        |
|                                                      | Cefepime                      | 16                                    | >16               | $\leq 0.12$ – >16 | 15.2                       |
|                                                      | Aztreonam                     | 128                                   | >128              | 8 – >128          | 0.0                        |
|                                                      | Piperacillin–tazobactam       | 64                                    | >128              | 0.5 – >128        | 39.4                       |
|                                                      | Doripenem                     | 0.12                                  | 0.25              | 0.03 – 1          | 100                        |
|                                                      | Imipenem                      | 1                                     | 2                 | 0.12 – 4          | 69.7                       |
|                                                      | Meropenem                     | 0.12                                  | 0.25              | 0.03 – >8         | 97.0                       |
|                                                      | Amikacin                      | 16                                    | >32               | 0.5 – >32         | 60.6                       |
|                                                      | Colistin (n=16) <sup>d</sup>  | 0.5                                   | 1                 | 0.25 – 1          | 100                        |
|                                                      | Tigecycline                   | 1                                     | 2                 | 0.25 – 2          | 100                        |
|                                                      | Levofloxacin                  | >4                                    | >4                | 0.5 – >4          | 27.3                       |
| GES carbapenemase–positive (1) <sup>h</sup>          | Ceftazidime–avibactam         | — <sup>b</sup>                        | —                 | 1                 | 100                        |
|                                                      | Ceftazidime                   | —                                     | —                 | >128              | 0                          |



| Organism/Genotype (no. of isolates) <sup>a</sup>   | Antimicrobial agent          | MIC (µg/ml) <sup>b</sup> |                   |              | % Susceptible <sup>c</sup> |
|----------------------------------------------------|------------------------------|--------------------------|-------------------|--------------|----------------------------|
|                                                    |                              | MIC <sub>50</sub>        | MIC <sub>90</sub> | Range        |                            |
|                                                    | Cefepime                     | —                        | —                 | 16           | 0                          |
|                                                    | Aztreonam                    | —                        | —                 | >128         | 0                          |
|                                                    | Piperacillin–tazobactam      | —                        | —                 | >128         | 0                          |
|                                                    | Doripenem                    | —                        | —                 | 4            | 0                          |
|                                                    | Imipenem                     | —                        | —                 | 4            | 0                          |
|                                                    | Meropenem                    | —                        | —                 | >8           | 0                          |
|                                                    | Amikacin                     | —                        | —                 | 2            | 100                        |
|                                                    | Colistin (n=1) <sup>d</sup>  | —                        | —                 | 0.5          | 100                        |
|                                                    | Tigecycline                  | —                        | —                 | 0.05         | 100                        |
|                                                    | Levofloxacin                 | —                        | —                 | 2            | 100                        |
| <i>P. aeruginosa</i> (90)                          | Ceftazidime–avibactam        | — <sup>b</sup>           | —                 | 8            | 100                        |
| GES, Spectrum undefined (1) <sup>ij</sup>          | Ceftazidime                  | —                        | —                 | 64           | 0                          |
|                                                    | Cefepime                     | —                        | —                 | 16           | 0                          |
|                                                    | Aztreonam                    | —                        | —                 | 16           | 0                          |
|                                                    | Piperacillin–tazobactam      | —                        | —                 | >128         | 0                          |
|                                                    | Doripenem                    | —                        | —                 | >4           | 0                          |
|                                                    | Imipenem                     | —                        | —                 | 4            | 0                          |
|                                                    | Meropenem                    | —                        | —                 | >8           | 0                          |
|                                                    | Amikacin                     | —                        | —                 | >32          | 0                          |
|                                                    | Colistin (n=1) <sup>d</sup>  | —                        | —                 | 1            | 100                        |
|                                                    | Levofloxacin                 | —                        | —                 | >4           | 0                          |
| MBL–positive (5) <sup>ik</sup>                     | Ceftazidime–avibactam        | — <sup>b</sup>           | —                 | 128 – >128   | 0                          |
|                                                    | Ceftazidime                  | —                        | —                 | 128 – >128   | 0                          |
|                                                    | Cefepime                     | —                        | —                 | >16 – >16    | 0                          |
|                                                    | Aztreonam                    | —                        | —                 | 16 – 128     | 0                          |
|                                                    | Piperacillin–tazobactam      | —                        | —                 | >128 – >128  | 0                          |
|                                                    | Doripenem                    | —                        | —                 | >4 – >4      | 0                          |
|                                                    | Imipenem                     | —                        | —                 | >8 – >8      | 0                          |
|                                                    | Meropenem                    | —                        | —                 | >8 – >8      | 0                          |
|                                                    | Amikacin                     | —                        | —                 | >32 – >32    | 0                          |
|                                                    | Colistin (n=5) <sup>d</sup>  | —                        | —                 | 0.5 – 2      | 100                        |
|                                                    | Levofloxacin                 | —                        | —                 | >4 – >4      | 0                          |
| No acquired β–lactamase detected (84) <sup>i</sup> | Ceftazidime–avibactam        | 4                        | 8                 | 0.25 – 128   | 90.5                       |
|                                                    | Ceftazidime                  | 8                        | 64                | 0.25 – >128  | 57.1                       |
|                                                    | Cefepime                     | 8                        | >16               | 0.5 – >16    | 58.3                       |
|                                                    | Aztreonam                    | 16                       | 64                | 0.5 – >128   | 44.0                       |
|                                                    | Piperacillin–tazobactam      | 32                       | >128              | ≤0.25 – >128 | 45.2                       |
|                                                    | Doripenem                    | 4                        | >4                | 0.12 – >4    | 36.9                       |
|                                                    | Imipenem                     | >8                       | >8                | 2 – >8       | 11.9                       |
|                                                    | Meropenem                    | 4                        | >8                | 0.25 – >8    | 32.1                       |
|                                                    | Amikacin                     | 4                        | >32               | ≤0.25 – >32  | 84.5                       |
|                                                    | Colistin (n=65) <sup>d</sup> | 2                        | 2                 | 0.5 – 4      | 98.5                       |
|                                                    | Levofloxacin                 | 4                        | >4                | 0.12 – >4    | 36.9                       |

<sup>a</sup> OSBL, original–spectrum β–lactamase (e.g. TEM–1, SHV–1, SHV–11); ESBL, extended–spectrum β–lactamase; MBL, metallo–β–lactamase.

<sup>b</sup> —, MIC<sub>50</sub> and MIC<sub>90</sub> were not calculated for n <10 isolates.

<sup>c</sup> % Susceptibility was determined according to CLSI 2016 breakpoints with the exception of ceftazidime–avibactam and tigecycline, where US FDA breakpoints were applied. Because CLSI colistin breakpoints are not available for the *Enterobacteriaceae*, susceptibility for this organism group was determined using the EUCAST 2016 breakpoints for colistin.

<sup>d</sup> Values are for colistin tested without 0.002% polysorbate–80; isolates collected in 2014–2015 only.

<sup>e</sup> Includes isolates carrying CTX–M–2; CTX–M–3; CTX–M–14; CTX–M–15; CTX–M–24; CTX–M–27; CTX–M–55; CTX–M–90; CTX–M–101; CTX–M–104; CTX–M–179; SHV–2A; SHV–12; TEM–25; PER–1; VEB–1A;

CTX-M-15 and CTX-M-14; CTX-M-15 and SHV-5; CTX-M-15 and SHV-12; CTX-M-15 and SHV-28; CTX-M-55 and SHV-12; CTX-M-15 and CTX-M-14 and SHV-12; and the chromosomal ESBL common to *K. oxytoca* with or without SHV-type or TEM-type OSBLs or enzymes of undefined spectrum.

<sup>f</sup> Includes isolates carrying CMY-2; CMY-10; CMY-11; DHA-1; and the chromosomal AmpC common to *Citrobacter* spp., *Enterobacter* spp., and *Serratia* spp. with or without SHV-OSBLs and/or TEM-OSBLs.

<sup>g</sup> Includes isolates carrying CMY-2 and a CTX-M-type ESBL (CTX-M-14, CTX-M-15, or CTX-M-55); DHA-1 and one ESBL (CTX-M-14, CTX-M-15, SHV-5, SHV-12, or the chromosomal ESBL of *K. oxytoca*); DHA-1 and multiple ESBLs (SHV-12 and CTX-M-15; CTX-M-14 and CTX-M-15); DHA-1 and CTX-M-14 and SHV-12; a MOX-type AmpC and CTX-M-3;

and the chromosomal AmpC common to *Enterobacter* spp. and  $\beta$ -lactamases (CTX-M-3, CTX-M-9, SHV-12, SHV-12 and DHA-1) with or without SHV-OSBLs and/or TEM-OSBLs.

<sup>h</sup> Isolate carrying GES-5 and SHV-12.

<sup>i</sup> Assumed to carry the chromosomal AmpC common to *P. aeruginosa*.

<sup>j</sup> Isolate carrying GES-24.

<sup>k</sup> Isolates carrying IMP-6.

**Supplemental Table S9A.** Taiwan – *In vitro* activities of ceftazidime–avibactam and comparator antimicrobial agents tested against 1,247 isolates of *Enterobacteriaceae* and 288 isolates of *P. aeruginosa* collected as part of the INFORM global surveillance program in 2012–2015

| Phenotype/Organism (no. of isolates) <sup>a</sup> | Antimicrobial agent           | MIC (µg/ml) <sup>b</sup> |                   |               | % Susceptible <sup>c</sup> |
|---------------------------------------------------|-------------------------------|--------------------------|-------------------|---------------|----------------------------|
|                                                   |                               | MIC <sub>50</sub>        | MIC <sub>90</sub> | Range         |                            |
| <i>Enterobacteriaceae</i>                         |                               |                          |                   |               |                            |
| All (1,247)                                       | Ceftazidime–avibactam         | 0.12                     | 0.5               | ≤0.015 – >128 | 99.1                       |
|                                                   | Ceftazidime                   | 0.25                     | 128               | ≤0.015 – >128 | 74.0                       |
|                                                   | Cefepime                      | ≤0.12                    | 16                | ≤0.12 – >16   | 83.9                       |
|                                                   | Aztreonam                     | 0.12                     | 64                | ≤0.015 – >128 | 75.8                       |
|                                                   | Piperacillin–tazobactam       | 2                        | 128               | ≤0.25 – >128  | 84.5                       |
|                                                   | Doripenem                     | 0.06                     | 0.25              | 0.015 – >4    | 99.0                       |
|                                                   | Imipenem                      | 0.25                     | 2                 | ≤0.03 – >8    | 85.7                       |
|                                                   | Meropenem                     | 0.03                     | 0.12              | ≤0.004 – >8   | 99.0                       |
|                                                   | Amikacin                      | 2                        | 4                 | ≤0.25 – >32   | 97.7                       |
|                                                   | Colistin (n=670) <sup>d</sup> | 0.5                      | >4                | ≤0.12 – >4    | 83.9                       |
|                                                   | Tigecycline                   | 0.5                      | 2                 | ≤0.015 – >8   | 94.0                       |
|                                                   | Levofloxacin                  | 0.12                     | >4                | ≤0.03 – >4    | 77.4                       |
| All, MBL–negative (1,240)                         | Ceftazidime–avibactam         | 0.12                     | 0.5               | ≤0.015 – >128 | 99.7                       |
|                                                   | Ceftazidime                   | 0.25                     | 128               | ≤0.015 – >128 | 74.4                       |
|                                                   | Cefepime                      | ≤0.12                    | 16                | ≤0.12 – >16   | 84.4                       |
|                                                   | Aztreonam                     | 0.12                     | 64                | ≤0.015 – >128 | 76.1                       |
|                                                   | Piperacillin–tazobactam       | 2                        | 128               | ≤0.25 – >128  | 84.6                       |
|                                                   | Doripenem                     | 0.06                     | 0.25              | 0.015 – >4    | 99.4                       |
|                                                   | Imipenem                      | 0.25                     | 2                 | ≤0.03 – >8    | 86.1                       |
|                                                   | Meropenem                     | 0.03                     | 0.12              | ≤0.004 – >8   | 99.3                       |
|                                                   | Amikacin                      | 2                        | 4                 | ≤0.25 – >32   | 97.7                       |
|                                                   | Colistin (n=670) <sup>d</sup> | 0.5                      | >4                | ≤0.12 – >4    | 83.9                       |
|                                                   | Tigecycline                   | 0.5                      | 2                 | ≤0.015 – >8   | 94.0                       |
|                                                   | Levofloxacin                  | 0.12                     | >4                | ≤0.03 – >4    | 77.6                       |
| Ceftazidime-nonsusceptible (324)                  | Ceftazidime–avibactam         | 0.25                     | 2                 | ≤0.015 – >128 | 96.6                       |
|                                                   | Ceftazidime                   | 64                       | >128              | 8 – >128      | 0                          |
|                                                   | Cefepime                      | 4                        | >16               | ≤0.12 – >16   | 46.3                       |
|                                                   | Aztreonam                     | 64                       | >128              | 0.06 – >128   | 12.4                       |
|                                                   | Piperacillin–tazobactam       | 32                       | >128              | 1 – >128      | 49.1                       |
|                                                   | Doripenem                     | 0.06                     | 0.5               | 0.015 – >4    | 96.6                       |
|                                                   | Imipenem                      | 0.5                      | 2                 | 0.06 – >8     | 87.4                       |
|                                                   | Meropenem                     | 0.06                     | 0.25              | ≤0.004 – >8   | 96.3                       |
|                                                   | Amikacin                      | 2                        | 16                | 0.5 – >32     | 91.7                       |
|                                                   | Colistin (n=175) <sup>d</sup> | 0.5                      | 2                 | 0.25 – >4     | 91.4                       |
|                                                   | Tigecycline                   | 0.5                      | 2                 | 0.06 – 8      | 96.6                       |
|                                                   | Levofloxacin                  | 4                        | >4                | ≤0.03 – >4    | 47.8                       |
| Ceftazidime-nonsusceptible, MBL–negative (317)    | Ceftazidime–avibactam         | 0.25                     | 1                 | ≤0.015 – >128 | 98.7                       |
|                                                   | Ceftazidime                   | 64                       | >128              | 8 – >128      | 0                          |
|                                                   | Cefepime                      | 4                        | >16               | ≤0.12 – >16   | 47.3                       |
|                                                   | Aztreonam                     | 64                       | >128              | 0.12 – >128   | 12.0                       |
|                                                   | Piperacillin–tazobactam       | 32                       | >128              | 1 – >128      | 48.6                       |
|                                                   | Doripenem                     | 0.06                     | 0.25              | 0.015 – >4    | 98.1                       |
|                                                   | Imipenem                      | 0.5                      | 2                 | 0.06 – >8     | 88.6                       |
|                                                   | Meropenem                     | 0.06                     | 0.25              | ≤0.004 – >8   | 97.2                       |
|                                                   | Amikacin                      | 2                        | 16                | 0.5 – >32     | 91.5                       |
|                                                   | Colistin (n=175) <sup>d</sup> | 0.5                      | 2                 | 0.25 – >4     | 91.4                       |
|                                                   | Tigecycline                   | 0.5                      | 2                 | 0.06 – 8      | 96.5                       |
|                                                   | Levofloxacin                  | 4                        | >4                | ≤0.03 – >4    | 48.0                       |
| Meropenem-nonsusceptible (12)                     | Ceftazidime–avibactam         | 2                        | >128              | 0.5 – >128    | 66.7                       |

| Phenotype/Organism (no. of isolates) <sup>a</sup> | Antimicrobial agent          | MIC ( $\mu\text{g/ml}$ ) <sup>b</sup> |                   |                   | % Susceptible <sup>c</sup> |
|---------------------------------------------------|------------------------------|---------------------------------------|-------------------|-------------------|----------------------------|
|                                                   |                              | MIC <sub>50</sub>                     | MIC <sub>90</sub> | Range             |                            |
|                                                   | Ceftazidime                  | >128                                  | >128              | 32 – >128         | 0                          |
|                                                   | Cefepime                     | >16                                   | >16               | 8 – >16           | 0                          |
|                                                   | Aztreonam                    | >128                                  | >128              | 0.25 – >128       | 8.3                        |
|                                                   | Piperacillin–tazobactam      | >128                                  | >128              | 4 – >128          | 25.0                       |
|                                                   | Doripenem                    | 4                                     | >4                | 1 – >4            | 25.0                       |
|                                                   | Imipenem                     | 8                                     | >8                | 0.25 – >8         | 25.0                       |
|                                                   | Meropenem                    | 2                                     | 8                 | 2 – >8            | 0                          |
|                                                   | Amikacin                     | 2                                     | 32                | 1 – >32           | 83.3                       |
|                                                   | Colistin (n=6) <sup>d</sup>  | — <sup>b</sup>                        | —                 | 0.25 – 2          | 100                        |
|                                                   | Tigecycline                  | 0.5                                   | 4                 | 0.12 – 4          | 83.3                       |
|                                                   | Levofloxacin                 | >4                                    | >4                | 0.5 – >4          | 16.7                       |
| Meropenem-nonsusceptible, MBL–negative (9)        | Ceftazidime–avibactam        | — <sup>b</sup>                        | —                 | 0.5 – 16          | 88.9                       |
|                                                   | Ceftazidime                  | —                                     | —                 | 32 – >128         | 0                          |
|                                                   | Cefepime                     | —                                     | —                 | 8 – >16           | 0                          |
|                                                   | Aztreonam                    | —                                     | —                 | 32 – >128         | 0                          |
|                                                   | Piperacillin–tazobactam      | —                                     | —                 | 32 – >128         | 0                          |
|                                                   | Doripenem                    | —                                     | —                 | 1 – >4            | 33.3                       |
|                                                   | Imipenem                     | —                                     | —                 | 0.25 – >8         | 33.3                       |
|                                                   | Meropenem                    | —                                     | —                 | 2 – >8            | 0                          |
|                                                   | Amikacin                     | —                                     | —                 | 1 – >32           | 77.8                       |
|                                                   | Colistin (n=6) <sup>d</sup>  | —                                     | —                 | 0.25 – 2          | 100                        |
|                                                   | Tigecycline                  | —                                     | —                 | 0.12 – 4          | 77.8                       |
|                                                   | Levofloxacin                 | —                                     | —                 | 2 – >4            | 11.1                       |
| Colistin–resistant (11) <sup>e</sup>              | Ceftazidime–avibactam        | 0.25                                  | 0.5               | $\leq 0.015$ – 1  | 100                        |
|                                                   | Ceftazidime                  | 32                                    | 128               | 0.06 – 128        | 45.5                       |
|                                                   | Cefepime                     | 0.25                                  | 0.5               | $\leq 0.12$ – 8   | 90.9                       |
|                                                   | Aztreonam                    | 8                                     | 64                | $\leq 0.015$ – 64 | 45.5                       |
|                                                   | Piperacillin–tazobactam      | 8                                     | 128               | 0.5 – >128        | 63.6                       |
|                                                   | Doripenem                    | 0.12                                  | 0.25              | 0.03 – 0.5        | 100                        |
|                                                   | Imipenem                     | 1                                     | 1                 | 0.5 – 4           | 90.9                       |
|                                                   | Meropenem                    | 0.12                                  | 0.12              | 0.03 – 0.12       | 100                        |
|                                                   | Amikacin                     | 2                                     | 2                 | 1 – >32           | 90.9                       |
|                                                   | Colistin (n=11) <sup>d</sup> | >4                                    | >4                | 4 – >4            | 0                          |
|                                                   | Tigecycline                  | 0.5                                   | 1                 | 0.25 – 1          | 100                        |
|                                                   | Levofloxacin                 | 0.06                                  | 1                 | $\leq 0.03$ – >4  | 90.9                       |
| Multidrug–resistant (145)                         | Ceftazidime–avibactam        | 0.5                                   | 2                 | 0.03 – >128       | 96.6                       |
|                                                   | Ceftazidime                  | 128                                   | >128              | 0.5 – >128        | 3.5                        |
|                                                   | Cefepime                     | >16                                   | >16               | $\leq 0.12$ – >16 | 11.0                       |
|                                                   | Aztreonam                    | 64                                    | >128              | 0.06 – >128       | 2.8                        |
|                                                   | Piperacillin–tazobactam      | >128                                  | >128              | 0.5 – >128        | 28.3                       |
|                                                   | Doripenem                    | 0.12                                  | 1                 | 0.03 – >4         | 94.5                       |
|                                                   | Imipenem                     | 0.5                                   | 2                 | 0.06 – >8         | 86.9                       |
|                                                   | Meropenem                    | 0.06                                  | 0.5               | 0.03 – >8         | 93.1                       |
|                                                   | Amikacin                     | 4                                     | >32               | 0.5 – >32         | 82.1                       |
|                                                   | Colistin (n=65) <sup>d</sup> | 0.5                                   | 4                 | 0.25 – >4         | 89.2                       |
|                                                   | Tigecycline                  | 0.5                                   | 2                 | 0.06 – 8          | 93.8                       |
|                                                   | Levofloxacin                 | >4                                    | >4                | $\leq 0.03$ – >4  | 13.8                       |
| Multidrug–resistant, MBL–negative (142)           | Ceftazidime–avibactam        | 0.5                                   | 2                 | 0.03 – 16         | 98.6                       |
|                                                   | Ceftazidime                  | 128                                   | >128              | 0.5 – >128        | 3.5                        |
|                                                   | Cefepime                     | >16                                   | >16               | $\leq 0.12$ – >16 | 11.3                       |
|                                                   | Aztreonam                    | 64                                    | >128              | 0.06 – >128       | 2.1                        |
|                                                   | Piperacillin–tazobactam      | >128                                  | >128              | 0.5 – >128        | 28.2                       |
|                                                   | Doripenem                    | 0.12                                  | 0.5               | 0.03 – >4         | 95.8                       |
|                                                   | Imipenem                     | 0.5                                   | 2                 | 0.06 – >8         | 88.0                       |
|                                                   | Meropenem                    | 0.06                                  | 0.5               | 0.03 – >8         | 93.7                       |
|                                                   | Amikacin                     | 4                                     | >32               | 0.5 – >32         | 81.7                       |
|                                                   | Colistin (n=65) <sup>d</sup> | 0.5                                   | 4                 | 0.25 – >4         | 89.2                       |
|                                                   | Tigecycline                  | 0.5                                   | 2                 | 0.06 – 8          | 93.7                       |
|                                                   | Levofloxacin                 | >4                                    | >4                | $\leq 0.03$ – >4  | 14.1                       |

| Phenotype/Organism (no. of isolates) <sup>a</sup> | Antimicrobial agent              | MIC (µg/ml) <sup>b</sup> |                   |                 | % Susceptible <sup>c</sup> |     |
|---------------------------------------------------|----------------------------------|--------------------------|-------------------|-----------------|----------------------------|-----|
|                                                   |                                  | MIC <sub>50</sub>        | MIC <sub>90</sub> | Range           |                            |     |
| <i>Escherichia coli</i> <sup>f</sup>              |                                  |                          |                   |                 |                            |     |
| All (405)                                         | Ceftazidime–avibactam            | 0.12                     | 0.25              | ≤0.015 – 8      | 100                        |     |
|                                                   | Ceftazidime                      | 0.25                     | 64                | 0.06 – >128     | 70.9                       |     |
|                                                   | Cefepime                         | ≤0.12                    | >16               | ≤0.12 – >16     | 79.5                       |     |
|                                                   | Aztreonam                        | 0.12                     | 64                | ≤0.015 – >128   | 71.1                       |     |
|                                                   | Piperacillin–tazobactam          | 2                        | 16                | 0.5 – >128      | 90.1                       |     |
|                                                   | Doripenem                        | 0.03                     | 0.06              | 0.015 – 1       | 100                        |     |
|                                                   | Imipenem                         | 0.25                     | 0.5               | ≤0.03 – 2       | 99.5                       |     |
|                                                   | Meropenem                        | 0.03                     | 0.06              | ≤0.004 – 2      | 99.5                       |     |
|                                                   | Amikacin                         | 2                        | 4                 | 0.5 – >32       | 99.8                       |     |
|                                                   | Colistin (n=209) <sup>d</sup>    | 0.5                      | 1                 | 0.25 – 4        | 99.5                       |     |
|                                                   | Tigecycline                      | 0.25                     | 0.5               | ≤0.015 – 2      | 100                        |     |
|                                                   | Levofloxacin                     | 0.5                      | >4                | ≤0.03 – >4      | 63.2                       |     |
|                                                   | Ceftazidime-nonsusceptible (118) | Ceftazidime–avibactam    | 0.12              | 0.5             | ≤0.015 – 8                 | 100 |
|                                                   |                                  | Ceftazidime              | 32                | >128            | 8 – >128                   | 0   |
| Cefepime                                          |                                  | 8                        | >16               | ≤0.12 – >16     | 44.1                       |     |
| Aztreonam                                         |                                  | 32                       | 128               | 0.5 – >128      | 11.0                       |     |
| Piperacillin–tazobactam                           |                                  | 4                        | >128              | 1 – >128        | 78.8                       |     |
| Doripenem                                         |                                  | 0.06                     | 0.12              | 0.015 – 1       | 100                        |     |
| Imipenem                                          |                                  | 0.25                     | 1                 | 0.12 – 2        | 98.3                       |     |
| Meropenem                                         |                                  | 0.03                     | 0.12              | ≤0.004 – 2      | 98.3                       |     |
| Amikacin                                          |                                  | 4                        | 4                 | 1 – >32         | 99.2                       |     |
| Colistin (n=69) <sup>d</sup>                      |                                  | 0.5                      | 1                 | 0.25 – 4        | 98.6                       |     |
| Tigecycline                                       |                                  | 0.25                     | 1                 | 0.06 – 2        | 100                        |     |
| Levofloxacin                                      |                                  | >4                       | >4                | ≤0.03 – >4      | 35.6                       |     |
| Meropenem-nonsusceptible (2)                      |                                  | Ceftazidime–avibactam    | — <sup>b</sup>    | —               | 1 – 2                      | 100 |
|                                                   |                                  | Ceftazidime              | —                 | —               | >128 – >128                | 0   |
|                                                   | Cefepime                         | —                        | —                 | >16 – >16       | 0                          |     |
|                                                   | Aztreonam                        | —                        | —                 | 32 – >128       | 0                          |     |
|                                                   | Piperacillin–tazobactam          | —                        | —                 | 32 – >128       | 0                          |     |
|                                                   | Doripenem                        | —                        | —                 | 1 – 1           | 100                        |     |
|                                                   | Imipenem                         | —                        | —                 | 0.25 – 0.25     | 100                        |     |
|                                                   | Meropenem                        | —                        | —                 | 2 – 2           | 0                          |     |
|                                                   | Amikacin                         | —                        | —                 | 2 – 16          | 100                        |     |
|                                                   | Colistin (n=0) <sup>d</sup>      | —                        | —                 | ND <sup>g</sup> | ND                         |     |
|                                                   | Tigecycline                      | —                        | —                 | 0.12 – 1        | 100                        |     |
|                                                   | Levofloxacin                     | —                        | —                 | >4 – >4         | 0                          |     |
|                                                   | Colistin-resistant (1)           | Ceftazidime–avibactam    | — <sup>b</sup>    | —               | 0.25                       | 100 |
|                                                   |                                  | Ceftazidime              | —                 | —               | 32                         | 0   |
| Cefepime                                          |                                  | —                        | —                 | 8               | 0                          |     |
| Aztreonam                                         |                                  | —                        | —                 | 16              | 0                          |     |
| Piperacillin–tazobactam                           |                                  | —                        | —                 | 2               | 100                        |     |
| Doripenem                                         |                                  | —                        | —                 | 0.06            | 100                        |     |
| Imipenem                                          |                                  | —                        | —                 | 0.5             | 100                        |     |
| Meropenem                                         |                                  | —                        | —                 | 0.06            | 100                        |     |
| Amikacin                                          |                                  | —                        | —                 | 2               | 100                        |     |
| Colistin (n=1) <sup>d</sup>                       |                                  | —                        | —                 | 4               | 0                          |     |
| Tigecycline                                       |                                  | —                        | —                 | 0.25            | 100                        |     |
| Levofloxacin                                      |                                  | —                        | —                 | 1               | 100                        |     |
| Multidrug-resistant (52)                          |                                  | Ceftazidime–avibactam    | 0.25              | 1               | 0.03 – 8                   | 100 |
|                                                   |                                  | Ceftazidime              | 64                | >128            | 4 – >128                   | 3.9 |
|                                                   | Cefepime                         | >16                      | >16               | 1 – >16         | 7.7                        |     |
|                                                   | Aztreonam                        | 64                       | >128              | 16 – >128       | 0                          |     |
|                                                   | Piperacillin–tazobactam          | 16                       | >128              | 2 – >128        | 61.5                       |     |
|                                                   | Doripenem                        | 0.06                     | 0.12              | 0.03 – 1        | 100                        |     |
|                                                   | Imipenem                         | 0.25                     | 0.5               | 0.12 – 1        | 100                        |     |
|                                                   | Meropenem                        | 0.06                     | 0.12              | 0.03 – 2        | 96.2                       |     |
|                                                   | Amikacin                         | 4                        | 8                 | 1 – >32         | 98.1                       |     |
|                                                   | Colistin (n=23) <sup>d</sup>     | 0.5                      | 1                 | 0.25 – 1        | 100                        |     |
|                                                   | Tigecycline                      | 0.25                     | 1                 | 0.12 – 1        | 100                        |     |

| Phenotype/Organism (no. of isolates) <sup>a</sup> | Antimicrobial agent           | MIC ( $\mu\text{g/ml}$ ) <sup>b</sup> |                   |               | % Susceptible <sup>c</sup> |
|---------------------------------------------------|-------------------------------|---------------------------------------|-------------------|---------------|----------------------------|
|                                                   |                               | MIC <sub>50</sub>                     | MIC <sub>90</sub> | Range         |                            |
|                                                   | Levofloxacin                  | >4                                    | >4                | 0.06 – >4     | 3.9                        |
| <i>Klebsiella pneumoniae</i>                      |                               |                                       |                   |               |                            |
| All (351)                                         | Ceftazidime–avibactam         | 0.12                                  | 1                 | ≤0.015 – 128  | 99.2                       |
|                                                   | Ceftazidime                   | 0.25                                  | >128              | ≤0.015 – >128 | 71.5                       |
|                                                   | Cefepime                      | ≤0.12                                 | >16               | ≤0.12 – >16   | 78.4                       |
|                                                   | Aztreonam                     | 0.06                                  | >128              | ≤0.015 – >128 | 74.4                       |
|                                                   | Piperacillin–tazobactam       | 4                                     | >128              | ≤0.25 – >128  | 75.8                       |
|                                                   | Doripenem                     | 0.06                                  | 0.25              | 0.015 – >4    | 98.6                       |
|                                                   | Imipenem                      | 0.25                                  | 1                 | 0.06 – >8     | 94.6                       |
|                                                   | Meropenem                     | 0.03                                  | 0.12              | 0.015 – >8    | 98.3                       |
|                                                   | Amikacin                      | 1                                     | 4                 | ≤0.25 – >32   | 95.7                       |
|                                                   | Colistin (n=207) <sup>d</sup> | 0.5                                   | 1                 | ≤0.12 – >4    | 99.5                       |
|                                                   | Tigecycline                   | 0.5                                   | 2                 | 0.06 – 8      | 96.3                       |
|                                                   | Levofloxacin                  | 0.12                                  | >4                | ≤0.03 – >4    | 77.8                       |
| All, MBL–negative (350)                           | Ceftazidime–avibactam         | 0.12                                  | 1                 | ≤0.015 – 16   | 99.4                       |
|                                                   | Ceftazidime                   | 0.25                                  | >128              | ≤0.015 – >128 | 71.7                       |
|                                                   | Cefepime                      | ≤0.12                                 | >16               | ≤0.12 – >16   | 78.6                       |
|                                                   | Aztreonam                     | 0.06                                  | >128              | ≤0.015 – >128 | 74.3                       |
|                                                   | Piperacillin–tazobactam       | 4                                     | >128              | ≤0.25 – >128  | 75.7                       |
|                                                   | Doripenem                     | 0.06                                  | 0.25              | 0.015 – >4    | 98.6                       |
|                                                   | Imipenem                      | 0.25                                  | 1                 | 0.06 – >8     | 94.6                       |
|                                                   | Meropenem                     | 0.03                                  | 0.06              | 0.015 – >8    | 98.3                       |
|                                                   | Amikacin                      | 1                                     | 4                 | ≤0.25 – >32   | 95.7                       |
|                                                   | Colistin (n=207) <sup>d</sup> | 0.5                                   | 1                 | 0.12 – >4     | 99.5                       |
|                                                   | Tigecycline                   | 0.5                                   | 2                 | 0.06 – 8      | 96.3                       |
|                                                   | Levofloxacin                  | 0.12                                  | >4                | ≤0.03 – >4    | 77.7                       |
| Ceftazidime-nonsusceptible (100)                  | Ceftazidime–avibactam         | 0.5                                   | 2                 | 0.03 – 128    | 97.0                       |
|                                                   | Ceftazidime                   | 128                                   | >128              | 8 – >128      | 0                          |
|                                                   | Cefepime                      | 16                                    | >16               | ≤0.12 – >16   | 27.0                       |
|                                                   | Aztreonam                     | 64                                    | >128              | 0.06 – >128   | 11.0                       |
|                                                   | Piperacillin–tazobactam       | >128                                  | >128              | 2 – >128      | 23.0                       |
|                                                   | Doripenem                     | 0.12                                  | 1                 | 0.03 – >4     | 95.0                       |
|                                                   | Imipenem                      | 0.5                                   | 2                 | 0.06 – >8     | 83.0                       |
|                                                   | Meropenem                     | 0.06                                  | 0.5               | 0.03 – >8     | 94.0                       |
|                                                   | Amikacin                      | 2                                     | >32               | 0.5 – >32     | 85.0                       |
|                                                   | Colistin (n=54) <sup>d</sup>  | 1                                     | 2                 | 0.25 – >4     | 98.2                       |
|                                                   | Tigecycline                   | 1                                     | 2                 | 0.06 – 8      | 95.0                       |
|                                                   | Levofloxacin                  | >4                                    | >4                | ≤0.03 – >4    | 35.0                       |
| Ceftazidime-nonsusceptible, MBL–negative (99)     | Ceftazidime–avibactam         | 0.5                                   | 2                 | 0.03 – 16     | 98.0                       |
|                                                   | Ceftazidime                   | 128                                   | >128              | 8 – >128      | 0                          |
|                                                   | Cefepime                      | 16                                    | >16               | ≤0.12 – >16   | 27.3                       |
|                                                   | Aztreonam                     | 64                                    | >128              | 0.5 – >128    | 10.1                       |
|                                                   | Piperacillin–tazobactam       | >128                                  | >128              | 2 – >128      | 22.2                       |
|                                                   | Doripenem                     | 0.12                                  | 1                 | 0.03 – >4     | 95.0                       |
|                                                   | Imipenem                      | 0.5                                   | 2                 | 0.06 – >8     | 82.8                       |
|                                                   | Meropenem                     | 0.06                                  | 0.5               | 0.03 – >8     | 93.9                       |
|                                                   | Amikacin                      | 2                                     | >32               | 0.5 – >32     | 84.9                       |
|                                                   | Colistin (n=54) <sup>d</sup>  | 1                                     | 2                 | 0.25 – >4     | 98.2                       |
|                                                   | Tigecycline                   | 1                                     | 2                 | 0.06 – 8      | 95.0                       |
|                                                   | Levofloxacin                  | >4                                    | >4                | ≤0.03 – >4    | 34.3                       |
| Meropenem-nonsusceptible (6) <sup>f</sup>         | Ceftazidime–avibactam         | — <sup>b</sup>                        | —                 | 0.5 – 16      | 83.3                       |
|                                                   | Ceftazidime                   | —                                     | —                 | 32 – >128     | 0                          |
|                                                   | Cefepime                      | —                                     | —                 | 8 – >16       | 0                          |
|                                                   | Aztreonam                     | —                                     | —                 | 64 – >128     | 0                          |
|                                                   | Piperacillin–tazobactam       | —                                     | —                 | >128 – >128   | 0                          |
|                                                   | Doripenem                     | —                                     | —                 | 1 – >4        | 16.7                       |
|                                                   | Imipenem                      | —                                     | —                 | 1 – >8        | 16.7                       |
|                                                   | Meropenem                     | —                                     | —                 | 2 – >8        | 0                          |
|                                                   | Amikacin                      | —                                     | —                 | 1 – 32        | 83.3                       |

| Phenotype/Organism (no. of isolates) <sup>a</sup> | Antimicrobial agent                   | MIC ( $\mu\text{g/ml}$ ) <sup>b</sup> |                   |               | % Susceptible <sup>c</sup> |      |
|---------------------------------------------------|---------------------------------------|---------------------------------------|-------------------|---------------|----------------------------|------|
|                                                   |                                       | MIC <sub>50</sub>                     | MIC <sub>90</sub> | Range         |                            |      |
|                                                   | Colistin (n=6) <sup>d</sup>           | —                                     | —                 | 0.25 – 2      | 100                        |      |
|                                                   | Tigecycline                           | —                                     | —                 | 0.5 – 4       | 66.7                       |      |
|                                                   | Levofloxacin                          | —                                     | —                 | 2 – >4        | 16.7                       |      |
| Colistin-resistant (1) <sup>f</sup>               | Ceftazidime–avibactam                 | — <sup>b</sup>                        | —                 | 0.5           | 100                        |      |
|                                                   | Ceftazidime                           | —                                     | —                 | 128           | 0                          |      |
|                                                   | Cefepime                              | —                                     | —                 | 0.25          | 100                        |      |
|                                                   | Aztreonam                             | —                                     | —                 | 8             | 0                          |      |
|                                                   | Piperacillin–tazobactam               | —                                     | —                 | 64            | 0                          |      |
|                                                   | Doripenem                             | —                                     | —                 | 0.12          | 100                        |      |
|                                                   | Imipenem                              | —                                     | —                 | 0.5           | 100                        |      |
|                                                   | Meropenem                             | —                                     | —                 | 0.12          | 100                        |      |
|                                                   | Amikacin                              | —                                     | —                 | >32           | 0                          |      |
|                                                   | Colistin (n=1) <sup>d</sup>           | —                                     | —                 | >4            | 0                          |      |
|                                                   | Tigecycline                           | —                                     | —                 | 0.5           | 100                        |      |
|                                                   | Levofloxacin                          | —                                     | —                 | >4            | 0                          |      |
|                                                   | Multidrug-resistant (63) <sup>f</sup> | Ceftazidime–avibactam                 | 1                 | 2             | 0.06 – 16                  | 96.8 |
| Ceftazidime                                       |                                       | >128                                  | >128              | 16 – >128     | 0                          |      |
| Cefepime                                          |                                       | >16                                   | >16               | ≤0.12 – >16   | 7.9                        |      |
| Aztreonam                                         |                                       | 128                                   | >128              | 8 – >128      | 0                          |      |
| Piperacillin–tazobactam                           |                                       | >128                                  | >128              | 16 – >128     | 6.4                        |      |
| Doripenem                                         |                                       | 0.12                                  | 1                 | 0.03 – >4     | 92.1                       |      |
| Imipenem                                          |                                       | 0.5                                   | 2                 | 0.06 – >8     | 81.0                       |      |
| Meropenem                                         |                                       | 0.06                                  | 1                 | 0.03 – >8     | 90.5                       |      |
| Amikacin                                          |                                       | 2                                     | >32               | 0.5 – >32     | 77.8                       |      |
| Colistin (n=29) <sup>d</sup>                      |                                       | 1                                     | 2                 | 0.25 – >4     | 96.6                       |      |
| Tigecycline                                       |                                       | 1                                     | 2                 | 0.06 – 8      | 93.7                       |      |
| Levofloxacin                                      |                                       | >4                                    | >4                | ≤0.03 – >4    | 14.3                       |      |
| <i>Klebsiella oxytoca</i> <sup>f</sup>            |                                       |                                       |                   |               |                            |      |
| All (68)                                          |                                       | Ceftazidime–avibactam                 | 0.12              | 0.25          | ≤0.015 – 1                 | 100  |
|                                                   | Ceftazidime                           | 0.12                                  | 32                | 0.06 – >128   | 83.8                       |      |
|                                                   | Cefepime                              | ≤0.12                                 | 1                 | ≤0.12 – 16    | 94.1                       |      |
|                                                   | Aztreonam                             | 0.25                                  | 64                | ≤0.015 – >128 | 79.4                       |      |
|                                                   | Piperacillin–tazobactam               | 2                                     | 16                | ≤0.25 – >128  | 91.2                       |      |
|                                                   | Doripenem                             | 0.06                                  | 0.06              | 0.03 – 0.12   | 100                        |      |
|                                                   | Imipenem                              | 0.25                                  | 0.5               | 0.12 – 1      | 100                        |      |
|                                                   | Meropenem                             | 0.03                                  | 0.06              | 0.03 – 0.12   | 100                        |      |
|                                                   | Amikacin                              | 1                                     | 2                 | 0.5 – 16      | 100                        |      |
|                                                   | Colistin (n=35) <sup>d</sup>          | 0.5                                   | 1                 | 0.25 – 1      | 100                        |      |
|                                                   | Tigecycline                           | 0.25                                  | 1                 | 0.06 – 2      | 100                        |      |
|                                                   | Levofloxacin                          | 0.06                                  | 0.5               | ≤0.03 – 4     | 97.1                       |      |
|                                                   | Ceftazidime-nonsusceptible (11)       | Ceftazidime–avibactam                 | 0.25              | 1             | 0.03 – 1                   | 100  |
|                                                   |                                       | Ceftazidime                           | 64                | >128          | 16 – >128                  | 0    |
| Cefepime                                          |                                       | 1                                     | 16                | ≤0.12 – 16    | 63.6                       |      |
| Aztreonam                                         |                                       | 64                                    | >128              | 32 – >128     | 0                          |      |
| Piperacillin–tazobactam                           |                                       | 2                                     | 128               | 1 – >128      | 72.7                       |      |
| Doripenem                                         |                                       | 0.06                                  | 0.06              | 0.03 – 0.06   | 100                        |      |
| Imipenem                                          |                                       | 0.25                                  | 1                 | 0.12 – 1      | 100                        |      |
| Meropenem                                         |                                       | 0.03                                  | 0.06              | 0.03 – 0.06   | 100                        |      |
| Amikacin                                          |                                       | 1                                     | 2                 | 0.5 – 4       | 100                        |      |
| Colistin (n=7) <sup>d</sup>                       |                                       | — <sup>b</sup>                        | —                 | 0.25 – 1      | 100                        |      |
| Tigecycline                                       |                                       | 0.25                                  | 1                 | 0.06 – 2      | 100                        |      |
| Levofloxacin                                      |                                       | 0.5                                   | 4                 | ≤0.03 – 4     | 81.8                       |      |
| Multidrug-resistant (1)                           |                                       | Ceftazidime–avibactam                 | — <sup>b</sup>    | —             | 0.5                        | 100  |
|                                                   | Ceftazidime                           | —                                     | —                 | >128          | 0                          |      |
|                                                   | Cefepime                              | —                                     | —                 | 16            | 0                          |      |
|                                                   | Aztreonam                             | —                                     | —                 | >128          | 0                          |      |
|                                                   | Piperacillin–tazobactam               | —                                     | —                 | >128          | 0                          |      |
|                                                   | Doripenem                             | —                                     | —                 | 0.03          | 100                        |      |
|                                                   | Imipenem                              | —                                     | —                 | 0.12          | 100                        |      |

| Phenotype/Organism (no. of isolates) <sup>a</sup> | Antimicrobial agent          | MIC ( $\mu\text{g/ml}$ ) <sup>b</sup> |                   |                       | % Susceptible <sup>c</sup> |
|---------------------------------------------------|------------------------------|---------------------------------------|-------------------|-----------------------|----------------------------|
|                                                   |                              | MIC <sub>50</sub>                     | MIC <sub>90</sub> | Range                 |                            |
|                                                   | Meropenem                    | —                                     | —                 | 0.03                  | 100                        |
|                                                   | Amikacin                     | —                                     | —                 | 1                     | 100                        |
|                                                   | Colistin (n=1) <sup>d</sup>  | —                                     | —                 | 0.5                   | 100                        |
|                                                   | Tigecycline                  | —                                     | —                 | 0.25                  | 100                        |
|                                                   | Levofloxacin                 | —                                     | —                 | 0.5                   | 100                        |
| <i>Enterobacter</i> spp.                          |                              |                                       |                   |                       |                            |
| All (146) <sup>b</sup>                            | Ceftazidime–avibactam        | 0.25                                  | 1                 | $\leq 0.015$ – $>128$ | 98.6                       |
|                                                   | Ceftazidime                  | 0.5                                   | 128               | 0.06 – $>128$         | 62.3                       |
|                                                   | Cefepime                     | $\leq 0.12$                           | 8                 | $\leq 0.12$ – $>16$   | 88.4                       |
|                                                   | Aztreonam                    | 0.25                                  | 128               | $\leq 0.015$ – $>128$ | 65.8                       |
|                                                   | Piperacillin–tazobactam      | 4                                     | $>128$            | 0.5 – $>128$          | 73.3                       |
|                                                   | Doripenem                    | 0.06                                  | 0.25              | 0.03 – 4              | 98.0                       |
|                                                   | Imipenem                     | 1                                     | 2                 | 0.25 – 8              | 77.4                       |
|                                                   | Meropenem                    | 0.06                                  | 0.12              | 0.015 – 2             | 99.3                       |
|                                                   | Amikacin                     | 1                                     | 2                 | 0.5 – $>32$           | 98.0                       |
|                                                   | Colistin (n=79) <sup>d</sup> | 0.5                                   | 4                 | 0.25 – $>4$           | 89.9                       |
|                                                   | Tigecycline                  | 0.5                                   | 2                 | 0.12 – 8              | 96.6                       |
|                                                   | Levofloxacin                 | 0.06                                  | 2                 | $\leq 0.03$ – $>4$    | 91.8                       |
| All, MBL–negative (144)                           | Ceftazidime–avibactam        | 0.25                                  | 1                 | $\leq 0.015$ – 4      | 100                        |
|                                                   | Ceftazidime                  | 0.5                                   | 128               | 0.06 – $>128$         | 63.2                       |
|                                                   | Cefepime                     | $\leq 0.12$                           | 4                 | $\leq 0.12$ – $>16$   | 89.6                       |
|                                                   | Aztreonam                    | 0.12                                  | 64                | $\leq 0.015$ – $>128$ | 66.7                       |
|                                                   | Piperacillin–tazobactam      | 4                                     | $>128$            | 0.5 – $>128$          | 72.9                       |
|                                                   | Doripenem                    | 0.06                                  | 0.25              | 0.03 – 2              | 99.3                       |
|                                                   | Imipenem                     | 1                                     | 2                 | 0.25 – 4              | 78.5                       |
|                                                   | Meropenem                    | 0.06                                  | 0.12              | 0.015 – 1             | 100                        |
|                                                   | Amikacin                     | 1                                     | 2                 | 0.5 – $>32$           | 97.9                       |
|                                                   | Colistin (n=79) <sup>d</sup> | 0.5                                   | 4                 | 0.25 – $>4$           | 89.9                       |
|                                                   | Tigecycline                  | 0.5                                   | 2                 | 0.12 – 8              | 96.5                       |
|                                                   | Levofloxacin                 | 0.06                                  | 2                 | $\leq 0.03$ – $>4$    | 92.4                       |
| Ceftazidime-nonsusceptible (55)                   | Ceftazidime–avibactam        | 0.5                                   | 1                 | $\leq 0.015$ – $>128$ | 96.4                       |
|                                                   | Ceftazidime                  | 64                                    | $>128$            | 8 – $>128$            | 0                          |
|                                                   | Cefepime                     | 1                                     | $>16$             | $\leq 0.12$ – $>16$   | 70.9                       |
|                                                   | Aztreonam                    | 64                                    | $>128$            | 0.5 – $>128$          | 9.1                        |
|                                                   | Piperacillin–tazobactam      | 64                                    | $>128$            | 2 – $>128$            | 29.1                       |
|                                                   | Doripenem                    | 0.12                                  | 0.5               | 0.06 – 4              | 96.4                       |
|                                                   | Imipenem                     | 1                                     | 2                 | 0.25 – 8              | 85.5                       |
|                                                   | Meropenem                    | 0.12                                  | 0.25              | 0.06 – 2              | 98.2                       |
|                                                   | Amikacin                     | 2                                     | 4                 | 0.5 – $>32$           | 94.6                       |
|                                                   | Colistin (n=31) <sup>d</sup> | 0.5                                   | 4                 | 0.25 – $>4$           | 87.1                       |
|                                                   | Tigecycline                  | 1                                     | 2                 | 0.25 – 8              | 92.7                       |
|                                                   | Levofloxacin                 | 0.5                                   | $>4$              | $\leq 0.03$ – $>4$    | 83.6                       |
| Ceftazidime-nonsusceptible, MBL–negative (53)     | Ceftazidime–avibactam        | 0.5                                   | 1                 | $\leq 0.015$ – 4      | 100                        |
|                                                   | Ceftazidime                  | 64                                    | $>128$            | 8 – $>128$            | 0                          |
|                                                   | Cefepime                     | 1                                     | $>16$             | $\leq 0.12$ – $>16$   | 73.6                       |
|                                                   | Aztreonam                    | 64                                    | $>128$            | 0.5 – $>128$          | 9.4                        |
|                                                   | Piperacillin–tazobactam      | 64                                    | $>128$            | 2 – $>128$            | 26.4                       |
|                                                   | Doripenem                    | 0.12                                  | 0.25              | 0.06 – 1              | 100                        |
|                                                   | Imipenem                     | 1                                     | 2                 | 0.25 – 2              | 88.7                       |
|                                                   | Meropenem                    | 0.12                                  | 0.25              | 0.06 – 0.25           | 100                        |
|                                                   | Amikacin                     | 2                                     | 4                 | 0.5 – $>32$           | 94.3                       |
|                                                   | Colistin (n=31) <sup>d</sup> | 0.5                                   | 4                 | 0.25 – $>4$           | 87.1                       |
|                                                   | Tigecycline                  | 1                                     | 2                 | 0.25 – 8              | 92.5                       |
|                                                   | Levofloxacin                 | 0.12                                  | $>4$              | $\leq 0.03$ – $>4$    | 84.9                       |
| Meropenem-nonsusceptible (1) <sup>i</sup>         | Ceftazidime–avibactam        | — <sup>b</sup>                        | —                 | $>128$                | 0                          |
|                                                   | Ceftazidime                  | —                                     | —                 | $>128$                | 0                          |
|                                                   | Cefepime                     | —                                     | —                 | 16                    | 0                          |
|                                                   | Aztreonam                    | —                                     | —                 | $>128$                | 0                          |
|                                                   | Piperacillin–tazobactam      | —                                     | —                 | 16                    | 100                        |



| Phenotype/Organism (no. of isolates) <sup>a</sup> | Antimicrobial agent          | MIC ( $\mu\text{g/ml}$ ) <sup>b</sup> |                   |                 | % Susceptible <sup>c</sup> |
|---------------------------------------------------|------------------------------|---------------------------------------|-------------------|-----------------|----------------------------|
|                                                   |                              | MIC <sub>50</sub>                     | MIC <sub>90</sub> | Range           |                            |
|                                                   | Doripenem                    | —                                     | —                 | 4               | 0                          |
|                                                   | Imipenem                     | —                                     | —                 | 8               | 0                          |
|                                                   | Meropenem                    | —                                     | —                 | 2               | 0                          |
|                                                   | Amikacin                     | —                                     | —                 | 1               | 100                        |
|                                                   | Colistin (n=0) <sup>d</sup>  | —                                     | —                 | ND <sup>e</sup> | ND                         |
|                                                   | Tigecycline                  | —                                     | —                 | 2               | 100                        |
|                                                   | Levofloxacin                 | —                                     | —                 | 4               | 0                          |
| Colistin-resistant (8) <sup>f</sup>               | Ceftazidime–avibactam        | — <sup>b</sup>                        | —                 | 0.03 – 1        | 100                        |
|                                                   | Ceftazidime                  | —                                     | —                 | 0.12 – 128      | 50.0                       |
|                                                   | Cefepime                     | —                                     | —                 | ≤0.12 – 0.5     | 100                        |
|                                                   | Aztreonam                    | —                                     | —                 | 0.06 – 64       | 50.0                       |
|                                                   | Piperacillin–tazobactam      | —                                     | —                 | 1 – >128        | 62.5                       |
|                                                   | Doripenem                    | —                                     | —                 | 0.03 – 0.5      | 100                        |
|                                                   | Imipenem                     | —                                     | —                 | 0.5 – 1         | 100                        |
|                                                   | Meropenem                    | —                                     | —                 | 0.03 – 0.12     | 100                        |
|                                                   | Amikacin                     | —                                     | —                 | 1 – 2           | 100                        |
|                                                   | Colistin (n=8) <sup>d</sup>  | —                                     | —                 | 4 – >4          | 0                          |
|                                                   | Tigecycline                  | —                                     | —                 | 0.5 – 1         | 100                        |
|                                                   | Levofloxacin                 | —                                     | —                 | ≤0.03 – 0.12    | 100                        |
| Multidrug-resistant (14) <sup>f</sup>             | Ceftazidime–avibactam        | 1                                     | 2                 | 0.25 – 4        | 100                        |
|                                                   | Ceftazidime                  | >128                                  | >128              | 64 – >128       | 0                          |
|                                                   | Cefepime                     | 16                                    | >16               | 0.5 – >16       | 28.6                       |
|                                                   | Aztreonam                    | 128                                   | >128              | 64 – >128       | 0                          |
|                                                   | Piperacillin–tazobactam      | >128                                  | >128              | 16 – >128       | 7.1                        |
|                                                   | Doripenem                    | 0.12                                  | 0.5               | 0.06 – 1        | 100                        |
|                                                   | Imipenem                     | 1                                     | 2                 | 0.5 – 2         | 85.7                       |
|                                                   | Meropenem                    | 0.12                                  | 0.25              | 0.06 – 0.25     | 100                        |
|                                                   | Amikacin                     | 2                                     | 32                | 1 – 32          | 85.7                       |
|                                                   | Colistin (n=8) <sup>d</sup>  | — <sup>b</sup>                        | —                 | 0.25 – >4       | 75.0                       |
|                                                   | Tigecycline                  | 1                                     | 4                 | 0.5 – 8         | 78.6                       |
|                                                   | Levofloxacin                 | 1                                     | >4                | ≤0.03 – >4      | 50.0                       |
| <i>Citrobacter</i> spp.                           |                              |                                       |                   |                 |                            |
| All (82) <sup>j</sup>                             | Ceftazidime–avibactam        | 0.12                                  | 2                 | ≤0.015 – >128   | 93.9                       |
|                                                   | Ceftazidime                  | 0.25                                  | >128              | 0.06 – >128     | 65.9                       |
|                                                   | Cefepime                     | ≤0.12                                 | 16                | ≤0.12 – >16     | 85.4                       |
|                                                   | Aztreonam                    | 0.06                                  | 64                | ≤0.015 – >128   | 67.1                       |
|                                                   | Piperacillin–tazobactam      | 4                                     | 128               | ≤0.25 – >128    | 75.6                       |
|                                                   | Doripenem                    | 0.06                                  | 0.25              | 0.015 – 4       | 96.3                       |
|                                                   | Imipenem                     | 0.25                                  | 1                 | 0.12 – >8       | 93.9                       |
|                                                   | Meropenem                    | 0.03                                  | 0.12              | 0.015 – 8       | 97.6                       |
|                                                   | Amikacin                     | 1                                     | 8                 | ≤0.25 – >32     | 91.5                       |
|                                                   | Colistin (n=41) <sup>d</sup> | 0.5                                   | 1                 | ≤0.12 – >4      | 97.6                       |
|                                                   | Tigecycline                  | 0.5                                   | 1                 | 0.06 – 2        | 100                        |
|                                                   | Levofloxacin                 | 0.06                                  | 4                 | ≤0.03 – >4      | 85.4                       |
| All, MBL-negative (79)                            | Ceftazidime–avibactam        | 0.12                                  | 2                 | ≤0.015 – >128   | 97.5                       |
|                                                   | Ceftazidime                  | 0.25                                  | >128              | 0.06 – >128     | 68.4                       |
|                                                   | Cefepime                     | ≤0.12                                 | 8                 | ≤0.12 – >16     | 88.6                       |
|                                                   | Aztreonam                    | 0.06                                  | 64                | ≤0.015 – >128   | 69.6                       |
|                                                   | Piperacillin–tazobactam      | 4                                     | >128              | ≤0.25 – >128    | 77.2                       |
|                                                   | Doripenem                    | 0.06                                  | 0.12              | 0.015 – 2       | 98.7                       |
|                                                   | Imipenem                     | 0.25                                  | 1                 | 0.12 – >8       | 96.2                       |
|                                                   | Meropenem                    | 0.03                                  | 0.12              | 0.015 – 8       | 98.7                       |
|                                                   | Amikacin                     | 1                                     | 16                | ≤0.25 – >32     | 91.1                       |
|                                                   | Colistin (n=41) <sup>d</sup> | 0.5                                   | 1                 | 0.12 – >4       | 97.6                       |
|                                                   | Tigecycline                  | 0.5                                   | 1                 | 0.06 – 2        | 100.0                      |
|                                                   | Levofloxacin                 | 0.06                                  | 4                 | ≤0.03 – >4      | 87.3                       |
| Ceftazidime-nonsusceptible (28)                   | Ceftazidime–avibactam        | 0.5                                   | 64                | 0.06 – >128     | 82.1                       |
|                                                   | Ceftazidime                  | 128                                   | >128              | 8 – >128        | 0                          |
|                                                   | Cefepime                     | 2                                     | >16               | ≤0.12 – >16     | 57.1                       |

| Phenotype/Organism (no. of isolates) <sup>a</sup> | Antimicrobial agent         | MIC ( $\mu\text{g/ml}$ ) <sup>b</sup> |                   |                 | % Susceptible <sup>c</sup> |
|---------------------------------------------------|-----------------------------|---------------------------------------|-------------------|-----------------|----------------------------|
|                                                   |                             | MIC <sub>50</sub>                     | MIC <sub>90</sub> | Range           |                            |
|                                                   | Aztreonam                   | 32                                    | >128              | 4 – >128        | 3.6                        |
|                                                   | Piperacillin–tazobactam     | 64                                    | >128              | 4 – >128        | 32.1                       |
|                                                   | Doripenem                   | 0.12                                  | 2                 | 0.015 – 4       | 89.3                       |
|                                                   | Imipenem                    | 0.5                                   | 2                 | 0.25 – >8       | 85.7                       |
|                                                   | Meropenem                   | 0.06                                  | 0.5               | 0.015 – 8       | 92.9                       |
|                                                   | Amikacin                    | 2                                     | >32               | 0.5 – >32       | 75.0                       |
|                                                   | Colistin (n=5) <sup>d</sup> | — <sup>b</sup>                        | —                 | 0.25 – 1        | 100                        |
|                                                   | Tigecycline                 | 0.5                                   | 1                 | 0.12 – 2        | 100                        |
|                                                   | Levofloxacin                | 2                                     | >4                | ≤0.03 – >4      | 64.3                       |
| Ceftazidime-nonsusceptible, MBL–negative (25)     | Ceftazidime–avibactam       | 0.5                                   | 4                 | 0.06 – >128     | 92.0                       |
|                                                   | Ceftazidime                 | 128                                   | >128              | 8 – >128        | 0                          |
|                                                   | Cefepime                    | 1                                     | >16               | ≤0.12 – >16     | 64.0                       |
|                                                   | Aztreonam                   | 32                                    | >128              | 4 – >128        | 4.0                        |
|                                                   | Piperacillin–tazobactam     | 64                                    | >128              | 4 – >128        | 32.0                       |
|                                                   | Doripenem                   | 0.06                                  | 0.5               | 0.015 – 2       | 96.0                       |
|                                                   | Imipenem                    | 0.5                                   | 1                 | 0.25 – >8       | 92.0                       |
|                                                   | Meropenem                   | 0.06                                  | 0.5               | 0.015 – 8       | 96.0                       |
|                                                   | Amikacin                    | 2                                     | >32               | 0.5 – >32       | 72.0                       |
|                                                   | Colistin (n=5) <sup>d</sup> | — <sup>b</sup>                        | —                 | 0.25 – 1        | 100                        |
|                                                   | Tigecycline                 | 0.5                                   | 1                 | 0.12 – 2        | 100                        |
|                                                   | Levofloxacin                | 1                                     | >4                | ≤0.03 – >4      | 68.0                       |
| Meropenem-nonsusceptible (2)                      | Ceftazidime–avibactam       | — <sup>b</sup>                        | —                 | 4 – >128        | 50.0                       |
|                                                   | Ceftazidime                 | —                                     | —                 | >128 – >128     | 0                          |
|                                                   | Cefepime                    | —                                     | —                 | >16 – >16       | 0                          |
|                                                   | Aztreonam                   | —                                     | —                 | 128 – >128      | 0                          |
|                                                   | Piperacillin–tazobactam     | —                                     | —                 | 16 – >128       | 50.0                       |
|                                                   | Doripenem                   | —                                     | —                 | 2 – 4           | 0                          |
|                                                   | Imipenem                    | —                                     | —                 | 4 – >8          | 0                          |
|                                                   | Meropenem                   | —                                     | —                 | 2 – 8           | 0                          |
|                                                   | Amikacin                    | —                                     | —                 | 4 – >32         | 50.0                       |
|                                                   | Colistin (n=0) <sup>d</sup> | —                                     | —                 | ND <sup>e</sup> | ND                         |
|                                                   | Tigecycline                 | —                                     | —                 | 0.5 – 0.5       | 100                        |
|                                                   | Levofloxacin                | —                                     | —                 | 0.5 – >4        | 50.0                       |
| Meropenem-nonsusceptible, MBL–negative (1)        | Ceftazidime–avibactam       | — <sup>b</sup>                        | —                 | 4               | 100                        |
|                                                   | Ceftazidime                 | —                                     | —                 | >128            | 0                          |
|                                                   | Cefepime                    | —                                     | —                 | >16             | 0                          |
|                                                   | Aztreonam                   | —                                     | —                 | >128            | 0                          |
|                                                   | Piperacillin–tazobactam     | —                                     | —                 | >128            | 0                          |
|                                                   | Doripenem                   | —                                     | —                 | 2               | 0                          |
|                                                   | Imipenem                    | —                                     | —                 | >8              | 0                          |
|                                                   | Meropenem                   | —                                     | —                 | 8               | 0                          |
|                                                   | Amikacin                    | —                                     | —                 | >32             | 0                          |
|                                                   | Colistin (n=0) <sup>d</sup> | —                                     | —                 | ND <sup>e</sup> | ND                         |
|                                                   | Tigecycline                 | —                                     | —                 | 0.5             | 100                        |
|                                                   | Levofloxacin                | —                                     | —                 | >4              | 0                          |
| Colistin–resistant (1) <sup>f</sup>               | Ceftazidime–avibactam       | — <sup>b</sup>                        | —                 | ≤0.015          | 100                        |
|                                                   | Ceftazidime                 | —                                     | —                 | 0.06            | 100                        |
|                                                   | Cefepime                    | —                                     | —                 | ≤0.12           | 100                        |
|                                                   | Aztreonam                   | —                                     | —                 | ≤0.015          | 100                        |
|                                                   | Piperacillin–tazobactam     | —                                     | —                 | 0.5             | 100                        |
|                                                   | Doripenem                   | —                                     | —                 | 0.25            | 100                        |
|                                                   | Imipenem                    | —                                     | —                 | 4               | 0                          |
|                                                   | Meropenem                   | —                                     | —                 | 0.12            | 100                        |
|                                                   | Amikacin                    | —                                     | —                 | 2               | 100                        |
|                                                   | Colistin (n=1) <sup>d</sup> | —                                     | —                 | >4              | 0                          |
|                                                   | Tigecycline                 | —                                     | —                 | 1               | 100                        |
|                                                   | Levofloxacin                | —                                     | —                 | 0.12            | 100                        |
| Multidrug–resistant (9)                           | Ceftazidime–avibactam       | — <sup>b</sup>                        | —                 | 0.5 – 64        | 77.8                       |
|                                                   | Ceftazidime                 | —                                     | —                 | 64 – >128       | 0                          |

| Phenotype/Organism (no. of isolates) <sup>a</sup> | Antimicrobial agent                   | MIC ( $\mu\text{g/ml}$ ) <sup>b</sup> |                   |                 | % Susceptible <sup>c</sup> |      |
|---------------------------------------------------|---------------------------------------|---------------------------------------|-------------------|-----------------|----------------------------|------|
|                                                   |                                       | MIC <sub>50</sub>                     | MIC <sub>90</sub> | Range           |                            |      |
|                                                   | Cefepime                              | —                                     | —                 | 0.5 – >16       | 11.1                       |      |
|                                                   | Aztreonam                             | —                                     | —                 | 16 – >128       | 0                          |      |
|                                                   | Piperacillin–tazobactam               | —                                     | —                 | 128 – >128      | 0                          |      |
|                                                   | Doripenem                             | —                                     | —                 | 0.03 – 2        | 77.8                       |      |
|                                                   | Imipenem                              | —                                     | —                 | 0.5 – >8        | 77.8                       |      |
|                                                   | Meropenem                             | —                                     | —                 | 0.03 – 8        | 88.9                       |      |
|                                                   | Amikacin                              | —                                     | —                 | 2 – >32         | 33.3                       |      |
|                                                   | Colistin (n=0) <sup>d</sup>           | —                                     | —                 | ND <sup>g</sup> | ND                         |      |
|                                                   | Tigecycline                           | —                                     | —                 | 0.5 – 2         | 100                        |      |
|                                                   | Levofloxacin                          | —                                     | —                 | 2 – >4          | 11.1                       |      |
|                                                   | Multidrug-resistant, MBL-negative (7) | Ceftazidime–avibactam                 | — <sup>b</sup>    | —               | 0.5 – 4                    | 100  |
|                                                   |                                       | Ceftazidime                           | —                 | —               | 64 – >128                  | 0    |
|                                                   |                                       | Cefepime                              | —                 | —               | 0.5 – >16                  | 14.3 |
| Aztreonam                                         |                                       | —                                     | —                 | 16 – >128       | 0                          |      |
| Piperacillin–tazobactam                           |                                       | —                                     | —                 | 128 – >128      | 0                          |      |
| Doripenem                                         |                                       | —                                     | —                 | 0.03 – 2        | 85.7                       |      |
| Imipenem                                          |                                       | —                                     | —                 | 0.5 – >8        | 85.7                       |      |
| Meropenem                                         |                                       | —                                     | —                 | 0.03 – 8        | 85.7                       |      |
| Amikacin                                          |                                       | —                                     | —                 | 16 – >32        | 14.3                       |      |
| Colistin (n=0) <sup>d</sup>                       |                                       | —                                     | —                 | ND <sup>g</sup> | ND                         |      |
| Tigecycline                                       |                                       | —                                     | —                 | 0.5 – 2         | 100                        |      |
| Levofloxacin                                      |                                       | —                                     | —                 | 2 – >4          | 14.3                       |      |
| Proteace <sup>f</sup>                             |                                       |                                       |                   |                 |                            |      |
| All (166) <sup>k</sup>                            | Ceftazidime–avibactam                 | 0.03                                  | 0.12              | ≤0.015 – 1      | 100                        |      |
|                                                   | Ceftazidime                           | 0.06                                  | 0.5               | ≤0.015 – >128   | 94.6                       |      |
|                                                   | Cefepime                              | ≤0.12                                 | 0.25              | ≤0.12 – >16     | 97.6                       |      |
|                                                   | Aztreonam                             | ≤0.015                                | 0.06              | ≤0.015 – 4      | 100                        |      |
|                                                   | Piperacillin–tazobactam               | 0.5                                   | 1                 | ≤0.25 – 32      | 99.4                       |      |
|                                                   | Doripenem                             | 0.25                                  | 0.5               | 0.06 – 2        | 99.4                       |      |
|                                                   | Imipenem                              | 2                                     | 4                 | 0.25 – 8        | 28.9                       |      |
|                                                   | Meropenem                             | 0.06                                  | 0.12              | 0.03 – 1        | 100                        |      |
|                                                   | Amikacin                              | 4                                     | 8                 | ≤0.25 – >32     | 98.2                       |      |
|                                                   | Colistin (n=87) <sup>d</sup>          | >4                                    | >4                | >4 – >4         | 0                          |      |
|                                                   | Tigecycline                           | 2                                     | 4                 | 0.03 – 8        | 68.1                       |      |
|                                                   | Levofloxacin                          | 0.12                                  | 4                 | ≤0.03 – >4      | 86.1                       |      |
| Ceftazidime-nonsusceptible (9)                    | Ceftazidime–avibactam                 | — <sup>b</sup>                        | —                 | 0.06 – 1        | 100                        |      |
|                                                   | Ceftazidime                           | —                                     | —                 | 8 – >128        | 0                          |      |
|                                                   | Cefepime                              | —                                     | —                 | ≤0.12 – 2       | 100                        |      |
|                                                   | Aztreonam                             | —                                     | —                 | 0.12 – 4        | 100                        |      |
|                                                   | Piperacillin–tazobactam               | —                                     | —                 | 1 – 32          | 88.9                       |      |
|                                                   | Doripenem                             | —                                     | —                 | 0.12 – 1        | 100                        |      |
|                                                   | Imipenem                              | —                                     | —                 | 2 – 8           | 0                          |      |
|                                                   | Meropenem                             | —                                     | —                 | 0.12 – 0.25     | 100                        |      |
|                                                   | Amikacin                              | —                                     | —                 | 1 – >32         | 88.9                       |      |
|                                                   | Colistin (n=7) <sup>d</sup>           | —                                     | —                 | >4 – >4         | 0                          |      |
|                                                   | Tigecycline                           | —                                     | —                 | 0.5 – 4         | 88.9                       |      |
|                                                   | Levofloxacin                          | —                                     | —                 | 0.12 – >4       | 44.4                       |      |
|                                                   | Multidrug-resistant (3)               | Ceftazidime–avibactam                 | — <sup>b</sup>    | —               | 0.12 – 0.5                 | 100  |
| Ceftazidime                                       |                                       | —                                     | —                 | 0.5 – 64        | 66.7                       |      |
| Cefepime                                          |                                       | —                                     | —                 | 0.25 – >16      | 66.7                       |      |
| Aztreonam                                         |                                       | —                                     | —                 | 0.06 – 4        | 100                        |      |
| Piperacillin–tazobactam                           |                                       | —                                     | —                 | 0.5 – 32        | 66.7                       |      |
| Doripenem                                         |                                       | —                                     | —                 | 0.12 – 0.25     | 100                        |      |
| Imipenem                                          |                                       | —                                     | —                 | 1 – 2           | 33.3                       |      |
| Meropenem                                         |                                       | —                                     | —                 | 0.06 – 0.12     | 100                        |      |
| Amikacin                                          |                                       | —                                     | —                 | >32 – >32       | 0                          |      |
| Colistin (n=2) <sup>d</sup>                       |                                       | —                                     | —                 | >4 – >4         | 0                          |      |
| Tigecycline                                       |                                       | —                                     | —                 | 2 – 2           | 100                        |      |
| Levofloxacin                                      |                                       | —                                     | —                 | >4 – >4         | 0                          |      |

| Phenotype/Organism (no. of isolates) <sup>a</sup> | Antimicrobial agent                          | MIC (µg/ml) <sup>b</sup> |                   |                 | % Susceptible <sup>c</sup> |      |
|---------------------------------------------------|----------------------------------------------|--------------------------|-------------------|-----------------|----------------------------|------|
|                                                   |                                              | MIC <sub>50</sub>        | MIC <sub>90</sub> | Range           |                            |      |
| <i>Other Enterobacteriaceae</i>                   |                                              |                          |                   |                 |                            |      |
| All (29) <sup>1</sup>                             | Ceftazidime–avibactam                        | 0.12                     | 1                 | ≤0.015 – >128   | 96.6                       |      |
|                                                   | Ceftazidime                                  | 0.25                     | 8                 | ≤0.015 – >128   | 89.7                       |      |
|                                                   | Cefepime                                     | ≤0.12                    | 16                | ≤0.12 – >16     | 82.8                       |      |
|                                                   | Aztreonam                                    | 0.12                     | 16                | 0.03 – >128     | 86.2                       |      |
|                                                   | Piperacillin–tazobactam                      | 2                        | 16                | ≤0.25 – 64      | 93.1                       |      |
|                                                   | Doripenem                                    | 0.12                     | 0.25              | 0.03 – >4       | 96.6                       |      |
|                                                   | Imipenem                                     | 0.5                      | 1                 | 0.25 – >8       | 96.6                       |      |
|                                                   | Meropenem                                    | 0.06                     | 0.06              | 0.03 – 8        | 96.6                       |      |
|                                                   | Amikacin                                     | 2                        | 4                 | ≤0.25 – 16      | 100                        |      |
|                                                   | Colistin (n=12) <sup>d</sup>                 | >4                       | >4                | 0.5 – >4        | 16.7                       |      |
|                                                   | Tigecycline                                  | 1                        | 8                 | 0.5 – >8        | 86.2                       |      |
|                                                   | Levofloxacin                                 | 0.25                     | >4                | ≤0.03 – >4      | 79.3                       |      |
|                                                   | All, MBL–negative (28)                       | Ceftazidime–avibactam    | 0.12              | 1               | ≤0.015 – 1                 | 100  |
|                                                   |                                              | Ceftazidime              | 0.25              | 4               | ≤0.015 – 128               | 92.9 |
| Cefepime                                          |                                              | ≤0.12                    | 8                 | ≤0.12 – >16     | 85.7                       |      |
| Aztreonam                                         |                                              | 0.12                     | 16                | 0.03 – >128     | 85.7                       |      |
| Piperacillin–tazobactam                           |                                              | 2                        | 16                | ≤0.25 – 64      | 92.9                       |      |
| Doripenem                                         |                                              | 0.12                     | 0.25              | 0.03 – 0.25     | 100                        |      |
| Imipenem                                          |                                              | 0.5                      | 1                 | 0.25 – 1        | 100                        |      |
| Meropenem                                         |                                              | 0.06                     | 0.06              | 0.03 – 0.06     | 100                        |      |
| Amikacin                                          |                                              | 2                        | 4                 | ≤0.25 – 16      | 100                        |      |
| Colistin (n=12) <sup>d</sup>                      |                                              | >4                       | >4                | 0.5 – >4        | 16.7                       |      |
| Tigecycline                                       |                                              | 1                        | 8                 | 0.5 – >8        | 85.7                       |      |
| Levofloxacin                                      |                                              | 0.25                     | >4                | ≤0.03 – >4      | 82.1                       |      |
| Ceftazidime-nonsusceptible (3)                    |                                              | Ceftazidime–avibactam    | — <sup>b</sup>    | —               | 0.12 – >128                | 66.7 |
|                                                   |                                              | Ceftazidime              | —                 | —               | 8 – >128                   | 0    |
|                                                   | Cefepime                                     | —                        | —                 | 8 – >16         | 0                          |      |
|                                                   | Aztreonam                                    | —                        | —                 | 0.25 – >128     | 33.3                       |      |
|                                                   | Piperacillin–tazobactam                      | —                        | —                 | 4 – 64          | 66.7                       |      |
|                                                   | Doripenem                                    | —                        | —                 | 0.06 – >4       | 66.7                       |      |
|                                                   | Imipenem                                     | —                        | —                 | 0.25 – >8       | 66.7                       |      |
|                                                   | Meropenem                                    | —                        | —                 | 0.06 – 8        | 66.7                       |      |
|                                                   | Amikacin                                     | —                        | —                 | 1 – 16          | 100                        |      |
|                                                   | Colistin (n=2) <sup>d</sup>                  | —                        | —                 | >4 – >4         | 0                          |      |
|                                                   | Tigecycline                                  | —                        | —                 | 0.5 – 8         | 66.7                       |      |
|                                                   | Levofloxacin                                 | —                        | —                 | 1 – >4          | 33.3                       |      |
|                                                   | Ceftazidime-nonsusceptible, MBL–negative (2) | Ceftazidime–avibactam    | — <sup>b</sup>    | —               | 0.12 – 1                   | 100  |
|                                                   |                                              | Ceftazidime              | —                 | —               | 8 – 128                    | 0    |
| Cefepime                                          |                                              | —                        | —                 | 8 – 16          | 0                          |      |
| Aztreonam                                         |                                              | —                        | —                 | >128 – >128     | 0                          |      |
| Piperacillin–tazobactam                           |                                              | —                        | —                 | 8 – 64          | 50.0                       |      |
| Doripenem                                         |                                              | —                        | —                 | 0.06 – 0.25     | 100                        |      |
| Imipenem                                          |                                              | —                        | —                 | 0.25 – 0.5      | 100                        |      |
| Meropenem                                         |                                              | —                        | —                 | 0.06 – 0.06     | 100                        |      |
| Amikacin                                          |                                              | —                        | —                 | 2 – 16          | 100                        |      |
| Colistin (n=2) <sup>d</sup>                       |                                              | —                        | —                 | >4 – >4         | 0                          |      |
| Tigecycline                                       |                                              | —                        | —                 | 1 – 8           | 50.0                       |      |
| Levofloxacin                                      |                                              | —                        | —                 | 1 – >4          | 50.0                       |      |
| Meropenem-nonsusceptible (1) <sup>i</sup>         |                                              | Ceftazidime–avibactam    | — <sup>b</sup>    | —               | >128                       | 0    |
|                                                   |                                              | Ceftazidime              | —                 | —               | >128                       | 0    |
|                                                   | Cefepime                                     | —                        | —                 | >16             | 0                          |      |
|                                                   | Aztreonam                                    | —                        | —                 | 0.25            | 100                        |      |
|                                                   | Piperacillin–tazobactam                      | —                        | —                 | 4               | 100                        |      |
|                                                   | Doripenem                                    | —                        | —                 | >4              | 0                          |      |
|                                                   | Imipenem                                     | —                        | —                 | >8              | 0                          |      |
|                                                   | Meropenem                                    | —                        | —                 | 8               | 0                          |      |
|                                                   | Amikacin                                     | —                        | —                 | 1               | 100                        |      |
|                                                   | Colistin (n=0) <sup>d</sup>                  | —                        | —                 | ND <sup>g</sup> | ND                         |      |
|                                                   | Tigecycline                                  | —                        | —                 | 0.5             | 100                        |      |

| Phenotype/Organism (no. of isolates) <sup>a</sup> | Antimicrobial agent           | MIC (µg/ml) <sup>b</sup> |                   |              | % Susceptible <sup>c</sup> |      |
|---------------------------------------------------|-------------------------------|--------------------------|-------------------|--------------|----------------------------|------|
|                                                   |                               | MIC <sub>50</sub>        | MIC <sub>90</sub> | Range        |                            |      |
|                                                   | Levofloxacin                  | —                        | —                 | >4           | 0                          |      |
| Multidrug-resistant (3)                           | Ceftazidime–avibactam         | — <sup>b</sup>           | —                 | 1 – >128     | 66.7                       |      |
|                                                   | Ceftazidime                   | —                        | —                 | 4 – >128     | 33.3                       |      |
|                                                   | Cefepime                      | —                        | —                 | 16 – >16     | 0                          |      |
|                                                   | Aztreonam                     | —                        | —                 | 0.25 – >128  | 33.3                       |      |
|                                                   | Piperacillin–tazobactam       | —                        | —                 | 4 – 64       | 66.7                       |      |
|                                                   | Doripenem                     | —                        | —                 | 0.06 – >4    | 66.7                       |      |
|                                                   | Imipenem                      | —                        | —                 | 0.25 – >8    | 66.7                       |      |
|                                                   | Meropenem                     | —                        | —                 | 0.06 – 8     | 66.7                       |      |
|                                                   | Amikacin                      | —                        | —                 | 1 – 16       | 100                        |      |
|                                                   | Colistin (n=2) <sup>d</sup>   | —                        | —                 | >4 – >4      | 0                          |      |
|                                                   | Tigecycline                   | —                        | —                 | 0.5 – 8      | 33.3                       |      |
| Levofloxacin                                      | —                             | —                        | >4 – >4           | 0            |                            |      |
| Multidrug-resistant, MBL-negative (2)             | Ceftazidime–avibactam         | — <sup>b</sup>           | —                 | 1 – 1        | 100                        |      |
|                                                   | Ceftazidime                   | —                        | —                 | 4 – 8        | 50.0                       |      |
|                                                   | Cefepime                      | —                        | —                 | 16 – >16     | 0                          |      |
|                                                   | Aztreonam                     | —                        | —                 | 16 – >128    | 0                          |      |
|                                                   | Piperacillin–tazobactam       | —                        | —                 | 4 – 64       | 50.0                       |      |
|                                                   | Doripenem                     | —                        | —                 | 0.06 – 0.06  | 100                        |      |
|                                                   | Imipenem                      | —                        | —                 | 0.25 – 0.5   | 100                        |      |
|                                                   | Meropenem                     | —                        | —                 | 0.06 – 0.06  | 100                        |      |
|                                                   | Amikacin                      | —                        | —                 | 2 – 16       | 100                        |      |
|                                                   | Colistin (n=2) <sup>d</sup>   | —                        | —                 | >4 – >4      | 0                          |      |
|                                                   | Tigecycline                   | —                        | —                 | 8 – 8        | 0                          |      |
|                                                   | Levofloxacin                  | —                        | —                 | >4 – >4      | 0                          |      |
|                                                   | <i>Pseudomonas aeruginosa</i> |                          |                   |              |                            |      |
| All (288)                                         | Ceftazidime–avibactam         | 2                        | 8                 | 0.5 – >128   | 95.5                       |      |
|                                                   | Ceftazidime                   | 2                        | 64                | 0.5 – >128   | 80.2                       |      |
|                                                   | Cefepime                      | 2                        | 16                | ≤0.12 – >16  | 83.7                       |      |
|                                                   | Aztreonam                     | 8                        | 64                | 0.25 – >128  | 67.0                       |      |
|                                                   | Piperacillin–tazobactam       | 8                        | >128              | ≤0.25 – >128 | 72.6                       |      |
|                                                   | Doripenem                     | 0.5                      | 4                 | 0.06 – >4    | 86.1                       |      |
|                                                   | Imipenem                      | 2                        | >8                | 0.25 – >8    | 78.8                       |      |
|                                                   | Meropenem                     | 0.5                      | 8                 | 0.03 – >8    | 83.3                       |      |
|                                                   | Amikacin                      | 4                        | 8                 | 0.5 – >32    | 98.6                       |      |
|                                                   | Colistin (n=204) <sup>d</sup> | 2                        | 2                 | 0.25 – 4     | 92.7                       |      |
|                                                   | Levofloxacin                  | 0.5                      | >4                | 0.12 – >4    | 77.4                       |      |
|                                                   | All, MBL-negative (287)       | Ceftazidime–avibactam    | 2                 | 8            | 0.5 – >128                 | 95.5 |
|                                                   |                               | Ceftazidime              | 2                 | 64           | 0.5 – >128                 | 80.1 |
| Cefepime                                          |                               | 2                        | 16                | ≤0.12 – >16  | 83.6                       |      |
| Aztreonam                                         |                               | 8                        | 64                | 0.25 – >128  | 66.9                       |      |
| Piperacillin–tazobactam                           |                               | 8                        | >128              | ≤0.25 – >128 | 72.5                       |      |
| Doripenem                                         |                               | 0.5                      | 4                 | 0.06 – >4    | 86.4                       |      |
| Imipenem                                          |                               | 2                        | >8                | 0.25 – >8    | 79.1                       |      |
| Meropenem                                         |                               | 0.5                      | 8                 | 0.03 – >8    | 83.6                       |      |
| Amikacin                                          |                               | 4                        | 8                 | 0.5 – >32    | 99.0                       |      |
| Colistin (n=204) <sup>d</sup>                     |                               | 2                        | 2                 | 0.25 – 4     | 92.7                       |      |
| Levofloxacin                                      |                               | 0.5                      | >4                | 0.12 – >4    | 77.7                       |      |
| Ceftazidime-nonsusceptible (57) <sup>f</sup>      |                               | Ceftazidime–avibactam    | 8                 | 32           | 1 – >128                   | 77.2 |
|                                                   |                               | Ceftazidime              | 64                | 128          | 16 – >128                  | 0    |
|                                                   | Cefepime                      | 16                       | >16               | 2 – >16      | 21.1                       |      |
|                                                   | Aztreonam                     | 32                       | 128               | 8 – >128     | 5.3                        |      |
|                                                   | Piperacillin–tazobactam       | >128                     | >128              | 8 – >128     | 7.0                        |      |
|                                                   | Doripenem                     | 2                        | >4                | 0.12 – >4    | 56.1                       |      |
|                                                   | Imipenem                      | 4                        | >8                | 1 – >8       | 49.1                       |      |
|                                                   | Meropenem                     | 2                        | >8                | 0.12 – >8    | 52.6                       |      |
|                                                   | Amikacin                      | 4                        | 16                | 1 – 32       | 98.3                       |      |
|                                                   | Colistin (n=37) <sup>d</sup>  | 2                        | 4                 | 0.25 – 4     | 86.5                       |      |
|                                                   | Levofloxacin                  | 2                        | >4                | 0.25 – >4    | 52.6                       |      |

| Phenotype/Organism (no. of isolates) <sup>a</sup> | Antimicrobial agent          | MIC (µg/ml) <sup>b</sup> |                   |            | % Susceptible <sup>c</sup> |
|---------------------------------------------------|------------------------------|--------------------------|-------------------|------------|----------------------------|
|                                                   |                              | MIC <sub>50</sub>        | MIC <sub>90</sub> | Range      |                            |
| Meropenem-nonsusceptible (48)                     | Ceftazidime–avibactam        | 8                        | 32                | 1 – >128   | 77.1                       |
|                                                   | Ceftazidime                  | 16                       | 128               | 0.5 – >128 | 43.8                       |
|                                                   | Cefepime                     | 16                       | >16               | 1 – >16    | 47.9                       |
|                                                   | Aztreonam                    | 32                       | 128               | 2 – >128   | 25.0                       |
|                                                   | Piperacillin–tazobactam      | 64                       | >128              | 4 – >128   | 29.2                       |
|                                                   | Doripenem                    | 4                        | >4                | 1 – >4     | 18.8                       |
|                                                   | Imipenem                     | >8                       | >8                | 1 – >8     | 14.6                       |
|                                                   | Meropenem                    | 8                        | >8                | 4 – >8     | 0                          |
|                                                   | Amikacin                     | 4                        | 16                | 0.5 – 32   | 93.8                       |
|                                                   | Colistin (n=30) <sup>d</sup> | 2                        | 2                 | 0.25 – 4   | 96.7                       |
|                                                   | Levofloxacin                 | >4                       | >4                | 0.25 – >4  | 35.4                       |
| Meropenem-nonsusceptible, MBL–negative (47)       | Ceftazidime–avibactam        | 8                        | 32                | 1 – >128   | 76.6                       |
|                                                   | Ceftazidime                  | 16                       | 128               | 0.5 – >128 | 42.6                       |
|                                                   | Cefepime                     | 16                       | >16               | 1 – >16    | 46.8                       |
|                                                   | Aztreonam                    | 32                       | 128               | 2 – >128   | 23.4                       |
|                                                   | Piperacillin–tazobactam      | 128                      | >128              | 4 – >128   | 27.7                       |
|                                                   | Doripenem                    | >4                       | >4                | 1 – >4     | 19.2                       |
|                                                   | Imipenem                     | >8                       | >8                | 1 – >8     | 14.9                       |
|                                                   | Meropenem                    | 8                        | >8                | 4 – >8     | 0                          |
|                                                   | Amikacin                     | 4                        | 16                | 0.5 – 32   | 95.7                       |
|                                                   | Colistin (n=30) <sup>d</sup> | 2                        | 2                 | 0.25 – 4   | 96.7                       |
|                                                   | Levofloxacin                 | >4                       | >4                | 0.25 – >4  | 36.2                       |
| Multidrug–resistant (35) <sup>f</sup>             | Ceftazidime–avibactam        | 8                        | 32                | 2 – >128   | 65.7                       |
|                                                   | Ceftazidime                  | 64                       | 128               | 4 – >128   | 11.4                       |
|                                                   | Cefepime                     | >16                      | >16               | 4 – >16    | 14.3                       |
|                                                   | Aztreonam                    | 64                       | 128               | 8 – >128   | 2.9                        |
|                                                   | Piperacillin–tazobactam      | >128                     | >128              | 16 – >128  | 5.7                        |
|                                                   | Doripenem                    | >4                       | >4                | 0.25 – >4  | 25.7                       |
|                                                   | Imipenem                     | >8                       | >8                | 1 – >8     | 17.1                       |
|                                                   | Meropenem                    | 8                        | >8                | 0.12 – >8  | 20.0                       |
|                                                   | Amikacin                     | 8                        | 16                | 2 – >32    | 91.4                       |
|                                                   | Colistin (n=18) <sup>d</sup> | 2                        | 2                 | 0.25 – 4   | 94.4                       |
|                                                   | Levofloxacin                 | >4                       | >4                | 0.25 – >4  | 28.6                       |

<sup>a</sup> MBL–negative, no gene encoding a metallo–β–lactamase was detected by PCR.

<sup>b</sup> —, MIC<sub>50</sub> and MIC<sub>90</sub> were not calculated for n < 10 isolates.

<sup>c</sup> % Susceptibility was determined according to CLSI 2016 breakpoints with the exception of ceftazidime–avibactam and tigecycline, where US FDA breakpoints were applied. Because CLSI colistin breakpoints are not available for the *Enterobacteriaceae*, susceptibility for this organism group was determined using the EUCAST 2016 breakpoints for colistin.

<sup>d</sup> Values are for colistin tested without 0.002% polysorbate–80; isolates collected in 2014–2015 only.

<sup>e</sup> Excludes isolates of *Proteaeae* and *Serratia* spp. that are intrinsically resistant to colistin.

<sup>f</sup> All isolates were MBL–negative.

<sup>g</sup> ND, not determined; MIC range and % susceptible were not calculated for n=0 isolates.

<sup>h</sup> *Enterobacter* spp. includes *Enterobacter aerogenes* (n=72), *Enterobacter asburiae* (n=15), *Enterobacter cloacae* (n=52), and *Enterobacter kobei* (n=7).

<sup>i</sup> All isolates were MBL–positive.

<sup>j</sup> *Citrobacter* spp. includes *Citrobacter amalonaticus* (n=1), *Citrobacter braakii* (n=2), *Citrobacter freundii* (n=27), and *Citrobacter koseri* (n=52).

<sup>k</sup>Proteeae includes *Morganella morganii* (n=39), *Proteus mirabilis* (n=71), *Proteus vulgaris* (n=45), *Providencia rettgeri* (n=6), and *Providencia stuartii* (n=5).

<sup>l</sup>Other *Enterobacteriaceae* includes *Raoultella ornithinolytica* (n=5) and *Serratia marcescens* (n=24).

**Supplemental Table S9B.** Taiwan – *In vitro* activities of ceftazidime–avibactam and comparator antimicrobial agents tested against 351 isolates of  $\beta$ –lactamase–positive *Enterobacteriaceae* (n=286) and *P. aeruginosa* (n=65) collected as part of the INFORM global surveillance program in 2012–2015

| Organism/Genotype (no. of isolates) <sup>a</sup>     | Antimicrobial agent                             | MIC ( $\mu\text{g/ml}$ ) <sup>b</sup> |                   |                   | % Susceptible <sup>c</sup> |
|------------------------------------------------------|-------------------------------------------------|---------------------------------------|-------------------|-------------------|----------------------------|
|                                                      |                                                 | MIC <sub>50</sub>                     | MIC <sub>90</sub> | Range             |                            |
| <i>Enterobacteriaceae</i> (286)<br>OSBL–positive (7) | Ceftazidime–avibactam                           | — <sup>b</sup>                        | —                 | 0.06 – 0.5        | 100                        |
|                                                      | Ceftazidime                                     | —                                     | —                 | 2 – 64            | 42.9                       |
|                                                      | Cefepime                                        | —                                     | —                 | $\leq 0.12$ – 1   | 100                        |
|                                                      | Aztreonam                                       | —                                     | —                 | 0.5 – 16          | 85.7                       |
|                                                      | Piperacillin–tazobactam                         | —                                     | —                 | 2 – >128          | 42.9                       |
|                                                      | Doripenem                                       | —                                     | —                 | 0.03 – 0.12       | 100                        |
|                                                      | Imipenem                                        | —                                     | —                 | 0.12 – 1          | 100                        |
|                                                      | Meropenem                                       | —                                     | —                 | 0.03 – 0.06       | 100                        |
|                                                      | Amikacin                                        | —                                     | —                 | 0.5 – 2           | 100                        |
|                                                      | Colistin (n=3) <sup>d</sup>                     | —                                     | —                 | 0.25 – 1          | 100                        |
|                                                      | Tigecycline                                     | —                                     | —                 | 0.25 – 2          | 100                        |
|                                                      | Levofloxacin                                    | —                                     | —                 | 0.06 – >4         | 57.1                       |
|                                                      | ESBL–positive (128) <sup>e</sup>                | Ceftazidime–avibactam                 | 0.25              | 1                 | $\leq 0.015$ – 16          |
| Ceftazidime                                          |                                                 | 32                                    | >128              | 0.5 – >128        | 18.8                       |
| Cefepime                                             |                                                 | >16                                   | >16               | $\leq 0.12$ – >16 | 11.7                       |
| Aztreonam                                            |                                                 | 64                                    | >128              | 0.25 – >128       | 9.4                        |
| Piperacillin–tazobactam                              |                                                 | 8                                     | >128              | 1 – >128          | 62.5                       |
| Doripenem                                            |                                                 | 0.06                                  | 0.12              | 0.015 – 1         | 100                        |
| Imipenem                                             |                                                 | 0.25                                  | 0.5               | 0.06 – >8         | 99.2                       |
| Meropenem                                            |                                                 | 0.03                                  | 0.06              | 0.015 – 2         | 97.7                       |
| Amikacin                                             |                                                 | 2                                     | 8                 | 0.5 – >32         | 96.9                       |
| Colistin (n=64) <sup>d</sup>                         |                                                 | 0.5                                   | 1                 | 0.25 – 1          | 100                        |
| Tigecycline                                          |                                                 | 0.5                                   | 2                 | 0.06 – 8          | 98.4                       |
| Levofloxacin                                         |                                                 | >4                                    | >4                | $\leq 0.03$ – >4  | 38.3                       |
| AmpC–positive (90) <sup>f</sup>                      |                                                 | Ceftazidime–avibactam                 | 0.25              | 1                 | $\leq 0.015$ – 16          |
|                                                      | Ceftazidime                                     | 32                                    | >128              | 0.12 – >128       | 18.9                       |
|                                                      | Cefepime                                        | 0.25                                  | 2                 | $\leq 0.12$ – >16 | 90.0                       |
|                                                      | Aztreonam                                       | 8                                     | 64                | 0.03 – >128       | 33.3                       |
|                                                      | Piperacillin–tazobactam                         | 8                                     | >128              | 0.5 – >128        | 66.7                       |
|                                                      | Doripenem                                       | 0.06                                  | 0.5               | 0.03 – >4         | 97.8                       |
|                                                      | Imipenem                                        | 0.5                                   | 2                 | 0.12 – >8         | 70.0                       |
|                                                      | Meropenem                                       | 0.06                                  | 0.25              | $\leq 0.004$ – 8  | 97.8                       |
|                                                      | Amikacin                                        | 2                                     | 4                 | 0.5 – >32         | 98.9                       |
|                                                      | Colistin (n=50) <sup>d</sup>                    | 0.5                                   | 2                 | 0.25 – >4         | 96.0                       |
|                                                      | Tigecycline                                     | 0.5                                   | 1                 | 0.06 – 4          | 97.8                       |
|                                                      | Levofloxacin                                    | 0.5                                   | >4                | $\leq 0.03$ – >4  | 61.1                       |
|                                                      | ESBL–positive + AmpC–positive (53) <sup>g</sup> | Ceftazidime–avibactam                 | 0.5               | 4                 | 0.03 – 8                   |
| Ceftazidime                                          |                                                 | 128                                   | >128              | 16 – >128         | 0                          |
| Cefepime                                             |                                                 | >16                                   | >16               | 0.5 – >16         | 9.4                        |
| Aztreonam                                            |                                                 | 64                                    | >128              | 8 – >128          | 0.0                        |
| Piperacillin–tazobactam                              |                                                 | >128                                  | >128              | 2 – >128          | 28.3                       |
| Doripenem                                            |                                                 | 0.12                                  | 0.5               | 0.03 – >4         | 94.3                       |
| Imipenem                                             |                                                 | 1                                     | 2                 | 0.25 – >8         | 79.2                       |
| Meropenem                                            |                                                 | 0.06                                  | 0.5               | 0.03 – 8          | 94.3                       |
| Amikacin                                             |                                                 | 4                                     | >32               | 0.5 – >32         | 73.6                       |
| Colistin (n=25) <sup>d</sup>                         |                                                 | 1                                     | 1                 | 0.25 – 4          | 96.0                       |
| Tigecycline                                          |                                                 | 1                                     | 2                 | 0.12 – 4          | 98.1                       |
| Levofloxacin                                         |                                                 | >4                                    | >4                | 0.5 – >4          | 13.2                       |
| KPC–positive (1) <sup>h</sup>                        |                                                 | Ceftazidime–avibactam                 | — <sup>b</sup>    | —                 | 2                          |
|                                                      | Ceftazidime                                     | —                                     | —                 | 64                | 0                          |



| Organism/Genotype (no. of isolates) <sup>a</sup>   | Antimicrobial agent          | MIC (µg/ml) <sup>b</sup> |                   |                 | % Susceptible <sup>c</sup> |
|----------------------------------------------------|------------------------------|--------------------------|-------------------|-----------------|----------------------------|
|                                                    |                              | MIC <sub>50</sub>        | MIC <sub>90</sub> | Range           |                            |
|                                                    | Cefepime                     | —                        | —                 | >16             | 0                          |
|                                                    | Aztreonam                    | —                        | —                 | >128            | 0                          |
|                                                    | Piperacillin–tazobactam      | —                        | —                 | >128            | 0                          |
|                                                    | Doripenem                    | —                        | —                 | >4              | 0                          |
|                                                    | Imipenem                     | —                        | —                 | >8              | 0                          |
|                                                    | Meropenem                    | —                        | —                 | >8              | 0                          |
|                                                    | Amikacin                     | —                        | —                 | 2               | 100                        |
|                                                    | Colistin (n=1) <sup>d</sup>  | —                        | —                 | 1               | 100                        |
|                                                    | Tigecycline                  | —                        | —                 | 4               | 0                          |
|                                                    | Levofloxacin                 | —                        | —                 | >4              | 0                          |
| MBL–positive (7) <sup>i</sup>                      | Ceftazidime–avibactam        | — <sup>b</sup>           | —                 | 64 – >128       | 0                          |
|                                                    | Ceftazidime                  | —                        | —                 | 128 – >128      | 0                          |
|                                                    | Cefepime                     | —                        | —                 | 8 – >16         | 0                          |
|                                                    | Aztreonam                    | —                        | —                 | 0.06 – >128     | 28.6                       |
|                                                    | Piperacillin–tazobactam      | —                        | —                 | 4 – 128         | 71.4                       |
|                                                    | Doripenem                    | —                        | —                 | 1 – >4          | 28.6                       |
|                                                    | Imipenem                     | —                        | —                 | 1 – >8          | 28.6                       |
|                                                    | Meropenem                    | —                        | —                 | 0.5 – 8         | 57.1                       |
|                                                    | Amikacin                     | —                        | —                 | 1 – 4           | 100                        |
|                                                    | Colistin (n=0) <sup>d</sup>  | —                        | —                 | ND <sup>j</sup> | ND                         |
|                                                    | Tigecycline                  | —                        | —                 | 0.5 – 2         | 100                        |
|                                                    | Levofloxacin                 | —                        | —                 | 0.5 – >4        | 42.9                       |
| <i>P. aeruginosa</i> (65)                          | Ceftazidime–avibactam        | — <sup>b</sup>           | —                 | 8               | 100                        |
| MBL–positive (1) <sup>k,l</sup>                    | Ceftazidime                  | —                        | —                 | 8               | 100                        |
|                                                    | Cefepime                     | —                        | —                 | 8               | 100                        |
|                                                    | Aztreonam                    | —                        | —                 | 4               | 100                        |
|                                                    | Piperacillin–tazobactam      | —                        | —                 | 16              | 100                        |
|                                                    | Doripenem                    | —                        | —                 | 4               | 0                          |
|                                                    | Imipenem                     | —                        | —                 | 4               | 0                          |
|                                                    | Meropenem                    | —                        | —                 | 4               | 0                          |
|                                                    | Amikacin                     | —                        | —                 | 32              | 0                          |
|                                                    | Colistin (n=0) <sup>d</sup>  | —                        | —                 | ND <sup>j</sup> | ND                         |
|                                                    | Levofloxacin                 | —                        | —                 | >4              | 0                          |
| No acquired β–lactamase detected (64) <sup>k</sup> | Ceftazidime–avibactam        | 4                        | 16                | 1 – >128        | 81.3                       |
|                                                    | Ceftazidime                  | 8                        | 128               | 0.5 – >128      | 51.6                       |
|                                                    | Cefepime                     | 8                        | >16               | 1 – >16         | 54.7                       |
|                                                    | Aztreonam                    | 16                       | 128               | 2 – >128        | 34.4                       |
|                                                    | Piperacillin–tazobactam      | 32                       | >128              | 2 – >128        | 40.6                       |
|                                                    | Doripenem                    | 4                        | >4                | 0.25 – >4       | 39.1                       |
|                                                    | Imipenem                     | 8                        | >8                | 1 – >8          | 12.5                       |
|                                                    | Meropenem                    | 4                        | >8                | 0.25 – >8       | 26.6                       |
|                                                    | Amikacin                     | 4                        | 16                | 0.5 – 32        | 96.9                       |
|                                                    | Colistin (n=41) <sup>d</sup> | 2                        | 2                 | 0.25 – 4        | 95.1                       |
|                                                    | Levofloxacin                 | 4                        | >4                | 0.25 – >4       | 46.9                       |

<sup>a</sup> OSBL, original–spectrum β–lactamase (e.g. TEM–1, SHV–1, SHV–11); ESBL, extended–spectrum β–lactamase; MBL, metallo–β–lactamase.

<sup>b</sup> —, MIC<sub>50</sub> and MIC<sub>90</sub> were not calculated for n < 10 isolates.

<sup>c</sup> % Susceptibility was determined according to CLSI 2016 breakpoints with the exception of ceftazidime–avibactam and tigecycline, where US FDA breakpoints were applied. Because CLSI colistin breakpoints are not available for the *Enterobacteriaceae*, susceptibility for this organism group was determined using the EUCAST 2016 breakpoints for colistin.

<sup>d</sup> Values are for colistin tested without 0.002% polysorbate–80; isolates collected in 2014–2015 only.

<sup>e</sup> Includes isolates carrying CTX-M-3; CTX-M-14; CTX-M-15; CTX-M-24; CTX-M-27; CTX-M-55; CTX-M-65; CTX-M-79; CTX-M-116; CTX-M-134; SHV-2; SHV-2A; SHV-5; SHV-12; SHV-31; SHV-45; TEM-29; the chromosomal ESBL common to *K. oxytoca*; CTX-M-14 and CTX-M-27; CTX-M-55 and CTX-M-79; SHV-5 and CTX-M-3 or CTX-M-15 or CTX-M-27; CTX-M-14 and SHV-12; CTX-M-27 and SHV-28; with or without SHV-type or TEM-type enzymes with original spectrum activity (OSBLs), undefined spectrum of activity, or those enzymes not inhibited by clavulanic acid.

<sup>f</sup> Includes isolates carrying CMY-2; CMY-4; CMY-81; DHA-1; DHA-1 and CMY-2; DHA-1 and CMY-6; DHA-1 and a CMY-type enzyme; and the chromosomal AmpC common to *Enterobacter* spp. and *M. morgani* with or without SHV-type or TEM-type enzymes with original spectrum activity (OSBLs) or undefined spectrum of activity.

<sup>g</sup> Includes isolates carrying CMY-2 and a CTX-M-type ESBL (CTX-M-15; CTX-M-24; CTX-M-27; CTX-M-55; CTX-M-65; CTX-M-149; CTX-M-161); CMY-2 and TEM-12; CMY-2 and TEM-20; CMY-42 and CTX-M-15; DHA-1 and a CTX-M-type ESBL (CTX-M-14; CTX-M-15; CTX-M-19); DHA-1 and an SHV-type ESBL (SHV-5; SHV-12; SHV-31; SHV-55); and DHA-1 and multiple ESBLs (CTX-M-14 and SHV-12; CTX-M-15 and SHV-2; CTX-M-15 and SHV-12; CTX-M-15 and SHV-28).

<sup>h</sup> Isolate carrying KPC-2 and CTX-M-24.

<sup>i</sup> Includes isolates carrying IMP-8; IMP-8 and SHV-12; IMP-47; and the chromosomal AmpC common to *C. freundii*, *Enterobacter* spp. and *Serratia* spp. with or without SHV-OSBLs and/or TEM-OSBLs.

<sup>j</sup> ND, not determined; MIC range and % susceptible were not calculated for n=0 isolates.

<sup>k</sup> Assumed to carry the chromosomal AmpC common to *P. aeruginosa*.

<sup>l</sup> Isolate carrying VIM-2.

**Supplemental Table S10A.** Thailand – *In vitro* activities of ceftazidime–avibactam and comparator antimicrobial agents tested against 1,266 isolates of *Enterobacteriaceae* and 302 isolates of *P. aeruginosa* collected as part of the INFORM global surveillance program in 2012–2015

| Phenotype/Organism (no. of isolates) <sup>a</sup> | Antimicrobial agent           | MIC (µg/ml) <sup>b</sup> |                   |               | % Susceptible <sup>c</sup> |
|---------------------------------------------------|-------------------------------|--------------------------|-------------------|---------------|----------------------------|
|                                                   |                               | MIC <sub>50</sub>        | MIC <sub>90</sub> | Range         |                            |
| <i>Enterobacteriaceae</i>                         |                               |                          |                   |               |                            |
| All (1,266)                                       | Ceftazidime–avibactam         | 0.12                     | 0.5               | ≤0.015 – >128 | 98.7                       |
|                                                   | Ceftazidime                   | 0.25                     | 128               | ≤0.015 – >128 | 67.7                       |
|                                                   | Cefepime                      | ≤0.12                    | >16               | ≤0.12 – >16   | 68.7                       |
|                                                   | Aztreonam                     | 0.12                     | 128               | ≤0.015 – >128 | 66.7                       |
|                                                   | Piperacillin–tazobactam       | 2                        | 64                | ≤0.25 – >128  | 84.2                       |
|                                                   | Doripenem                     | 0.06                     | 0.25              | ≤0.008 – >4   | 98.6                       |
|                                                   | Imipenem                      | 0.25                     | 2                 | 0.06 – >8     | 85.8                       |
|                                                   | Meropenem                     | 0.03                     | 0.12              | 0.008 – >8    | 98.3                       |
|                                                   | Amikacin                      | 2                        | 8                 | ≤0.25 – >32   | 98.5                       |
|                                                   | Colistin (n=675) <sup>d</sup> | 0.5                      | >4                | ≤0.12 – >4    | 80.7                       |
|                                                   | Tigecycline                   | 0.5                      | 2                 | 0.03 – 8      | 94.6                       |
|                                                   | Levofloxacin                  | 0.5                      | >4                | ≤0.03 – >4    | 66.7                       |
| All, MBL–negative (1,251)                         | Ceftazidime–avibactam         | 0.12                     | 0.5               | ≤0.015 – 64   | 99.8                       |
|                                                   | Ceftazidime                   | 0.25                     | 64                | ≤0.015 – >128 | 68.5                       |
|                                                   | Cefepime                      | ≤0.12                    | >16               | ≤0.12 – >16   | 69.5                       |
|                                                   | Aztreonam                     | 0.12                     | 128               | ≤0.015 – >128 | 67.2                       |
|                                                   | Piperacillin–tazobactam       | 2                        | 64                | ≤0.25 – >128  | 85.1                       |
|                                                   | Doripenem                     | 0.06                     | 0.25              | ≤0.008 – >4   | 99.8                       |
|                                                   | Imipenem                      | 0.25                     | 2                 | 0.06 – >8     | 86.8                       |
|                                                   | Meropenem                     | 0.03                     | 0.12              | 0.008 – >8    | 99.4                       |
|                                                   | Amikacin                      | 2                        | 8                 | ≤0.25 – >32   | 98.7                       |
|                                                   | Colistin (n=664) <sup>d</sup> | 0.5                      | >4                | ≤0.12 – >4    | 80.7                       |
|                                                   | Tigecycline                   | 0.5                      | 2                 | 0.03 – 8      | 94.6                       |
|                                                   | Levofloxacin                  | 0.5                      | >4                | ≤0.03 – >4    | 67.2                       |
| Ceftazidime-nonsusceptible (409)                  | Ceftazidime–avibactam         | 0.25                     | 1                 | ≤0.015 – >128 | 95.8                       |
|                                                   | Ceftazidime                   | 64                       | >128              | 8 – >128      | 0                          |
|                                                   | Cefepime                      | >16                      | >16               | ≤0.12 – >16   | 17.4                       |
|                                                   | Aztreonam                     | 64                       | >128              | 0.06 – >128   | 5.9                        |
|                                                   | Piperacillin–tazobactam       | 16                       | >128              | ≤0.25 – >128  | 58.0                       |
|                                                   | Doripenem                     | 0.06                     | 0.25              | 0.015 – >4    | 95.6                       |
|                                                   | Imipenem                      | 0.25                     | 1                 | 0.06 – >8     | 91.2                       |
|                                                   | Meropenem                     | 0.06                     | 0.12              | 0.015 – >8    | 94.9                       |
|                                                   | Amikacin                      | 4                        | 8                 | 0.5 – >32     | 96.1                       |
|                                                   | Colistin (n=237) <sup>d</sup> | 0.5                      | 1                 | 0.25 – >4     | 92.4                       |
|                                                   | Tigecycline                   | 0.5                      | 2                 | 0.06 – 8      | 97.3                       |
|                                                   | Levofloxacin                  | >4                       | >4                | ≤0.03 – >4    | 39.4                       |
| Ceftazidime-nonsusceptible, MBL–negative (394)    | Ceftazidime–avibactam         | 0.25                     | 1                 | ≤0.015 – 64   | 99.5                       |
|                                                   | Ceftazidime                   | 64                       | >128              | 8 – >128      | 0                          |
|                                                   | Cefepime                      | >16                      | >16               | ≤0.12 – >16   | 18.0                       |
|                                                   | Aztreonam                     | 64                       | >128              | 0.5 – >128    | 5.3                        |
|                                                   | Piperacillin–tazobactam       | 16                       | >128              | ≤0.25 – >128  | 59.9                       |
|                                                   | Doripenem                     | 0.06                     | 0.12              | 0.015 – >4    | 99.2                       |
|                                                   | Imipenem                      | 0.25                     | 1                 | 0.06 – >8     | 94.7                       |
|                                                   | Meropenem                     | 0.06                     | 0.12              | 0.015 – >8    | 98.5                       |
|                                                   | Amikacin                      | 4                        | 8                 | 0.5 – >32     | 96.7                       |
|                                                   | Colistin (n=226) <sup>d</sup> | 0.5                      | 1                 | 0.25 – >4     | 92.9                       |
|                                                   | Tigecycline                   | 0.5                      | 2                 | 0.06 – 8      | 97.2                       |
|                                                   | Levofloxacin                  | >4                       | >4                | ≤0.03 – >4    | 39.9                       |
| Meropenem-nonsusceptible (22)                     | Ceftazidime–avibactam         | >128                     | >128              | 0.12 – >128   | 31.8                       |

| Phenotype/Organism (no. of isolates) <sup>a</sup> | Antimicrobial agent           | MIC (µg/ml) <sup>b</sup> |                   |               | % Susceptible <sup>c</sup> |
|---------------------------------------------------|-------------------------------|--------------------------|-------------------|---------------|----------------------------|
|                                                   |                               | MIC <sub>50</sub>        | MIC <sub>90</sub> | Range         |                            |
|                                                   | Ceftazidime                   | >128                     | >128              | 0.5 – >128    | 4.6                        |
|                                                   | Cefepime                      | >16                      | >16               | ≤0.12 – >16   | 9.1                        |
|                                                   | Aztreonam                     | 128                      | >128              | 0.06 – >128   | 18.2                       |
|                                                   | Piperacillin–tazobactam       | >128                     | >128              | 4 – >128      | 4.6                        |
|                                                   | Doripenem                     | >4                       | >4                | 0.12 – >4     | 18.2                       |
|                                                   | Imipenem                      | >8                       | >8                | 0.25 – >8     | 9.1                        |
|                                                   | Meropenem                     | >8                       | >8                | 2 – >8        | 0                          |
|                                                   | Amikacin                      | 2                        | >32               | 0.5 – >32     | 86.4                       |
|                                                   | Colistin (n=16) <sup>d</sup>  | 0.5                      | >4                | 0.25 – >4     | 75.0                       |
|                                                   | Tigecycline                   | 0.5                      | 2                 | 0.06 – 2      | 100                        |
|                                                   | Levofloxacin                  | >4                       | >4                | 0.06 – >4     | 27.3                       |
| Meropenem-nonsusceptible, MBL–negative (7)        | Ceftazidime–avibactam         | — <sup>b</sup>           | —                 | 0.12 – 4      | 100                        |
|                                                   | Ceftazidime                   | —                        | —                 | 0.5 – >128    | 14.3                       |
|                                                   | Cefepime                      | —                        | —                 | ≤0.12 – >16   | 28.6                       |
|                                                   | Aztreonam                     | —                        | —                 | 0.12 – >128   | 14.3                       |
|                                                   | Piperacillin–tazobactam       | —                        | —                 | 128 – >128    | 0                          |
|                                                   | Doripenem                     | —                        | —                 | 0.12 – >4     | 57.1                       |
|                                                   | Imipenem                      | —                        | —                 | 0.25 – >8     | 28.6                       |
|                                                   | Meropenem                     | —                        | —                 | 2 – >8        | 0                          |
|                                                   | Amikacin                      | —                        | —                 | 0.5 – 8       | 100                        |
|                                                   | Colistin (n=5) <sup>d</sup>   | —                        | —                 | 0.25 – >4     | 60.0                       |
|                                                   | Tigecycline                   | —                        | —                 | 0.06 – 1      | 100                        |
|                                                   | Levofloxacin                  | —                        | —                 | 1 – >4        | 28.6                       |
| Colistin–resistant (24) <sup>e</sup>              | Ceftazidime–avibactam         | 0.25                     | 4                 | 0.12 – >128   | 91.7                       |
|                                                   | Ceftazidime                   | 8                        | >128              | 0.12 – >128   | 45.8                       |
|                                                   | Cefepime                      | 4                        | >16               | ≤0.12 – >16   | 45.8                       |
|                                                   | Aztreonam                     | 8                        | >128              | 0.06 – >128   | 45.8                       |
|                                                   | Piperacillin–tazobactam       | 4                        | >128              | 0.5 – >128    | 62.5                       |
|                                                   | Doripenem                     | 0.06                     | 4                 | 0.03 – >4     | 87.5                       |
|                                                   | Imipenem                      | 0.5                      | 4                 | 0.12 – >8     | 75.0                       |
|                                                   | Meropenem                     | 0.06                     | 8                 | 0.03 – >8     | 83.3                       |
|                                                   | Amikacin                      | 2                        | 8                 | 1 – >32       | 95.8                       |
|                                                   | Colistin (n=24) <sup>d</sup>  | >4                       | >4                | 4 – >4        | 0                          |
|                                                   | Tigecycline                   | 0.5                      | 1                 | 0.12 – 2      | 100                        |
|                                                   | Levofloxacin                  | 0.5                      | >4                | 0.06 – >4     | 66.7                       |
| Colistin–resistant, MBL–negative (22)             | Ceftazidime–avibactam         | 0.25                     | 1                 | 0.12 – 4      | 100                        |
|                                                   | Ceftazidime                   | 2                        | >128              | 0.12 – >128   | 50.0                       |
|                                                   | Cefepime                      | 0.25                     | >16               | ≤0.12 – >16   | 50.0                       |
|                                                   | Aztreonam                     | 8                        | >128              | 0.06 – >128   | 45.5                       |
|                                                   | Piperacillin–tazobactam       | 4                        | >128              | 0.5 – >128    | 68.2                       |
|                                                   | Doripenem                     | 0.06                     | 0.25              | 0.03 – 4      | 95.5                       |
|                                                   | Imipenem                      | 0.5                      | 2                 | 0.12 – 4      | 81.8                       |
|                                                   | Meropenem                     | 0.06                     | 0.5               | 0.03 – 8      | 90.9                       |
|                                                   | Amikacin                      | 2                        | 2                 | 1 – 8         | 100                        |
|                                                   | Colistin (n=22) <sup>d</sup>  | >4                       | >4                | 4 – >4        | 0                          |
|                                                   | Tigecycline                   | 0.5                      | 1                 | 0.12 – 2      | 100                        |
|                                                   | Levofloxacin                  | 0.5                      | >4                | 0.06 – >4     | 68.2                       |
| Multidrug–resistant (245)                         | Ceftazidime–avibactam         | 0.25                     | 2                 | ≤0.015 – >128 | 93.5                       |
|                                                   | Ceftazidime                   | 64                       | >128              | 0.5 – >128    | 3.7                        |
|                                                   | Cefepime                      | >16                      | >16               | ≤0.12 – >16   | 1.2                        |
|                                                   | Aztreonam                     | 64                       | >128              | 0.06 – >128   | 1.6                        |
|                                                   | Piperacillin–tazobactam       | 32                       | >128              | 0.5 – >128    | 47.8                       |
|                                                   | Doripenem                     | 0.06                     | 0.5               | 0.015 – >4    | 93.1                       |
|                                                   | Imipenem                      | 0.25                     | 2                 | 0.12 – >8     | 89.4                       |
|                                                   | Meropenem                     | 0.06                     | 0.5               | 0.015 – >8    | 91.8                       |
|                                                   | Amikacin                      | 4                        | 16                | 0.5 – >32     | 93.9                       |
|                                                   | Colistin (n=132) <sup>d</sup> | 0.5                      | 4                 | 0.25 – >4     | 88.6                       |
|                                                   | Tigecycline                   | 0.5                      | 2                 | 0.06 – 8      | 97.1                       |
|                                                   | Levofloxacin                  | >4                       | >4                | ≤0.03 – >4    | 13.1                       |

| Phenotype/Organism (no. of isolates) <sup>a</sup> | Antimicrobial agent                            | MIC (µg/ml) <sup>b</sup> |                   |               | % Susceptible <sup>c</sup> |
|---------------------------------------------------|------------------------------------------------|--------------------------|-------------------|---------------|----------------------------|
|                                                   |                                                | MIC <sub>50</sub>        | MIC <sub>90</sub> | Range         |                            |
| Multidrug-resistant, MBL-negative (231)           | Ceftazidime-avibactam                          | 0.25                     | 1                 | ≤0.015 – 64   | 99.1                       |
|                                                   | Ceftazidime                                    | 64                       | >128              | 0.5 – >128    | 3.9                        |
|                                                   | Cefepime                                       | >16                      | >16               | ≤0.12 – >16   | 1.3                        |
|                                                   | Aztreonam                                      | 64                       | >128              | 0.12 – >128   | 0.9                        |
|                                                   | Piperacillin-tazobactam                        | 16                       | >128              | 0.5 – >128    | 50.7                       |
|                                                   | Doripenem                                      | 0.06                     | 0.25              | 0.015 – >4    | 98.7                       |
|                                                   | Imipenem                                       | 0.25                     | 1                 | 0.12 – >8     | 94.8                       |
|                                                   | Meropenem                                      | 0.06                     | 0.12              | 0.015 – >8    | 97.4                       |
|                                                   | Amikacin                                       | 4                        | 16                | 0.5 – >32     | 94.8                       |
|                                                   | Colistin (n=121) <sup>d</sup>                  | 0.5                      | 4                 | 0.25 – >4     | 89.3                       |
|                                                   | Tigecycline                                    | 0.5                      | 2                 | 0.06 – 8      | 97.0                       |
|                                                   | Levofloxacin                                   | >4                       | >4                | ≤0.03 – >4    | 12.6                       |
|                                                   | <i>Escherichia coli</i>                        |                          |                   |               |                            |
| All (429)                                         | Ceftazidime-avibactam                          | 0.12                     | 0.25              | ≤0.015 – >128 | 99.5                       |
|                                                   | Ceftazidime                                    | 1                        | 64                | 0.03 – >128   | 58.0                       |
|                                                   | Cefepime                                       | 1                        | >16               | ≤0.12 – >16   | 53.4                       |
|                                                   | Aztreonam                                      | 4                        | 64                | ≤0.015 – >128 | 52.9                       |
|                                                   | Piperacillin-tazobactam                        | 2                        | 32                | 0.5 – >128    | 87.7                       |
|                                                   | Doripenem                                      | 0.06                     | 0.06              | ≤0.008 – >4   | 99.1                       |
|                                                   | Imipenem                                       | 0.25                     | 0.25              | 0.06 – >8     | 98.6                       |
|                                                   | Meropenem                                      | 0.03                     | 0.06              | 0.008 – >8    | 99.1                       |
|                                                   | Amikacin                                       | 2                        | 8                 | 0.5 – >32     | 98.1                       |
|                                                   | Colistin (n=216) <sup>d</sup>                  | 0.5                      | 1                 | ≤0.12 – 4     | 98.6                       |
|                                                   | Tigecycline                                    | 0.25                     | 0.5               | 0.03 – 8      | 99.8                       |
|                                                   | Levofloxacin                                   | >4                       | >4                | ≤0.03 – >4    | 37.3                       |
|                                                   | All, MBL-negative (427)                        | Ceftazidime-avibactam    | 0.12              | 0.25          | ≤0.015 – 4                 |
| Ceftazidime                                       |                                                | 1                        | 64                | 0.03 – >128   | 58.3                       |
| Cefepime                                          |                                                | 1                        | >16               | ≤0.12 – >16   | 53.6                       |
| Aztreonam                                         |                                                | 4                        | 64                | ≤0.015 – >128 | 53.2                       |
| Piperacillin-tazobactam                           |                                                | 2                        | 32                | 0.5 – >128    | 88.1                       |
| Doripenem                                         |                                                | 0.03                     | 0.06              | ≤0.008 – >4   | 99.5                       |
| Imipenem                                          |                                                | 0.12                     | 0.25              | 0.06 – >8     | 99.1                       |
| Meropenem                                         |                                                | 0.03                     | 0.06              | 0.008 – >8    | 99.5                       |
| Amikacin                                          |                                                | 2                        | 8                 | 0.5 – >32     | 98.4                       |
| Colistin (n=215) <sup>d</sup>                     |                                                | 0.5                      | 1                 | ≤0.12 – 4     | 98.6                       |
| Tigecycline                                       |                                                | 0.25                     | 0.5               | 0.03 – 8      | 99.8                       |
| Levofloxacin                                      |                                                | >4                       | >4                | ≤0.03 – >4    | 37.5                       |
| Ceftazidime-nonsusceptible (180)                  |                                                | Ceftazidime-avibactam    | 0.12              | 0.5           | ≤0.015 – >128              |
|                                                   | Ceftazidime                                    | 32                       | >128              | 8 – >128      | 0                          |
|                                                   | Cefepime                                       | >16                      | >16               | ≤0.12 – >16   | 9.4                        |
|                                                   | Aztreonam                                      | 64                       | 128               | 2 – >128      | 2.8                        |
|                                                   | Piperacillin-tazobactam                        | 4                        | 128               | 0.5 – >128    | 80.6                       |
|                                                   | Doripenem                                      | 0.06                     | 0.06              | 0.015 – >4    | 97.8                       |
|                                                   | Imipenem                                       | 0.25                     | 0.25              | 0.12 – >8     | 96.7                       |
|                                                   | Meropenem                                      | 0.03                     | 0.06              | 0.015 – >8    | 97.8                       |
|                                                   | Amikacin                                       | 4                        | 16                | 1 – >32       | 96.1                       |
|                                                   | Colistin (n=93) <sup>d</sup>                   | 0.5                      | 1                 | 0.25 – 4      | 96.8                       |
|                                                   | Tigecycline                                    | 0.25                     | 0.5               | 0.06 – 8      | 99.4                       |
|                                                   | Levofloxacin                                   | >4                       | >4                | ≤0.03 – >4    | 18.9                       |
|                                                   | Ceftazidime-nonsusceptible, MBL-negative (178) | Ceftazidime-avibactam    | 0.12              | 0.5           | ≤0.015 – 4                 |
| Ceftazidime                                       |                                                | 32                       | 128               | 8 – >128      | 0                          |
| Cefepime                                          |                                                | >16                      | >16               | ≤0.12 – >16   | 9.6                        |
| Aztreonam                                         |                                                | 64                       | 128               | 2 – >128      | 2.8                        |
| Piperacillin-tazobactam                           |                                                | 4                        | 128               | 0.5 – >128    | 81.5                       |
| Doripenem                                         |                                                | 0.06                     | 0.06              | 0.015 – >4    | 98.9                       |
| Imipenem                                          |                                                | 0.25                     | 0.25              | 0.12 – >8     | 97.8                       |
| Meropenem                                         |                                                | 0.03                     | 0.06              | 0.015 – >8    | 98.9                       |
| Amikacin                                          |                                                | 4                        | 16                | 1 – >32       | 96.6                       |
| Colistin (n=92) <sup>d</sup>                      |                                                | 0.5                      | 1                 | 0.25 – 4      | 96.7                       |
| Tigecycline                                       |                                                | 0.25                     | 0.5               | 0.06 – 8      | 99.4                       |

| Phenotype/Organism (no. of isolates) <sup>a</sup> | Antimicrobial agent                     | MIC (μg/ml) <sup>b</sup> |                   |               | % Susceptible <sup>c</sup> |     |
|---------------------------------------------------|-----------------------------------------|--------------------------|-------------------|---------------|----------------------------|-----|
|                                                   |                                         | MIC <sub>50</sub>        | MIC <sub>90</sub> | Range         |                            |     |
|                                                   | Levofloxacin                            | >4                       | >4                | ≤0.03 – >4    | 19.1                       |     |
| Meropenem-nonsusceptible (4)                      | Ceftazidime–avibactam                   | — <sup>b</sup>           | —                 | 2 – >128      | 50.0                       |     |
|                                                   | Ceftazidime                             | —                        | —                 | >128 – >128   | 0                          |     |
|                                                   | Cefepime                                | —                        | —                 | 16 – >16      | 0.0                        |     |
|                                                   | Aztreonam                               | —                        | —                 | 64 – >128     | 0                          |     |
|                                                   | Piperacillin–tazobactam                 | —                        | —                 | >128 – >128   | 0                          |     |
|                                                   | Doripenem                               | —                        | —                 | >4 – >4       | 0                          |     |
|                                                   | Imipenem                                | —                        | —                 | >8 – >8       | 0                          |     |
|                                                   | Meropenem                               | —                        | —                 | >8 – >8       | 0                          |     |
|                                                   | Amikacin                                | —                        | —                 | 2 – >32       | 75.0                       |     |
|                                                   | Colistin (n=2) <sup>d</sup>             | —                        | —                 | 0.25 – 1      | 100                        |     |
|                                                   | Tigecycline                             | —                        | —                 | 0.06 – 0.5    | 100                        |     |
| Levofloxacin                                      | —                                       | —                        | 1 – >4            | 25.0          |                            |     |
| Meropenem-nonsusceptible, MBL–negative (2)        | Ceftazidime–avibactam                   | — <sup>b</sup>           | —                 | 2 – 2         | 100                        |     |
|                                                   | Ceftazidime                             | —                        | —                 | >128 – >128   | 0                          |     |
|                                                   | Cefepime                                | —                        | —                 | 16 – >16      | 0                          |     |
|                                                   | Aztreonam                               | —                        | —                 | 128 – >128    | 0                          |     |
|                                                   | Piperacillin–tazobactam                 | —                        | —                 | >128 – >128   | 0                          |     |
|                                                   | Doripenem                               | —                        | —                 | >4 – >4       | 0                          |     |
|                                                   | Imipenem                                | —                        | —                 | >8 – >8       | 0                          |     |
|                                                   | Meropenem                               | —                        | —                 | >8 – >8       | 0                          |     |
|                                                   | Amikacin                                | —                        | —                 | 2 – 8         | 100                        |     |
|                                                   | Colistin (n=1) <sup>d</sup>             | —                        | —                 | 0.25          | 100                        |     |
|                                                   | Tigecycline                             | —                        | —                 | 0.06 – 0.12   | 100                        |     |
|                                                   | Levofloxacin                            | —                        | —                 | 1 – >4        | 50.0                       |     |
|                                                   | Colistin–resistant (3)                  | Ceftazidime–avibactam    | — <sup>b</sup>    | —             | 0.12 – 0.5                 | 100 |
| Ceftazidime                                       |                                         | —                        | —                 | 8 – >128      | 0                          |     |
| Cefepime                                          |                                         | —                        | —                 | 4 – >16       | 0                          |     |
| Aztreonam                                         |                                         | —                        | —                 | 32 – 64       | 0                          |     |
| Piperacillin–tazobactam                           |                                         | —                        | —                 | 1 – >128      | 66.7                       |     |
| Doripenem                                         |                                         | —                        | —                 | 0.03 – 0.12   | 100                        |     |
| Imipenem                                          |                                         | —                        | —                 | 0.12 – 2      | 66.7                       |     |
| Meropenem                                         |                                         | —                        | —                 | 0.03 – 0.12   | 100                        |     |
| Amikacin                                          |                                         | —                        | —                 | 2 – 2         | 100                        |     |
| Colistin (n=3) <sup>d</sup>                       |                                         | —                        | —                 | 4 – 4         | 0                          |     |
| Tigecycline                                       |                                         | —                        | —                 | 0.25 – 2      | 100                        |     |
| Levofloxacin                                      | —                                       | —                        | 2 – >4            | 33.3          |                            |     |
| Multidrug–resistant (134)                         | Ceftazidime–avibactam                   | 0.12                     | 0.5               | ≤0.015 – >128 | 98.5                       |     |
|                                                   | Ceftazidime                             | 32                       | >128              | 1 – >128      | 5.2                        |     |
|                                                   | Cefepime                                | >16                      | >16               | 4 – >16       | 0                          |     |
|                                                   | Aztreonam                               | 64                       | 128               | 16 – >128     | 0                          |     |
|                                                   | Piperacillin–tazobactam                 | 8                        | >128              | 0.5 – >128    | 76.9                       |     |
|                                                   | Doripenem                               | 0.06                     | 0.12              | 0.015 – >4    | 97.0                       |     |
|                                                   | Imipenem                                | 0.25                     | 0.25              | 0.12 – >8     | 95.5                       |     |
|                                                   | Meropenem                               | 0.03                     | 0.12              | 0.015 – >8    | 97.0                       |     |
|                                                   | Amikacin                                | 4                        | 16                | 0.5 – >32     | 94.8                       |     |
|                                                   | Colistin (n=64) <sup>d</sup>            | 0.5                      | 1                 | 0.25 – 4      | 95.3                       |     |
|                                                   | Tigecycline                             | 0.25                     | 0.5               | 0.06 – 2      | 100                        |     |
|                                                   | Levofloxacin                            | >4                       | >4                | 0.12 – >4     | 3.0                        |     |
|                                                   | Multidrug–resistant, MBL–negative (132) | Ceftazidime–avibactam    | 0.12              | 0.5           | ≤0.015 – 4                 | 100 |
|                                                   |                                         | Ceftazidime              | 32                | >128          | 1 – >128                   | 5.3 |
| Cefepime                                          |                                         | >16                      | >16               | 4 – >16       | 0                          |     |
| Aztreonam                                         |                                         | 64                       | 128               | 16 – >128     | 0                          |     |
| Piperacillin–tazobactam                           |                                         | 8                        | >128              | 0.5 – >128    | 78.0                       |     |
| Doripenem                                         |                                         | 0.06                     | 0.06              | 0.015 – >4    | 98.5                       |     |
| Imipenem                                          |                                         | 0.25                     | 0.25              | 0.12 – >8     | 97.0                       |     |
| Meropenem                                         |                                         | 0.03                     | 0.06              | 0.015 – >8    | 98.5                       |     |
| Amikacin                                          |                                         | 4                        | 16                | 0.5 – >32     | 95.5                       |     |
| Colistin (n=63) <sup>d</sup>                      |                                         | 0.5                      | 1                 | 0.25 – 4      | 95.2                       |     |

| Phenotype/Organism (no. of isolates) <sup>a</sup> | Antimicrobial agent           | MIC (µg/ml) <sup>b</sup> |                   |               | % Susceptible <sup>c</sup> |
|---------------------------------------------------|-------------------------------|--------------------------|-------------------|---------------|----------------------------|
|                                                   |                               | MIC <sub>50</sub>        | MIC <sub>90</sub> | Range         |                            |
|                                                   | Tigecycline                   | 0.25                     | 0.5               | 0.06 – 2      | 100                        |
|                                                   | Levofloxacin                  | >4                       | >4                | 0.12 – >4     | 3.0                        |
| <i>Klebsiella pneumoniae</i>                      |                               |                          |                   |               |                            |
| All (359)                                         | Ceftazidime–avibactam         | 0.12                     | 1                 | ≤0.015 – >128 | 96.9                       |
|                                                   | Ceftazidime                   | 0.5                      | >128              | 0.03 – >128   | 57.9                       |
|                                                   | Cefepime                      | ≤0.12                    | >16               | ≤0.12 – >16   | 59.6                       |
|                                                   | Aztreonam                     | 0.25                     | >128              | ≤0.015 – >128 | 58.5                       |
|                                                   | Piperacillin–tazobactam       | 4                        | >128              | ≤0.25 – >128  | 70.5                       |
|                                                   | Doripenem                     | 0.06                     | 0.12              | 0.03 – >4     | 96.7                       |
|                                                   | Imipenem                      | 0.25                     | 1                 | 0.12 – >8     | 93.6                       |
|                                                   | Meropenem                     | 0.06                     | 0.12              | 0.015 – >8    | 95.5                       |
|                                                   | Amikacin                      | 1                        | 4                 | 0.5 – >32     | 98.1                       |
|                                                   | Colistin (n=215) <sup>d</sup> | 1                        | 1                 | 0.25 – >4     | 95.4                       |
|                                                   | Tigecycline                   | 0.5                      | 2                 | 0.06 – 8      | 96.9                       |
|                                                   | Levofloxacin                  | 1                        | >4                | ≤0.03 – >4    | 69.1                       |
| All, MBL–negative (348)                           | Ceftazidime–avibactam         | 0.12                     | 0.5               | ≤0.015 – 4    | 100                        |
|                                                   | Ceftazidime                   | 0.5                      | >128              | 0.03 – >128   | 59.8                       |
|                                                   | Cefepime                      | ≤0.12                    | >16               | ≤0.12 – >16   | 61.5                       |
|                                                   | Aztreonam                     | 0.12                     | >128              | ≤0.015 – >128 | 60.1                       |
|                                                   | Piperacillin–tazobactam       | 4                        | >128              | ≤0.25 – >128  | 72.7                       |
|                                                   | Doripenem                     | 0.06                     | 0.12              | 0.03 – 4      | 99.7                       |
|                                                   | Imipenem                      | 0.25                     | 1                 | 0.12 – >8     | 96.6                       |
|                                                   | Meropenem                     | 0.06                     | 0.06              | 0.015 – 8     | 98.6                       |
|                                                   | Amikacin                      | 1                        | 4                 | 0.5 – >32     | 98.6                       |
|                                                   | Colistin (n=206) <sup>d</sup> | 1                        | 1                 | 0.25 – >4     | 95.6                       |
|                                                   | Tigecycline                   | 0.5                      | 2                 | 0.06 – 8      | 96.8                       |
|                                                   | Levofloxacin                  | 0.5                      | >4                | ≤0.03 – >4    | 70.7                       |
| Ceftazidime-nonsusceptible (151)                  | Ceftazidime–avibactam         | 0.5                      | 1                 | 0.03 – >128   | 92.7                       |
|                                                   | Ceftazidime                   | 128                      | >128              | 8 – >128      | 0                          |
|                                                   | Cefepime                      | >16                      | >16               | ≤0.12 – >16   | 9.9                        |
|                                                   | Aztreonam                     | 128                      | >128              | 0.25 – >128   | 4.0                        |
|                                                   | Piperacillin–tazobactam       | 64                       | >128              | 2 – >128      | 36.4                       |
|                                                   | Doripenem                     | 0.06                     | 0.25              | 0.03 – >4     | 92.1                       |
|                                                   | Imipenem                      | 0.25                     | 2                 | 0.12 – >8     | 87.4                       |
|                                                   | Meropenem                     | 0.06                     | 0.25              | 0.03 – >8     | 90.1                       |
|                                                   | Amikacin                      | 2                        | 8                 | 0.5 – >32     | 95.4                       |
|                                                   | Colistin (n=96) <sup>d</sup>  | 1                        | 2                 | 0.25 – >4     | 92.7                       |
|                                                   | Tigecycline                   | 1                        | 2                 | 0.06 – 8      | 96.7                       |
|                                                   | Levofloxacin                  | >4                       | >4                | ≤0.03 – >4    | 44.4                       |
| Ceftazidime-nonsusceptible, MBL–negative (140)    | Ceftazidime–avibactam         | 0.25                     | 1                 | 0.03 – 4      | 100                        |
|                                                   | Ceftazidime                   | 64                       | >128              | 8 – >128      | 0                          |
|                                                   | Cefepime                      | >16                      | >16               | ≤0.12 – >16   | 10.7                       |
|                                                   | Aztreonam                     | 128                      | >128              | 1 – >128      | 3.6                        |
|                                                   | Piperacillin–tazobactam       | 32                       | >128              | 2 – >128      | 39.3                       |
|                                                   | Doripenem                     | 0.06                     | 0.25              | 0.03 – 4      | 99.3                       |
|                                                   | Imipenem                      | 0.25                     | 1                 | 0.12 – >8     | 94.3                       |
|                                                   | Meropenem                     | 0.06                     | 0.12              | 0.03 – 8      | 97.1                       |
|                                                   | Amikacin                      | 2                        | 8                 | 0.5 – >32     | 96.4                       |
|                                                   | Colistin (n=87) <sup>d</sup>  | 1                        | 2                 | 0.25 – >4     | 93.1                       |
|                                                   | Tigecycline                   | 1                        | 2                 | 0.06 – 8      | 96.4                       |
|                                                   | Levofloxacin                  | 4                        | >4                | ≤0.03 – >4    | 46.4                       |
| Meropenem-nonsusceptible (16)                     | Ceftazidime–avibactam         | >128                     | >128              | 0.12 – >128   | 31.3                       |
|                                                   | Ceftazidime                   | >128                     | >128              | 0.5 – >128    | 6.3                        |
|                                                   | Cefepime                      | >16                      | >16               | ≤0.12 – >16   | 12.5                       |
|                                                   | Aztreonam                     | 128                      | >128              | 0.12 – >128   | 12.5                       |
|                                                   | Piperacillin–tazobactam       | >128                     | >128              | 128 – >128    | 0                          |
|                                                   | Doripenem                     | >4                       | >8                | 0.12 – >4     | 25.0                       |
|                                                   | Imipenem                      | >8                       | >8                | 0.25 – >8     | 12.5                       |
|                                                   | Meropenem                     | >8                       | >8                | 2 – >8        | 0                          |

| Phenotype/Organism (no. of isolates) <sup>a</sup> | Antimicrobial agent          | MIC (µg/ml) <sup>b</sup> |                   |             | % Susceptible <sup>c</sup> |
|---------------------------------------------------|------------------------------|--------------------------|-------------------|-------------|----------------------------|
|                                                   |                              | MIC <sub>50</sub>        | MIC <sub>90</sub> | Range       |                            |
|                                                   | Amikacin                     | 4                        | >32               | 0.5 – >32   | 87.5                       |
|                                                   | Colistin (n=13) <sup>d</sup> | 0.5                      | >4                | 0.25 – >4   | 76.9                       |
|                                                   | Tigecycline                  | 1                        | 2                 | 0.5 – 2     | 100                        |
|                                                   | Levofloxacin                 | >4                       | >4                | 1 – >4      | 18.8                       |
| Meropenem-nonsusceptible, MBL–negative (5)        | Ceftazidime–avibactam        | — <sup>b</sup>           | —                 | 0.12 – 4    | 100                        |
|                                                   | Ceftazidime                  | —                        | —                 | 0.5 – >128  | 20.0                       |
|                                                   | Cefepime                     | —                        | —                 | ≤0.12 – >16 | 40.0                       |
|                                                   | Aztreonam                    | —                        | —                 | 0.12 – >128 | 20.0                       |
|                                                   | Piperacillin–tazobactam      | —                        | —                 | 128 – >128  | 0                          |
|                                                   | Doripenem                    | —                        | —                 | 0.12 – 4    | 80.0                       |
|                                                   | Imipenem                     | —                        | —                 | 0.25 – 4    | 40.0                       |
|                                                   | Meropenem                    | —                        | —                 | 2 – 8       | 0                          |
|                                                   | Amikacin                     | —                        | —                 | 0.5 – 4     | 100                        |
|                                                   | Colistin (n=4) <sup>d</sup>  | —                        | —                 | 0.25 – >4   | 50.0                       |
|                                                   | Tigecycline                  | —                        | —                 | 0.5 – 1     | 100                        |
|                                                   | Levofloxacin                 | —                        | —                 | 1 – >4      | 20.0                       |
| Colistin–resistant (10)                           | Ceftazidime–avibactam        | 0.5                      | 4                 | 0.12 – >128 | 90.0                       |
|                                                   | Ceftazidime                  | 128                      | >128              | 0.12 – >128 | 30.0                       |
|                                                   | Cefepime                     | >16                      | >16               | ≤0.12 – >16 | 20.0                       |
|                                                   | Aztreonam                    | 128                      | >128              | 0.06 – >128 | 20.0                       |
|                                                   | Piperacillin–tazobactam      | >128                     | >128              | 1 – >128    | 30.0                       |
|                                                   | Doripenem                    | 0.12                     | 4                 | 0.06 – >4   | 80.0                       |
|                                                   | Imipenem                     | 0.25                     | 4                 | 0.12 – >8   | 70.0                       |
|                                                   | Meropenem                    | 0.06                     | 8                 | 0.06 – >8   | 70.0                       |
|                                                   | Amikacin                     | 1                        | 8                 | 1 – >32     | 90.0                       |
|                                                   | Colistin (n=10) <sup>d</sup> | >4                       | >4                | 4 – >4      | 0                          |
|                                                   | Tigecycline                  | 0.5                      | 1                 | 0.12 – 2    | 100                        |
|                                                   | Levofloxacin                 | 4                        | >4                | 0.06 – >4   | 40.0                       |
| Colistin–resistant, MBL–negative (9)              | Ceftazidime–avibactam        | — <sup>b</sup>           | —                 | 0.12 – 4    | 100                        |
|                                                   | Ceftazidime                  | —                        | —                 | 0.12 – >128 | 33.3                       |
|                                                   | Cefepime                     | —                        | —                 | ≤0.12 – >16 | 22.2                       |
|                                                   | Aztreonam                    | —                        | —                 | 0.06 – >128 | 22.2                       |
|                                                   | Piperacillin–tazobactam      | —                        | —                 | 1 – >128    | 33.3                       |
|                                                   | Doripenem                    | —                        | —                 | 0.06 – 4    | 88.9                       |
|                                                   | Imipenem                     | —                        | —                 | 0.12 – 4    | 77.8                       |
|                                                   | Meropenem                    | —                        | —                 | 0.06 – 8    | 77.8                       |
|                                                   | Amikacin                     | —                        | —                 | 1 – 8       | 100                        |
|                                                   | Colistin (n=9) <sup>d</sup>  | —                        | —                 | 4 – >4      | 0                          |
|                                                   | Tigecycline                  | —                        | —                 | 0.12 – 1    | 100                        |
|                                                   | Levofloxacin                 | —                        | —                 | 0.06 – >4   | 44.4                       |
| Multidrug–resistant (94)                          | Ceftazidime–avibactam        | 0.5                      | >128              | 0.03 – >128 | 88.3                       |
|                                                   | Ceftazidime                  | >128                     | >128              | 0.5 – >128  | 1.1                        |
|                                                   | Cefepime                     | >16                      | >16               | ≤0.12 – >16 | 2.1                        |
|                                                   | Aztreonam                    | 128                      | >128              | 0.12 – >128 | 2.1                        |
|                                                   | Piperacillin–tazobactam      | >128                     | >128              | 4 – >128    | 11.7                       |
|                                                   | Doripenem                    | 0.06                     | >4                | 0.03 – >4   | 87.2                       |
|                                                   | Imipenem                     | 0.25                     | >8                | 0.12 – >8   | 81.9                       |
|                                                   | Meropenem                    | 0.06                     | >8                | 0.03 – >8   | 84.0                       |
|                                                   | Amikacin                     | 2                        | 8                 | 0.5 – >32   | 94.7                       |
|                                                   | Colistin (n=57) <sup>d</sup> | 1                        | 4                 | 0.25 – >4   | 86.0                       |
|                                                   | Tigecycline                  | 1                        | 2                 | 0.06 – 8    | 94.7                       |
|                                                   | Levofloxacin                 | >4                       | >4                | ≤0.03 – >4  | 25.5                       |
| Multidrug–resistant, MBL–negative (83)            | Ceftazidime–avibactam        | 0.5                      | 1                 | 0.03 – 4    | 100                        |
|                                                   | Ceftazidime                  | 128                      | >128              | 0.5 – >128  | 1.2                        |
|                                                   | Cefepime                     | >16                      | >16               | ≤0.12 – >16 | 2.4                        |
|                                                   | Aztreonam                    | 128                      | >128              | 0.12 – >128 | 1.2                        |
|                                                   | Piperacillin–tazobactam      | >128                     | >128              | 4 – >128    | 13.3                       |
|                                                   | Doripenem                    | 0.06                     | 0.25              | 0.03 – 4    | 98.8                       |
|                                                   | Imipenem                     | 0.25                     | 1                 | 0.12 – >8   | 92.8                       |



| Phenotype/Organism (no. of isolates) <sup>a</sup> | Antimicrobial agent          | MIC (µg/ml) <sup>b</sup> |                   |                 | % Susceptible <sup>c</sup> |
|---------------------------------------------------|------------------------------|--------------------------|-------------------|-----------------|----------------------------|
|                                                   |                              | MIC <sub>50</sub>        | MIC <sub>90</sub> | Range           |                            |
|                                                   | Meropenem                    | 0.06                     | 0.12              | 0.03 – 8        | 95.2                       |
|                                                   | Amikacin                     | 2                        | 8                 | 0.5 – >32       | 96.4                       |
|                                                   | Colistin (n=48) <sup>d</sup> | 1                        | 4                 | 0.25 – >4       | 85.4                       |
|                                                   | Tigecycline                  | 1                        | 2                 | 0.06 – 8        | 94.0                       |
|                                                   | Levofloxacin                 | >4                       | >4                | ≤0.03 – >4      | 26.5                       |
| <i>Klebsiella oxytoca</i> <sup>f</sup>            |                              |                          |                   |                 |                            |
| All (51)                                          | Ceftazidime–avibactam        | 0.06                     | 0.12              | ≤0.015 – 0.5    | 100                        |
|                                                   | Ceftazidime                  | 0.12                     | 4                 | 0.03 – 128      | 92.2                       |
|                                                   | Cefepime                     | ≤0.12                    | 2                 | ≤0.12 – >16     | 92.2                       |
|                                                   | Aztreonam                    | 0.25                     | 8                 | ≤0.015 – 128    | 88.2                       |
|                                                   | Piperacillin–tazobactam      | 2                        | 4                 | 0.5 – 32        | 98.0                       |
|                                                   | Doripenem                    | 0.06                     | 0.06              | 0.03 – 0.12     | 100                        |
|                                                   | Imipenem                     | 0.25                     | 0.5               | 0.12 – 1        | 100                        |
|                                                   | Meropenem                    | 0.03                     | 0.06              | 0.015 – 0.06    | 100                        |
|                                                   | Amikacin                     | 2                        | 4                 | 0.5 – 8         | 100                        |
|                                                   | Colistin (n=25) <sup>d</sup> | 0.5                      | 1                 | 0.25 – 4        | 96.0                       |
|                                                   | Tigecycline                  | 0.25                     | 0.5               | 0.06 – 1        | 100                        |
|                                                   | Levofloxacin                 | 0.06                     | 0.5               | ≤0.03 – >4      | 94.1                       |
| Ceftazidime-nonsusceptible (4)                    | Ceftazidime–avibactam        | — <sup>b</sup>           | —                 | 0.06 – 0.5      | 100                        |
|                                                   | Ceftazidime                  | —                        | —                 | 8 – 128         | 0                          |
|                                                   | Cefepime                     | —                        | —                 | 2 – >16         | 25.0                       |
|                                                   | Aztreonam                    | —                        | —                 | 8 – 128         | 0                          |
|                                                   | Piperacillin–tazobactam      | —                        | —                 | 1 – 32          | 75.0                       |
|                                                   | Doripenem                    | —                        | —                 | 0.06 – 0.12     | 100                        |
|                                                   | Imipenem                     | —                        | —                 | 0.25 – 0.25     | 100                        |
|                                                   | Meropenem                    | —                        | —                 | 0.03 – 0.06     | 100                        |
|                                                   | Amikacin                     | —                        | —                 | 0.5 – 4         | 100                        |
|                                                   | Colistin (n=2) <sup>d</sup>  | —                        | —                 | 0.25 – 0.25     | 100                        |
|                                                   | Tigecycline                  | —                        | —                 | 0.25 – 1        | 100                        |
|                                                   | Levofloxacin                 | —                        | —                 | 0.5 – >4        | 25.0                       |
| Colistin-resistant (1)                            | Ceftazidime–avibactam        | — <sup>b</sup>           | —                 | 0.12            | 100                        |
|                                                   | Ceftazidime                  | —                        | —                 | 0.12            | 100                        |
|                                                   | Cefepime                     | —                        | —                 | ≤0.12           | 100                        |
|                                                   | Aztreonam                    | —                        | —                 | 0.5             | 100                        |
|                                                   | Piperacillin–tazobactam      | —                        | —                 | 4               | 100                        |
|                                                   | Doripenem                    | —                        | —                 | 0.06            | 100                        |
|                                                   | Imipenem                     | —                        | —                 | 0.5             | 100                        |
|                                                   | Meropenem                    | —                        | —                 | 0.06            | 100                        |
|                                                   | Amikacin                     | —                        | —                 | 2               | 100                        |
|                                                   | Colistin (n=1) <sup>d</sup>  | —                        | —                 | 4               | 0                          |
|                                                   | Tigecycline                  | —                        | —                 | 0.5             | 100                        |
|                                                   | Levofloxacin                 | —                        | —                 | 0.12            | 100                        |
| Multidrug-resistant (1)                           | Ceftazidime–avibactam        | — <sup>b</sup>           | —                 | 0.5             | 100                        |
|                                                   | Ceftazidime                  | —                        | —                 | 128             | 0                          |
|                                                   | Cefepime                     | —                        | —                 | >16             | 0                          |
|                                                   | Aztreonam                    | —                        | —                 | 128             | 0                          |
|                                                   | Piperacillin–tazobactam      | —                        | —                 | 32              | 0                          |
|                                                   | Doripenem                    | —                        | —                 | 0.06            | 100                        |
|                                                   | Imipenem                     | —                        | —                 | 0.25            | 100                        |
|                                                   | Meropenem                    | —                        | —                 | 0.03            | 100                        |
|                                                   | Amikacin                     | —                        | —                 | 4               | 100                        |
|                                                   | Colistin (n=0) <sup>d</sup>  | —                        | —                 | ND <sup>e</sup> | ND                         |
|                                                   | Tigecycline                  | —                        | —                 | 1               | 100                        |
|                                                   | Levofloxacin                 | —                        | —                 | >4              | 0                          |
| <i>Enterobacter</i> spp.                          |                              |                          |                   |                 |                            |
| All (149) <sup>h</sup>                            | Ceftazidime–avibactam        | 0.25                     | 1                 | ≤0.015 – >128   | 97.3                       |
|                                                   | Ceftazidime                  | 0.5                      | >128              | 0.06 – >128     | 62.4                       |
|                                                   | Cefepime                     | ≤0.12                    | >16               | ≤0.12 – >16     | 79.9                       |
|                                                   | Aztreonam                    | 0.12                     | 64                | 0.03 – >128     | 65.8                       |

| Phenotype/Organism (no. of isolates) <sup>a</sup> | Antimicrobial agent          | MIC ( $\mu\text{g/ml}$ ) <sup>b</sup> |                   |             | % Susceptible <sup>c</sup> |
|---------------------------------------------------|------------------------------|---------------------------------------|-------------------|-------------|----------------------------|
|                                                   |                              | MIC <sub>50</sub>                     | MIC <sub>90</sub> | Range       |                            |
|                                                   | Piperacillin–tazobactam      | 4                                     | 128               | 0.5 – >128  | 75.8                       |
|                                                   | Doripenem                    | 0.06                                  | 0.25              | 0.03 – >4   | 98.7                       |
|                                                   | Imipenem                     | 1                                     | 2                 | 0.06 – >8   | 82.6                       |
|                                                   | Meropenem                    | 0.06                                  | 0.12              | 0.03 – >8   | 98.7                       |
|                                                   | Amikacin                     | 1                                     | 4                 | 0.5 – >32   | 98.0                       |
|                                                   | Colistin (n=80) <sup>d</sup> | 0.5                                   | >4                | 0.25 – >4   | 87.5                       |
|                                                   | Tigecycline                  | 0.5                                   | 2                 | 0.06 – 4    | 98.7                       |
|                                                   | Levofloxacin                 | 0.06                                  | 2                 | ≤0.03 – >4  | 91.3                       |
| All, MBL–negative (147)                           | Ceftazidime–avibactam        | 0.25                                  | 1                 | ≤0.015 – 64 | 98.6                       |
|                                                   | Ceftazidime                  | 0.5                                   | 128               | 0.06 – >128 | 63.3                       |
|                                                   | Cefepime                     | ≤0.12                                 | >16               | ≤0.12 – >16 | 81.0                       |
|                                                   | Aztreonam                    | 0.12                                  | 64                | 0.03 – >128 | 65.3                       |
|                                                   | Piperacillin–tazobactam      | 4                                     | 128               | 0.5 – >128  | 76.2                       |
|                                                   | Doripenem                    | 0.06                                  | 0.25              | 0.03 – 0.5  | 100                        |
|                                                   | Imipenem                     | 1                                     | 2                 | 0.06 – 4    | 83.7                       |
|                                                   | Meropenem                    | 0.06                                  | 0.12              | 0.03 – 1    | 100                        |
|                                                   | Amikacin                     | 1                                     | 4                 | 0.5 – >32   | 98.0                       |
|                                                   | Colistin (n=79) <sup>d</sup> | 0.5                                   | >4                | 0.25 – >4   | 88.6                       |
|                                                   | Tigecycline                  | 0.5                                   | 2                 | 0.06 – 4    | 98.6                       |
|                                                   | Levofloxacin                 | 0.06                                  | 2                 | ≤0.03 – >4  | 91.2                       |
| Ceftazidime-nonsusceptible (56)                   | Ceftazidime–avibactam        | 0.5                                   | 2                 | 0.12 – >128 | 92.9                       |
|                                                   | Ceftazidime                  | 64                                    | >128              | 8 – >128    | 0                          |
|                                                   | Cefepime                     | 4                                     | >16               | ≤0.12 – >16 | 48.2                       |
|                                                   | Aztreonam                    | 32                                    | >128              | 0.06 – >128 | 8.9                        |
|                                                   | Piperacillin–tazobactam      | 32                                    | >128              | 2 – >128    | 35.7                       |
|                                                   | Doripenem                    | 0.12                                  | 0.5               | 0.03 – >4   | 96.4                       |
|                                                   | Imipenem                     | 0.5                                   | 2                 | 0.06 – >8   | 89.3                       |
|                                                   | Meropenem                    | 0.06                                  | 0.25              | 0.03 – >8   | 96.4                       |
|                                                   | Amikacin                     | 2                                     | 8                 | 0.5 – >32   | 96.4                       |
|                                                   | Colistin (n=34) <sup>d</sup> | 0.5                                   | 1                 | 0.25 – >4   | 91.2                       |
|                                                   | Tigecycline                  | 0.5                                   | 2                 | 0.06 – 4    | 96.4                       |
|                                                   | Levofloxacin                 | 0.5                                   | >4                | ≤0.03 – >4  | 83.9                       |
| Ceftazidime-nonsusceptible, MBL–negative (54)     | Ceftazidime–avibactam        | 0.5                                   | 2                 | 0.12 – 64   | 96.3                       |
|                                                   | Ceftazidime                  | 64                                    | >128              | 8 – >128    | 0                          |
|                                                   | Cefepime                     | 2                                     | >16               | ≤0.12 – >16 | 50.0                       |
|                                                   | Aztreonam                    | 32                                    | >128              | 1 – >128    | 5.6                        |
|                                                   | Piperacillin–tazobactam      | 32                                    | >128              | 2 – >128    | 35.2                       |
|                                                   | Doripenem                    | 0.12                                  | 0.25              | 0.03 – 0.5  | 100                        |
|                                                   | Imipenem                     | 0.5                                   | 1                 | 0.06 – 2    | 92.6                       |
|                                                   | Meropenem                    | 0.06                                  | 0.25              | 0.03 – 1    | 100                        |
|                                                   | Amikacin                     | 2                                     | 8                 | 0.5 – >32   | 96.3                       |
|                                                   | Colistin (n=33) <sup>d</sup> | 0.5                                   | 1                 | 0.25 – >4   | 93.9                       |
|                                                   | Tigecycline                  | 0.5                                   | 2                 | 0.06 – 4    | 96.3                       |
|                                                   | Levofloxacin                 | 0.5                                   | >4                | ≤0.03 – >4  | 83.3                       |
| Meropenem-nonsusceptible (2) <sup>i</sup>         | Ceftazidime–avibactam        | — <sup>b</sup>                        | —                 | >128 – >128 | 0                          |
|                                                   | Ceftazidime                  | —                                     | —                 | >128 – >128 | 0                          |
|                                                   | Cefepime                     | —                                     | —                 | >16 – >16   | 0                          |
|                                                   | Aztreonam                    | —                                     | —                 | 0.06 – 0.5  | 100                        |
|                                                   | Piperacillin–tazobactam      | —                                     | —                 | 4 – >128    | 50.0                       |
|                                                   | Doripenem                    | —                                     | —                 | >4 – >4     | 0                          |
|                                                   | Imipenem                     | —                                     | —                 | >8 – >8     | 0                          |
|                                                   | Meropenem                    | —                                     | —                 | >8 – >8     | 0                          |
|                                                   | Amikacin                     | —                                     | —                 | 1 – 2       | 100                        |
|                                                   | Colistin (n=1) <sup>d</sup>  | —                                     | —                 | >4          | 0                          |
|                                                   | Tigecycline                  | —                                     | —                 | 0.5 – 0.5   | 100                        |
|                                                   | Levofloxacin                 | —                                     | —                 | 0.06 – 1    | 100                        |
| Colistin–resistant (10)                           | Ceftazidime–avibactam        | 0.25                                  | 1                 | 0.12 – >128 | 90.0                       |
|                                                   | Ceftazidime                  | 0.5                                   | 32                | 0.25 – >128 | 70.0                       |
|                                                   | Cefepime                     | ≤0.12                                 | >16               | ≤0.12 – >16 | 80.0                       |

| Phenotype/Organism (no. of isolates) <sup>a</sup> | Antimicrobial agent          | MIC ( $\mu\text{g/ml}$ ) <sup>b</sup> |                   |              | % Susceptible <sup>c</sup> |
|---------------------------------------------------|------------------------------|---------------------------------------|-------------------|--------------|----------------------------|
|                                                   |                              | MIC <sub>50</sub>                     | MIC <sub>90</sub> | Range        |                            |
|                                                   | Aztreonam                    | 0.12                                  | 16                | 0.06 – 32    | 80.0                       |
|                                                   | Piperacillin–tazobactam      | 4                                     | 8                 | 0.5 – >128   | 90.0                       |
|                                                   | Doripenem                    | 0.06                                  | 0.12              | 0.03 – >4    | 90.0                       |
|                                                   | Imipenem                     | 0.5                                   | 2                 | 0.25 – >8    | 80.0                       |
|                                                   | Meropenem                    | 0.06                                  | 0.12              | 0.03 – >8    | 90.0                       |
|                                                   | Amikacin                     | 2                                     | 2                 | 1 – 8        | 100                        |
|                                                   | Colistin (n=10) <sup>d</sup> | >4                                    | >4                | >4 – >4      | 0                          |
|                                                   | Tigecycline                  | 0.5                                   | 1                 | 0.25 – 1     | 100                        |
|                                                   | Levofloxacin                 | 0.06                                  | 0.12              | 0.06 – 1     | 100                        |
| Colistin–resistant, MBL–negative (9)              | Ceftazidime–avibactam        | — <sup>b</sup>                        | —                 | 0.12 – 1     | 100                        |
|                                                   | Ceftazidime                  | —                                     | —                 | 0.25 – 32    | 77.8                       |
|                                                   | Cefepime                     | —                                     | —                 | ≤0.12 – >16  | 88.9                       |
|                                                   | Aztreonam                    | —                                     | —                 | 0.06 – 32    | 77.8                       |
|                                                   | Piperacillin–tazobactam      | —                                     | —                 | 0.5 – 8      | 100                        |
|                                                   | Doripenem                    | —                                     | —                 | 0.03 – 0.12  | 100                        |
|                                                   | Imipenem                     | —                                     | —                 | 0.25 – 2     | 88.9                       |
|                                                   | Meropenem                    | —                                     | —                 | 0.03 – 0.12  | 100                        |
|                                                   | Amikacin                     | —                                     | —                 | 1 – 8        | 100                        |
|                                                   | Colistin (n=9) <sup>d</sup>  | —                                     | —                 | >4 – >4      | 0                          |
|                                                   | Tigecycline                  | —                                     | —                 | 0.25 – 1     | 100                        |
|                                                   | Levofloxacin                 | —                                     | —                 | 0.06 – 1     | 100                        |
| Multidrug–resistant (12)                          | Ceftazidime–avibactam        | 2                                     | 64                | 0.25 – >128  | 75.0                       |
|                                                   | Ceftazidime                  | >128                                  | >128              | 32 – >128    | 0                          |
|                                                   | Cefepime                     | >16                                   | >16               | 16 – >16     | 0                          |
|                                                   | Aztreonam                    | >128                                  | >128              | 0.06 – >128  | 8.3                        |
|                                                   | Piperacillin–tazobactam      | >128                                  | >128              | 8 – >128     | 8.3                        |
|                                                   | Doripenem                    | 0.25                                  | 0.5               | 0.03 – >4    | 91.7                       |
|                                                   | Imipenem                     | 0.5                                   | 2                 | 0.25 – >8    | 83.3                       |
|                                                   | Meropenem                    | 0.12                                  | 1                 | 0.03 – >8    | 91.7                       |
|                                                   | Amikacin                     | 8                                     | 32                | 1 – >32      | 83.3                       |
|                                                   | Colistin (n=9) <sup>d</sup>  | — <sup>b</sup>                        | —                 | 0.5 – >4     | 77.8                       |
|                                                   | Tigecycline                  | 2                                     | 2                 | 0.25 – 4     | 91.7                       |
|                                                   | Levofloxacin                 | >4                                    | >4                | 0.06 – >4    | 33.3                       |
| Multidrug–resistant, MBL–negative (11)            | Ceftazidime–avibactam        | 2                                     | 64                | 0.25 – 64    | 81.8                       |
|                                                   | Ceftazidime                  | >128                                  | >128              | 32 – >128    | 0                          |
|                                                   | Cefepime                     | >16                                   | >16               | 16 – >16     | 0                          |
|                                                   | Aztreonam                    | >128                                  | >128              | 32 – >128    | 0                          |
|                                                   | Piperacillin–tazobactam      | >128                                  | >128              | 8 – >128     | 9.1                        |
|                                                   | Doripenem                    | 0.25                                  | 0.5               | 0.03 – 0.5   | 100                        |
|                                                   | Imipenem                     | 0.5                                   | 1                 | 0.25 – 2     | 90.9                       |
|                                                   | Meropenem                    | 0.12                                  | 1                 | 0.03 – 1     | 100                        |
|                                                   | Amikacin                     | 8                                     | 32                | 1 – >32      | 81.8                       |
|                                                   | Colistin (n=8) <sup>d</sup>  | — <sup>b</sup>                        | —                 | 0.5 – >4     | 87.5                       |
|                                                   | Tigecycline                  | 2                                     | 2                 | 0.25 – 4     | 90.9                       |
|                                                   | Levofloxacin                 | >4                                    | >4                | 1 – >4       | 27.3                       |
| <i>Citrobacter</i> spp. <sup>f</sup>              |                              |                                       |                   |              |                            |
| All (69) <sup>j</sup>                             | Ceftazidime–avibactam        | 0.12                                  | 0.25              | ≤0.015 – 2   | 100                        |
|                                                   | Ceftazidime                  | 0.25                                  | 32                | 0.06 – >128  | 85.5                       |
|                                                   | Cefepime                     | ≤0.12                                 | 1                 | ≤0.12 – >16  | 92.8                       |
|                                                   | Aztreonam                    | 0.06                                  | 16                | 0.03 – 64    | 87.0                       |
|                                                   | Piperacillin–tazobactam      | 2                                     | 8                 | 1 – 128      | 94.2                       |
|                                                   | Doripenem                    | 0.06                                  | 0.06              | 0.015 – 0.25 | 100                        |
|                                                   | Imipenem                     | 0.25                                  | 1                 | 0.12 – 8     | 97.1                       |
|                                                   | Meropenem                    | 0.03                                  | 0.06              | 0.015 – 0.12 | 100                        |
|                                                   | Amikacin                     | 1                                     | 4                 | ≤0.25 – 8    | 100                        |
|                                                   | Colistin (n=32) <sup>d</sup> | 0.5                                   | 1                 | ≤0.12 – 1    | 100                        |
|                                                   | Tigecycline                  | 0.25                                  | 1                 | 0.06 – 2     | 100                        |
|                                                   | Levofloxacin                 | 0.06                                  | 1                 | ≤0.03 – >4   | 94.2                       |
| Ceftazidime–nonsusceptible (10)                   | Ceftazidime–avibactam        | 0.25                                  | 0.5               | 0.12 – 2     | 100                        |

| Phenotype/Organism (no. of isolates) <sup>a</sup> | Antimicrobial agent          | MIC (µg/ml) <sup>b</sup> |                   |                 | % Susceptible <sup>c</sup> |
|---------------------------------------------------|------------------------------|--------------------------|-------------------|-----------------|----------------------------|
|                                                   |                              | MIC <sub>50</sub>        | MIC <sub>90</sub> | Range           |                            |
|                                                   | Ceftazidime                  | 64                       | >128              | 8 – >128        | 0                          |
|                                                   | Cefepime                     | 1                        | 8                 | ≤0.12 – >16     | 70.0                       |
|                                                   | Aztreonam                    | 16                       | 32                | 0.5 – 64        | 40.0                       |
|                                                   | Piperacillin–tazobactam      | 16                       | 64                | 4 – 128         | 60.0                       |
|                                                   | Doripenem                    | 0.06                     | 0.06              | 0.03 – 0.25     | 100                        |
|                                                   | Imipenem                     | 0.5                      | 1                 | 0.12 – 1        | 100                        |
|                                                   | Meropenem                    | 0.03                     | 0.06              | 0.015 – 0.06    | 100                        |
|                                                   | Amikacin                     | 2                        | 4                 | 2 – 8           | 100                        |
|                                                   | Colistin (n=6) <sup>d</sup>  | — <sup>b</sup>           | —                 | 0.25 – 1        | 100                        |
|                                                   | Tigecycline                  | 0.5                      | 1                 | 0.25 – 2        | 100                        |
|                                                   | Levofloxacin                 | 1                        | >4                | 0.06 – >4       | 60.0                       |
| Multidrug-resistant (2)                           | Ceftazidime–avibactam        | — <sup>b</sup>           | —                 | 0.12 – 0.12     | 100                        |
|                                                   | Ceftazidime                  | —                        | —                 | 32 – 64         | 0                          |
|                                                   | Cefepime                     | —                        | —                 | 2 – >16         | 50.0                       |
|                                                   | Aztreonam                    | —                        | —                 | 32 – 64         | 0                          |
|                                                   | Piperacillin–tazobactam      | —                        | —                 | 64 – 128        | 0                          |
|                                                   | Doripenem                    | —                        | —                 | 0.06 – 0.06     | 100                        |
|                                                   | Imipenem                     | —                        | —                 | 1 – 1           | 100                        |
|                                                   | Meropenem                    | —                        | —                 | 0.03 – 0.06     | 100                        |
|                                                   | Amikacin                     | —                        | —                 | 4 – 4           | 100                        |
|                                                   | Colistin (n=0) <sup>d</sup>  | —                        | —                 | ND <sup>e</sup> | ND                         |
|                                                   | Tigecycline                  | —                        | —                 | 1 – 1           | 100                        |
|                                                   | Levofloxacin                 | —                        | —                 | >4 – >4         | 0                          |
| Proteaceae <sup>f</sup><br>All (180) <sup>k</sup> | Ceftazidime–avibactam        | 0.03                     | 0.12              | ≤0.015 – 0.5    | 100                        |
|                                                   | Ceftazidime                  | 0.06                     | 0.5               | ≤0.015 – 128    | 96.7                       |
|                                                   | Cefepime                     | ≤0.12                    | 0.25              | ≤0.12 – >16     | 93.9                       |
|                                                   | Aztreonam                    | ≤0.015                   | 0.12              | ≤0.015 – 8      | 98.3                       |
|                                                   | Piperacillin–tazobactam      | ≤0.25                    | 1                 | ≤0.25 – 16      | 100                        |
|                                                   | Doripenem                    | 0.25                     | 0.5               | 0.06 – 1        | 100                        |
|                                                   | Imipenem                     | 2                        | 4                 | 0.25 – 8        | 31.7                       |
|                                                   | Meropenem                    | 0.06                     | 0.12              | 0.03 – 0.5      | 100                        |
|                                                   | Amikacin                     | 2                        | 8                 | 0.5 – >32       | 99.4                       |
|                                                   | Colistin (n=93) <sup>d</sup> | >4                       | >4                | >4 – >4         | 0                          |
|                                                   | Tigecycline                  | 2                        | 4                 | 0.12 – 8        | 71.1                       |
|                                                   | Levofloxacin                 | 0.12                     | 2                 | ≤0.03 – >4      | 90.0                       |
| Ceftazidime-nonsusceptible (6)                    | Ceftazidime–avibactam        | — <sup>b</sup>           | —                 | 0.03 – 0.12     | 100                        |
|                                                   | Ceftazidime                  | —                        | —                 | 8 – 128         | 0                          |
|                                                   | Cefepime                     | —                        | —                 | ≤0.12 – >16     | 50.0                       |
|                                                   | Aztreonam                    | —                        | —                 | 0.5 – 8         | 66.7                       |
|                                                   | Piperacillin–tazobactam      | —                        | —                 | ≤0.25 – 1       | 100                        |
|                                                   | Doripenem                    | —                        | —                 | 0.12 – 0.5      | 100                        |
|                                                   | Imipenem                     | —                        | —                 | 1 – 4           | 16.7                       |
|                                                   | Meropenem                    | —                        | —                 | 0.06 – 0.25     | 100                        |
|                                                   | Amikacin                     | —                        | —                 | 0.5 – 4         | 100                        |
|                                                   | Colistin (n=4) <sup>d</sup>  | —                        | —                 | >4 – >4         | 0                          |
|                                                   | Tigecycline                  | —                        | —                 | 0.5 – 8         | 66.7                       |
|                                                   | Levofloxacin                 | —                        | —                 | ≤0.03 – 2       | 100                        |
| Multidrug-resistant (1)                           | Ceftazidime–avibactam        | — <sup>b</sup>           | —                 | 0.12            | 100                        |
|                                                   | Ceftazidime                  | —                        | —                 | 1               | 100                        |
|                                                   | Cefepime                     | —                        | —                 | 4               | 0                          |
|                                                   | Aztreonam                    | —                        | —                 | 0.25            | 100                        |
|                                                   | Piperacillin–tazobactam      | —                        | —                 | 16              | 100                        |
|                                                   | Doripenem                    | —                        | —                 | 0.12            | 100                        |
|                                                   | Imipenem                     | —                        | —                 | 4               | 0                          |
|                                                   | Meropenem                    | —                        | —                 | 0.12            | 100                        |
|                                                   | Amikacin                     | —                        | —                 | >32             | 0                          |
|                                                   | Colistin (n=1) <sup>d</sup>  | —                        | —                 | >4              | 0                          |
|                                                   | Tigecycline                  | —                        | —                 | 1               | 100                        |
|                                                   | Levofloxacin                 | —                        | —                 | >4              | 0                          |

| Phenotype/Organism (no. of isolates) <sup>a</sup> | Antimicrobial agent           | MIC ( $\mu\text{g/ml}$ ) <sup>b</sup> |                   |              | % Susceptible <sup>c</sup> |
|---------------------------------------------------|-------------------------------|---------------------------------------|-------------------|--------------|----------------------------|
|                                                   |                               | MIC <sub>50</sub>                     | MIC <sub>90</sub> | Range        |                            |
| <i>Other Enterobacteriaceae</i> <sup>f</sup>      |                               |                                       |                   |              |                            |
| All (29) <sup>1</sup>                             | Ceftazidime–avibactam         | 0.12                                  | 0.5               | 0.06 – 0.5   | 100                        |
|                                                   | Ceftazidime                   | 0.12                                  | 0.5               | 0.12 – 64    | 93.1                       |
|                                                   | Cefepime                      | ≤0.12                                 | 1                 | ≤0.12 – 4    | 96.6                       |
|                                                   | Aztreonam                     | 0.12                                  | 1                 | 0.03 – >128  | 93.1                       |
|                                                   | Piperacillin–tazobactam       | 2                                     | 4                 | 0.5 – 16     | 100                        |
|                                                   | Doripenem                     | 0.12                                  | 0.12              | 0.015 – 0.25 | 100                        |
|                                                   | Imipenem                      | 0.5                                   | 1                 | 0.25 – 1     | 100                        |
|                                                   | Meropenem                     | 0.06                                  | 0.12              | 0.03 – 0.12  | 100                        |
|                                                   | Amikacin                      | 2                                     | 4                 | 0.5 – 8      | 100                        |
|                                                   | Colistin (n=14) <sup>d</sup>  | >4                                    | >4                | 2 – >4       | 7.1                        |
|                                                   | Tigecycline                   | 1                                     | 2                 | 0.5 – 4      | 93.1                       |
|                                                   | Levofloxacin                  | 0.25                                  | >4                | 0.06 – >4    | 86.2                       |
| Ceftazidime-nonsusceptible (2)                    | Ceftazidime–avibactam         | — <sup>b</sup>                        | —                 | 0.5 – 0.5    | 100                        |
|                                                   | Ceftazidime                   | —                                     | —                 | 64 – 64      | 0                          |
|                                                   | Cefepime                      | —                                     | —                 | 2 – 4        | 50.0                       |
|                                                   | Aztreonam                     | —                                     | —                 | 128 – >128   | 0                          |
|                                                   | Piperacillin–tazobactam       | —                                     | —                 | 16 – 16      | 100                        |
|                                                   | Doripenem                     | —                                     | —                 | 0.06 – 0.12  | 100                        |
|                                                   | Imipenem                      | —                                     | —                 | 0.5 – 0.5    | 100                        |
|                                                   | Meropenem                     | —                                     | —                 | 0.06 – 0.06  | 100                        |
|                                                   | Amikacin                      | —                                     | —                 | 8 – 8        | 100                        |
|                                                   | Colistin (n=2) <sup>d</sup>   | —                                     | —                 | 2 – >4       | 50.0                       |
|                                                   | Tigecycline                   | —                                     | —                 | 1 – 4        | 50.0                       |
|                                                   | Levofloxacin                  | —                                     | —                 | 4 – >4       | 0                          |
| Multidrug-resistant (1)                           | Ceftazidime–avibactam         | — <sup>b</sup>                        | —                 | 0.5          | 100                        |
|                                                   | Ceftazidime                   | —                                     | —                 | 64           | 0                          |
|                                                   | Cefepime                      | —                                     | —                 | 4            | 0                          |
|                                                   | Aztreonam                     | —                                     | —                 | >128         | 0                          |
|                                                   | Piperacillin–tazobactam       | —                                     | —                 | 16           | 100                        |
|                                                   | Doripenem                     | —                                     | —                 | 0.12         | 100                        |
|                                                   | Imipenem                      | —                                     | —                 | 0.5          | 100                        |
|                                                   | Meropenem                     | —                                     | —                 | 0.06         | 100                        |
|                                                   | Amikacin                      | —                                     | —                 | 8            | 100                        |
|                                                   | Colistin (n=1) <sup>d</sup>   | —                                     | —                 | >4           | 0                          |
|                                                   | Tigecycline                   | —                                     | —                 | 4            | 0                          |
|                                                   | Levofloxacin                  | —                                     | —                 | >4           | 0                          |
| <i>Pseudomonas aeruginosa</i>                     |                               |                                       |                   |              |                            |
| All (302)                                         | Ceftazidime–avibactam         | 2                                     | 128               | 0.03 – >128  | 83.1                       |
|                                                   | Ceftazidime                   | 4                                     | >128              | 0.25 – >128  | 71.5                       |
|                                                   | Cefepime                      | 4                                     | >16               | 0.25 – >16   | 74.2                       |
|                                                   | Aztreonam                     | 8                                     | 128               | 0.12 – >128  | 57.3                       |
|                                                   | Piperacillin–tazobactam       | 8                                     | >128              | ≤0.25 – >128 | 65.9                       |
|                                                   | Doripenem                     | 1                                     | >4                | 0.03 – >4    | 69.2                       |
|                                                   | Imipenem                      | 2                                     | >8                | 0.25 – >8    | 59.6                       |
|                                                   | Meropenem                     | 0.5                                   | >8                | 0.03 – >8    | 68.5                       |
|                                                   | Amikacin                      | 4                                     | 32                | ≤0.25 – >32  | 88.4                       |
|                                                   | Colistin (n=222) <sup>d</sup> | 2                                     | 2                 | 0.25 – >8    | 91.0                       |
|                                                   | Levofloxacin                  | 0.5                                   | >4                | ≤0.03 – >4   | 73.2                       |
| All, MBL-negative (282)                           | Ceftazidime–avibactam         | 2                                     | 16                | 0.03 – >128  | 89.0                       |
|                                                   | Ceftazidime                   | 2                                     | 64                | 0.25 – >128  | 76.6                       |
|                                                   | Cefepime                      | 4                                     | >16               | 0.25 – >16   | 79.4                       |
|                                                   | Aztreonam                     | 8                                     | 64                | 0.12 – >128  | 61.4                       |
|                                                   | Piperacillin–tazobactam       | 8                                     | 128               | ≤0.25 – >128 | 70.6                       |
|                                                   | Doripenem                     | 0.5                                   | >4                | 0.03 – >4    | 74.1                       |
|                                                   | Imipenem                      | 2                                     | >8                | 0.25 – >8    | 63.8                       |
|                                                   | Meropenem                     | 0.5                                   | >8                | 0.03 – >8    | 73.4                       |
|                                                   | Amikacin                      | 4                                     | 16                | ≤0.25 – >32  | 94.0                       |
|                                                   | Colistin (n=210) <sup>d</sup> | 2                                     | 2                 | 0.25 – 8     | 91.9                       |

| Phenotype/Organism (no. of isolates) <sup>a</sup> | Antimicrobial agent          | MIC (µg/ml) <sup>b</sup> |                   |             | % Susceptible <sup>c</sup> |
|---------------------------------------------------|------------------------------|--------------------------|-------------------|-------------|----------------------------|
|                                                   |                              | MIC <sub>50</sub>        | MIC <sub>90</sub> | Range       |                            |
|                                                   | Levofloxacin                 | 0.5                      | >4                | ≤0.03 – >4  | 78.4                       |
| Ceftazidime-nonsusceptible (86)                   | Ceftazidime–avibactam        | 16                       | >128              | 0.03 – >128 | 40.7                       |
|                                                   | Ceftazidime                  | 128                      | >128              | 16 – >128   | 0                          |
|                                                   | Cefepime                     | >16                      | >16               | 2 – >16     | 16.3                       |
|                                                   | Aztreonam                    | 64                       | >128              | 1 – >128    | 3.5                        |
|                                                   | Piperacillin–tazobactam      | 128                      | >128              | 2 – >128    | 5.8                        |
|                                                   | Doripenem                    | >4                       | >4                | 0.12 – >4   | 30.2                       |
|                                                   | Imipenem                     | >8                       | >8                | 0.25 – >8   | 25.6                       |
|                                                   | Meropenem                    | >8                       | >8                | 0.03 – >8   | 31.4                       |
|                                                   | Amikacin                     | 8                        | >32               | 1 – >32     | 61.6                       |
|                                                   | Colistin (n=68) <sup>d</sup> | 2                        | 4                 | 0.25 – 4    | 89.7                       |
|                                                   | Levofloxacin                 | >4                       | >4                | ≤0.03 – >4  | 34.9                       |
| Ceftazidime-nonsusceptible, MBL–negative (66)     | Ceftazidime–avibactam        | 8                        | >128              | 0.03 – >128 | 53.0                       |
|                                                   | Ceftazidime                  | 64                       | >128              | 16 – >128   | 0                          |
|                                                   | Cefepime                     | >16                      | >16               | 2 – >16     | 21.2                       |
|                                                   | Aztreonam                    | 64                       | >128              | 1 – >128    | 4.6                        |
|                                                   | Piperacillin–tazobactam      | 128                      | >128              | 2 – >128    | 7.6                        |
|                                                   | Doripenem                    | >4                       | >4                | 0.12 – >4   | 39.4                       |
|                                                   | Imipenem                     | >8                       | >8                | 0.25 – >8   | 33.3                       |
|                                                   | Meropenem                    | 8                        | >8                | 0.03 – >8   | 40.9                       |
|                                                   | Amikacin                     | 4                        | >32               | 1 – >32     | 77.3                       |
|                                                   | Colistin (n=56) <sup>d</sup> | 2                        | 2                 | 0.25 – 4    | 92.9                       |
|                                                   | Levofloxacin                 | 4                        | >4                | ≤0.03 – >4  | 45.5                       |
| Meropenem-nonsusceptible (95)                     | Ceftazidime–avibactam        | 16                       | >128              | 1 – >128    | 48.4                       |
|                                                   | Ceftazidime                  | 64                       | >128              | 2 – >128    | 37.9                       |
|                                                   | Cefepime                     | >16                      | >16               | 1 – >16     | 35.8                       |
|                                                   | Aztreonam                    | 32                       | >128              | 4 – >128    | 19.0                       |
|                                                   | Piperacillin–tazobactam      | 64                       | >128              | 4 – >128    | 24.2                       |
|                                                   | Doripenem                    | >4                       | >4                | 1 – >4      | 5.3                        |
|                                                   | Imipenem                     | >8                       | >8                | 1 – >8      | 3.2                        |
|                                                   | Meropenem                    | >8                       | >8                | 4 – >8      | 0                          |
|                                                   | Amikacin                     | 8                        | >32               | 1 – >32     | 63.2                       |
|                                                   | Colistin (n=70) <sup>d</sup> | 2                        | 2                 | 1 – 4       | 92.9                       |
|                                                   | Levofloxacin                 | >4                       | >4                | 0.25 – >4   | 27.4                       |
| Meropenem-nonsusceptible, MBL–negative (75)       | Ceftazidime–avibactam        | 4                        | >128              | 1 – >128    | 61.3                       |
|                                                   | Ceftazidime                  | 16                       | >128              | 2 – >128    | 48.0                       |
|                                                   | Cefepime                     | 16                       | >16               | 1 – >16     | 45.3                       |
|                                                   | Aztreonam                    | 32                       | >128              | 4 – >128    | 24.0                       |
|                                                   | Piperacillin–tazobactam      | 64                       | >128              | 4 – >128    | 30.7                       |
|                                                   | Doripenem                    | >4                       | >4                | 1 – >4      | 6.7                        |
|                                                   | Imipenem                     | >8                       | >8                | 1 – >8      | 4.0                        |
|                                                   | Meropenem                    | >8                       | >8                | 4 – >8      | 0                          |
|                                                   | Amikacin                     | 4                        | >32               | 1 – >32     | 77.3                       |
|                                                   | Colistin (n=58) <sup>d</sup> | 2                        | 2                 | 1 – 4       | 96.6                       |
|                                                   | Levofloxacin                 | 4                        | >4                | 0.25 – >4   | 34.7                       |
| Colistin–resistant (1) <sup>f</sup>               | Ceftazidime–avibactam        | — <sup>b</sup>           | —                 | 4           | 100                        |
|                                                   | Ceftazidime                  | —                        | —                 | 4           | 100                        |
|                                                   | Cefepime                     | —                        | —                 | 8           | 100                        |
|                                                   | Aztreonam                    | —                        | —                 | 8           | 100                        |
|                                                   | Piperacillin–tazobactam      | —                        | —                 | 4           | 100                        |
|                                                   | Doripenem                    | —                        | —                 | 1           | 100                        |
|                                                   | Imipenem                     | —                        | —                 | 4           | 0                          |
|                                                   | Meropenem                    | —                        | —                 | 2           | 100                        |
|                                                   | Amikacin                     | —                        | —                 | 16          | 100                        |
|                                                   | Colistin (n=1) <sup>d</sup>  | —                        | —                 | >4          | 0                          |
|                                                   | Levofloxacin                 | —                        | —                 | 2           | 100                        |
| Multidrug–resistant (64)                          | Ceftazidime–avibactam        | 64                       | >128              | 2 – >128    | 21.9                       |
|                                                   | Ceftazidime                  | >128                     | >128              | 4 – >128    | 6.3                        |

| Phenotype/Organism (no. of isolates) <sup>a</sup> | Antimicrobial agent          | MIC (µg/ml) <sup>b</sup> |                   |           | % Susceptible <sup>c</sup> |
|---------------------------------------------------|------------------------------|--------------------------|-------------------|-----------|----------------------------|
|                                                   |                              | MIC <sub>50</sub>        | MIC <sub>90</sub> | Range     |                            |
|                                                   | Cefepime                     | >16                      | >16               | 16 – >16  | 0                          |
|                                                   | Aztreonam                    | 128                      | >128              | 8 – >128  | 3.1                        |
|                                                   | Piperacillin–tazobactam      | >128                     | >128              | 16 – >128 | 1.6                        |
|                                                   | Doripenem                    | >4                       | >4                | 0.25 – >4 | 9.4                        |
|                                                   | Imipenem                     | >8                       | >8                | 2 – >8    | 7.8                        |
|                                                   | Meropenem                    | >8                       | >8                | 0.25 – >8 | 9.4                        |
|                                                   | Amikacin                     | 32                       | >32               | 1 – >32   | 45.3                       |
|                                                   | Colistin (n=48) <sup>d</sup> | 2                        | 2                 | 0.25 – 4  | 91.7                       |
|                                                   | Levofloxacin                 | >4                       | >4                | 0.25 – >4 | 10.9                       |
| Multidrug-resistant, MBL-negative (44)            | Ceftazidime–avibactam        | 16                       | >128              | 2 – >128  | 31.8                       |
|                                                   | Ceftazidime                  | >128                     | >128              | 4 – >128  | 9.1                        |
|                                                   | Cefepime                     | >16                      | >16               | 16 – >16  | 0                          |
|                                                   | Aztreonam                    | 64                       | >128              | 8 – >128  | 4.6                        |
|                                                   | Piperacillin–tazobactam      | >128                     | >128              | 16 – >128 | 2.3                        |
|                                                   | Doripenem                    | >4                       | >4                | 0.25 – >4 | 13.6                       |
|                                                   | Imipenem                     | >8                       | >8                | 2 – >8    | 11.4                       |
|                                                   | Meropenem                    | >8                       | >8                | 0.25 – >8 | 13.6                       |
|                                                   | Amikacin                     | 16                       | >32               | 1 – >32   | 61.4                       |
|                                                   | Colistin (n=36) <sup>d</sup> | 2                        | 2                 | 0.25 – 4  | 97.2                       |
|                                                   | Levofloxacin                 | >4                       | >4                | 0.25 – >4 | 15.9                       |

<sup>a</sup> MBL-negative, no gene encoding a metallo-β-lactamase was detected by PCR.

<sup>b</sup> —, MIC<sub>50</sub> and MIC<sub>90</sub> were not calculated for n < 10 isolates.

<sup>c</sup> % Susceptibility was determined according to CLSI 2016 breakpoints with the exception of ceftazidime–avibactam and tigecycline, where US FDA breakpoints were applied. Because CLSI colistin breakpoints are not available for the *Enterobacteriaceae*, susceptibility for this organism group was determined using the EUCAST 2016 breakpoints for colistin.

<sup>d</sup> Values are for colistin tested without 0.002% polysorbate-80; isolates collected in 2014–2015 only.

<sup>e</sup> Excludes isolates of *Proteae* and *Serratia* spp. that are intrinsically resistant to colistin.

<sup>f</sup> All isolates were MBL-negative.

<sup>g</sup> ND, not determined; MIC range and % susceptible were not calculated for n=0 isolates.

<sup>h</sup> *Enterobacter* spp. includes *Enterobacter aerogenes* (n=58), *Enterobacter asburiae* (n=9), *Enterobacter cloacae* (n=76), *Enterobacter kobei* (n=6).

<sup>i</sup> All isolates were MBL-positive.

<sup>j</sup> *Citrobacter* spp. includes *Citrobacter amalonaticus* (n=1), *Citrobacter braakii* (n=2), *Citrobacter farmeri* (n=1), *Citrobacter freundii* (n=29), and *Citrobacter koseri* (n=36).

<sup>k</sup> *Proteae* includes *Morganella morganii* (n=41), *Proteus mirabilis* (n=79), *Proteus penneri* (n=1), *Proteus vulgaris* (n=49), *Providencia rettgeri* (n=4), and *Providencia stuartii* (n=6).

<sup>l</sup> Other *Enterobacteriaceae* includes *Klebsiella ozaenae* (n=1), *Kluyvera ascorbata* (n=1) and *Serratia marcescens* (n=27).

**Supplemental Table S10B.** Thailand – *In vitro* activities of ceftazidime–avibactam and comparator antimicrobial agents tested against 537 isolates of  $\beta$ –lactamase–positive *Enterobacteriaceae* (n=425) and *P. aeruginosa* (n=112) collected as part of the INFORM global surveillance program in 2012–2015.

| Organism/ Genotype (no. of isolates) <sup>a</sup>    | Antimicrobial agent                             | MIC ( $\mu\text{g/ml}$ ) <sup>b</sup> |                   |                      | % Susceptible <sup>c</sup> |
|------------------------------------------------------|-------------------------------------------------|---------------------------------------|-------------------|----------------------|----------------------------|
|                                                      |                                                 | MIC <sub>50</sub>                     | MIC <sub>90</sub> | Range                |                            |
| <i>Enterobacteriaceae</i> (425)<br>OSBL–positive (4) | Ceftazidime–avibactam                           | — <sup>b</sup>                        | —                 | 0.12 – 0.5           | 100                        |
|                                                      | Ceftazidime                                     | —                                     | —                 | 0.5 – 16             | 50.0                       |
|                                                      | Cefepime                                        | —                                     | —                 | $\leq 0.12$ – 2      | 100                        |
|                                                      | Aztreonam                                       | —                                     | —                 | 0.25 – $>128$        | 75.0                       |
|                                                      | Piperacillin–tazobactam                         | —                                     | —                 | 16 – 128             | 50.0                       |
|                                                      | Doripenem                                       | —                                     | —                 | 0.06 – 0.12          | 100                        |
|                                                      | Imipenem                                        | —                                     | —                 | 0.25 – 0.5           | 100                        |
|                                                      | Meropenem                                       | —                                     | —                 | 0.03 – 0.25          | 100                        |
|                                                      | Amikacin                                        | —                                     | —                 | 1 – 32               | 75.0                       |
|                                                      | Colistin (n=2) <sup>d</sup>                     | —                                     | —                 | 0.25 – 2             | 100                        |
|                                                      | Tigecycline                                     | —                                     | —                 | 0.25 – 1             | 100                        |
|                                                      | Levofloxacin                                    | —                                     | —                 | 0.25 – $>4$          | 25.0                       |
|                                                      | ESBL–positive (348) <sup>e</sup>                | Ceftazidime–avibactam                 | 0.12              | 0.5                  | $\leq 0.015$ – 4           |
| Ceftazidime                                          |                                                 | 32                                    | $>128$            | 0.25 – $>128$        | 17.8                       |
| Cefepime                                             |                                                 | $>16$                                 | $>16$             | $\leq 0.12$ – $>16$  | 7.8                        |
| Aztreonam                                            |                                                 | 64                                    | $>128$            | 1 – $>128$           | 9.5                        |
| Piperacillin–tazobactam                              |                                                 | 8                                     | $>128$            | $\leq 0.25$ – $>128$ | 68.4                       |
| Doripenem                                            |                                                 | 0.06                                  | 0.12              | 0.015 – 4            | 99.7                       |
| Imipenem                                             |                                                 | 0.25                                  | 0.5               | 0.06 – 8             | 98.0                       |
| Meropenem                                            |                                                 | 0.03                                  | 0.06              | 0.008 – 8            | 99.4                       |
| Amikacin                                             |                                                 | 4                                     | 8                 | 0.5 – $>32$          | 96.8                       |
| Colistin (n=194) <sup>d</sup>                        |                                                 | 0.5                                   | 1                 | 0.25 – $>4$          | 93.8                       |
| Tigecycline                                          |                                                 | 0.5                                   | 1                 | 0.06 – 8             | 97.7                       |
| Levofloxacin                                         |                                                 | $>4$                                  | $>4$              | $\leq 0.03$ – $>4$   | 32.8                       |
| AmpC–positive (41) <sup>f</sup>                      |                                                 | Ceftazidime–avibactam                 | 0.12              | 0.5                  | 0.06 – 64                  |
|                                                      | Ceftazidime                                     | 8                                     | $>128$            | 0.06 – $>128$        | 46.3                       |
|                                                      | Cefepime                                        | $\leq 0.12$                           | 4                 | $\leq 0.12$ – $>16$  | 85.4                       |
|                                                      | Aztreonam                                       | 8                                     | 32                | 0.06 – $>128$        | 48.8                       |
|                                                      | Piperacillin–tazobactam                         | 4                                     | $>128$            | $\leq 0.25$ – $>128$ | 80.5                       |
|                                                      | Doripenem                                       | 0.06                                  | 0.5               | 0.03 – $>4$          | 97.6                       |
|                                                      | Imipenem                                        | 2                                     | 2                 | 0.12 – $>8$          | 41.5                       |
|                                                      | Meropenem                                       | 0.06                                  | 0.12              | 0.03 – $>8$          | 97.6                       |
|                                                      | Amikacin                                        | 2                                     | 4                 | 0.5 – 16             | 100                        |
|                                                      | Colistin (n=20) <sup>d</sup>                    | 0.5                                   | 4                 | 0.5 – $>4$           | 85.0                       |
|                                                      | Tigecycline                                     | 0.5                                   | 2                 | 0.06 – 8             | 90.2                       |
|                                                      | Levofloxacin                                    | 0.12                                  | $>4$              | $\leq 0.03$ – $>4$   | 70.7                       |
|                                                      | ESBL–positive + AmpC–positive (10) <sup>g</sup> | Ceftazidime–avibactam                 | 0.5               | 2                    | 0.06 – 64                  |
| Ceftazidime                                          |                                                 | 128                                   | $>128$            | 8 – $>128$           | 0                          |
| Cefepime                                             |                                                 | $>16$                                 | $>16$             | 16 – $>16$           | 0                          |
| Aztreonam                                            |                                                 | 128                                   | $>128$            | 32 – $>128$          | 0                          |
| Piperacillin–tazobactam                              |                                                 | 16                                    | $>128$            | 2 – $>128$           | 50.0                       |
| Doripenem                                            |                                                 | 0.12                                  | 0.25              | 0.06 – 0.5           | 100                        |
| Imipenem                                             |                                                 | 0.5                                   | 2                 | 0.25 – $>8$          | 80.0                       |
| Meropenem                                            |                                                 | 0.06                                  | 0.12              | 0.03 – 0.25          | 100                        |
| Amikacin                                             |                                                 | 2                                     | 8                 | 2 – 8                | 100                        |
| Colistin (n=5) <sup>d</sup>                          |                                                 | — <sup>b</sup>                        | —                 | 0.25 – 1             | 100                        |
| Tigecycline                                          |                                                 | 0.5                                   | 1                 | 0.06 – 2             | 100                        |
| Levofloxacin                                         |                                                 | $>4$                                  | $>4$              | 1 – $>4$             | 20.0                       |
| GES carbapenemase–positive (1) <sup>h</sup>          |                                                 | Ceftazidime–avibactam                 | — <sup>b</sup>    | —                    | 0.06                       |
|                                                      | Ceftazidime                                     | —                                     | —                 | 4                    | 100                        |



| Organism/ Genotype (no. of isolates) <sup>a</sup>               | Antimicrobial agent          | MIC (µg/ml) <sup>b</sup> |                   |           | % Susceptible <sup>c</sup> |
|-----------------------------------------------------------------|------------------------------|--------------------------|-------------------|-----------|----------------------------|
|                                                                 |                              | MIC <sub>50</sub>        | MIC <sub>90</sub> | Range     |                            |
|                                                                 | Cefepime                     | —                        | —                 | 2         | 100                        |
|                                                                 | Aztreonam                    | —                        | —                 | 4         | 100                        |
|                                                                 | Piperacillin–tazobactam      | —                        | —                 | 1         | 100                        |
|                                                                 | Doripenem                    | —                        | —                 | 0.06      | 100                        |
|                                                                 | Imipenem                     | —                        | —                 | 0.5       | 100                        |
|                                                                 | Meropenem                    | —                        | —                 | 0.06      | 100                        |
|                                                                 | Amikacin                     | —                        | —                 | 2         | 100                        |
|                                                                 | Colistin (n=1) <sup>d</sup>  | —                        | —                 | 0.5       | 100                        |
|                                                                 | Tigecycline                  | —                        | —                 | 1         | 100                        |
|                                                                 | Levofloxacin                 | —                        | —                 | 0.5       | 100                        |
| OXA-48-like-positive (6) <sup>i</sup>                           | Ceftazidime–avibactam        | — <sup>b</sup>           | —                 | 0.25–2    | 100                        |
|                                                                 | Ceftazidime                  | —                        | —                 | 0.5–>128  | 16.7                       |
|                                                                 | Cefepime                     | —                        | —                 | ≤0.12–>16 | 16.7                       |
|                                                                 | Aztreonam                    | —                        | —                 | 0.12–>128 | 16.7                       |
|                                                                 | Piperacillin–tazobactam      | —                        | —                 | 128–>128  | 0                          |
|                                                                 | Doripenem                    | —                        | —                 | 0.25–>4   | 83.3                       |
|                                                                 | Imipenem                     | —                        | —                 | 1–>8      | 33.3                       |
|                                                                 | Meropenem                    | —                        | —                 | 1–>8      | 33.3                       |
|                                                                 | Amikacin                     | —                        | —                 | 1–8       | 100                        |
|                                                                 | Colistin (n=6) <sup>d</sup>  | —                        | —                 | 0.25–>4   | 83.3                       |
|                                                                 | Tigecycline                  | —                        | —                 | 0.12–0.5  | 100                        |
|                                                                 | Levofloxacin                 | —                        | —                 | >4–>4     | 0                          |
| MBL-positive (15) <sup>j</sup>                                  | Ceftazidime–avibactam        | >128                     | >128              | 64–>128   | 0                          |
|                                                                 | Ceftazidime                  | >128                     | >128              | >128–>128 | 0                          |
|                                                                 | Cefepime                     | >16                      | >16               | >16–>16   | 0                          |
|                                                                 | Aztreonam                    | 128                      | >128              | 0.06–>128 | 20.0                       |
|                                                                 | Piperacillin–tazobactam      | >128                     | >128              | 4–>128    | 6.7                        |
|                                                                 | Doripenem                    | >4                       | >4                | >4–>4     | 0                          |
|                                                                 | Imipenem                     | >8                       | >8                | >8–>8     | 0                          |
|                                                                 | Meropenem                    | >8                       | >8                | >8–>8     | 0                          |
|                                                                 | Amikacin                     | 4                        | >32               | 1–>32     | 80.0                       |
|                                                                 | Colistin (n=11) <sup>d</sup> | 0.5                      | >4                | 0.25–>4   | 81.8                       |
|                                                                 | Tigecycline                  | 1                        | 2                 | 0.06–2    | 100                        |
|                                                                 | Levofloxacin                 | >4                       | >4                | 0.06–>4   | 26.7                       |
| <i>P. aeruginosa</i> (112)<br>ESBL-positive (15) <sup>k,l</sup> | Ceftazidime–avibactam        | 128                      | >128              | 16–>128   | 0                          |
|                                                                 | Ceftazidime                  | >128                     | >128              | >128–>128 | 0                          |
|                                                                 | Cefepime                     | >16                      | >16               | >16–>16   | 0                          |
|                                                                 | Aztreonam                    | >128                     | >128              | 128–>128  | 0                          |
|                                                                 | Piperacillin–tazobactam      | 128                      | >128              | 16–>128   | 6.7                        |
|                                                                 | Doripenem                    | >4                       | >4                | 4–>4      | 0                          |
|                                                                 | Imipenem                     | >8                       | >8                | 4–>8      | 0                          |
|                                                                 | Meropenem                    | >8                       | >8                | 8–>8      | 0                          |
|                                                                 | Amikacin                     | 32                       | >32               | 8–>32     | 40.0                       |
|                                                                 | Colistin (n=12) <sup>d</sup> | 2                        | 2                 | 2–2       | 100                        |
|                                                                 | Levofloxacin                 | >4                       | >4                | >4–>4     | 0                          |
| GES carbapenemase-positive (2) <sup>k,m</sup>                   | Ceftazidime–avibactam        | — <sup>b</sup>           | —                 | 4–4       | 100                        |
|                                                                 | Ceftazidime                  | —                        | —                 | 8–16      | 50.0                       |
|                                                                 | Cefepime                     | —                        | —                 | 16–16     | 0                          |
|                                                                 | Aztreonam                    | —                        | —                 | 8–16      | 50.0                       |
|                                                                 | Piperacillin–tazobactam      | —                        | —                 | 64–64     | 0                          |
|                                                                 | Doripenem                    | —                        | —                 | >4–>4     | 0                          |
|                                                                 | Imipenem                     | —                        | —                 | >8–>8     | 0                          |
|                                                                 | Meropenem                    | —                        | —                 | >8–>8     | 0                          |
|                                                                 | Amikacin                     | —                        | —                 | >32–>32   | 0                          |
|                                                                 | Colistin (n=2) <sup>d</sup>  | —                        | —                 | 2–2       | 100                        |
|                                                                 | Levofloxacin                 | —                        | —                 | >4–>4     | 0                          |
| GES, Spectrum undefined (1) <sup>k,n</sup>                      | Ceftazidime–avibactam        | — <sup>b</sup>           | —                 | 32        | 0                          |
|                                                                 | Ceftazidime                  | —                        | —                 | >128      | 0                          |

| Organism/ Genotype (no. of isolates) <sup>a</sup>  | Antimicrobial agent          | MIC (µg/ml) <sup>b</sup> |                   |           | % Susceptible <sup>c</sup> |
|----------------------------------------------------|------------------------------|--------------------------|-------------------|-----------|----------------------------|
|                                                    |                              | MIC <sub>50</sub>        | MIC <sub>90</sub> | Range     |                            |
|                                                    | Cefepime                     | —                        | —                 | >16       | 0                          |
|                                                    | Aztreonam                    | —                        | —                 | 32        | 0                          |
|                                                    | Piperacillin–tazobactam      | —                        | —                 | 32        | 0                          |
|                                                    | Doripenem                    | —                        | —                 | >4        | 0                          |
|                                                    | Imipenem                     | —                        | —                 | >8        | 0                          |
|                                                    | Meropenem                    | —                        | —                 | >8        | 0                          |
|                                                    | Amikacin                     | —                        | —                 | 32        | 0                          |
|                                                    | Colistin (n=1) <sup>d</sup>  | —                        | —                 | 1         | 100                        |
|                                                    | Levofloxacin                 | —                        | —                 | >4        | 0                          |
| MBL-positive (20) <sup>k,o</sup>                   | Ceftazidime–avibactam        | 128                      | >128              | 64 – >128 | 0                          |
|                                                    | Ceftazidime                  | >128                     | >128              | 64 – >128 | 0                          |
|                                                    | Cefepime                     | >16                      | >16               | >16 – >16 | 0                          |
|                                                    | Aztreonam                    | 128                      | >128              | 16 – >128 | 0                          |
|                                                    | Piperacillin–tazobactam      | >128                     | >128              | 32 – >128 | 0                          |
|                                                    | Doripenem                    | >4                       | >4                | >4 – >4   | 0                          |
|                                                    | Imipenem                     | >8                       | >8                | >8 – >8   | 0                          |
|                                                    | Meropenem                    | >8                       | >8                | >8 – >8   | 0                          |
|                                                    | Amikacin                     | >32                      | >32               | 4 – >32   | 10.0                       |
|                                                    | Colistin (n=12) <sup>d</sup> | 2                        | 4                 | 1 – 4     | 75.0                       |
|                                                    | Levofloxacin                 | >4                       | >4                | >4 – >4   | 0                          |
| No acquired β-lactamase detected (74) <sup>k</sup> | Ceftazidime–avibactam        | 4                        | 16                | 1 – >128  | 82.4                       |
|                                                    | Ceftazidime                  | 4                        | 64                | 1 – >128  | 66.2                       |
|                                                    | Cefepime                     | 8                        | >16               | 1 – >16   | 66.2                       |
|                                                    | Aztreonam                    | 16                       | 64                | 2 – >128  | 40.5                       |
|                                                    | Piperacillin–tazobactam      | 32                       | >128              | 4 – >128  | 48.6                       |
|                                                    | Doripenem                    | 4                        | >4                | 0.12 – >4 | 28.4                       |
|                                                    | Imipenem                     | >8                       | >8                | 1 – >8    | 4.1                        |
|                                                    | Meropenem                    | 8                        | >8                | 0.12 – >8 | 23.0                       |
|                                                    | Amikacin                     | 4                        | 16                | 1 – >32   | 93.2                       |
|                                                    | Colistin (n=55) <sup>d</sup> | 2                        | 2                 | 1 – 8     | 92.7                       |
|                                                    | Levofloxacin                 | 2                        | >4                | 0.25 – >4 | 55.4                       |

<sup>a</sup> OSBL, original-spectrum β-lactamase (e.g. TEM-1, SHV-1, SHV-11); ESBL, extended-spectrum β-lactamase; MBL, metallo-β-lactamase.

<sup>b</sup> —, MIC<sub>50</sub> and MIC<sub>90</sub> were not calculated for n < 10 isolates.

<sup>c</sup> % Susceptibility was determined according to CLSI 2016 breakpoints with the exception of ceftazidime–avibactam and tigecycline, where US FDA breakpoints were applied. Because CLSI colistin breakpoints are not available for the *Enterobacteriaceae*, susceptibility for this organism group was determined using the EUCAST 2016 breakpoints for colistin.

<sup>d</sup> Values are for colistin tested without 0.002% polysorbate-80; isolates collected in 2014–2015 only.

<sup>e</sup> Includes isolates carrying CTX-M-3; CTX-M-12; CTX-M-14; CTX-M-15; CTX-M-24; CTX-M-27; CTX-M-28; CTX-M-40; CTX-M-55; SHV-2; SHV-2A; SHV-12; VEB-1; VEB-17; CTX-M-15 and other CTX-M-type ESBLs (CTX-M-14; CTX-M-27; CTX-M-40; CTX-M-79); CTX-M-15 and SHV-type ESBLs (SHV-2A; SHV-5; SHV-28; SHV-31); CTX-M-55 and CTX-M-14; CTX-M-55 and CTX-M-75; SHV-12 and CTX-M-type ESBLs (CTX-M-14; CTX-M-15; CTX-M-55); and the chromosomal ESBL common to *K. oxytoca* with or without SHV-type or TEM-type OSBLs or enzymes of undefined spectrum.

<sup>f</sup> Includes isolates carrying CMY-2; CMY-42; and the chromosomal AmpC common to *Citrobacter* spp., *Enterobacter* spp. and *M. morgani* with or without SHV-type or TEM-type OSBLs or enzymes of undefined spectrum.

<sup>g</sup> Includes isolates carrying CMY-2 and CTX-M-15; CMY-2 and CTX-M-55; CMY-42 and CTX-M-24; DHA-1 and CTX-M-15; DHA-1 and CTX-M-15 and SHV-38; and the chromosomal AmpC common to *Enterobacter* spp. and VEB-1, VEB-14, or CTX-M-15.

<sup>h</sup> Isolate carrying GES-13 and CTX-M-3.

<sup>i</sup> Includes isolates carrying OXA-48; OXA-48 and CTX-M-55; OXA-181 and CTX-M-15; OXA-181 and CTX-M-15 and CMY-2; OXA-232 and CTX-M-15 and CMY-27; with and without SHV-OSBLs and/or TEM-OSBLs.

<sup>j</sup> Includes isolates carrying NDM-1; NDM-1 and CTX-M-15; NDM-1 and CTX-M-27; NDM-1 and CTX-M-15 and CTX-M-27; NDM-1 and CTX-M-14 and SHV-12; NDM-1 and CTX-M-15 and OXA-232; NDM-5 and CMY-42; and the chromosomal AmpC common to *Enterobacter* spp. with IMP-14 or NDM-1; with or without SHV-OSBLs and/or TEM-OSBLs.

<sup>k</sup> Assumed to carry the chromosomal AmpC common to *P. aeruginosa*.

<sup>l</sup> Includes isolates carrying VEB-1; VEB-1A; VEB-1B; VEB-11; and VEB-12.

<sup>m</sup> Isolates carrying GES-5.

<sup>n</sup> Isolate carrying GES-29.

<sup>o</sup> Includes isolates carrying IMP-1; IMP-7; IMP-14; IMP-48; VIM-2; VIM-2 and VEB-1; VIM-2 and VEB-1B; VIM-5 and VEB-14; VIM-45 and VEB-1B; and VIM-49 and VEB-14.
